# Supplementary material for: Genetic Affinities within a Large Global Collection of Pathogenic Leptospira: Implications for Strain Identification and Molecular Epidemiology
Source: PLoS One. 2010 Aug 27;5(8):e12637. doi: 10.1371/journal.pone.0012637 (PMC2929200; doi:10.1371/journal.pone.0012637)
Supplement: Table S2 — Full details and multilocus sequences of the Leptospira isolates and strains used in this study. (0.39 MB XLS) [file pone.0012637.s002.xls]

## Sheet: Sheet1
S.No	Sample No	Genome species	Region	Source	adk	icdA	LipL32	LipL41	rrs2	secY
1	Reference 1	L.interrogans	Brazil	-	CTTTCTATTCCTCAGATTTCTACAGGAGATATTTTACGCGAGGCAGTAAAGAATCAAACT GCGATGGGAATAGAAGCAAAACGTTATATGGATGCGGGAGACTTGGTTCCAGATTCCGTA GTGATTGGAATCATAAAAGATCGCATTCGAGAAGCGGATTGTAAAAATGGATTTTTGTTG GATGGATTTCCGAGAACCGTGGAACAAGCGGAAGCTTTAGATACACTTTTAAAAAATGAA GGCAAGTCTATTGATAAAGCGATTAATCTTCAGGTTCCGGATGCGGAACTCTTAAAGAGA TTACTCGGCCGTGCAGAAATAGAAGGTCGCGCGGACGATAACGAAGTGACGATTAAAAAT CGTCTCGATAATTATAATAAGAAGACCTTACCT…	TATCTCGATATAGAACTGGATTATTATGATTTAGGCGTGGAGTACAGGGACAAAACGGAT GATAAAGTAACTGTGGATTCTGCTCACGCGATTCAAAAATATGGAGTAGGCGTAAAATGT GCGACGATTACTCCTAACCAAGATAGAGTTAAAGAATACAATCTCAAACAAGAATGGAAA TCTCCGAACGGAACCATTCGTTCTATTTTAGACGGAACCGTTTTTCGTAAACCGATCATC GTAAAAAATATTCCTCCTGCGGTTCGTTCTTGGAAAAAACCGATTACAGTAGGACGTCAC GCTTACGGAGATCTTTATAAGGACACAGAACTTTATATTCCCGAAGCCGGAAAGGTGGAA CTCGTTTATACCGGAAAGGACGGAAAAGAAAAA…	ATCTCCGTTGCACTCTTTGCAAGCATTACCGCTTGTGGTGCTTTCGGTGGTCTGCCAAGC CTAAAAAGCTCTTTTGTTCTGAGCGAGGACACAATCCCAGGGACAAACGAAACCGTAAAA ACGTTACTTCCCTACGGATCTGTGATCAACTATTACGGATACGTAAAGCCAGGACAAGCG CCGGACGGTTTAGTCGATGGAAACAAAAAAGCATACTATCTCTATGTTTGGATTCCTGCC GTAATCGCTGAAATGGGAGTTCGTATGATTTCCCCAACAGGCGAAATCGGTGAACCAGGC GACGGAGACTTAGTAAGCGACGCTTTCAAAGCGGCTACCCCAGAAGAAAAATCAATGCCA CATTGGTTTGATACTTGGATCCGTGTAGAAAGA…	GGAAATTGCGCAGCTACAGTCGATGTAGAATATCCGGTATTCCCGAAAGATAAAGAAGGC CGTGCACTTCAGAAATTCCTCGGAACCATTCGTAACGTAGGTTTGGCCGTTGAAGCTCCT AAAAAAAGTCTTTGGGAAGCAATTTTCGGTGAAGGTTCCAGCTTTATCGATCAGATGCCT TCTAAAGTTTTCGAGGCGTTTGACAAAGAATCTTATTACAAACTTACCGACCTAAGCAAA CGTGCAGACGCAATCAACGAAGCAAGTCTTTCTCTTACAGGAATCACTAAAAATAGAGCG AAGATCGGAAATCTGATTGGAGCGGAAGCAATTCTATACATAGGTTACCAAAAACCTTAT ACAGAGTGTAGTACTGAAAATAAAATCGATGCG…	CACGTGGGTAATCTTCCTCTGAGTCTGGGATAACTTTCCGAAAGGGAAGCTAATACTGGA TGGTCCCGAGAGATCATAAGATTTTTCGGGTAAAGATTTATTGCTCGGAGATGAGCCCGC GTCCGATTAGCTAGTTGGTGAGGTAAAGGCTCACCAAGGCGACGATCGGTAGCCGGCCTG AGAGGGTGTTCGGCCACAATGGAACTGAGACACGGTCCATACTCCTACGGGAGGCAGCAG TTAAGAATCTTGCTCAATGGGGGGAACCCTGAAGCAGCGACGCCGCGTGAACGATGAAGG TCTTCGGATTGTAAAGTTCAGTAAGCAGGGAAAAATAAGCAGCAATGTGATGATGGTACC TGCCTAAAGCACCGGCTAACTACGTGCCAGCAG…	ATGCCGATCATTTTTGCTTCGTCTTTGATTTTATTTCCTCAGACGATTATTCAATGGTTA TCTAATAGTAGTCAAGAATGGGCTGGATGGGCAGTGATTATGGATTTTTTTAATCCATTC TCTCAGATTTGGTATCATGCGTTATTTTATTTCGTAATTTATACCGCTTTAATTGTATTC TTTGCTTACTTTTATACAGCGATTCAGTTTAATCCTGCAGAATTGGCTGAGAATTTGAAA AAATACGGTGGGTTCATTCCAGGAATTCGTCCGGGTTCTCACACAAAAGAATACATTGAA AAAGTGTTAAATAGAATCACTCTTCCCGGAGCTATGTTTCTTGCAGGTTTGGCATTAGCA CCTTATATTATTATAAAATTCTTAGATTTGAGC…
2	Reference 2	L.interrogans	China	-	CTTTCTATTCCTCAGATTTCTACAGGAGATATTTTACGCGAGGCAGTAAAGAATCAAACT GCGATGGGAATAGAAGCAAAACGTTATATGGATGCGGGAGATTTGGTTCCAGATTCCGTA GTGATTGGAATCATAAAAGATCGCATTCGAGAAGCGGATTGTAAAAATGGATTTTTGTTG GATGGATTTCCGAGAACCGTGGAACAAGCGGAAGCTTTAGATACACTTTTAAAAAATGAA GGCAAGTCTATTGATAAAGCGATTAATCTTCAGGTTCCGGATGCGGAACTCTTAAAGAGA TTACTCGGCCGTGCAGAAATAGAAGGTCGCGCGGACGATAACGAAGTGACGATTAAAAAT CGTCTCGATAATTATAATAAGAAGACCTTACCT…	TATCTCGATATAGAACTGGATTATTATGATTTAGGCGTGGAGTACAGGGACAAAACGGAT GATAAAGTAACCGTGGATTCTGCTCACGCGATTCAAAAATATGGAGTAGGCGTAAAATGT GCGACGATTACTCCTAACCAAGATAGAGTTAAAGAATACAATCTCAAACAAGAATGGAAA TCTCCGAACGGAACCATTCGTTCTATTTTAGACGGAACCGTTTTTCGTAAACCGATCATC GTAAAAAATATTCCTCCTGCGGTTCGTTCTTGGAAAAAACCGATTACAGTAGGACGTCAC GCTTACGGAGATCTTTATAAGGACACAGAACTTTATATTCCCGAAGCCGGAAAGGTGGAA CTCGTTTATACCGGAAAGGACGGAAAAGAAAAA…	ATCTCCGTTGCACTCTTTGCAAGCATTACCGCTTGTGGTGCTTTCGGTGGT CTGCCAAGCCTAAAAAGCTCTTTTGTTCTGAGCGAGGACACAATCCCAGGG ACAAACGAAACCGTAAAAACGTTACTTCCCTACGGATCTGTGATCAACTAT TACGGATACGTAAAGCCAGGACAAGCGCCGGACGGTTTAGTCGATGGAAAC AAAAAAGCATACTATCTCTATGTTTGGATTCCTGCCGTAATCGCTGAAATG GGAGTTCGTATGATTTCCCCAACAGGCGAAATCGGTGAGCCAGGCGACGGA GACTTAGTAAGCGACGCTTTCAAAGCGGCTACCCCAGAAGAAAAATCAATG CCACATTGGTTTGATACTTGGATCCGTGTAGAAAG…	GGAAATTGCGCAGCTACAGTCGATGTAGAATATCCGGTATTCCCGAAAGATAAAGAAGGC CGTGCACTTCAGAAATTCCTCGGAACCATTCGTAACGTAGGTTTGGCTGTTGAAGCTCCT AAAAAAAGTCTTTGGGAAGCAATTTTCGGTGAAGGTTCCAGCTTTATCGATCAGATGCCT TCTAAAGTTTTCGAGGCGTTTGACAAAGAATCTTATTACAAACTTACCGACCTGAGTAAA CGTGCAGACGCAATCAACGAAGCAAGTCTTTCTCTTACAGGAATCACTAAAAATAGAGCG AAGATCGGAAATCTGATTGGAGCGGAAGCAATTCTATACATAGGTTACCAAAAACCTTAT ACAGAGTGTAGTACTGAAAATAAAATCGATGCA…	CACGTGGGTAATCTTCCTCTGAGTCTGGGATAACTTTCCGAAAGGGAAGCTAATACTGGA TGGTCCCGAGAGATCATAAGATTTTTCGGGTAAAGATTTATTGCTCGGAGATGAGCCCGC GTCCGATTAGCTAGTTGGTGAGGTAAAGGCTCACCAAGGCGACGATCGGTAGCCGGCCTG AGAGGGTGTTCGGCCACAATGGAACTGAGACACGGTCCATACTCCTACGGGAGGCAGCAG TTAAGAATCTTGCTCAATGGGGGGAACCCTGAAGCAGCGACGCCGCGTGAACGATGAAGG TCTTCGGATTGTAAAGTTCAGTAAGCAGGGAAAAATAAGCAGCAATGTGATGATGGTACC TGCCTAAAGCACCGGCTAACTACGTGCCAGCAG…	ATGCCGATCATTTTTGCTTCGTCTTTGATTTTATTTCCTCAGACGATTATTCAATGGTTA TCTAATAGTAGTCAAGAATGGGCTGGATGGGCAGTGATTATGGATTTTTTTAATCCATTC TCTCAGATTTGGTATCATGCGTTATTTTATTTCGTAATTTATACCGCTTTAATTGTATTC TTTGCTTACTTTTATACAGCGATTCAGTTTAATCCTGCAGAATTGGCTGAGAATTTGAAA AAATACGGTGGGTTCATTCCAGGAATTCGTCCGGGTTCTCACACAAAAGAATACATTGAA AAAGTGTTAAATAGAATCACTCTTCCCGGAGCTATGTTTCTTGCAGGTTTGGCATTAGCA CCTTATATTATTATAAAATTCTTAGATTTGAGC…
3	Ref1	L.interrogans	Andaman/India	Human Lung	CTTTCTATCCCTCAGATTTCTACGGGTGATATTTTACGGGAAGCCGTAAAAAATCGAACT CCAATGGGAATCGAAGCAAAACGTTATATGGACGCGGGCGACTTGGTTCCCGATTCCGTT GTGATCGGAATCATCCAAGACCGAATTCGTGAAGCGGATTGTAAGAACGGATTTTTATTG GATGGATTCCCGAGAACCGTGGAACAAGCGGATGCTTTGGACGCTCTTCTGAAGAACGAG GGAAAGTCCATCGATAAAGCGATCAATCTCGAAGTCCCAAATGGAGAACTTTTGAAACGA TTGCTCGGCCGTGCGGAGATCGAAGGCCGCGCAGATGACAACGAAGCGACGATCAAAAAT CGTCTGGATAATTATAACAAAAAGACTTTACCT…	TATCTCGATATAGAACTGGATTATTATGATTTAGGCGTGGAGTACAGGGACAAAACGGAT GATAAAGTAACCGTGGATTCTGCTCACGCGATTCAAAAATATGGAGTAGGCGTAAAATGT GCGACGATTACTCCTAACCAAGATAGAGTTAAAGAATACAATCTCAAACAAGAATGGAAA TCTCCGAACGGAACCATTCGTTCTATTTTAGACGGAACCGTTTTTCGTAAACCGATCATC GTAAAAAATATTCCTCCTGCGGTTCGTTCTTGGAAAAAACCGATTACAGTAGGACGTCAC GCTTACGGAGATCTTTATAAGGACACAGAACTTTATATTCCCGAAGCCGGAAAGGTGGAA CTCGTTTATACCGGAAAGGACGGAAAAGAAAAA…	ATCTCCGTTGCACTCTTTGCAAGCATTACCGCTTGTGGTGCTTTCGGTGGTCTGCCAAGC CTAAAAAGCTCTTTTGTTCTGAGCGAGGACACAATCCCAGGGACAAACGAAACCGTAAAA ACGTTACTTCCCTACGGATCTGTGATCAACTATTACGGATACGTAAAGCCAGGACAAGCG CCGGACGGTTTAGTCGATGGAAACAAAAAAGCATACTATCTCTATGTTTGGATTCCTGCC GTAATCGCTGAAATGGGAGTTCGTATGATTTCCCCAACAGGCGAAATCGGTGAACCAGGC GACGGAGACTTAGTAAGCGACGCTTTCAAAGCGGCTACCCCAGAAGAAAAATCAATGCCA CATTGGTTTGATACTTGGATCCGTGTAGAAAGA…	GGAAATTGCGCAGCTACAGTCGATGTAGAATATCCGGTATTCCCGAAAGATAAAGAAGGC CGTGCACTTCAGAAATTCCTCGGAACCATTCGTAACGTAGGTTTGGCCGTTGAAGCTCCT AAAAAAAGTCTTTGGGAAGCAATTTTCGGTGAAGGTTCCAGCTTTATCGATCAGATGCCT TCTAAAGTTTTCGAGGCGTTTGACAAAGAATCTTATTACAAACTTACCGACCTAAGCAAA CGTGCAGACGCAATCAACGAAGCAAGTCTTTCTCTTACAGGAATCACTAAAAATAGAGCG AAGATCGGAAATCTGATTGGAGCGGAAGCAATTCTATACATAGGTTACCAAAAACCTTAT ACAGAGTGTAGTACTGAAAATAAAATCGATGCG…	CACGTGGGTAATCTTCCTCTGAGTCTGGGATAACTTTCCGAAAGGGAAGCTAATACTGGA TGGTCCCGAGAGATCATAAGATTTTTCGGGTAAAGATTTATTGCTCGGAGATGAGCCCGC GTCCGATTAGCTAGTTGGTGAGGTAAAGGCTCACCAAGGCGACGATCGGTAGCCGGCCTG AGAGGGTGTTCGGCCACAATGGAACTGAGACACGGTCCATACTCCTACGGGAGGCAGCAG TTAAGAATCTTGCTCAATGGGGGGAACCCTGAAGCAGCGACGCCGCGTGAACGATGAAGG TCTTCGGATTGTAAAGTTCAGTAAGCAGGGAAAAATAAGCAGCAATGTGATGATGGTACC TGCCTAAAGCACCGGCTAACTACGTGCCAGCAG…	ATGCCGATCATTTTTGCTTCGTCTTGGATTTTATTTCCTCAGACGATTATCCAATGGTTA TCTAATAGTAGTCAAGAATGGGCTGGATGGGCAGTGATTATGGATTTTTTTAATCCATTC TCTCAGATTTGGTATCATGCGTTATTTTATTTCGTAATTTATACCGCTTTAATTGTATTC TTTGCTTACTTTTATACAGCGATTCAGTTTAATCCTGCAGAATTGGCTGAGAATTTGAAA AAATACGGTGGATTCATTCCAGGAATTCGTCCGGGTTCTCACACAAAAGAATATATTGAA AAAGTGTTAAATAGAATCACTCTTCCCGGAGCTATGTTTCTTGCAGGTTTGGCATTAGCA CCTTATATTATTATAAAATTCTTAGATTTGAGC…
4	Ref9	L.interrogans	Unknown	Unknown	CTTTCTATTCCTCAGATTTCTACAGGAGATATTTTACGCGAGGCAGTAAAGAATCAAACT GCGATGGGAATAGAAGCAAAACGTTATATGGATGCGGGAGATTTGGTTCCAGATTCCGTA GTGATTGGAATCATAAAAGATCGCATTCGAGAAGCGGATTGTAAAAATGGATTTTTGTTG GATGGATTTCCGAGAACCGTGGAACAAGCGGAAGCTTTAGATACACTTTTAAAAAATGAA GGCAAGTCTATTGATAAAGCGATTAATCTTCAGGTTCCGGATGCGGAACTCTTAAAGAGA TTACTCGGCCGTGCAGAAATAGAAGGTCGCGCGGACGATAACGAAGTGACGATTAAAAAT CGTCTCGATAATTATAATAAGAAGACCTTACCT…	TATCTCGATATAGAACTGGATTATTATGATTTAGGCGTGGAGTACAGGGACAAAACGGAT GATAAAGTAACCGTGGATTCTGCTCACGCGATTCAAAAATATGGAGTAGGCGTAAAATGT GCGACGATTACTCCTAACCAAGATAGAGTTAAAGAATACAATCTCAAACAAGAATGGAAA TCTCCGAACGGAACCATTCGTTCTATTTTAGACGGAACCGTTTTTCGTAAACCGATCATC GTAAAAAATATTCCTCCTGCGGTTCGTTCTTGGAAAAAACCGATTACAGTAGGACGTCAC GCTTACGGAGATCTTTATAAGGACACAGAACTTTATATTCCCGAAGCCGGAAAGGTGGAA CTCGTTTATACCGGAAAGGACGGAAAAGAAAAA…	ATCTCCGTTGCACTCTTTGCAAGCATTACCGCTTGTGGTGCTTTCGGTGGTCTGCCAAGC CTAAAAAGCTCTTTTGTTCTGAGCGAGGACACAATCCCAGGGACAAACGAAACCGTAAAA ACGTTACTTCCCTACGGATCTGTGATCAACTATTACGGATACGTAAAGCCAGGACAAGCG CCGGACGGTTTAGTCGATGGAAACAAAAAAGCATACTATCTCTATGTTTGGATTCCTGCC GTAATCGCTGAAATGGGAGTTCGTATGATTTCCCCAACAGGCGAAATCGGTGAGCCAGGC GACGGAGACTTAGTAAGCGACGCTTTCAAAGCGGCTACCCCAGAAGAAAAATCAATGCCA CATTGGTTTGATACTTGGATCCGTGTAGAAAGA…	GGAAATTGCGCAGCTACAGTCGATGTAGAATATCCGGTATTCCCGAAAGATAAAGAAGGC CGTGCACTTCAGAAATTCCTCGGAACCATTCGTAACGTAGGTTTGGCTGTTGAAGCTCCT AAAAAAAGTCTTTGGGAAGCAATTTTCGGTGAAGGTTCCAGCTTTATCGATCAGATGCCT TCTAAAGTTTTCGAGGCGTTTGACAAAGAATCTTATTACAAACTTACCGACCTGAGTAAA CGTGCAGACGCAATCAACGAAGCAAGTCTTTCTCTTACAGGAATCACTAAAAATAGAGCG AAGATCGGAAATCTGATTGGAGCGGAAGCAATTCTATACATAGGTTACCAAAAACCTTAT ACAGAGTGTAGTACTGAAAATAAAATCGATGCA…	CACGTGGGTAATCTTCCTCTGAGTCTGGGATAACTTTCCGAAAGGGAAGCTAATACTGGA TGGTCCCGAGAGATCACAAGATTTTTCGGGTAAAGATTTATTGCTCGGAGATGAGCCCGC GTCCGATTAGCTAGTTGGTGAGGTAAAGGCTCACCAAGGCGACGATCGGTAGCCGGCCTG AGAGGGTGTTCGGCCACAATGGAACTGAGACACGGTCCATACTCCTACGGGAGGCAGCAG TTAAGAATCTTGCTCAATGGGGGGAACCCTGAAGCAGCGACGCCGCGTGAACGATGAAGG TCTTCGGATTGTAAAGTTCAGTAAGCAGGGAAAAATAAGCAGCAATGTGATGATGGTACC TGCCTAAAGCACCGGCTAACTACGTGCCAGCAG…	ATGCCGATCATTTTTGCTTCGTCTTTGATTTTATTTCCTCAGACGATTATTCAATGGTTA TCTAATAGTAGTCAAGAATGGGCTGGATGGGCAGTGATTATGGATTTTTTTAATCCATTC TCTCAGATTTGGTATCATGCGGTATTTTATTTCGTAATTTATACCGCTTTAATTGTATTC TTTGCTTACTTCTATACAGCGATTCAGTTTAATCCTGCAGAATTGGCTGAGAATTTGAAA AAATACGGTGGGTTCATTCCAGGAATTCGTCCGGGTTCTCACACAAAAGAATACATTGAA AAAGTGTTAAATAGAATCACTCTTCCCGGAGCTATGTTTCTTGCAGGTTTGGCATTAGCA CCTTATATTATTATAAAATTCTTAGATTTGAGC…
5	Ref11	L.interrogans	Unknown	Unknown	CTTTCTATTCCTCAGATTTCTACAGGAGATATTTTACGCGAGGCAGTAAAGAATCAAACT GCGATGGGAATAGAAGCAAAACGTTATATGGATGCGGGAGACTTGGTTCCAGATTCCGTA GTGATTGGAATCATAAAAGATCGCATTCGAGAAGCGGATTGTAAAAATGGATTTTTGTTG GATGGATTTCCGAGAACCGTGGAACAAGCGGAAGCTTTAGATACACTTTTAAAAAATGAA GGCAAGTCTATTGATAAAGCGATTAATCTTCAGGTTCCGGATGCGGAACTCTTAAAGAGA TTACTCGGCCGTGCAGAAATAGAAGGTCGCGCGGACGATAACGAAGTGACGATTAAAAAT CGTCTCGATAATTATAATAAGAAGACCTTACCT…	TATCTCGATATAGAACTGGATTATTATGATTTAGGCGTGGAGTACAGGGACAAAACGGAT GATAAAGTAACTGTGGATTCTGCTCACGCGATTCAAAAATATGGAGTAGGCGTAAAATGT GCGACGATTACTCCTAACCAAGATAGAGTTAAAGAATACAATCTCAAACAAGAATGGAAA TCTCCGAACGGAACCATTCGTTCTATTTTAGACGGAACCGTTTTTCGTAAACCGATCATC GTAAAAAATATTCCTCCTGCGGTTCGTTCTTGGAAAAAACCGATTACAGTAGGACGTCAC GCTTACGGAGATCTTTATAAGGACACAGAACTTTATATTCCCGAAGCCGGAAAGGTGGAA CTCGTTTATACCGGAAAGGACGGAAAAGAAAAA…	ATCTCCGTTGCACTCTTTGCAAGCATTACCGCTTGTGGTGCTTTCGGTGGTCTGCCAAGC CTAAAAAGCTCTTTTGTTCTGAGCGAGGACACAATCCCAGGGACAAACGAAACCGTAAAA ACGTTACTTCCCTACGGATCTGTGATCAACTATTACGGATACGTAAAGCCAGGACAAGCG CCGGACGGTTTAGTCGATGGAAACAAAAAAGCATACTATCTCTATGTTTGGATTCCTGCC GTAATCGCTGAAATGGGAGTTCGTATGATTTCCCCAACAGGCGAAATCGGTGAGCCAGGC GACGGAGACTTAGTAAGCGACGCTTTCAAAGCGGCTACCCCAGAAGAAAAATCAATGCCA CATTGGTTTGATACTTGGATCCGTGTAGAAAGA…	GGAAATTGCGCAGCTACAGTCGATGTAGAATATCCGGTATTCCCGAAAGATAAAGAAGGC CGTGCACTTCAGAAATTCCTCGGAACCATTCGTAACGTAGGTTTGGCTGTTGAAGCTCCT AAAAAAAGTCTTTGGGAAGCAATTTTCGGTGAAGGTTCCAGCTTTATCGATCAGATGCCT TCTAAAGTTTTCGAGGCGTTTGACAAAGAATCTTATTACAAACTTACCGACCTGAGTAAA CGTGCAGACGCAATCAACGAAGCAAGTCTTTCTCTTACAGGAATCACTAAAAATAGAGCG AAGATCGGAAATCTGATTGGAGCGGAAGCAATTCTATACATAGGTTACCAAAAACCTTAT ACAGAGTGTAGTACTGAAAATAAAATCGATGCA…	CACGTGGGTAATCTTCCTCTGAGTCTGGGATAACTTTCCGAAAGGGAAGCTAATACTGGA TGGTCCCGAGAGATCATAAGATTTTTCGGGTAAAGATTTATTGCTCGGAGATGAGCCCGC GTCCGATTAGCTAGTTGGTGAGGTAAAGGCTCACCAAGGCGACGATCGGTAGCCGGCCTG AGAGGGTGTTCGGCCACAATGGAACTGAGACACGGTCCATACTCCTACGGGAGGCAGCAG TTAAGAATCTTGCTCAATGGGGGGAACCCTGAAGCAGCGACGCCGCGTGAACGATGAAGG TCTTCGGATTGTAAAGTTCAGTAAGCAGGGAAAAATAAGCAGCAATGTGATGATGGTACC TGCCTAAAGCACCGGCTAACTACGTGCCAGCAG…	ATGCCGATCATTTTTGCTTCGTCTTTGATTTTATTTCCTCAGACGATTATTCAATGGTTA TCTAATAGTAGTCAAGAATGGGCTGGATGGGCAGTGATTATGGATTTTTTTAATCCATTC TCTCAGATTTGGTATCATGCGTTATTTTATTTCGTAATTTATACCGCTTTAATTGTATTC TTTGCTTACTTTTATACAGCGATTCAGTTTAATCCTGCAGAATTGGCTGAGAATTTGAAA AAATACGGTGGGTTCATTCCAGGAATTCGTCCGGGTTCTCACACAAAAGAATACATTGAA AAAGTGTTAAATAGAATCACTCTTCCCGGAGCTATGTTTCTTGCAGGTTTGGCATTAGCA CCTTATATTATTATAAAATTCTTAGATTTGAGC…
6	UK3	L.interrogans	Malaysia	Unknown	CTTTCTATTCCTCAGATTTCTACAGGAGATATTTTACGCGAGGCAGTAAAGAATCAAACT GCGATGGGAATAGAAGCAAAACGTTATATGGATGCGGGAGACTTGGTTCCAGATTCCGTA GTGATTGGAATCATAAAAGATCGCATTCGAGAAGCGGATTGTAAAAATGGATTTTTGTTG GATGGATTTCCGAGAACCGTGGAACAAGCGGAAGCTTTAGATACACTTTTAAAAAATGAA GGCAAGTCTATTGATAAAGCGATTAATCTTCAGGTTCCGGATGCGGAACTCTTAAAGAGA TTACTCGGCCGTGCAGAAATAGAAGGTCGCGCGGACGATAACGAAGTGACGATTAAAAAT CGTCTCGATAATTATAATAAGAAGACCTTACCT…	TATCTCGATATAGAACTGGATTATTATGATTTAGGCGTGGAGTACAGGGACAAAACGGAT GATAAAGTAACCGTGGATTCTGCTCACGCGATTCAAAAATATGGAGTAGGCGTAAAATGT GCGACGATTACTCCTAACCAAGATAGAGTTAAAGAATACAATCTCAAACAAGAATGGAAA TCTCCGAACGGAACCATTCGTTCTATTTTAGACGGAACCGTTTTTCGTAAACCGATCATC GTAAAAAATATTCCTCCTGCGGTTCGTTCTTGGAAAAAACCGATTACAGTAGGACGTCAC GCTTACGGAGATCTTTATAAGGACACAGAACTTTATATTCCCGAAGCCGGAAAGGTGGAA CTCGTTTATACCGGAAAGGACGGAAAAGAAAAA…	ATCTCCGTTGCACTCTTTGCAAGCATTACCGCTTGTGGTGCTTTCGGTGGTCTGCCAAGC CTAAAAAGCTCTTTTGTTCTGAGCGAGGACACAATCCCAGGGACAAACGAAACCGTAAAA ACGTTACTTCCCTACGGATCTGTGATCAACTATTACGGATACGTAAAGCCAGGACAAGCG CCGGACGGTTTAGTCGATGGAAACAAAAAAGCATACTATCTCTATGTTTGGATTCCTGCC GTAATCGCTGAAATGGGAGTTCGTATGATTTCCCCAACAGGCGAAATCGGTGAGCCAGGC GACGGAGACTTAGTAAGCGACGCTTTCAAAGCGGCTACCCCAGAAGAAAAATCAATGCCA CATTGGTTTGATACTTGGATCCGTGTAGAAAGA…	GGAAATTGCGCAGCTACAGTCGATGTAGAATATCCGGTATTCCCGAAAGATAAAGAAGGC CGTGCACTTCAGAAATTCCTCGGAACCATTCGTAACGTAGGTTTGGCTGTTGAAGCTCCT AAAAAAAGTCTTTGGGAAGCAATTTTCGGTGAAGGTTCCAGCTTTATCGATCAGATGCCT TCTAAAGTTTTCGAGGCGTTTGACAAAGAATCTTATTACAAACTTACCGACCTGAGTAAA CGTGCAGACGCAATCAACGAAGCAAGTCTTTCTCTTACAGGAATCACTAAAAATAGAGCG AAGATCGGAAATCTGATTGGAGCGGAAGCAATTCTATACATAGGTTACCAAAAACCTTAT ACAGAGTGTAGTACTGAAAATAAAATCGATGCG…	CACGTGGGTAATCTTCCTCTGAGTCTGGGATAACTTTCCGAAAGGGAAGCTAATACTGGA TGGTCCCGAGAGATCACAAGATTTTTCGGGTAAAGATTTATTGCTCGGAGATGAGCCCGC GTCCGATTAGCTAGTTGGTGAGGTAAAGGCTCACCAAGGCGACGATCGGTAGCCGGCCTG AGAGGGTGTTCGGCCACAATGGAACTGAGACACGGTCCATACTCCTACGGGAGGCAGCAG TTAAGAATCTTGCTCAATGGGGGGAACCCTGAAGCAGCGACGCCGCGTGAACGATGAAGG TCTTCGGATTGTAAAGTTCAGTAAGCAGGGAAAAATAAGCAGCAATGTGATGATGGTACC TGCCTAAAGCACCGGCTAACTACGTGCCAGCAG…	ATGCCGATCATTTTTGCTTCGTCTTTGATTTTATTTCCTCAGACGATTATTCAATGGTTA TCTAATAGTAGTCAAGAATGGGCTGGATGGGCAGTGATTATGGATTTTTTTAATCCATTC TCTCAGATTTGGTATCATGCGTTATTTTATTTCGTAATTTATACCGCTTTAATTGTATTC TTTGCTTACTTTTATACAGCGATTCAGTTTAATCCTGCAGAATTGGCTGAGAATTTGAAA AAATACGGTGGGTTCATTCCAGGAATTCGTCCGGGTTCTCACACAAAAGAATACATTGAA AAAGTGTTAAATAGAATCACTCTTCCCGGAGCTATGTTTCTTGCAGGTTTGGCATTAGCA CCTTATATTATTATAAAATTCTCAGATTTGAGC…
7	UK4	L.interrogans	Jamaica	Unknown	CTTTCTATTCCTCAGATTTCTACAGGAGATATTTTACGCGAGGCAGTAAAGAATCAAACT GCGATGGGAATAGAAGCAAAACGTTATATGGATGCGGGAGATTTGGTTCCAGATTCCGTA GTGATTGGAATCATAAAAGATCGCATTCGAGAAGCGGATTGTAAAAATGGATTTTTGTTG GATGGATTTCCGAGAACCGTGGAACAAGCGGAAGCTTTAGATACACTTTTAAAAAATGAA GGCAAGTCTATTGATAAAGCGATTAATCTTCAGGTTCCGGATGCGGAACTCTTAAAGAGA TTACTCGGCCGTGCAGAAATAGAAGGTCGCGCGGACGATAACGAAGTGACGATTAAAAAT CGTCTCGATAATTATAATAAGAAGACCTTACCT…	TATCTCGATATAGAACTGGATTATTATGATTTAGGCGTGGAGTACAGGGACAAAACGGAT GATAAAGTAACTGTGGATTCTGCTCACGCGATTCAAAAATATGGAGTAGGCGTAAAATGT GCGACGATTACTCCTAACCAAGATAGAGTTAAAGAATACAATCTCAAACAAGAATGGAAA TCTCCGAACGGAACCATTCGTTCTATTTTAGACGGAACCGTTTTTCGTAAACCGATCATC GTAAAAAATATTCCTCCTGCGGTTCGTTCTTGGAAAAAACCGATTACAGTAGGACGTCAC GCTTACGGAGATCTTTATAAGGACACAGAACTTTATATTCCCGAAGCCGGAAAGGTGGAA CTCGTTTATACCGGAAAGGACGGAAAAGAAAAA…	ATCTCCGTTGCACTCTTTGCAAGCATTACCGCTTGTGGTGCTTTCGGTGGTCTGCCAAGC CTAAAAAGCTCTTTTGTTCTGAGCGAGGACACAATCCCAGGGACAAACGAAACCGTAAAA ACGTTACTTCCCTACGGATCTGTGATCAACTATTACGGATACGTAAAGCCAGGACAAGCG CCGGACGGTTTAGTCGATGGAAACAAAAAAGCATACTATCTCTATGTTTGGATTCCTGCC GTAATCGCTGAAATGGGAGTTCGTATGATTTCCCCAACAGGCGAAATCGGTGAACCAGGC GACGGAGACTTAGTAAGCGACGCTTTCAAAGCGGCTACCCCAGAAGAAAAATCAATGCCA CATTGGTTTGATACTTGGATCCGTGTAGAAAGA…	GGAAATTGCGCAGCTACAGTCGATGTAGAATATCCGGTATTCCCGAAAGATAAAGAAGGC CGTGCACTTCAGAAATTCCTCGGAACCATTCGTAACGTAGGTTTGGCCGTTGAAGCTCCT AAAAAAAGTCTTTGGGAAGCAATTTTCGGTGAAGGTTCCAGCTTTATCGATCAGATGCCT TCTAAAGTTTTCGAGGCGTTTGACAAAGAATCTTATTACAAACTTACCGACCTAAGCAAA CGTGCAGACGCAATCAACGAAGCAAGTCTTTCTCTTACAGGAATCACTAAAAATAGAGCG AAGATCGGAAATCTGATTGGAGCGGAAGCAATTCTATACATAGGTTACCAAAAACCTTAT ACAGAGTGTAGTACTGAAAATAAAATCGATGCG…	CACGTGGGTAATCTTCCTCTGAGTCTGGGATAACTTTCCGAAAGGGAAGCTAATACTGGA TGGTCCCGAGAGATCACAAGATTTTTCGGGTAAAGATTTATTGCTCGGAGATGAGCCCGC GTCCGATTAGCTAGTTGGTGAGGTAAAGGCTCACCAAGGCGACGATCGGTAGCCGGCCTG AGAGGGTGTTCGGCCACAATGGAACTGAGACACGGTCCATACTCCTACGGGAGGCAGCAG TTAAGAATCTTGCTCAATGGGGGGAACCCTGAAGCAGCGACGCCGCGTGAACGATGAAGG TCTTCGGATTGTAAAGTTCAGTAAGCAGGGAAAAATAAGCAGCAATGTGATGATGGTACC TGCCTAAAGCACCGGCTAACTACGTGCCAGCAG…	ATGCCGATCATTTTTGCTTCGTCTTTGATTTTATTTCCTCAGACGATTATTCAATGGTTA TCTAATAGTAGTCAAGAATGGGCTGGATGGGCAGTGATTATGGATTTTTTTAATCCATTC TCTCAGATTTGGTATCATGCGTTATTTTATTTCGTAATTTATACCGCTTTAATTGTATTC TTTGCTTACTTCTATACAGCGATTCAGTTTAATCCTGAAGAATTGGCTGAGAATTTGAAA AAATACGGTGGATTCATTCCAGGAATTCGTCCGGGTTCTCACACAAAAGAATACATTGAA AAAGTGTTAAATAGAATCACTCTCCCTGGAGCTATGTTTCTTGCAGGTTTGGCATTAGCA CCTTATATTATTATAAAATTCTTAGATTTGAGC…
8	UK5	L.interrogans	Australia	Unknown	CTTTCTATTCCTCAGATTTCTACAGGAGATATTTTACGCGAGGCAGTAAAGAATCAAACT GCGATGGGAATAGAAGCAAAACGTTATATGGATGCGGGAGATTTGGTTCCAGATTCCGTA GTGATTGGAATCATAAAAGATCGCATTCGAGAAGCGGATTGTAAAAATGGATTTTTGTTG GATGGATTTCCGAGAACCGTGGAACAAGCGGAAGCTTTAGATACACTTTTAAAAAATGAA GGCAAGTCTATTGATAAAGCGATTAATCTTCAGGTTCCGGATGCGGAACTCTTAAAGAGA TTACTCGGCCGTGCAGAAATAGAAGGTCGCGCGGACGATAACGAAGTGACGATTAAAAAT CGTCTCGATAATTATAATAAGAAGACCTTACCT…	TATCTCGATATAGAACTGGATTATTATGATTTAGGCGTGGAGTACAGGGACAAAACGGAT GATAAAGTAACCGTGGATTCTGCTCACGCGATTCAAAAATATGGAGTAGGCGTAAAATGT GCGACGATTACTCCTAACCAAGATAGAGTTAAAGAATACAATCTCAAACAAGAATGGAAA TCTCCGAACGGAACCATTCGTTCTATTTTAGACGGAACCGTTTTTCGTAAACCGATCATC GTAAAAAATATTCCTCCTGCGGTTCGTTCTTGGAAAAAACCGATTACAGTAGGACGTCAC GCTTACGGAGATCTTTATAAGGACACAGAACTTTATATTCCCGAAGCCGGAAAGGTGGAA CTCGTTTATACCGGAAAGGACGGAAAAGAAAAA…	ATCTCCGTTGCACTCTTTGCAAGCATTACCGCTTGTGGTGCTTTCGGTGGTCTGCCAAGC CTAAAAAGCTCTTTTGTTCTGAGCGAGGACACAATCCCAGGGACAAACGAAACCGTAAAA ACGTTACTTCCCTACGGATCTGTGATCAACTATTACGGATACGTAAAGCCAGGACAAGCG CCGGACGGTTTAGTCGATGGAAACAAAAAAGCATACTATCTCTATGTTTGGATTCCTGCC GTAATCGCTGAAATGGGAGTTCGTATGATTTCCCCAACAGGCGAAATCGGTGAACCAGGC GACGGAGACTTAGTAAGCGACGCTTTCAAAGCGGCTACCCCAGAAGAAAAATCAATGCCA CATTGGTTTGATACTTGGATCCGTGTAGAAAGA…	GGAAATTGCGCAGCTACAGTCGATGTAGAATATCCGGTATTCCCGAAAGATAAAGAAGGC CGTGCACTTCAGAAATTCCTCGGAACCATTCGTAACGTAGGTTTGGCTGTTGAAGCTCCT AAAAAAAGTCTTTGGGAAGCAATTTTCGGTGAAGGTTCCAGCTTTATCGATCAGATGCCT TCTAAAGTTTTCGAGGCGTTTGACAAAGAATCTTATTACAAACTTACCGACCTAAGCAAA CGTGCAGACGCAATCAACGAAGCAAGTCTTTCTCTTACAGGAATCACTAAAAATAGAGCG AAGATCGGAAATCTGATTGGAGCGGAAGCAATTCTATACATAGGTTACCAAAAACCTTAT ACAGAGTGTAGTACTGAAAATAAAATCGATGCG…	CACGTGGGTAATCTTCCTCTGAGTCTGGGATAACTTTCCGAAAGGGAAGCTAATACTGGA TGGTCCCGAGAGATCACAAGATTTTTCGGGTAAAGATTTATTGCTCGGAGATGAGCCCGC GTCCGATTAGCTAGTTGGTGAGGTAAAGGCTCACCAAGGCGACGATCGGTAGCCGGCCTG AGAGGGTGTTCGGCCACAATGGAACTGAGACACGGTCCATACTCCTACGGGAGGCAGCAG TTAAGAATCTTGCTCAATGGGGGGAACCCTGAAGCAGCGACGCCGCGTGAACGATGAAGG TCTTCGGATTGTAAAGTTCAGTAAGCAGGGAAAAATAAGCAGCAATGTGATGATGGTACC TGCCTAAAGCACCGGCTAACTACGTGCCAGCAG…	ATGCCGATCATTTTTGCTTCGTCTTTGATTTTATTTCCTCAGACGATTATTCAATGGTTA TCTAATAGTAGTCAAGAATGGGCTGGATGGGCAGTGATTATGGATTTTTTTAATCCATTC TCTCAGATTTGGTATCATGCGTTATTTTATTTCGTAATTTATACCGCTTTAATTGTATTC TTTGCTTACTTCTATACAGCGATTCAGTTTAATCCTGCAGAATTGGCTGAGAATTTGAAA AAATACGGTGGATTCATTCCAGGAATTCGTCCGGGTTCTCACACAAAAGAATACATTGAA AAAGTGTTAAATAGAATCACTCTCCCTGGAGCTATGTTTCTTGCAGGTTTGGCATTAGCA CCTTATATTATTATAAAATTCTTAGATTTGAGC…
9	UK6	L.interrogans	Panama	Unknown	CTTTCTATTCCTCAGATTTCTACAGGAGATATTTTACGCGAGGCAGTAAAGAATCAAACT GCGATGGGAATAGAAGCAAAACGTTATATGGATGCGGGAGACTTGGTTCCAGATTCCGTA GTGATTGGAATCATAAAAGATCGCATTCGAGAAGCGGATTGTAAAAATGGATTTTTGTTG GATGGATTTCCGAGAACCGTGGAACAAGCGGAAGCTTTAGATACACTTTTAAAAAATGAA GGCAAGTCTATTGATAAAGCGATTAATCTTCAGGTTCCGGATGCGGAACTCTTAAAGAGA TTACTCGGCCGTGCAGAAATAGAAGGTCGCGCGGACGATAACGAAGTGACGATTAAAAAT CGTCTCGATAATTATAATAAGAAGACCTTACCT…	TATCTCGATATAGAACTGGATTATTATGATTTAGGCGTGGAGTACAGGGACAAAACGGAT GATAAAGTAACCGTGGATTCTGCTCACGCGATTCAAAAATATGGAGTAGGCGTAAAATGT GCGACGATTACTCCTAACCAAGATAGAGTTAAAGAATACAATCTCAAACAAGAATGGAAA TCTCCGAACGGAACCATTCGTTCTATTTTAGACGGAACCGTTTTTCGTAAACCGATCATC GTAAAAAATATTCCTCCTGCGGTTCGTTCTTGGAAAAAACCGATTACAGTAGGACGTCAC GCTTACGGAGATCTTTATAAGGACACAGAACTTTATATTCCCGAAGCCGGAAAGGTGGAA CTCGTTTATACCGGAAAGGACGGAAAAGAAAAA…	ATCTCCGTTGCACTCTTTGCAAGCATTACCGCTTGTGGTGCTTTCGGTGGTCTGCCAAGC CTAAAAAGCTCTTTTGTTCTGAGCGAGGACACAATCCCAGGGACAAACGAAACCGTAAAA ACGTTACTTCCCTACGGATCTGTGATCAACTATTACGGATACGTAAAGCCAGGACAAGCG CCGGACGGTTTAGTCGATGGAAACAAAAAAGCATACTATCTCTATGTTTGGATTCCTGCC GTAATCGCTGAAATGGGAGTTCGTATGATTTCCCCAACAGGCGAAATCGGTGAACCAGGC GACGGAGACTTAGTAAGCGACGCTTTCAAAGCGGCTACCCCAGAAGAAAAATCAATGCCA CATTGGTTTGATACTTGGATCCGTGTAGAAAGA…	GGAAATTGCGCAGCTACAGTCGATGTAGAATATCCGGTATTCCCGAAAGATAAAGAAGGC CGTGCACTTCAGAAATTCCTCGGAACCATTCGTAACGTAGGTTTGGCTGTTGAAGCTCCT AAAAAAAGTCTTTGGGAAGCAATTTTCGGTGAAGGTTCCAGCTTTATCGATCAGATGCCT TCTAAAGTTTTCGAGGCGTTTGACAAAGAATCTTATTACAAACTTACCGACCTGAGTAAA CGTGCAGACGCAATCAACGAAGCAAGTCTTTCTCTTACAGGAATCACTAAAAATAGAGCG AAGATCGGAAATCTGATTGGAGCGGAAGCAATTCTATACATAGGTTACCAAAAACCTTAT ACAGAGTGTAGTACTGAAAATAAAATCGATGCA…	CACGTGGGTAATCTTCCTCTGAGTCTGGGATAACTTTCCGAAAGGGAAGCTAATACTGGA TGGTCCCGAGAGATCATAAGATTTTTCGGGTAAAGATTTATTGCTCGGAGATGAGCCCGC GTCCGATTAGCTAGTTGGTGAGGTAAAGGCTCACCAAGGCGACGATCGGTAGCCGGCCTG AGAGGGTGTTCGGCCACAATGGAACTGAGACACGGTCCATACTCCTACGGGAGGCAGCAG TTAAGAATCTTGCTCAATGGGGGGAACCCTGAAGCAGCGACGCCGCGTGAACGATGAAGG TCTTCGGATTGTAAAGTTCAGTAAGCAGGGAAAAATAAGCAGCAATGTGATGATGGTACC TGCCTAAAGCACCGGCTAACTACGTGCCAGCAG…	ATGCCGATCATTTTTGCTTCGTCTTTGATTTTATTTCCTCAGACGATTATTCAATGGTTA TCTAATAGTAGTCAAGAATGGGCTGGATGGGCAGTGATTATGGATTTTTTTAATCCATTC TCTCAGATTTGGTATCATGCGTTATTTTATTTCGTAATTTATACCGCTTTAATTGTATTC TTTGCTTACTTTTATACAGCGATTCAGTTTAATCCTGCAGAATTGGCTGAGAATTTGAAA AAATACGGTGGATTCATTCCAGGAATTCGTCCGGGTTCTCACACAAAAGAATATATTGAA AAAGTGTTAAATAGAATCACTCTTCCCGGAGCTATGTTTCTTGCAGGTTTGGCATTAGCA CCTTATATTATTATAAAATTCTTAGATTTGAGC…
10	UK7	L.interrogans	USA	Unknown	CTTTCTATTCCTCAGATTTCTACAGGAGATATTTTACGCGAGGCAGTAAAGAATCAAACT GCGATGGGAATAGAAGCAAAACGTTATATGGATGCGGGAGATTTGGTTCCAGATTCCGTA GTGATTGGAATCATAAAAGATCGCATTCGAGAAGCGGATTGTAAAAATGGATTTTTGTTG GATGGATTTCCGAGAACCGTGGAACAAGCGGAAGCTTTAGATACACTTTTAAAAAATGAA GGCAAGTCTATTGATAAAGCGATTAATCTTCAGGTTCCGGATGCGGAACTCTTAAAGAGA TTACTCGGCCGTGCAGAAATAGAAGGTCGCGCGGACGATAACGAAGTGACGATTAAAAAT CGTCTCGATAATTATAATAAGAAGACCTTACCT…	TATCTCGATATAGAACTGGATTATTATGATTTAGGCGTGGAGTACAGGGACAAAACGGAT GATAAAGTAACCGTGGATTCTGCTCACGCGATTCAAAAATATGGAGTAGGCGTAAAATGT GCGACGATTACTCCTAACCAAGATAGAGTTAAAGAATACAATCTCAAACAAGAATGGAAA TCTCCGAACGGAACCATTCGTTCTATTTTAGACGGAACCGTTTTTCGTAAACCGATCATC GTAAAAAATATTCCTCCTGCGGTTCGTTCTTGGAAAAAACCGATTACAGTAGGACGTCAC GCTTACGGAGATCTTTATAAGGACACAGAACTTTATATTCCCGAAGCCGGAAAGGTGGAA CTCGTTTATACCGGAAAGGACGGAAAAGAAAAA…	ATCTCCGTTGCACTCTTTGCAAGCATTACCGCTTGTGGTGCTTTCGGTGGTCTGCCAAGC CTAAAAAGCTCTTTTGTTCTGAGCGAGGACACAATCCCAGGGACAAACGAAACCGTAAAA ACGTTACTTCCCTACGGATCTGTGATCAACTATTACGGATACGTAAAGCCAGGACAAGCG CCGGACGGTTTAGTCGATGGAAACAAAAAAGCATACTATCTCTATGTTTGGATTCCTGCC GTAATCGCTGAAATGGGAGTTCGTATGATTTCCCCAACAGGCGAAATCGGTGAACCAGGC GACGGAGACTTAGTAAGCGACGCTTTCAAAGCGGCTACCCCAGAAGAAAAATCAATGCCA CATTGGTTTGATACTTGGATCCGTGTAGAAAGA…	GGAAATTGCGCAGCTACAGTCGATGTAGAATATCCGGTATTCCCGAAAGATAAAGAAGGC CGTGCACTTCAGAAATTCCTCGGAACCATTCGTAACGTAGGTTTGGCTGTTGAAGCTCCT AAAAAAAGTCTTTGGGAAGCAATTTTCGGTGAAGGTTCCAGCTTTATCGATCAGATGCCT TCTAAAGTTTTCGAGGCGTTTGACAAAGAATCTTATTACAAACTTACCGACCTAAGCAAA CGTGCAGACGCAATCAACGAAGCAAGTCTTTCTCTTACAGGAATCACTAAAAATAGAGCG AAGATCGGAAATCTGATTGGAGCGGAAGCAATTCTATACATAGGTTACCAAAAACCTTAT ACAGAGTGTAGTACTGAAAATAAAATCGATGCG…	CACGTGGGTAATCTTCCTCTGAGTCTGGGATAACTTTCCGAAAGGGAAGCTAATACTGGA TGGTCCCGAGAGATCACAAGATTTTTCGGGTAAAGATTTATTGCTCGGAGATGAGCCCGC GTCCGATTAGCTAGTTGGTGAGGTAAAGGCTCACCAAGGCGACGATCGGTAGCCGGCCTG AGAGGGTGTTCGGCCACAATGGAACTGAGACACGGTCCATACTCCTACGGGAGGCAGCAG TTAAGAATCTTGCTCAATGGGGGGAACCCTGAAGCAGCGACGCCGCGTGAACGATGAAGG TCTTCGGATTGTAAAGTTCAGTAAGCAGGGAAAAATAAGCAGCAATGTGATGATGGTACC TGCCTAAAGCACCGGCTAACTACGTGCCAGCAG…	ATGCCGATCATTTTTGCTTCGTCTTTGATTTTATTTCCTCAGACGATTATTCAATGGTTA TCTAATAGTAGTCAAGAATGGGCTGGATGGGCAGTGATTATGGATTTTTTTAATCCATTC TCTCAGATTTGGTATCATGCGTTATTTTATTTCGTAATTTATACCGCTTTAATTGTATTC TTTGCTTACTTCTATACAGCGATTCAGTTTAATCCTGCAGAATTGGCTGAGAATTTGAAA AAATACGGTGGATTCATTCCAGGAATTCGTCCGGGTTCTCACACAAAAGAATACATTGAA AAAGTGTTAAATAGAATCACTCTCCCTGGAGCTATGTTTCTTGCAGGTTTGGCATTAGCA CCTTATATTATTATAAAATTCTTAGATTTGAGC…
11	UK9	L.interrogans	Russia	Unknown	CTTTCTATTCCTCAGATTTCTACAGGAGATATTTTACGCGAGGCAGTAAAGAATCAAACT GCGATGGGAATAGAAGCAAAACGTTATATGGATGCGGGAGACTTGGTTCCAGATTCCGTA GTGATTGGAATCATAAAAGATCGCATTCGAGAAGCGGATTGTAAAAATGGATTTTTGTTG GATGGATTTCCGAGAACCGTGGAACAAGCGGAAGCTTTAGATACACTTTTAAAAAATGAA GGCAAGTCTATTGATAAAGCGATTAATCTTCAGGTTCCGGATGCGGAACTCTTAAAGAGA TTACTCGGCCGTGCAGAAATAGAAGGTCGCGCGGACGATAACGAAGTGACGATTAAAAAT CGTCTCGATAATTATAATAAGAAGACCTTACCT…	TATCTCGATATAGAACTGGATTATTATGATTTAGGCGTGGAGTACAGGGACAAAACGGAT GATAAAGTAACCGTGGATTCTGCTCACGCGATTCAAAAATATGGAGTAGGCGTAAAATGT GCGACGATTACTCCTAACCAAGATAGAGTTAAAGAATACAATCTCAAACAAGAATGGAAA TCTCCGAACGGAACCATTCGTTCTATTTTAGACGGAACCGTTTTTCGTAAACCGATCATC GTAAAAAATATTCCTCCTGCGGTTCGTTCTTGGAAAAAACCGATTACAGTAGGACGTCAC GCTTACGGAGATCTTTATAAGGACACAGAACTTTATATTCCCGAAGCCGGAAAGGTGGAA CTCGTTTATACCGGAAAGGACGGAAAAGAAAAA…	ATCTCCGTTGCACTCTTTGCAAGCATTACCGCTTGTGGTGCTTTCGGTGGTCTGCCAAGC CTAAAAAGCTCTTTTGTTCTGAGCGAGGACACAATCCCAGGGACAAACGAAACCGTAAAA ACGTTACTTCCCTACGGATCTGTGATCAACTATTACGGATACGTAAAGCCAGGACAAGCG CCGGACGGTTTAGTCGATGGAAACAAAAAAGCATACTATCTCTATGTTTGGATTCCTGCC GTAATCGCTGAAATGGGAGTTCGTATGATTTCCCCAACAGGCGAAATCGGTGAACCAGGC GACGGAGACTTAGTAAGCGACGCTTTCAAAGCGGCTACCCCAGAAGAAAAATCAATGCCA CATTGGTTTGATACTTGGATCCGTGTAGAAAGA…	GGAAATTGCGCAGCTACAGTCGATGTAGAATATCCGGTATTCCCGAAAGATAAAGAAGGC CGTGCACTTCAGAAATTCCTCGGAACCATTCGTAACGTAGGTTTGGCCGTTGAAGCTCCT AAAAAAAGTCTTTGGGAAGCAATTTTCGGTGAAGGTTCCAGCTTTATCGATCAGATGCCT TCTAAAGTTTTCGAGGCGTTTGACAAAGAATCTTATTACAAACTTACCGACCTAAGCAAA CGTGCAGACGCAATCAACGAAGCAAGTCTTTCTCTTACAGGAATCACTAAAAATAGAGCG AAGATCGGAAATCTGATTGGAGCGGAAGCAATTCTATACATAGGTTACCAAAAACCTTAT ACAGAGTGTAGTACTGAAAATAAAATCGATGCG…	CACGTGGGTAATCTTCCTCTGAGTCTGGGATAACTTTCCGAAAGGGAAGCTAATACTGGA TGGTCCCGAGAGATCACAAGATTTTTCGGGTAAAGATTTATTGCTCGGAGATGAGCCCGC GTCCGATTAGCTAGTTGGTGAGGTAAAGGCTCACCAAGGCGACGATCGGTAGCCGGCCTG AGAGGGTGTTCGGCCACAATGGAACTGAGACACGGTCCATACTCCTACGGGAGGCAGCAG TTAAGAATCTTGCTCAATGGGGGGAACCCTGAAGCAGCGACGCCGCGTGAACGATGAAGG TCTTCGGATTGTAAAGTTCAGTAAGCAGGGAAAAATAAGCAGCAATGTGATGATGGTACC TGCCTAAAGCACCGGCTAACTACGTGCCAGCAG…	ATGCCGATCATTTTTGCTTCGTCTTTGATTTTATTTCCTCAGACGATTATTCAATGGTTA TCTAATAGTAGTCAAGAATGGGCTGGATGGGCAGTGATTATGGATTTTTTTAATCCATTC TCTCAGATTTGGTATCATGCGTTATTTTATTTCGTAATTTATACCGCTTTAATTGTATTC TTTGCTTACTTTTATACAGCGATTCAGTTTAATCCTGCAGAATTGGCTGAGAATTTGAAA AAATACGGTGGATTCATTCCAGGAATTCGTCCGGGTTCTCACACAAAAGAATATATTGAA AAAGTGTTAAATAGAATCACTCTTCCCGGAGCTATGTTTCTTGCAGGTTTGGCATTAGCA CCTTATATTATTATAAAATTCTTAGATTTGAGC…
12	UK10	L.interrogans	Malaysia	Unknown	CTTTCTATTCCTCAGATTTCTACAGGAGATATTTTACGCGAGGCAGTAAAGAATCAAACT GCGATGGGAATAGAAGCAAAACGTTATATGGATGCGGGAGATTTGGTTCCAGATTCCGTA GTGATTGGAATCATAAAAGATCGCATTCGAGAAGCGGATTGTAAAAATGGATTTTTGTTG GATGGATTTCCGAGAACCGTGGAACAAGCGGAAGCTTTAGATACACTTTTAAAAAATGAA GGCAAGTCTATTGATAAAGCGATTAATCTTCAGGTTCCGGATGCGGAACTCTTAAAGAGA TTACTCGGCCGTGCAGAAATAGAAGGTCGCGCGGACGATAACGAAGTGACGATTAAAAAT CGTCTCGATAATTATAATAAGAAGACCTTACCT…	TATCTCGATATAGAACTGGATTATTATGATTTAGGCGTGGAGTACAGGGACAAAACGGAT GATAAAGTAACCGTGGATTCTGCTCACGCGATTCAAAAATATGGAGTAGGCGTAAAATGT GCGACGATTACTCCTAACCAAGATAGAGTTAAAGAATACAATCTCAAACAAGAATGGAAA TCTCCGAACGGAACCATTCGTTCTATTTTAGACGGAACCGTTTTTCGTAAACCGATCATC GTAAAAAATATTCCTCCTGCGGTTCGTTCTTGGAAAAAACCGATTACAGTAGGACGTCAC GCTTACGGAGATCTTTATAAGGACACAGAACTTTATATTCCCGAAGCCGGAAAGGTGGAA CTCGTTTATACCGGAAAGGACGGAAAAGAAAAA…	ATCTCCGTTGCACTCTTTGCAAGCATTACCGCTTGTGGTGCTTTCGGTGGTCTGCCAAGC CTAAAAAGCTCTTTTGTTCTGAGCGAGGACACAATCCCAGGGACAAACGAAACCGTAAAA ACGTTACTTCCCTACGGATCTGTGATCAACTATTACGGATACGTAAAGCCAGGACAAGCG CCGGACGGTTTAGTCGATGGAAACAAAAAAGCATACTATCTCTATGTTTGGATTCCTGCC GTAATCGCTGAAATGGGAGTTCGTATGATTTCCCCAACAGGCGAAATCGGTGAGCCAGGC GACGGAGACTTAGTAAGCGACGCTTTCAAAGCGGCTACCCCAGAAGAAAAATCAATGCCA CATTGGTTTGATACTTGGATCCGTGTAGAAAGA…	GGAAATTGCGCAGCTACAGTCGATGTAGAATATCCGGTATTCCCGAAAGATAAAGAAGGC CGTGCACTTCAGAAATTCCTCGGAACCATTCGTAACGTAGGTTTGGCTGTTGAAGCTCCT AAAAAAAGTCTTTGGGAAGCAATTTTCGGTGAAGGTTCCAGCTTTATCGATCAGATGCCT TCTAAAGTTTTCGAGGCGTTTGACAAAGAATCTTATTACAAACTTACCGACCTGAGTAAA CGTGCAGACGCAATCAACGAAGCAAGTCTTTCTCTTACAGGAATCACTAAAAATAGAGCG AAGATCGGAAATCTGATTGGAGCGGAAGCAATTCTATACATAGGTTACCAAAAACCTTAT ACAGAGTGTAGTACTGAAAATAAAATCGATGCA…	CACGTGGGTAATCTTCCTCTGAGTCTGGGATAACTTTCCGAAAGGGAAGCTAATACTGGA TGGTCCCGAGAGATCATAAGATTTTTCGGGTAAAGATTTATTGCTCGGAGATGAGCCCGC GTCCGATTAGCTAGTTGGTGAGGTAAAGGCTCACCAAGGCGACGATCGGTAGCCGGCCTG AGAGGGTGTTCGGCCACAATGGAACTGAGACACGGTCCATACTCCTACGGGAGGCAGCAG TTAAGAATCTTGCTCAATGGGGGGAACCCTGAAGCAGCGACGCCGCGTGAACGATGAAGG TCTTCGGATTGTAAAGTTCAGTAAGCAGGGAAAAATAAGCAGCAATGTGATGATGGTACC TGCCTAAAGCACCGGCTAACTACGTGCCAGCAG…	ATGCCGATCATTTTTGCTTCCTCTTTGATTTTGTTTCCGCAAACGATCATTCAATGGTTA TCCAATAGTAGTCAAGAATGGGCTGGATGGGCAGTGATTATGGATTTTTTCAATCCATTC TCTCAGATTTGGTACCACGCGTTGTTTTATTTTGTGATCTATACCACTTTGATTATATTC TTTGCATATTTTTATACTGCGATTCAGTTTAACCCTGCGGAGTTGGCTGAGAATCTGAAA AAATACGGCGGATTTATCCCAGGAATTCGCCCCGGTTCTCATACAAAAGAATACATCGAA AAAGTGTTAAATAGAATCACCCTTCCTGGAGCCATGTTTCTTGCCGGTTTGGCATTAGCA CCTTATATTATTATAAAATTCTTAGATTTGAGC…
13	UK16	L.interrogans	Unknown	Unknown	CTTTCTATTCCTCAGATTTCTACAGGAGATATTTTACGCGAGGCAGTAAAGAATCAAACT GCGATGGGAATAGAAGCAAAACGTTATATGGATGCGGGAGATTTGGTTCCAGATTCCGTA GTGATTGGAATCATAAAAGATCGCATTCGAGAAGCGGATTGTAAAAATGGATTTTTGTTG GATGGATTTCCGAGAACCGTGGAACAAGCGGAAGCTTTAGATACACTTTTAAAAAATGAA GGCAAGTCTATTGATAAAGCGATTAATCTTCAGGTTCCGGATGCGGAACTCTTAAAGAGA TTACTCGGCCGTGCAGAAATAGAAGGTCGCGCGGACGATAACGAAGTGACGATTAAAAAT CGTCTCGATAATTATAATAAGAAGACCTTACCT…	TATCTCGATATAGAACTGGATTATTATGATTTAGGCGTGGAGTACAGAGACAAAACGGAT GATAAAGTAACTGTGGATTCTGCTCACGCGATTCAAAAATATGGAGTAGGCGTAAAATGT GCGACGATTACTCCTAACCAAGATAGAGTTAAAGAATACAATCTCAAACAAGAATGGAAA TCTCCGAACGGAACCATTCGTTCTATTTTAGACGGAACCGTTTTTCGTAAACCGATCATC GTAAAAAATATTCCTCCTGCGGTTCGTTCTTGGAAAAAACCGATTACAGTAGGACGTCAC GCTTACGGAGATCTTTATAAGGACACAGAACTTTATATTCCCGAAGCCGGAAAGGTGGAA CTCGTTTATACCGGAAAGGACGGAAAAGAAAAA…	ATCTCCGTTGCACTCTTTGCAAGCATTACCGCTTGTGGTGCTTTCGGTGGTCTGCCAAGC CTAAAAAGCTCTTTTGTTCTGAGCGAGGACACAATCCCAGGGACAAACGAAACCGTAAAA ACGTTACTTCCCTACGGATCTGTGATCAACTATTACGGATACGTAAAGCCAGGACAAGCG CCGGACGGTTTAGTCGATGGAAACAAAAAAGCATACTATCTCTATGTTTGGATTCCTGCC GTAATCGCTGAAATGGGAGTTCGTATGATTTCCCCAACAGGCGAAATCGGTGAACCAGGC GACGGAGACTTAGTAAGCGACGCTTTCAAAGCGGCTACCCCAGAAGAAAAATCAATGCCA CATTGGTTTGATACTTGGATCCGTGTAGAAAGA…	GGAAATTGCGCAGCTACAGTCGATGTAGAATATCCGGTATTCCCGAAAGATAAAGAAGGC CGTGCACTTCAGAAATTCCTCGGAACCATTCGTAACGTAGGTTTGGCCGTTGAAGCTCCT AAAAAAAGTCTTTGGGAAGCAATTTTCGGTGAAGGTTCCAGCTTTATCGATCAGATGCCT TCTAAAGTTTTCGAGGCGTTTGACAAAGAATCTTATTACAAACTTACCGACCTAAGCAAA CGTGCAGACGCAATCAACGAAGCAAGTCTTTCTCTTACAGGAATCACTAAAAATAGAGCG AAGATCGGAAATCTGATTGGAGCGGAAGCAATTCTATACATAGGTTACCAAAAACCTTAT ACAGAGTGTAGTACTGAAAATAAAATCGATGCG…	CACGTGGGTAATCTTCCTCTGAGTCTGGGATAACTTTCCGAAAGGGAAGCTAATACTGGA TGGTCCCGAGAGATCACAAGATTTTTCGGGTAAAGATTTATTGCTCGGAGATGAGCCCGC GTCCGATTAGCTAGTTGGTGAGGTAAAGGCTCACCAAGGCGACGATCGGTAGCCGGCCTG AGAGGGTGTTCGGCCACAATGGAACTGAGACACGGTCCATACTCCTACGGGAGGCAGCAG TTAAGAATCTTGCTCAATGGGGGGAACCCTGAAGCAGCGACGCCGCGTGAACGATGAAGG TCTTCGGATTGTAAAGTTCAGTAAGCAGGGAAAAATAAGCAGCAATGTGATGATGGTACC TGCCTAAAGCACCGGCTAACTACGTGCCAGCAG…	ATGCCGATCATTTTTGCTTCGTCTTTGATTTTATTTCCTCAGACGATTATTCAATGGTTA TCTAATAGTAGTCAAGAATGGGCTGGATGGGCAGTGATTATGGATTTTTTTAATCCATTC TCTCAGATTTGGTATCACGCGTTATTTTATTTCGTAATTTATACCGCTTTAATTGTATTC TTTGCTTACTTCTATACAGCGATTCAGTTTAATCCTGCAGAATTGGCTGAGAATTTGAAA AAATACGGTGGATTCATTCCAGGAATTCGTCCGGGTTCTCACACAAAAGAATACATTGAA AAAGTGTTAAATAGAATCACTCTCCCTGGAGCTATGTTTCTTGCAGGTTTGGCATTAGCA CCTTATATTATTATAAAATTCTTAGATTTGAGC…
14	UK17	L.interrogans	Romania	Unknown	CTTTCTATTCCTCAGATTTCTACAGGAGATATTTTACGCGAGGCAGTAAAGAATCAAACT GCGATGGGAATAGAAGCAAAACGTTATATGGATGCGGGAGATTTGGTTCCAGATTCCGTA GTGATTGGAATCATAAAAGATCGCATTCGAGAAGCGGATTGTAAAAATGGATTTTTGTTG GATGGATTTCCGAGAACCGTGGAACAAGCGGAAGCTTTAGATACACTTTTAAAAAATGAA GGCAAGTCTATTGATAAAGCGATTAATCTTCAGGTTCCGGATGCGGAACTCTTAAAGAGA TTACTCGGCCGTGCAGAAATAGAAGGTCGCGCGGACGATAACGAAGTGACGATTAAAAAT CGTCTCGATAATTATAATAAGAAGACCTTACCT…	TATCTCGATATAGAACTGGATTATTATGATTTAGGCGTGGAGTACAGGGACAAAACGGAT GATAAAGTAACCGTGGATTCTGCTCACGCGATTCAAAAATATGGAGTAGGCGTAAAATGT GCGACGATTACTCCTAACCAAGATAGAGTTAAAGAATACAATCTCAAACAAGAATGGAAA TCTCCGAACGGAACCATTCGTTCTATTTTAGACGGAACCGTTTTTCGTAAACCGATCATC GTAAAAAATATTCCTCCTGCGGTTCGTTCTTGGAAAAAACCGATTACAGTAGGACGTCAC GCTTACGGAGATCTTTATAAGGACACAGAACTTTATATTCCCGAAGCCGGAAAGGTGGAA CTCGTTTATACCGGAAAGGACGGAAAAGAAAAA…	ATCTCCGTTGCACTCTTTGCAAGCATTACCGCTTGTGGTGCTTTCGGTGGTCTGCCAAGC CTAAAAAGCTCTTTTGTTCTGAGCGAGGACACAATCCCAGGGACAAACGAAACCGTAAAA ACGTTACTTCCCTACGGATCTGTGATCAACTATTACGGATACGTAAAGCCAGGACAAGCG CCGGACGGTTTAGTCGATGGAAACAAAAAAGCATACTATCTCTATGTTTGGATTCCTGCC GTAATCGCTGAAATGGGAGTTCGTATGATTTCCCCAACAGGCGAAATCGGTGAGCCAGGC GACGGAGACTTAGTAAGCGACGCTTTCAAAGCGGCTACCCCAGAAGAAAAATCAATGCCA CATTGGTTTGATACTTGGATCCGTGTAGAAAGA…	GGAAATTGCGCAGCTACAGTCGATGTAGAATATCCGGTATTCCCGAAAGATAAAGAAGGC CGTGCACTTCAGAAATTCCTCGGAACCATTCGTAACGTAGGTTTGGCTGTTGAAGCTCCT AAAAAAAGTCTTTGGGAAGCAATTTTCGGTGAAGGTTCCAGCTTTATCGATCAGATGCCT TCTAAAGTTTTCGAGGCGTTTGACAAAGAATCTTATTACAAACTTACCGACCTGAGTAAA CGTGCAGACGCAATCAACGAAGCAAGTCTTTCTCTTACAGGAATCACTAAAAATAGAGCG AAGATCGGAAATCTGATTGGAGCGGAAGCAATTCTATACATAGGTTACCAAAAACCTTAT ACAGAGTGTAGTACTGAAAATAAAATCGATGCG…	CACGTGGGTAATCTTCCTCTGAGTCTGGGATAACTTTCCGAAAGGGAAGCTAATACTGGA TGGTCCCGAGAGATCATAAGATTTTTCGGGTAAAGATTTATTGCTCGGAGATGAGCCCGC GTCCGATTAGCTAGTTGGTGAGGTAAAGGCTCACCAAGGCGACGATCGGTAGCCGGCCTG AGAGGGTGTTCGGCCACAATGGAACTGAGACACGGTCCATACTCCTACGGGAGGCAGCAG TTAAGAATCTTGCTCAATGGGGGGAACCCTGAAGCAGCGACGCCGCGTGAACGATGAAGG TCTTCGGATTGTAAAGTTCAGTAAGCAGGGAAAAATAAGCAGCAATGTGATGATGGTACC TGCCTAAAGCACCGGCTAACTACGTGCCAGCAG…	ATGCCGATCATTTTTGCTTCGTCTTTGATTTTATTTCCTCAGACGATTATTCAATGGTTA TCTAATAGTAGTCAAGAATGGGCTGGATGGGCAGTGATTATGGATTTTTTTAATCCATTC TCTCAGATTTGGTATCATGCGTTATTTTATTTCGTAATTTATACCGCTTTAATTGTATTC TTTGCTTACTTTTATACAGCGATTCAGTTTAATCCTGCAGAATTGGCTGAGAATTTGAAA AAATACGGTGGGTTCATTCCAGGAATTCGTCCGGGTTCTCACACAAAAGAATACATTGAA AAAGTGTTAAATAGAATCACTCTTCCCGGAGCTATGTTTCTTGCAGGTTTGGCATTAGCA CCTTATATTATTATAAAATTCTTAGATTTGAGC…
15	UK18	L.interrogans	Denmark	Unknown	CTTTCTATTCCTCAGATTTCTACAGGAGATATTTTACGCGAGGCAGTAAAGAATCAAACT GCGATGGGAATAGAAGCAAAACGTTATATGGATGCGGGAGATTTGGTTCCAGATTCCGTA GTGATTGGAATCATAAAAGATCGCATTCGAGAAGCGGATTGTAAAAATGGATTTTTGTTG GATGGATTTCCGAGAACCGTGGAACAAGCGGAAGCTTTAGATACACTTTTAAAAAATGAA GGCAAGTCTATTGATAAAGCGATTAATCTTCAGGTTCCGGATGCGGAACTCTTAAAGAGA TTACTCGGCCGTGCAGAAATAGAAGGTCGCGCGGACGATAACGAAGTGACGATTAAAAAT CGTCTCGATAATTATAATAAGAAGACCTTACCT…	TATCTCGATATAGAACTGGATTATTATGATTTAGGCGTGGAGTACAGAGACAAAACGGAT GATAAAGTAACTGTGGATTCTGCTCACGCGATTCAAAAATATGGAGTAGGCGTAAAATGT GCGACGATTACTCCTAACCAAGATAGAGTTAAAGAATACAATCTCAAACAAGAATGGAAA TCTCCGAACGGAACCATTCGTTCTATTTTAGACGGAACCGTTTTTCGTAAACCGATCATC GTAAAAAATATTCCTCCTGCGGTTCGTTCTTGGAAAAAACCGATTACAGTAGGACGTCAC GCTTACGGAGATCTTTATAAGGACACAGAACTTTATATTCCCGAAGCCGGAAAGGTGGAA CTCGTTTATACCGGAAAGGACGGAAAAGAAAAA…	ATCTCCGTTGCACTCTTTGCAAGCATTACCGCTTGTGGTGCTTTCGGTGGTCTGCCAAGC CTAAAAAGCTCTTTTGTTCTGAGCGAGGACACAATCCCAGGGACAAACGAAACCGTAAAA ACGTTACTTCCCTACGGATCTGTGATCAACTATTACGGATACGTAAAGCCAGGACAAGCG CCGGACGGTTTAGTCGATGGAAACAAAAAAGCATACTATCTCTATGTTTGGATTCCTGCC GTAATCGCTGAAATGGGAGTTCGTATGATTTCCCCAACAGGCGAAATCGGTGAACCAGGC GACGGAGACTTAGTAAGCGACGCTTTCAAAGCGGCTACCCCAGAAGAAAAATCAATGCCA CATTGGTTTGATACTTGGATCCGTGTAGAAAGA…	GGAAATTGCGCAGCTACAGTCGATGTAGAATATCCGGTATTCCCGAAAGATAAAGAAGGC CGTGCACTTCAGAAATTCCTCGGAACCATTCGTAACGTAGGTTTGGCCGTTGAAGCTCCT AAAAAAAGTCTTTGGGAAGCAATTTTCGGTGAAGGTTCCAGCTTTATCGATCAGATGCCT TCTAAAGTTTTCGAGGCGTTTGACAAAGAATCTTATTACAAACTTACCGACCTAAGCAAA CGTGCAGACGCAATCAACGAAGCAAGTCTTTCTCTTACAGGAATCACTAAAAATAGAGCG AAGATCGGAAATCTGATTGGAGCGGAAGCAATTCTATACATAGGTTACCAAAAACCTTAT ACAGAGTGTAGTACTGAAAATAAAATCGATGCG…	CACGTGGGTAATCTTCCTCTGAGTCTGGGATAACTTTCCGAAAGGGAAGCTAATACTGGA TGGTCCCGAGAGATCACAAGATTTTTCGGGTAAAGATTTATTGCTCGGAGATGAGCCCGC GTCCGATTAGCTAGTTGGTGAGGTAAAGGCTCACCAAGGCGACGATCGGTAGCCGGCCTG AGAGGGTGTTCGGCCACAATGGAACTGAGACACGGTCCATACTCCTACGGGAGGCAGCAG TTAAGAATCTTGCTCAATGGGGGGAACCCTGAAGCAGCGACGCCGCGTGAACGATGAAGG TCTTCGGATTGTAAAGTTCAGTAAGCAGGGAAAAATAAGCAGCAATGTGATGATGGTACC TGCCTAAAGCACCGGCTAACTACGTGCCAGCAG…	ATGCCGATCATTTTTGCTTCGTCTTTGATTTTATTTCCTCAGACGATTATTCAATGGTTA TCTAATAGTAGTCAAGAATGGGCTGGATGGGCAGTGATTATGGATTTTTTTAATCCATTC TCTCAGATTTGGTATCACGCGTTATTTTATTTCGTAATTTATACCGCTTTAATTGTATTC TTTGCTTACTTCTATACAGCGATTCAGTTTAATCCTGCAGAATTGGCTGAGAATTTGAAA AAATACGGTGGATTCATTCCAGGAATTCGTCCGGGTTCTCACACAAAAGAATACATTGAA AAAGTGTTAAATAGAATCACTCTCCCTGGAGCTATGTTTCTTGCAGGTTTGGCATTAGCA CCTTATATTATTATAAAATTCTTAGATTTGAGC…
16	UK19	L.interrogans	Indonesia	Unknown	CTTTCTATTCCTCAGATTTCTACAGGAGATATTTTACGCGAGGCAGTAAAGAATCAAACT GCGATGGGAATAGAAGCAAAACGTTATATGGATGCGGGAGATTTGGTTCCAGATTCCGTA GTGATTGGAATCATAAAAGATCGCATTCGAGAAGCGGATTGTAAAAATGGATTTTTGTTG GATGGATTTCCGAGAACCGTGGAACAAGCGGAAGCTTTAGATACACTTTTAAAAAATGAA GGCAAGTCTATTGATAAAGCGATTAATCTTCAGGTTCCGGATGCGGAACTCTTAAAGAGA TTACTCGGCCGTGCAGAAATAGAAGGTCGCGCGGACGATAACGAAGTGACGATTAAAAAT CGTCTCGATAATTATAATAAGAAGACCTTACCT…	TATCTCGATATAGAACTGGATTATTATGATTTAGGCGTGGAGTACAGGGACAAAACGGAT GATAAAGTAACCGTGGATTCTGCTCACGCGATTCAAAAATATGGAGTAGGCGTAAAATGT GCGACGATTACTCCTAACCAAGATAGAGTTAAAGAATACAATCTCAAACAAGAATGGAAA TCTCCGAACGGAACCATTCGTTCTATTTTAGACGGAACCGTTTTTCGTAAACCGATCATC GTAAAAAATATTCCTCCTGCGGTTCGTTCTTGGAAAAAACCGATTACAGTAGGACGTCAC GCTTACGGAGATCTTTATAAGGACACAGAACTTTATATTCCCGAAGCCGGAAAGGTGGAA CTCGTTTATACCGGAAAGGACGGAAAAGAAAAA…	ATCTCCGTTGCACTCTTTGCAAGCATTACCGCTTGTGGTGCTTTCGGTGGTCTGCCAAGC CTAAAAAGCTCTTTTGTTCTGAGCGAGGACACAATCCCAGGGACAAACGAAACCGTAAAA ACGTTACTTCCCTACGGATCTGTGATCAACTATTACGGATACGTAAAGCCAGGACAAGCG CCGGACGGTTTAGTCGATGGAAACAAAAAAGCATACTATCTCTATGTTTGGATTCCTGCC GTAATCGCTGAAATGGGAGTTCGTATGATTTCCCCAACAGGCGAAATCGGTGAGCCAGGC GACGGAGACTTAGTAAGCGACGCTTTCAAAGCGGCTACCCCAGAAGAAAAATCAATGCCA CATTGGTTTGATACTTGGATCCGTGTAGAAAGA…	GGAAATTGCGCAGCTACAGTCGATGTAGAATATCCGGTATTCCCGAAAGATAAAGAAGGC CGTGCACTTCAGAAATTCCTCGGAACCATTCGTAACGTAGGTTTGGCTGTTGAAGCTCCT AAAAAAAGTCTTTGGGAAGCAATTTTCGGTGAAGGTTCCAGCTTTATCGATCAGATGCCT TCTAAAGTTTTCGAGGCGTTTGACAAAGAATCTTATTACAAACTTACCGACCTGAGTAAA CGTGCAGACGCAATCAACGAAGCAAGTCTTTCTCTTACAGGAATCACTAAAAATAGAGCG AAGATCGGAAATCTGATTGGAGCGGAAGCAATTCTATACATAGGTTACCAAAAACCTTAT ACAGAGTGTAGTACTGAAAATAAAATCGATGCG…	CACGTGGGTAATCTTCCTCTGAGTCTGGGATAACTTTCCGAAAGGGAAGCTAATACTGGA TGGTCCCGAGAGATCATAAGATTTTTCGGGTAAAGATTTATTGCTCGGAGATGAGCCCGC GTCCGATTAGCTAGTTGGTGAGGTAAAGGCTCACCAAGGCGACGATCGGTAGCCGGCCTG AGAGGGTGTTCGGCCACAATGGAACTGAGACACGGTCCATACTCCTACGGGAGGCAGCAG TTAAGAATCTTGCTCAATGGGGGGAACCCTGAAGCAGCGACGCCGCGTGAACGATGAAGG TCTTCGGATTGTAAAGTTCAGTAAGCAGGGAAAAATAAGCAGCAATGTGATGATGGTACC TGCCTAAAGCACCGGCTAACTACGTGCCAGCAG…	ATGCCGATCATTTTTGCTTCGTCTTTGATTTTATTTCCTCAGACGATTATTCAATGGTTA TCTAATAGTAGTCAAGAATGGGCTGGATGGGCAGTGATTATGGATTTTTTTAATCCATTC TCTCAGATTTGGTATCATGCGTTATTTTATTTCGTAATTTATACCGCTTTAATTGTATTC TTTGCTTACTTTTATACAGCGATTCAGTTTAATCCTGCAGAATTGGCTGAGAATTTGAAA AAATACGGTGGGTTCATTCCAGGAATTCGTCCGGGTTCTCACACAAAAGAATACATTGAA AAAGTGTTAAATAGAATCACTCTTCCCGGAGCTATGTTTCTTGCAGGTTTGGCATTAGCA CCTTATATTATTATAAAATTCTTAGATTTGAGC…
17	UK20	L.interrogans	China	Unknown	CTTTCTATTCCTCAGATTTCTACAGGAGATATTTTACGCGAGGCAGTAAAGAATCAAACT GCGATGGGAATAGAAGCAAAACGTTATATGGATGCGGGAGATTTGGTTCCAGATTCCGTA GTGATTGGAATCATAAAAGATCGCATTCGAGAAGCGGATTGTAAAAATGGATTTTTGTTG GATGGATTTCCGAGAACCGTGGAACAAGCGGAAGCTTTAGATACACTTTTAAAAAATGAA GGCAAGTCTATTGATAAAGCGATTAATCTTCAGGTTCCGGATGCGGAACTCTTAAAGAGA TTACTCGGCCGTGCAGAAATAGAAGGTCGCGCGGACGATAACGAAGTGACGATTAAAAAT CGTCTCGATAATTATAATAAGAAGACCTTACCT…	TATCTCGATATAGAACTGGATTATTATGATTTAGGCGTGGAGTACAGGGACAAAACGGAT GATAAAGTAACCGTGGATTCTGCTCACGCGATTCAAAAATATGGAGTAGGCGTAAAATGT GCGACGATTACTCCTAACCAAGATAGAGTTAAAGAATACAATCTCAAACAAGAATGGAAA TCTCCGAACGGAACCATTCGTTCTATTTTAGACGGAACCGTTTTTCGTAAACCGATCATC GTAAAAAATATTCCTCCTGCGGTTCGTTCTTGGAAAAAACCGATTACAGTAGGACGTCAC GCTTACGGAGATCTTTATAAGGACACAGAACTTTATATTCCCGAAGCCGGAAAGGTGGAA CTCGTTTATACCGGAAAGGACGGAAAAGAAAAA…	ATCTCCGTTGCACTCTTTGCAAGCATTACCGCTTGTGGTGCTTTCGGTGGTCTGCCAAGC CTAAAAAGCTCTTTTGTTCTGAGCGAGGACACAATCCCAGGGACAAACGAAACCGTAAAA ACGTTACTTCCCTACGGATCTGTGATCAACTATTACGGATACGTAAAGCCAGGACAAGCG CCGGACGGTTTAGTCGATGGAAACAAAAAAGCATACTATCTCTATGTTTGGATTCCTGCC GTAATCGCTGAAATGGGAGTTCGTATGATTTCCCCAACAGGCGAAATCGGTGAGCCAGGC GACGGAGACTTAGTAAGCGACGCTTTCAAAGCGGCTACCCCAGAAGAAAAATCAATGCCA CATTGGTTTGATACTTGGATCCGTGTAGAAAGA…	GGAAATTGCGCAGCTACAGTCGATGTAGAATATCCGGTATTCCCGAAAGATAAAGAAGGC CGTGCACTTCAGAAATTCCTCGGAACCATTCGTAACGTAGGTTTGGCTGTTGAAGCTCCT AAAAAAAGTCTTTGGGAAGCAATTTTCGGTGAAGGTTCCAGCTTTATCGATCAGATGCCT TCTAAAGTTTTCGAGGCGTTTGACAAAGAATCTTATTACAAACTTACCGACCTGAGTAAA CGTGCAGACGCAATCAACGAAGCAAGTCTTTCTCTTACAGGAATCACTAAAAATAGAGCG AAGATCGGAAATCTGATTGGAGCGGAAGCAATTCTATACATAGGTTACCAAAAACCTTAT ACAGAGTGTAGTACTGAAAATAAAATCGATGCA…	CACGTGGGTAATCTTCCTCTGAGTCTGGGATAACTTTCCGAAAGGGAAGCTAATACTGGA TGGTCCCGAGAGATCATAAGATTTTTCGGGTAAAGATTTATTGCTCGGAGATGAGCCCGC GTCCGATTAGCTAGTTGGTGAGGTAAAGGCTCACCAAGGCGACGATCGGTAGCCGGCCTG AGAGGGTGTTCGGCCACAATGGAACTGAGACACGGTCCATACTCCTACGGGAGGCAGCAG TTAAGAATCTTGCTCAATGGGGGGAACCCTGAAGCAGCGACGCCGCGTGAACGATGAAGG TCTTCGGATTGTAAAGTTCAGTAAGCAGGGAAAAATAAGCAGCAATGTGATGATGGTACC TGCCTAAAGCACCGGCTAACTACGTGCCAGCAG…	ATGCCGATCATTTTTGCTTCGTCTTTGATTTTATTTCCTCAGACGATTATTCAATGGTTA TCTAATAGTAGTCAAGAATGGGCTGGATGGGCAGTGATTATGGATTTTTTTAATCCATTC TCTCAGATTTGGTATCATGCGTTATTTTATTTCGTAATTTATACCGCTTTAATTGTATTC TTTGCTTACTTTTATACAGCGATTCAGTTTAATCCTGCAGAATTGGCTGAGAATTTGAAA AAATACGGTGGGTTCATTCCAGGAATTCGTCCGGGTTCTCACACAAAAGAATACATTGAA AAAGTGTTAAATAGAATCACTCTTCCCGGAGCTATGTTTCTTGCAGGTTTGGCATTAGCA CCTTATATTATTATAAAATTCTTAGATTTGAGC…
18	UK24	L.interrogans	Denmark	Unknown	CTTTCTATTCCTCAGATTTCTACAGGAGATATTTTACGCGAGGCAGTAAAGAATCAAACT GCGATGGGAATAGAAGCAAAACGTTATATGGATGCGGGAGACTTGGTTCCAGATTCCGTA GTGATTGGAATCATAAAAGATCGCATTCGAGAAGCGGATTGTAAAAATGGATTTTTGTTG GATGGATTTCCGAGAACCGTGGAACAAGCGGAAGCTTTAGATACACTTTTAAAAAATGAA GGCAAGTCTATTGATAAAGCGATTAATCTTCAGGTTCCGGATGCGGAACTCTTAAAGAGA TTACTCGGCCGTGCAGAAATAGAAGGTCGCGCGGACGATAACGAAGTGACGATTAAAAAT CGTCTCGATAATTATAATAAGAAGACCTTACCT…	TATCTCGATATAGAACTGGATTATTATGATTTAGGCGTGGAGTACAGGGACAAAACGGAT GATAAAGTAACCGTGGATTCTGCTCACGCGATTCAAAAATATGGAGTAGGCGTAAAATGT GCGACGATTACTCCTAACCAAGATAGAGTTAAAGAATACAATCTCAAACAAGAATGGAAA TCTCCGAACGGAACCATTCGTTCTATTTTAGACGGAACCGTTTTTCGTAAACCGATCATC GTAAAAAATATTCCTCCTGCGGTTCGTTCTTGGAAAAAACCGATTACAGTAGGACGTCAC GCTTACGGAGATCTTTATAAGGACACAGAACTTTATATTCCCGAAGCCGGAAAGGTGGAA CTCGTTTATACCGGAAAGGACGGAAAAGAAAAA…	ATCTCCGTTGCACTCTTTGCAAGCATTACCGCTTGTGGTGCTTTCGGTGGTCTGCCAAGC CTAAAAAGCTCTTTTGTTCTGAGCGAGGACACAATCCCAGGGACAAACGAAACCGTAAAA ACGTTACTTCCCTACGGATCTGTGATCAACTATTACGGATACGTAAAGCCAGGACAAGCG CCGGACGGTTTAGTCGATGGAAACAAAAAAGCATACTATCTCTATGTTTGGATTCCTGCC GTAATCGCTGAAATGGGAGTTCGTATGATTTCCCCAACAGGCGAAATCGGTGAGCCAGGC GACGGAGACTTAGTAAGCGACGCTTTCAAAGCGGCTACCCCAGAAGAAAAATCAATGCCA CATTGGTTTGATACTTGGATCCGTGTAGAAAGA…	GGAAATTGCGCAGCTACAGTCGATGTAGAATATCCGGTATTCCCGAAAGATAAAGAAGGC CGTGCACTTCAGAAATTCCTCGGAACCATTCGTAACGTAGGTTTGGCTGTTGAAGCTCCT AAAAAAAGTCTTTGGGAAGCAATTTTCGGTGAAGGTTCCAGCTTTATCGATCAGATGCCT TCTAAAGTTTTCGAGGCGTTTGACAAAGAATCTTATTACAAACTTACCGACCTGAGTAAA CGTGCAGACGCAATCAACGAAGCAAGTCTTTCTCTTACAGGAATCACTAAAAATAGAGCG AAGATCGGAAATCTGATTGGAGCGGAAGCAATTCTATACATAGGTTACCAAAAACCTTAT ACAGAGTGTAGTACTGAAAATAAAATCGATGCA…	CACGTGGGTAATCTTCCTCTGAGTCTGGGATAACTTTCCGAAAGGGAAGCTAATACTGGA TGGTCCCGAGAGATCATAAGATTTTTCGGGTAAAGATTTATTGCTCGGAGATGAGCCCGC GTCCGATTAGCTAGTTGGTGAGGTAAAGGCTCACCAAGGCGACGATCGGTAGCCGGCCTG AGAGGGTGTTCGGCCACAATGGAACTGAGACACGGTCCATACTCCTACGGGAGGCAGCAG TTAAGAATCTTGCTCAATGGGGGGAACCCTGAAGCAGCGACGCCGCGTGAACGATGAAGG TCTTCGGATTGTAAAGTTCAGTAAGCAGGGAAAAATAAGCAGCAATGTGATGATGGTACC TGCCTAAAGCACCGGCTAACTACGTGCCAGCAG…	ATGCCGATCATTTTTGCTTCGTCTTTGATTTTATTTCCTCAGACGATTATTCAATGGTTA TCTAATAGTAGTCAAGAATGGGCTGGATGGGCAGTGATTATGGATTTTTTTAATCCATTC TCTCAGATTTGGTATCATGCGTTATTTTATTTCGTAATTTATACCGCTTTAATTGTATTC TTTGCTTACTTTTATACAGCGATTCAGTTTAATCCTGCAGAATTGGCTGAGAATTTGAAA AAATACGGTGGGTTCATTCCAGGAATTCGTCCGGGTTCTCACACAAAAGAATACATTGAA AAAGTGTTAAATAGAATCACTCTTCCCGGAGCTATGTTTCTTGCAGGTTTGGCATTAGCA CCTTATATTATTATAAAATTCTTAGATTTGAGC…
19	UK25	L.interrogans	Australia	Unknown	CTTTCTATTCCTCAGATTTCTACAGGAGATATTTTACGCGAGGCAGTAAAGAATCAAACT GCGATGGGAATAGAAGCAAAACGTTATATGGATGCGGGAGACTTGGTTCCAGATTCCGTA GTGATTGGAATCATAAAAGATCGCATTCGAGAAGCGGATTGTAAAAATGGATTTTTGTTG GATGGATTTCCGAGAACCGTGGAACAAGCGGAAGCTTTAGATACACTTTTAAAAAATGAA GGCAAGTCTATTGATAAAGCGATTAATCTTCAGGTTCCGGATGCGGAACTCTTAAAGAGA TTACTCGGCCGTGCAGAAATAGAAGGTCGCGCGGACGATAACGAAGTGACGATTAAAAAT CGTCTCGATAATTATAATAAGAAGACCTTACCT…	TATCTCGATATAGAACTGGATTATTATGATTTAGGCGTGGAGTACAGGGACAAAACGGAT GATAAAGTAACCGTGGACTCTGCTCACGCGATTCAAAAATATGGAGTAGGCGTAAAATGT GCGACGATTACTCCTAACCAAGATAGAGTTAAAGAATACAATCTCAAACAAGAATGGAAA TCTCCGAACGGAACCATTCGTTCTATTTTAGACGGAACCGTTTTTCGTAAACCGATCATC GTAAAAAATATTCCTCCTGCGGTTCGTTCTTGGAAAAAACCGATTACAGTAGGACGTCAC GCTTACGGAGATCTTTATAAGGACACAGAACTTTATATTCCCGAAGCCGGAAAGGTGGAA CTCGTTTATACCGGAAAGGACGGAAAAGAAAAA…	ATCTCCGTTGCACTCTTTGCAAGCATTACCGCTTGTGGTGCTTTCGGTGGTCTGCCAAGC CTAAAAAGCTCTTTTGTTCTGAGCGAGGACACAATCCCAGGGACAAACGAAACCGTAAAA ACGTTACTTCCCTACGGATCTGTGATCAACTATTACGGATACGTAAAGCCAGGACAAGCG CCGGACGGTTTAGTCGATGGAAACAAAAAAGCATACTATCTCTATGTTTGGATTCCTGCC GTAATCGCTGAAATGGGAGTTCGTATGATTTCCCCAACAGGCGAAATCGGTGAGCCAGGC GACGGAGACTTAGTAAGCGACGCTTTCAAAGCGGCTACCCCAGAAGAAAAATCAATGCCA CATTGGTTTGATACTTGGATCCGTGTAGAAAGA…	GGAAATTGCGCAGCTACAGTCGATGTAGAATATCCGGTATTCCCGAAAGATAAAGAAGGC CGTGCACTTCAGAAATTCCTCGGAACCATTCGTAACGTAGGTTTGGCTGTTGAAGCTCCT AAAAAAAGTCTTTGGGAAGCAATTTTCGGTGAAGGTTCCAGCTTTATCGATCAGATGCCT TCTAAAGTTTTCGAGGCGTTTGACAAAGAATCTTATTACAAACTTACCGACCTGAGTAAA CGTGCAGACGCAATCAACGAAGCAAGTCTTTCTCTTACAGGAATCACTAAAAATAGAGCG AAGATCGGAAATCTGATTGGAGCGGAAGCAATTCTATACATAGGTTACCAAAAACCTTAT ACAGAGTGTAGTACTGAAAATAAAATCGATGCA…	CACGTGGGTAATCTTCCTCTGAGTCTGGGATAACTTTCCGAAAGGGAAGCTAATACTGGA TGGTCCCGAGAGATCATAAGATTTTTCGGGTAAAGATTTATTGCTCGGAGATGAGCCCGC GTCCGATTAGCTAGTTGGTGAGGTAAAGGCTCACCAAGGCGACGATCGGTAGCCGGCCTG AGAGGGTGTTCGGCCACAATGGAACTGAGACACGGTCCATACTCCTACGGGAGGCAGCAG TTAAGAATCTTGCTCAATGGGGGGAACCCTGAAGCAGCGACGCCGCGTGAACGATGAAGG TCTTCGGATTGTAAAGTTCAGTAAGCAGGGAAAAATAAGCAGCAATGTGATGATGGTACC TGCCTAAAGCACCGGCTAACTACGTGCCAGCAG…	ATGCCGATCATTTTTGCTTCGTCTTTGATTTTATTTCCTCAGACGATTATTCAATGGTTA TCTAATAGTAGTCAAGAATGGGCTGGATGGGCAGTGATTATGGATTTTTTTAATCCATTC TCTCAGATTTGGTATCATGCGTTATTTTATTTCGTAATTTATACCGCTTTAATTGTATTC TTTGCTTACTTTTATACAGCGATTCAGTTTAATCCTGCAGAATTGGCTGAGAATTTGAAA AAATACGGTGGATTCATTCCAGGAATTCGTCCAGGTTCTCACACAAAAGAATATATTGAA AAAGTGTTAAATAGAATCACTCTTCCCGGAGCTATGTTTCTTGCAGGTTTGGCATTAGCA CCTTATATTATTATAAAATTCTTAGATTTGAGC…
20	UK29	L.interrogans	Phillippines	Unknown	CTTTCTATTCCTCAGATTTCTACAGGAGATATTTTACGCGAGGCAGTAAAGAATCAAACT GCGATGGGAATAGAAGCAAAACGTTATATGGATGCGGGAGACTTGGTTCCAGATTCCGTA GTGATTGGAATCATAAAAGATCGCATTCGAGAAGCGGATTGTAAAAATGGATTTTTGTTG GATGGATTTCCGAGAACCGTGGAACAAGCGGAAGCTTTAGATACACTTTTAAAAAATGAA GGCAAGTCTATTGATAAAGCGATTAATCTTCAGGTTCCGGATGCGGAACTCTTAAAGAGA TTACTCGGCCGTGCAGAAATAGAAGGTCGCGCGGACGATAACGAAGTGACGATTAAAAAT CGTCTCGATAATTATAATAAGAAGACCTTACCT…	TATCTCGATATAGAACTGGATTATTATGATTTAGGCGTGGAGTACAGGGACAAAACGGAT GATAAAGTAACTGTGGATTCTGCTCACGCGATTCAAAAATATGGAGTAGGCGTAAAATGT GCGACGATTACTCCTAACCAAGATAGAGTTAAAGAATACAATCTCAAACAAGAATGGAAA TCTCCGAACGGAACCATTCGTTCTATTTTAGACGGAACCGTTTTTCGTAAACCGATCATC GTAAAAAATATTCCTCCTGCGGTTCGTTCTTGGAAAAAACCGATTACAGTAGGACGTCAC GCTTACGGAGATCTTTATAAGGACACAGAACTTTATATTCCCGAAGCCGGAAAGGTGGAA CTCGTTTATACCGGAAAGGACGGAAAAGAAAAA…	ATCTCCGTTGCACTCTTTGCAAGCATTACCGCTTGTGGTGCTTTCGGTGGTCTGCCAAGC CTAAAAAGCTCTTTTGTTCTGAGCGAGGACACAATCCCAGGGACAAACGAAACCGTAAAA ACGTTACTTCCCTACGGATCTGTGATCAACTATTACGGATACGTAAAGCCAGGACAAGCG CCGGACGGTTTAGTCGATGGAAACAAAAAAGCATACTATCTCTATGTTTGGATTCCTGCC GTAATCGCTGAAATGGGAGTTCGTATGATTTCCCCAACAGGCGAAATCGGTGAGCCAGGC GACGGAGACTTAGTAAGCGACGCTTTCAAAGCGGCTACCCCAGAAGAAAAATCAATGCCA CATTGGTTTGATACTTGGATCCGTGTAGAAAGA…	GGAAATTGCGCAGCTACAGTCGATGTAGAATATCCGGTATTCCCGAAAGATAAAGAAGGC CGTGCACTTCAGAAATTCCTCGGAACCATTCGTAACGTAGGTTTGGCTGTTGAAGCTCCT AAAAAAAGTCTTTGGGAAGCAATTTTCGGTGAAGGTTCCAGCTTTATCGATCAGATGCCT TCTAAAGTTTTCGAGGCATTTGACAAAGAGTCTTATTACAAACTTACCGACCTGAGCAAA CGTGCAGATGCAATCAACGAAGCAAGTCTTTCTCTTACAGGAATCACTAAAAATAGAGCG AAGATCGGAAATCTGATTGGAGCGGAAGCAATTCTATACATAGGTTACCAAAAACCTTAT ACAGAATGTAGTACTGAAAATAAAATCGATGCG…	CACGTGGGTAATCTTCCTCTGAGTCTGGGATAACTTTCCGAAAGGGAAGCTAATACTGGA TGGTCCCGAGAGATCATAAGATTTTTCGGGTAAAGATTTATTGCTCGGAGATGAGCCCGC GTCCGATTAGCTAGTTGGTGAGGTAAAGGCTCACCAAGGCGACGATCGGTAGCCGGCCTG AGAGGGTGTTCGGCCACAATGGAACTGAGACACGGTCCATACTCCTACGGGAGGCAGCAG TTAAGAATCTTGCTCAATGGGGGGAACCCTGAAGCAGCGACGCCGCGTGAACGATGAAGG TCTTCGGATTGTAAAGTTCAGTAAGCAGGGAAAAATAAGCAGCAATGTGATGATGGTACC TGCCTAAAGCACCGGCTAACTACGTGCCAGCAG…	ATGCCGATCATTTTTGCTTCGTCTTTGATTTTATTTCCTCAGACGATTATTCAATGGTTA TCTAATAGTAGTCAAGAATGGGCTGGATGGGCAGTGATTATGGATTTTTTTAATCCATTC TCTCAGATTTGGTATCATGCGTTATTTTATTTCGTAATTTATACCGCTTTAATTGTATTC TTTGCTTACTTTTATACAGCGATTCAGTTTAATCCTGCAGAATTGGCTGAGAATTTGAAA AAATACGGTGGATTCATTCCAGGAATTCGTCCAGGTTCTCACACAAAAGAATATATTGAA AAAGTGTTAAATAGAATCACTCTTCCCGGAGCTATGTTTCTTGCAGGTTTGGCATTAGCA CCTTATATTATTATAAAATTCTTAGATTTGAGC…
21	QSL2	L.interrogans	Malaysia	Human	CTTTCTATTCCTCAGATTTCTACAGGAGATATTTTACGCGAGGCAGTAAAGAATCAAACT GCGATGGGAATAGAAGCAAAACGTTATATGGATGCGGGAGACTTGGTTCCAGATTCCGTA GTGATTGGAATCATAAAAGATCGCATTCGAGAAGCGGATTGTAAAAATGGATTTTTGTTG GATGGATTTCCGAGAACCGTGGAACAAGCGGAAGCTTTAGATACACTTTTAAAAAATGAA GGCAAGTCTATTGATAAAGCGATTAATCTTCAGGTTCCGGATGCGGAACTCTTAAAGAGA TTACTCGGCCGTGCAGAAATAGAAGGTCGCGCGGACGATAACGAAGTGACGATTAAAAAT CGTCTCGATAATTATAATAAGAAGACCTTACCT…	TATCTCGATATAGAACTGGATTATTATGATTTAGGCGTGGAGTACAGGGACAAAACGGAT GATAAAGTAACCGTGGATTCTGCTCACGCGATTCAAAAATATGGAGTAGGCGTAAAATGT GCGACGATTACTCCTAACCAAGATAGAGTTAAAGAATACAATCTCAAACAAGAATGGAAA TCTCCGAACGGAACCATTCGTTCTATTTTAGACGGAACCGTTTTTCGTAAACCGATCATC GTAAAAAATATTCCTCCTGCGGTTCGTTCTTGGAAAAAACCGATTACAGTAGGACGTCAC GCTTACGGAGATCTTTATAAGGACACAGAACTTTATATTCCCGAAGCCGGAAAGGTGGAA CTCGTTTATACCGGAAAGGACGGAAAAGAAAAA…	ATCTCCGTTGCACTCTTTGCAAGCATTACCGCTTGTGGTGCTTTCGGTGGTCTGCCAAGC CTAAAAAGCTCTTTTGTTCTGAGCGAGGACACAATCCCAGGGACAAACGAAACCGTAAAA ACGTTACTTCCCTACGGATCTGTGATCAACTATTACGGATACGTAAAGCCAGGACAAGCG CCGGACGGTTTAGTCGATGGAAACAAAAAAGCATACTATCTCTATGTTTGGATTCCTGCC GTAATCGCTGAAATGGGAGTTCGTATGATTTCCCCAACAGGCGAAATCGGTGAGCCAGGC GACGGAGACTTAGTAAGCGACGCTTTCAAAGCGGCTACCCCAGAAGAAAAATCAATGCCA CATTGGTTTGATACTTGGATCCGTGTAGAAAGA…	GGAAATTGCGCAGCTACAGTCGATGTAGAATATCCGGTATTCCCGAAAGATAAAGAAGGC CGTGCACTTCAGAAATTCCTCGGAACCATTCGTAACGTAGGTTTGGCTGTTGAAGCTCCT AAAAAAAGTCTTTGGGAAGCAATTTTCGGTGAAGGTTCCAGCTTTATCGATCAGATGCCT TCTAAAGTTTTCGAGGCGTTTGACAAAGAATCTTATTACAAACTTACCGACCTGAGTAAA CGTGCAGACGCAATCAACGAAGCAAGTCTTTCTCTTACAGGAATCACTAAAAATAGAGCG AAGATCGGAAATCTGATTGGAGCGGAAGCATTTCTATACATAGGTTACCAAAAACCTTAT ACAGAGTGTAGTACTGCAAATAAAATCGATGCA…	CACGTGGGTAATCTTCCTCTGAGTCTGGGATAACTTTCCGAAAGGGAAGCTAATACTGGA TGGTCCCGAGAGATCATAAGATTTTTCGGGTAAAGATTTATTGCTCGGAGATGAGCCCGC GTCCGATTAGCTAGTTGGTGAGGTAAAGGCTCACCAAGGCGACGATCGGTAGCCGGCCTG AGAGGGTGTTCGGCCACAATGGAACTGAGACACGGTCCATACTCCTACGGGAGGCAGCAG TTAAGAATCTTGCTCAATGGGGGGAACCCTGAAGCAGCGACGCCGCGTGAACGATGAAGG TCTTCGGATTGTAAAGTTCAGTAAGCAGGGAAAAATAAGCAGCAATGTGATGATGGTACC TGCCTAAAGCACCGGCTAACTACGTGCCAGCAG…	ATGCCGATCATTTTTGCTTCGTCTTTGATTTTATTTCCTCAGACGATTATTCAATGGTTA TCTAATAGTAGTCAAGAATGGGCTGGATGGGCAGTGATTATGGATTTTTTTAATCCATTC TCTCAGATTTGGTATCATGCGTTATTTTATTTCGTAATTTATACCGCTTTAATTGTATTC TTTGCTTACTTTTATACAGCGATTCAGTTTAATCCTGCAGAATTGGCTGAGAATTTGAAA AAATACGGTGGGTTCATTCCAGGAATTCGTCCGGGTTCTCACACAAAAGAATACATTGAA AAAGTGTTAAATAGAATCACTCTTCCCGGAGCTATGTTTCTTGCAGGTTTGGCATTAGCA CCTTATATTATTATAAAATTCTTAGATTTGAGC…
22	QSL3	L.interrogans	New Guinea	Bandicoot	CTTTCCATCCCGCAGATTTCCACGGGTGATATTCTCCGCGAAGCGGTAAAGAATCAAACT GCGATGGGAATAGAAGCAAAACGTTATATGGATGCGGGAGATTTGGTTCCAGATTCCGTA GTGATTGGAATCATAAAAGATCGCATTCGAGAAGCGGATTGTAAAAATGGATTTTTGTTG GATGGATTTCCGAGAACCGTGGAACAAGCGGAAGCTTTAGATACACTTTTAAAAAATGAA GGTAAGTCTATTGATAAAGCGATTAATCTTCAGGTTCCGGATGCGGAACTCTTAAAGAGA TTGCTCGGCCGTGCAGAAATAGAAGGTCGCGCGGACGATAACGAAGTGACGATTAAAAAT CGTCTCGATAATTATAATAAGAAGACTTTACCT…	TATCTCGATATAGAACTGGATTATTATGATTTAGGCGTGGAGTACAGGGACAAAACGGAT GATAAAGTAACCGTGGATTCTGCTCACGCGATTCAAAAATATGGAGTAGGCGTAAAATGT GCGACGATTACTCCTAACCAAGATAGAGTTAAAGAATACAATCTCAAACAAGAATGGAAA TCTCCGAACGGAACCATTCGTTCTATTTTAGACGGAACCGTTTTTCGTAAACCGATCATC GTAAAAAATATTCCTCCTGCGGTTCGTTCTTGGAAAAAACCGATCACAGTAGGACGTCAC GCGTACGGAGATCTTTATAAGGACACAGAACTTTATATTCCCGAAGCCGGAAAGGTGGAA CTCGTTTATACCGGAAAGGACGGAAAGGAAAAA…	ATCTCCGTTGCACTCTTTGCAAGCATTACCGCTTGTGGTGCTTTCGGTGGTCTGCCAAGC CTAAAAAGCTCTTTTGTTCTGAGCGAGGACACAATCCCAGGGACAAACGAAACCGTAAAA ACGTTACTTCCCTACGGATCTGTGATCAACTATTACGGATACGTAAAGCCAGGACAAGCG CCGGACGGTTTAGTCGATGGAAACAAAAAAGCATACTATCTCTATGTTTGGATTCCTGCC GTAATCGCTGAAATGGGAGTTCGTATGATTTCCCCAACAGGCGAAATCGGTGAGCCAGGC GATGGAGACTTAGTAAGCGACGCTTTCAAAGCGGCTACCCCAGAAGAAAAATCAATGCCA CATTGGTTTGATACTTGGATCCGTGTAGAAAGA…	GGAAATTGCGCACCTACAGTCGATGTAGAATATCCGGTATTCCCGAAAGATAAAGAAGGC CGTGCACTTCAGAAATTCCTCGGAACCATTCGTAACGTAGGTTTGGCTGTTGAAGCTCCT AAAAAAAGTCTTTGGGAAGCAATTTTCGGTGAAGGTTCCAGCTTTATCGATCAGATGCCT TCTAAAGTTTTTGAGGCGTTTGACAAAGAATCTTATTACAAACTTACCGACCTGAGCAAA CGTGCAGACGCAATCAACGAAGCAAGTCTTTCTCTTACAGGAATCACTAAAAATAGAGCG AAGATCGGAAATCTGATTGGAGCGGAAGCATTTCTATACATCGGTTACCAAAAACCTTAT ACAGAGTGTAGTACTGAAAATAAAATCGATGCG…	CACGTGGGTAATCTTCCTCTGAGTCTGGGATAACTTTCCGAAAGGGAAGCTAATACTGGA TGGTCCCGAGAGATCACAAGATTTTTCGGGTAAAGATTTATTGCTCGGAGATGAGCCCGC GTCCGATTAGCTAGTTGGTGAGGTAAAGGCTCACCAAGGCGACGATCGGTAGCCGGCCTG AGAGGGTGTTCGGCCACAATGGAACTGAGACACGGTCCATACTCCTACGGGAGGCAGCAG TTAAGAATCTTGCTCAATGGGGGGAACCCTGAAGCAGCGACGCCGCGTGAACGATGAAGG TCTTCGGATTGTAAAGTTCAGTAAGCAGGGAAAAATAAGCAGCAATGTGATGATGGTACC TGCCTAAAGCACCGGCTAACTACGTGCCAGCAG…	ATGCCGATCATTTTTGCTTCGTCTTTGATTTTATTTCCTCAGACGATTATTCAATGGTTA TCTAATAGTAGTCAAGAATGGGCTGGGTGGGCAGTGATTATGGATTTTTTTAATCCATTC TCTCAGATTTGGTACCATGCGTTATTTTATTTCGTAATTTATACTGCTTTAATTGTATTC TTTGCTTACTTTTATACAGCGATTCAGTTTAATCCTGCAGAATTGGCTGAGAATTTGAAA AAATACGGTGGGTTCATTCCAGGAATTCGTCCGGGTTCTCACACAAAAGAATACATTGAA AAAGTGTTAAATAGAATCACTCTTCCCGGAGCTATGTTTCTTGCAGGTTTGGCATTAGCA CCTTATATTATTATAAAATTCTTAGATTTGAGC…
23	QSL4	L.interrogans	Italy	Human	CTTTCTATTCCTCAGGTTTCTACAGGAGATATTTTACGCGAGGCAGTAAAGAATCAAACT GCGATGGGAATAGAAGCAAAACGTTATATGGATGCGGGAGACTTGGTTCCAGATTCCGTA GTGATTGGAATCATAAAAGATCGCATTCGAGAAGCGGATTGTAAAAATGGATTTTTGTTG GATGGATTTCCGAGAACCGTGGAACAAGCGGAAGCTTTAGATACACTTTTAAAAAATGAA GGCAAGTCTATTGATAAAGCGATTAATCTTCAGGTTCCGGATGCGGAACTCTTAAAGAGA TTACTCGGCCGTGCAGAAATAGAAGGTCGCGCGGACGATAACGAAGTGACGATTAAAAAT CGTCTCGATAATTATAATAAGAAGACCTTACCT…	TATCTCGATATAGAACTGGATTATTATGATTTAGGCGTGGAGTACAGGGACAAAACGGAT GATAAAGTAACCGTGGATTCTGCTCACGCGATTCAAAAATATGGAGTAGGCGTAAAATGT GCGACGATTACTCCTAACCAAGATAGAGTTAAAGAATACAATCTCAAACAAGAATGGAAA TCTCCGAACGGAACCATTCGTTCTATTTTAGACGGAACCGTTTTTCGTAAACCGATCATC GTAAAAAATATTCCTCCTGCGGTTCGTTCTTGGAAAAAACCGATTACAGTAGGACGTCAC GCTTACGGAGATCTTTATAAGGACACAGAACTTTATATTCCCGAAGCCGGAAAGGTGGAA CTCGTTTATACCGGAAAGGACGGAAAAGAAAAA…	ATCTCCGTTGCACTCTTTGCAAGCATTACCGCTTGTGGTGCTTTCGGTGGTCTGCCAAGC CTAAAAAGCTCTTTTGTTCTGAGCGAGGACACAATCCCAGGGACAAACGAAACCGTAAAA ACGTTACTTCCCTACGGATCTGTGATCAACTATTACGGATACGTAAAGCCAGGACAAGCG CCGGACGGTTTAGTCGATGGAAACAAAAAAGCATACTATCTCTATGTTTGGATTCCTGCC GTAATCGCTGAAATGGGAGTTCGTATGATTTCCCCAACAGGCGAAATCGGTGAACCAGGC GACGGAGACTTAGTAAGCGACGCTTTCAAAGCGGCTACCCCAGAAGAAAAATCAATGCCA CATTGGTTTGATACTTGGATCCGTGTAGAAAGA…	GGAAATTGCGCACCTACAGTCGATGTAGAATATCCGGTATTCCCGAAAGATAAAGAAGGC CGTGCACTTCAGAAATTCCTCGGAACCATTCGTAACGTAGGTTTGGCTGTTGAAGCTCCT AAAAAAAGTCTTTGGGAAGCAATTTTCGGTGAAGGTTCCAGCTTTATCGATCAGATGCCT TCTAAAGTTTTCGAGGCGTTTGACAAAGAATCTTATTACAAACTTACCGACCTGAGTAAA CGTGCAGACGCAATCAACGAAGCAAGTCTTTCTCTTACAGGAATCACTAAAAATAGAGCG AAGATCGGAAATCTGATTGGAGCGGAAGCATTTCTATACATAGGTTACCAAAAACCTTAT ACAGAGTGTAGTACTGAAAATAAAATCGATGCA…	CACGTGGGTAATCTTCCTCTGAGTCTGGGATAACTTTCCGAAAGGGAAGCTAATACTGGA TGGTCCCGAGAGATCATAAGATTTTTCGGGTAAAGATTTATTGCTCGGAGATGAGCCCGC GTCCGATTAGCTAGTTGGTGAGGTAAAGGCTCACCAAGGCGACGATCGGTAGCCGGCCTG AGAGGGTGTTCGGCCACAATGGAACTGAGACACGGTCCATACTCCTACGGGAGGCAGCAG TTAAGAATCTTGCTCAATGGGGGGAACCCTGAAGCAGCGACGCCGCGTGAACGATGAAGG TCTTCGGATTGTAAAGTTCAGTAAGCAGGGAAAAATAAGCAGCAATGTGATGATGGTACC TGCCTAAAGCACCGGCTAACTACGTGCCAGCAG…	ATGCCGATCATTTTTGCTTCGTCTTTGATTTTATTTCCTCAGACGATTATTCAATGGTTA TCTAATAGTAGTCAAGAATGGGCTGGATGGGCAGTGATTATGGATTTTTTTAATCCATTC TCTCAGATTTGGTATCATGCGTTATTTTATTTCGTAATTTATACCGCTTTAATTGTATTC TTTGCTTACTTTTATACAGCGATTCAGTTTAATCCTGCAGAATTGGCTGAGAATTTGAAA AAATACGGTGGATTCATTCCAGGAATTCGTCCGGGTTCTCACACAAAAGAATATATTGAA AAAGTGTTAAATAGAATCACTCTTCCCGGAGCTATGTTTCTTGCAGGTTTGGCATTAGCA CCTTATATTATTATAAAATTCTTAGATTTGAGC…
24	QSL5	L.interrogans	Germany	Human	CTTTCTATTCCTCAGGTTTCTACAGGAGATATTTTACGCGAGGCAGTAAAGAATCAAACT GCGATGGGAATAGAAGCAAAACGTTATATGGATGCGGGAGACTTGGTTCCAGATTCCGTA GTGATTGGAATCATAAAAGATCGCATTCGAGAAGCGGATTGTAAAAATGGATTTTTGTTG GATGGATTTCCGAGAACCGTGGAACAAGCGGAAGCTTTAGATACACTTTTAAAAAATGAA GGCAAGTCTATTGATAAAGCGATTAATCTTCAGGTTCCGGATGCGGAACTCTTAAAGAGA TTACTCGGCCGTGCAGAAATAGAAGGTCGCGCGGACGATAACGAAGTGACGATTAAAAAT CGTCTCGATAATTATAATAAGAAGACCTTACCT…	TATCTCGATATAGAACTGGATTATTATGATTTAGGCGTGGAGTACAGGGACAAAACGGAT GATAAAGTAACCGTGGATTCTGCTCACGCGATTCAAAAATATGGAGTAGGCGTAAAATGT GCGACGATTACTCCTAACCAAGATAGAGTTAAAGAATACAATCTCAAACAAGAATGGAAA TCTCCGAACGGAACCATTCGTTCTATTTTAGACGGAACCGTTTTTCGTAAACCGATCATC GTAAAAAATATTCCTCCTGCGGTTCGTTCTTGGAAAAAACCGATTACAGTAGGACGTCAC GCTTACGGAGATCTTTATAAGGACACAGAACTTTATATTCCCGAAGCCGGAAAGGTGGAA CTCGTTTATACCGGAAAGGACGGAAAAGAAAAA…	ATCTCCGTTGCACTCTTTGCAAGCATTACCGCTTGTGGTGCTTTCGGTGGTCTGCCAAGC CTAAAAAGCTCTTTTGTTCTGAGCGAGGACACAATCCCAGGGACAAACGAAACCGTAAAA ACGTTACTTCCCTACGGATCTGTGATCAACTATTACGGATACGTAAAGCCAGGACAAGCG CCGGACGGTTTAGTCGATGGAAACAAAAAAGCATACTATCTCTATGTTTGGATTCCTGCC GTAATCGCTGAAATGGGAGTTCGTATGATTTCCCCAACAGGCGAAATCGGTGAACCAGGC GACGGAGACTTAGTAAGCGACGCTTTCAAAGCGGCTACCCCAGAAGAAAAATCAATGCCA CATTGGTTTGATACTTGGATCCGTGTAGAAAGA…	GGAAATTGCGCACCTACAGTCGATGTAGAATATCCGGTATTCCCGAAAGATAAAGAAGGC CGTGCACTTCAGAAATTCCTCGGAACCATTCGTAACGTAGGTTTGGCTGTTGAAGCTCCT AAAAAAAGTCTTTGGGAAGCAATTTTCGGTGAAGGTTCCAGCTTTATCGATCAGATGCCT TCTAAAGTTTTCGAGGCGTTTGACAAAGAATCTTATTACAAACTTACCGACCTGAGTAAA CGTGCAGACGCAATCAACGAAGCAAGTCTTTCTCTTACAGGAATCACTAAAAATAGAGCG AAGATCGGAAATCTGATTGGAGCGGAAGCATTTCTATACATAGGTTACCAAAAACCTTAT ACAGAGTGTAGTACTGAAAATAAAATCGATGCA…	CACGTGGGTAATCTTCCTCTGAGTCTGGGATAACTTTCCGAAAGGGAAGCTAATACTGGA TGGTCCCGAGAGATCATAAGATTTTTCGGGTAAAGATTTATTGCTCGGAGATGAGCCCGC GTCCGATTAGCTAGTTGGTGAGGTAAAGGCTCACCAAGGCGACGATCGGTAGCCGGCCTG AGAGGGTGTTCGGCCACAATGGAACTGAGACACGGTCCATACTCCTACGGGAGGCAGCAG TTAAGAATCTTGCTCAATGGGGGGAACCCTGAAGCAGCGACGCCGCGTGAACGATGAAGG TCTTCGGATTGTAAAGTTCAGTAAGCAGGGAAAAATAAGCAGCAATGTGATGATGGTACC TGCCTAAAGCACCGGCTAACTACGTGCCAGCAG…	ATGCCGATCATTTTTGCTTCGTCTTTGATTTTATTTCCTCAGACGATTATTCAATGGTTA TCTAATAGTAGTCAAGAATGGGCTGGATGGGCAGTGATTATGGATTTTTTTAATCCATTC TCTCAGATTTGGTATCATGCGTTATTTTATTTCGTAATTTATACCGCTTTAATTGTATTC TTTGCTTACTTTTATACAGCGATTCAGTTTAATCCTGCAGAATTGGCTGAGAATTTGAAA AAATACGGTGGATTCATTCCAGGAATTCGTCCGGGTTCTCACACAAAAGAATATATTGAA AAAGTGTTAAATAGAATCACTCTTCCCGGAGCTATGTTTCTTGCAGGTTTGGCATTAGCA CCTTATATTATTATAAAATTCTTAGATTTGAGC…
25	QSL8	L.interrogans	Indonesia	Human	CTTTCTATTCCTCAGATTTCTACAGGAGATATTTTACGCGAGGCAGTAAAGAATCAAACT GCGATGGGAATAGAAGCAAAACGTTATATGGATGCGGGAGATTTGGTTCCAGATTCCGTA GTGATTGGAATCATAAAAGATCGCATTCGAGAAGCGGATTGTAAAAATGGATTTTTGTTG GATGGATTTCCGAGAACCGTGGAACAAGCGGAAGCTTTAGATACACTTTTAAAAAATGAA GGCAAGTCTATTGATAAAGCGATTAATCTTCAGGTTCCGGATGCGGAACTCTTAAAGAGA TTACTCGGCCGTGCAGAAATAGAAGGTCGCGCGGACGATAACGAAGTGACGATTAAAAAT CGTCTCGATAATTATAATAAGAAGACCTTACCT…	TATCTCGATATAGAACTGGATTATTATGATTTAGGCGTGGAGTACAGGGACAAAACGGAT GATAAAGTAACCGTGGATTCTGCTCACGCGATTCAAAAATATGGAGTAGGCGTAAAATGT GCGACGATTACTCCTAACCAAGATAGAGTTAAAGAATACAATCTCAAACAAGAATGGAAA TCTCCGAACGGAACCATTCGTTCTATTTTAGACGGAACCGTTTTTCGTAAACCGATCATC GTAAAAAATATTCCTCCTGCGGTTCGTTCTTGGAAAAAACCGATTACAGTAGGACGTCAC GCTTACGGAGATCTTTATAAGGACACAGAACTTTATATTCCCGAAGCCGGAAAGGTGGAA CTCGTTTATACCGGAAAGGACGGAAAAGAAAAA…	ATCTCCGTTGCACTCTTTGCAAGCATTACCGCTTGTGGTGCTTTCGGTGGTCTGCCAAGC CTAAAAAGCTCTTTTGTTCTGAGCGAGGACACAATCCCAGGGACAAACGAAACCGTAAAA ACGTTACTTCCCTACGGATCTGTGATCAACTATTACGGATACGTAAAGCCAGGACAAGCG CCGGACGGTTTAGTCGATGGAAACAAAAAAGCATACTATCTCTATGTTTGGATTCCTGCC GTAATCGCTGAAATGGGAGTTCGTATGATTTCCCCAACAGGCGAAATCGGTGAGCCAGGC GACGGAGACTTAGTAAGCGACGCTTTCAAAGCGGCTACCCCAGAAGAAAAATCAATGCCA CATTGGTTTGATACTTGGATCCGTGTAGAAAGA…	GGAAATTGCGCACCTACAGTCGATGTAGAATATCCGGTATTCCCGAAAGATAAAGAAGGC CGTGCACTTCAGAAATTCCTCGGAACCATTCGTAACGTAGGTTTGGCTGTTGAAGCTCCT AAAAAAAGTCTTTGGGAAGCAATTTTCGGTGAAGGTTCCAGCTTTATCGATCAGATGCCT TCTAAAGTTTTCGAGGCGTTTGACAAAGAATCTTATTACAAACTTACCGACCTGAGTAAA CGTGCAGACGCAATCAACGAAGCAAGTCTTTCTCTTACAGGAATCACTAAAAATAGAGCG AAGATCGGAAATCTGATTGGAGCGGAAGCATTTCTATACATAGGTTACCAAAAACCTTAT ACAGAGTGTAGTACTGAAAATAAAATCGATGCG…	CACGTGGGTAATCTTCCTCTGAGTCTGGGATAACTTTCCGAAAGGGAAGCTAATACTGGA TGGTCCCGAGAGATCACAAGATTTTTCGGGTAAAGATTTATTGCTCGGAGATGAGCCCGC GTCCGATTAGCTAGTTGGTGAGGTAAAGGCTCACCAAGGCGACGATCGGTAGCCGGCCTG AGAGGGTGTTCGGCCACAATGGAACTGAGACACGGTCCATACTCCTACGGGAGGCAGCAG TTAAGAATCTTGCTCAATGGGGGGAACCCTGAAGCAGCGACGCCGCGTGAACGATGAAGG TCTTCGGATTGTAAAGTTCAGTAAGCAGGGAAAAATAAGCAGCAATGTGATGATGGTACC TGCCTAAAGCACCGGCTAACTACGTGCCAGCAG…	ATGCCGATCATTTTTGCTTCGTCTTTGATTTTATTTCCTCAGACGATTATTCAATGGTTA TCTAATAGTAGTCAAGAATGGGCTGGATGGGCAGTGATTATGGATTTTTTTAATCCATTC TCTCAGATTTGGTATCATGCGTTATTTTATTTCGTAATTTATACCGCTTTAATTGTATTC TTTGCTTACTTCTATACAGCGATTCAGTTTAATCCTGCAGAATTGGCTGAGAATTTGAAA AAATACGGTGGGTTCATTCCAGGAATTCGTCCGGGTTCTCACACAAAAGAATACATTGAA AAAGTGTTAAATAGAATCACTCTTCCCGGAGCTATGTTTCTTGCAGGTTTGGCATTAGCA CCTTATATTATTATAAAATTCTTAGATTTGAGC…
26	QSL11	L.interrogans	Phillipines	Toad	CTTTCTATTCCTCAGATTTCTACAGGAGATATTTTACGCGAGGCAGTAAAGAATCAAACT GCGATGGGAATAGAAGCAAAACGTTATATGGATGCGGGAGACTTGGTTCCAGATTCCGTA GTGATTGGAATCATAAAAGATCGCATTCGAGAAGCGGATTGTAAAAATGGATTTTTGTTG GATGGATTTCCGAGAACCGTGGAACAAGCGGAAGCTTTAGATACACTTTTAAAAAATGAA GGCAAGTCTATTGATAAAGCGATTAATCTTCAGGTTCCGGATGCGGAACTCTTAAAGAGA TTACTCGGCCGTGCAGAAATAGAAGGTCGCGCGGACGATACCGAAGTGACGATTAAAAAT CGTCTCGATAATTATAATAAGAAGACCTTACCT…	TATCTCGATATAGAACTGGATTATTATGATTTAGGCGTGGAGTACAGGGACAAAACGGAT GATAAAGTAACTGTGGATTCTGCTCACGCGATTCAAAAATATGGAGTAGGCGTAAAATGT GCGACGATTACTCCTAACCAAGATAGAGTTAAAGAATACAATCTCAAACAAGAATGGAAA TCTCCGAACGGAACCATTCGTTCTATTTTAGACGGAACCGTTTTTCGTAAACCGATCATC GTAAAAAATATTCCTCCTGCGGTTCGTTCTTGGAAAAAACCGATTACAGTAGGACGTCAC GCTTACGGAGATCTTTATAAGGACACAGAACTTTATATTCCCGAAGCCGGAAAGGTGGAA CTCGTTTATACCGGAAAGGACGGAAAAGAAAAA…	ATCTCCGTTGCACTCTTTGCAAGCATTACCGCTTGTGGTGCTTTCGGTGGTCTGCCAAGC CTAAAAAGCTCTTTTGTTCTGAGCGAGGACACAATCCCAGGGACAAACGAAACCGTAAAA ACGTTACTTCCCTATGGATCTGTGATCAACTATTACGGATACGTAAAGCCAGGACAAGCG CCGGACGGTTTAGTCGATGGAAACAAAAAAGCATACTATCTCTATGTTTGGATTCCTGCC GTAATCGCTGAAATGGGAGTTCGTATGATTTCCCCAACAGGCGAAATCGGTGAGCCAGGC GACGGAGACTTAGTAAGCGACGCTTTCAAAGCGGCTACCCCAGAAGAAAAATCAATGCCA CATTGGTTTGATACTTGGATCCGTGTAGAAAGA…	GGAAATTGCGCAGCTACAGTTGATGTAGAATATCCGGTATTCCCGAAAGATAAAGAAGGC CGTGCACTTCAGAAATTCCTCGGAACCATTCGTAACGTAGGTTTGGCTGTTGAAGCTCCT AAAAAAAGTCTTTGGGAAGCAATTTTCGGTGAAGGTTCCAGCTTTATCGATCAGATGCCT TCTAAAGTTTTCGAGGCATTTGACAAAGAGTCTTATTACAAACTTACCGACCTGAGCAAA CGTGCAGATGCAATCAACGAAGCAAGTCTTTCTCTTACAGGAATCACTAAAAATAGAGCG AAGATCGGAAATCTGATTGGAGCGGAAGCAATTCTATACATAGGTTACCAAAAACCTTAT ACAGAATGTAGTACTGAAAATAAAATCGATGCG…	CACGTGGGTAATCTTCCTCTGAGTCTGGGATAACTTTCCGAAAGGGAAGCTAATACTGGA TGGTCCCGAGAGATCATAAGATTTTTCGGGTAAAGATTTATTGCTCGGAGATGAGCCCGC GTCCGATTAGCTAGTTGGTGAGGTAAAGGCTCACCAAGGCGACGATCGGTAGCCGGCCTG AGAGGGTGTTCGGCCACAATGGAACTGAGACACGGTCCATACTCCTACGGGAGGCAGCAG TTAAGAATCTTGCTCAATGGGGGGAACCCTGAAGCAGCGACGCCGCGTGAACGATGAAGG TCTTCGGATTGTAAAGTTCAGTAAGCAGGGAAAAATAAGCAGCAATGTGATGATGGTACC TGCCTAAAGCACCGGCTAACTACGTGCCAGCAG…	ATGCCGATCATTTTTGCTTCGTCTTTGATTTTATTTCCTCAGACGATTATTCAATGGTTA TCTAATAGTAGTCAAGAATGGGCTGGATGGGCAGTGATTATGGATTTTTTTAATCCATTC TCTCAGATTTGGTATCATGCGTTATTTTATTTCGTAATTTATACCGCTTTAATTGTATTC TTTGCTTACTTTTATACAGCGATTCAGTTTAATCCTGCAGAATTGGCTGAGAATTTGAAA AAATACGGTGGATTCATTCCAGGAATTCGTCCAGGTTCTCACACAAAAGAATATATTGAA AAAGTGTTAAATAGAATCACTCTTCCCGGAGCTATGTTTCTTGCAGGTTTGGCATTAGCA CCTTATATTATTATAAAATTCTTAGATTTGAGC…
27	QSL15	L.interrogans	Malaysia	Human	CTTTCTATTCCTCAGATTTCTACAGGAGATATTTTACGCGAGGCAGTAAAGAATCAAACT GCGATGGGAATAGAAGCAAAACGTTATATGGATGCGGGAGACTTGGTTCCAGATTCCGTA GTGATTGGAATCATAAAAGATCGCATTCGAGAAGCGGATTGTAAAAATGGATTTTTGTTG GATGGATTTCCGAGAACCGTGGAACAAGCGGAAGCTTTAGATACACTTTTAAAAAATGAA GGCAAGTCTATTGATAAAGCGATTAATCTTCAGGTTCCGGATGCGGAACTCTTAAAGAGA TTACTCGGCCGTGCAGAAATAGAAGGTCGCGCGGACGATAACGAAGTGACGATTAAAAAT CGTCTCGATAATTATAATAAGAAGACCTTACCT…	TATCTCGATATAGAACTGGATTATTATGATTTAGGCGTGGAGTACAGGGACAAAACGGAT GATAAAGTAACTGTGGATTCTGCTCACGCGATTCAAAAATATGGAGTAGGCGTAAAATGT GCGACGATTACTCCTAACCAAGATAGAGTTAAAGAATACAATCTCAAACAAGAATGGAAA TCTCCGAACGGAACCATTCGTTCTATTTTAGACGGAACCGTTTTTCGTAAACCGATCATC GTAAAAAATATTCCTCCTGCGGTTCGTTCTTGGAAAAAACCGATTACAGTAGGACGTCAC GCTTACGGAGATCTTTATAAGGACACAGAACTTTATATTCCCGAAGCCGGAAGGGTGGAA CTCGTTTATACCGGAAAGGACGGAAAAGAAAAA…	ATCTCCGTTGCACTCTTTGCAAGCATTACCGCTTGTGGTGCTTTCGGTGGTCTGCCAAGC CTAAAAAGCTCTTTTGTTCTGAGCGAGGACACAATCCCAGGGACAAACGAAACCGTAAAA ACGTTACTTCCCTACGGATCTGTGATCAACTATTACGGATACGTAAAGCCAGGACAAGCG CCGGACGGTTTAGTCGATGGAAACAAAAAAGCATACTATCTCTATGTTTGGATTCCTGCC GTAATCGCTGAAATGGGAGTTCGTATGATTTCCCCAACAGGCGAAATCGGTGAGCCAGGC GACGGAGACTTAGTAAGCGACGCTTTCAAAGCGGCTACCCCAGAAGAAAAATCAATGCCA CATTGGTTTGATACTTGGATCCGTGTAGAAAGA…	GGAAATTGCGCAGCTACAGTTGATGTAGAATATCCGGTATTCCCGAAAGATAAAGAAGGC CGTGCACTTCAGAAATTCCTCGGAACCATTCGTAACGTAGGTTTGGCTGTTGAAGCTCCT AAAAAAAGTCTTTGGGAAGCAATTTTCGGTGAAGGTTCCAGCTTTATCGATCAGATGCCT TCTAAAGTTTTCGAGGCGTTTGACAAAGAATCTTATTACAAACTTACCGACCTGAGTAAA CGTGCAGACGCAATCAACGAAGCAAGTCTTTCTCTTACAGGAATCACTAAAAATAGAGCG AAGATCGGAAATCTGATTGGAGCGGAAGCAATTCTATACATAGGTTACCAAAAACCTTAT ACAGAGTGTAGTACTGAAAATAAAATCGATGCG…	CACGTGGGTAATCTTCCTCTGAGTCTGGGATAACTTTCCGAAAGGGAAGCTAATACTGGA TGGTCCCGAGAGATCACAAGATTTTTCGGGTAAAGATTTATTGCTCGGAGATGAGCCCGC GTCCGATTAGCTAGTTGGTGAGGTAAAGGCTCACCAAGGCGACGATCGGTAGCCGGCCTG AGAGGGTGTTCGGCCACAATGGAACTGAGACACGGTCCATACTCCTACGGGAGGCAGCAG TTAAGAATCTTGCTCAATGGGGGGAACCCTGAAGCAGCGACGCCGCGTGAACGATGAAGG TCTTCGGATTGTAAAGTTCAGTAAGCAGGGAAAAATAAGCAGCAATGTGATGATGGTACC TGCCTAAAGCACCGGCTAACTACGTGCCAGCAG…	ATGCCGATCATTTTTGCTTCGTCTTTGATTTTATTTCCTCAGACGATTATTCAATGGTTA TCTAATAGTAGTCAAGAATGGGCTGGATGGGCAGTGATTATGGATTTTTTTAATCCATTC TCTCAGATTTGGTATCATGCGTTATTTTATTTCGTAATTTATACCGCTTTAATTGTATTC TTTGCTTACTTTTATACAGCGATTCAGTTTAATCCTGCAGAATTGGCTGAGAATTTGAAA AAATACGGTGGGTTCATTCCAGGAATTCGTCCGGGTTCTCACACAAAAGAATACATTGAA AAAGTGTTAAATAGAATCACTCTTCCCGGAGCTATGTTTCTTGCAGGTTTGGCATTAGCA CCTTATATTATTATAAAATTCTTAGATTTGAGC…
28	QSL17	L.interrogans	China	Human	CTTTCTATTCCTCAGATTTCTACAGGAGATATTTTACGCGAGGCAGTAAAGAATCAAACT GCGATGGGAATAGAAGCAAAACGTTATATGGATGCGGGAGATTTGGTTCCAGATTCCGTA GTGATTGGAATCATAAAAGATCGCATTCGAGAAGCGGATTGTAAAAATGGATTTTTGTTG GATGGATTTCCGAGAACCGTGGAACAAGCGGAAGCTTTAGATACACTTTTAAAAAATGAA GGCAAGTCTATTGATAAAGCGATTAATCTTCAGGTTCCGGATGCGGAACTCTTAAAGAGA TTACTCGGCCGTGCAGAAATAGAAGGTCGCGCGGACGATAACGAAGTGACGATTAAAAAT CGTCTCGATAATTATAATAAGAAGACCTTACCT…	TATCTCGATATAGAACTGGATTATTATGATTTAGGCGTGGAGTACAGGGACAAAACGGAT GATAAAGTAACCGTGGATTCTGCTCACGCGATTCAAAAATATGGAGTAGGCGTAAAATGT GCGACGATTACTCCTAACCAAGATAGAGTTAAAGAATACAATCTCAAACAAGAATGGAAA TCTCCGAACGGAACCATTCGTTCTATTTTAGACGGAACCGTTTTTCGTAAACCGATCATC GTAAAAAATATTCCTCCTGCGGTTCGTTCTTGGAAAAAACCGATTACAGTAGGACGTCAC GCTTACGGAGATCTTTATAAGGACACAGAACTTTATATTCCCGAAGCCGGAAAGGTGGAA CTCGTTTATACCGGAAAGGACGGAAAAGAAAAA…	ATCTCCGTTGCACTCTTTGCAAGCATTACCGCTTGTGGTGCTTTCGGTGGTCTGCCAAGC CTAAAAAGCTCTTTTGTTCTGAGCGAGGACACAATCCCAGGGACAAACGAAACCGTAAAA ACGTTACTTCCCTACGGATCTGTGATCAACTATTACGGATACGTAAAGCCAGGACAAGCG CCGGACGGTTTAGTCGATGGAAACAAAAAAGCATACTATCTCTATGTTTGGATTCCTGCC GTAATCGCTGAAATGGGAGTTCGTATGATTTCCCCAACAGGCGAAATCGGTGAGCCAGGC GACGGAGACTTAGTAAGCGACGCTTTCAAAGCGGCTACCCCAGAAGAAAAATCAATGCCA CATTGGTTTGATACTTGGATCCGTGTAGAAAGA…	GGAAATTGCGCAGCTACAGTTGATGTAGAATATCCGGTATTCCCGAAAGATAAAGAAGGC CGTGCACTTCAGAAATTCCTCGGAACCATTCGTAACGTAGGTTTGGCTGTTGAAGCTCCT AAAAAAAGTCTTTGGGAAGCAATTTTCGGTGAAGGTTCCAGCTTTATCGATCAGATGCCT TCTAAAGTTTTCGAGGCGTTTGACAAAGAATCTTATTACAAACTTACCGACCTGAGTAAA CGTGCAGACGCAATCAACGAAGCAAGTCTTTCTCTTACAGGAATCACTAAAAATAGAGCG AAGATCGGAAATCTGATTGGAGCGGAAGCAATTCTATACATAGGTTACCAAAAACCTTAT ACAGAGTGTAGTACTGAAAATAAAATCGATGCA…	CACGTGGGTAATCTTCCTCTGAGTCTGGGATAACTTTCCGAAAGGGAAGCTAATACTGGA TGGTCCCGAGAGATCATAAGATTTTTCGGGTAAAGATTTATTGCTCGGAGATGAGCCCGC GTCCGATTAGCTAGTTGGTGAGGTAAAGGCTCACCAAGGCGACGATCGGTAGCCGGCCTG AGAGGGTGTTCGGCCACAATGGAACTGAGACACGGTCCATACTCCTACGGGAGGCAGCAG TTAAGAATCTTGCTCAATGGGGGGAACCCTGAAGCAGCGACGCCGCGTGAACGATGAAGG TCTTCGGATTGTAAAGTTCAGTAAGCAGGGAAAAATAAGCAGCAATGTGATGATGGTACC TGCCTAAAGCACCGGCTAACTACGTGCCAGCAG…	ATGCCGATCATTTTTGCTTCGTCTTTGATTTTATTTCCTCAGACGATTATTCAATGGTTA TCTAATAGTAGTCAAGAATGGGCTGGATGGGCAGTGATTATGGATTTTTTTAATCCATTC TCTCAGATTTGGTATCATGCGTTATTTTATTTCGTAATTTATACCGCTTTAATTGTATTC TTTGCTTACTTCTATACAGCGATTCAGTTTAATCCTGCAGAATTGGCTGAGAATTTGAAA AAATACGGTGGATTCATTCCAGGAATTCGTCCGGGTTCTCACACAAAAGAATACATTGAA AAAGTGTTAAATAGAATCACTCTCCCTGGAGCTATGTTTCTTGCAGGTTTGGCATTAGCA CCTTATATTATTATAAAATTCTTAGATTTGAGC…
29	QSL18	L.interrogans	Sri Lanka	Human	CTTTCTATTCCTCAGATTTCTACAGGAGATATTTTACGCGAGGCAGTAAAGAATCAAACT GCGATGGGAATAGAAGCAAAACGTTATATGGATGCGGGAGATTTGGTTCCAGATTCCGTA GTGATTGGAATCATAAAAGATCGCATTCGAGAAGCGGATTGTAAAAATGGATTTTTGTTG GATGGATTTCCGAGAACCGTGGAACAAGCGGAAGCTTTAGATACACTTTTAAAAAATGAA GGCAAGTCTATTGATAAAGCGATTAATCTTCAGGTTCCGGATGCGGAACTCTTAAAGAGA TTACTCGGCCGTGCAGAAATAGAAGGTCGCGCGGACGATAACGAAGTGACGATTAAAAAT CGTCTCGATAATTATAATAAGAAGACCTTACCT…	TATCTCGATATAGAACTGGATTATTATGATTTAGGCGTGGAGTACAGGGACAAAACGGAT GATAAAGTAACCGTGGATTCTGCTCACGCGATTCAAAAATATGGAGTAGGCGTAAAATGT GCGACGATTACTCCTAACCAAGATAGAGTTAAAGAATACAATCTCAAACAAGAATGGAAA TCTCCGAACGGAACCATTCGTTCTATTTTAGACGGAACCGTTTTTCGTAAACCGATCATC GTAAAAAATATTCCTCCTGCGGTTCGTTCTTGGAAAAAACCGATTACAGTAGGACGTCAC GCTTACGGAGATCTTTATAAGGACACAGAACTTTATATTCCCGAAGCCGGAAAGGTGGAA CTCGTTTATACCGGAAAGGACGGAAAAGAAAAA…	ATCTCCGTTGCACTCTTTGCAAGCATTACCGCTTGTGGTGCTTTCGGTGGTCTGCCAAGC CTAAAAAGCTCTTTTGTTCTGAGCGAGGACACAATCCCAGGGACAAACGAAACCGTAAAA ACGTTACTTCCCTACGGATCTGTGATCAACTATTACGGATACGTAAAGCCAGGACAAGCG CCGGACGGTTTAGTCGATGGAAACAAAAAAGCATACTATCTCTATGTTTGGATTCCTGCC GTAATCGCTGAAATGGGAGTTCGTATGATTTCCCCAACAGGCGAAATCGGTGAGCCAGGC GACGGAGACTTAGTAAGCGACGCTTTCAAAGCGGCTACCCCAGAAGAAAAATCAATGCCA CATTGGTTTGATACTTGGATCCGTGTAGAAAGA…	GGAAATTGCGCAGCTACAGTTGATGTAGAATATCCGGTATTCCCGAAAGATAAAGAAGGC CGTGCACTTCAGAAATTCCTCGGAACCATTCGTAACGTAGGTTTGGCTGTTGAAGCTCCT AAAAAAAGTCTTTGGGAAGCAATTTTCGGTGAAGGTTCCAGCTTTATCGATCAGATGCCT TCTAAAGTTTTCGAGGCGTTTGACAAAGAATCTTATTACAAACTTACCGACCTGAGTAAA CGTGCAGACGCAATCAACGAAGCAAGTCTTTCTCTTACAGGAATCACTAAAAATAGAGCG AAGATCGGAAATCTGATTGGAGCGGAAGAAATTCTATACATAGGTTACCAAAAACCTTAT ACAGAGTGTAGTACTGAAAATAAAATCGATGCG…	CACGTGGGTAATCTTCCTCTGAGTCTGGGATAACTTTCCGAAAGGGAAGCTAATACTGGA TGGTCCCGAGAGATCACAAGATTTTTCGGGTAAAGATTTATTGCTCGGAGATGAGCCCGC GTCCGATTAGCTAGTTGGTGAGGTAAAGGCTCACCAAGGCGACGATCGGTAGCCGGCCTG AGAGGGTGTTCGGCCACAATGGAACTGAGACACGGTCCATACTCCTACGGGAGGCAGCAG TTAAGAATCTTGCTCAATGGGGGGAACCCTGAAGCAGCGACGCCGCGTGAACGATGAAGG TCTTCGGATTGTAAAGTTCAGTAAGCAGGGAAAAATAAGCAGCAATGTGATGATGGTACC TGCCTAAAGCACCGGCTAACTACGTGCCAGCAG…	ATGCCGATCATTTTTGCTTCGTCTTTGATTTTATTCCCTCAGACGATTATTCAATGGTTA TCTAATAGTAGTCAAGAATGGGCTGGATGGGCAGTGATTATGGATTTTTTTAATCCATTC TCTCAGATTTGGTATCATGCGTTATTTTATTTCGTAATTTATACCGCTTTAATTGTATTC TTTGCTTACTTTTATACAGCGATTCAGTTTAATCCTGCAGAATTGGCTGAGAATTTGAAA AAATACGGTGGATTCATTCCAGGAATTCGTCCAGGTTCTCACACAAAAGAATATATTGAA AAAGTGTTAAATAGAATCACTCTTCCCGGAGCTATGTTTCTTGCAGGTTTGGCATTAGCA CCTTATATTATTATAAAATTCTTAGATTTGAGC…
30	QSL22	L.interrogans	Indonesia	Human	CTTTCTATTCCTCAGATTTCTACAGGAGATATTTTACGCGAGGCAGTAAAGAATCAAACT GCGATGGGAATAGAAGCAAAACGTTATATGGATGCGGGAGATTTGGTTCCAGATTCCGTA GTGATTGGAATCATAAAAGATCGCATTCGAGAAGCGGATTGTAAAAATGGATTTTTGTTG GATGGATTTCCGAGAACCGTGGAACAAGCGGAAGCTTTAGATACACTTTTAAAAAATGAA GGCAAGTCTATTGATAAAGCGATTAATCTTCAGGTTCCGGATGCGGAACTCTTAAAGAGA TTACTCGGCCGTGCAGAAATAGAAGGTCGCGCGGACGATAACGAAGTGACGATTAAAAAT CGTCTCGATAATTATAATAAGAAGACCTTACCT…	TATCTCGATATAGAACTGGATTATTATGATTTAGGCGTGGAGTACAGGGACAAAACGGAT GATAAAGTAACTGTGGATTCTGCTCACGCGATTCAAAAATATGGAGTAGGCGTAAAATGT GCGACGATTACTCCTAACCAAGATAGAGTTAAAGAATACAATCTCAAACAAGAATGGAAA TCTCCGAACGGAACCATTCGTTCTATTTTAGACGGAACCGTTTTTCGTAAACCGATCATC GTAAAAAATATTCCTCCTGCGGTTCGTTCTTGGAAAAAACCGATTACAGTAGGACGTCAC GCTTACGGAGATCTTTATAAGGACACAGAACTTTATATTCCCGAAGCCGGAAAGGTGGAA CTCGTTTATACCGGAAAGGACGGAAAAGAAAAA…	ATCTCCGTTGCACTCTTTGCAAGCATTACCGCTTGTGGTGCTTTCGGTGGTCTGCCAAGC CTAAAAAGCTCTTTTGTTCTGAGCGAGGACACAATCCCAGGGACAAACGAAACCGTAAAA ACGTTACTTCCCTACGGATCTGTGATCAACTATTACGGATACGTAAAGCCAGGACAAGCG CCGGACGGTTTAGTCGATGGAAACAAAAAAGCATACTATCTCTATGTTTGGATTCCTGCC GTAATCGCTGAAATGGGAGTTCGTATGATTTCCCCAACAGGCGAAATCGGTGAGCCAGGC GACGGAGACTTAGTAAGCGACGCTTTCAAAGCGGCTACCCCAGAAGAAAAATCAATGCCA CATTGGTTTGATACTTGGATCCGTGTAGAAAGA…	GGAAATTGCGCAGCTACAGTTGATGTAGAATATCCGGTATTCCCGAAAGATAAAGAAGGC CGTGCACTTCAGAAATTCCTCGGAACCATTCGTAACGTAGGTTTGGCTGTTGAAGCTCCT AAAAAAAGTCTTTGGGAAGCAATTTTCGGTGAAGGTTCCAGCTTTATCGATCAGATGCCT TCTAAAGTTTTCGAGGCGTTTGACAAAGAATCTTATTACAAACTTACCGACCTGAGTAAA CGTGCAGACGCAATCAACGAAGCAAGTCTTTCTCTTACAGGAATCACTAAAAATAGAGCG AAGATCGGAAATCTGATTGGAGCGGAAGAATTTCTATACATAGGTTACCAAAAACCTTAT ACAGAGTGTAGTACTGAAAATAAAATCGATGCG…	CACGTGGGTAATCTTCCTCTGAGTCTGGGATAACTTTCCGAAAGGGAAGCTAATACTGGA TGGTCCCGAGAGATCATAAGATTTTTCGGGTAAAGATTTATTGCTCGGAGATGAGCCCGC GTCCGATTAGCTAGTTGGTGAGGTAAAGGCTCACCAAGGCGACGATCGGTAGCCGGCCTG AGAGGGTGTTCGGCCACAATGGAACTGAGACACGGTCCATACTCCTACGGGAGGCAGCAG TTAAGAATCTTGCTCAATGGGGGGAACCCTGAAGCAGCGACGCCGCGTGAACGATGAAGG TCTTCGGATTGTAAAGTTCAGTAAGCAGGGAAAAATAAGCAGCAATGTGATGATGGTACC TGCCTAAAGCACCGGCTAACTACGTGCCAGCAG…	ATGCCGATCATTTTTGCTTCGTCTTTGATTTTATTTCCTCAGACGATTATTCAATGGTTA TCTAATAGTAGTCAAGAATGGGCTGGATGGGCAGTGATTATGGATTTTTTTAATCCATTC TCTCAGATTTGGTATCATGCGTTATTTTATTTCGTAATTTATACCGCTTTAATTGTATTC TTTGCTTACTTCTATACAGCGATTCAGTTTAATCCTGCAGAATTGGCTGAGAATTTGAAA AAATACGGTGGGTTCATTCCAGGAATTCGTCCGGGTTCTCACACAAAAGAATACATTGAA AAAGTGTTAAATAGAATCACTCTTCCCGGAGCTATGTTTCTTGCAGGTTTGGCATTAGCA CCTTATATTATTATAAAATTCTTAGATTTGAGC…
31	QSL27	L.interrogans	Phillippines	Rat	CTTTCTATTCCTCAGATTTCTACAGGAGATATTTTACGCGAGGCAGTAAAGAATCAAACT GCGATGGGAATAGAAGCAAAACGTTATATGGATGCGGGAGATTTGGTTCCAGATTCCGTA GTGATTGGAATCATAAAAGATCGCATTCGAGAAGCGGATTGTAAAAATGGATTTTTGTTG GATGGATTTCCGAGAACCGTGGAACAAGCGGAAGCTTTAGATACACTTTTAAAAAATGAA GGCAAGTCTATTGATAAAGCGATTAATCTTCAGGTTCCGGATGCGGAACTCTTAAAGAGA TTACTCGGCCGTGCAGAAATAGAAGGTCGCGCGGACGATAACGAAGTGACGATTAAAAAT CGTCTCGATAATTATAATAAGAAGACCTTACCT…	TATCTCGATATAGAACTGGATTATTATGATTTAGGCGTGGAGTACAGGGACAAAACGGAT GATAAAGTAACTGTGGATTCTGCTCACGCGATTCAAAAATATGGAGTAGGCGTAAAATGT GCGACGATTACTCCTAACCAAGATAGAGTTAAAGAATACAATCTCAAACAAGAATGGAAA TCTCCGAACGGAACCATTCGTTCTATTTTAGACGGAACCGTTTTTCGTAAACCGATCATC GTAAAAAATATTCCTCCTGCGGTTCGTTCTTGGAAAAAACCGATTACAGTAGGACGTCAC GCTTACGGAGATCTTTATAAGGACACAGAACTTTATATTCCCGAAGCCGGAAAGGTGGAA CTCGTTTATACCGGAAAGGACGGAAAAGAAAAA…	ATCTCCGTTGCACTCTTTGCAAGCATTACCGCTTGTGGTGCTTTCGGTGGTCTGCCAAGC CTAAAAAGCTCTTTTGTTCTGAGCGAGGACACAATCCCAGGGACAAACGAAACCGTAAAA ACGTTACTTCCCTACGGATCTGTGATCAACTATTACGGATACGTAAAGCCAGGACAAGCG CCGGACGGTTTAGTCGATGGAAACAAAAAAGCATACTATCTCTATGTTTGGATTCCTGCC GTAATCGCTGAAATGGGAGTTCGTATGATTTCCCCAACAGGCGAAATCGGTGAGCCAGGC GACGGAGACTTAGTAAGCGACGCTTTCAAAGCGGCTACCCCAGAAGAAAAATCAATGCCA CATTGGTTTGATACTTGGATCCGTGTAGAAAGA…	GGAAATTGCGCAGCTACAGTTGATGTAGAATATCCGGTATTCCCGAAAGATAAAGAAGGC CGTGCACTTCAGAAATTCCTCGGAACCATTCGTAACGTAGGTTTGGCTGTTGAAGCTCCT AAAAAAAGTCTTTGGGAAGCAATTTTCGGTGAAGGTTCCAGCTTTATCGATCAGATGCCT TCTAAAGTTTTCGAGGCGTTTGACAAAGAATCTTATTACAAACTTACCGACCTGAGTAAA CGTGCAGACGCAATCAACGAAGCAAGTCTTTCTCTTACAGGAATCACTAAAAATAGAGCG AAGATCGGAAATCTGATTGGAGCGGAAGCATTTCTATACATAGGTTACCAAAAACCTTAT ACAGAGTGTAGTACTGAAAATAAAATCGATGCG…	CACGTGGTTAATCTTCCTCTGAGTCTGGGATAACTTTCCGAAAGGGAAGCTAATACTGGA TGGTCCCGAGAGATCATAAGATTTTTCGGGTAAAGATTTATTGCTCGGAGATGAGCCCGC GTCCGATTAGCTAGTTGGTGAGGTAAAGGCTCACCAAGGCGACGATCGGTAGCCGGCCTG AGAGGGTGTTCGGCCACAATGGAACTGAGACACGGTCCATACTCCTACGGGAGGCAGCAG TTAAGAATCTTGCTCAATGGGGGGAACCCTGAAGCAGCGACGCCGCGTGAACGATGAAGG TCTTCGGATTGTAAAGTTCAGTAAGCAGGGAAAAATAAGCAGCAATGTGATGATGGTACC TGCCTAAAGCACCGGCTAACTACGTGCCAGCAG…	ATGCCGATCATTTTTGCTTCGTCTTGGATTTTATTTCCTCAGACGATTATTCAATGGTTA TCTAATAGTAGTCAAGAATGGGCTGGATGGGCAGTGATTATGGATTTTTTTAATCCATTC TCTCAGATTTGGTATCATGCGTTATTTTATTTCGTAATTTATACCGCTTTAATTGTATTC TTTGCTTACTTCTATACAGCGATTCAGTTTAATCCTGCAGAATTGGCTGAGAATTTGAAA AAATACGGTGGGTTCATTCCAGGAATTCGTCCGGGTTCTCACACAAAAGAATACATTGAA AAAGTGTTAAATAGAATCACTCTTCCCGGAGCTATGTTTCTTGCAGGTTTGGCATTAGCA CCTTATATTATTATAAAATTCTTAGATTTGAGC…
32	QSL28	L.interrogans	Indonesia	Human	CTTTCTATTCCTCAGATTTCTACAGGAGATATTTTACGCGAGGCAGTAAAGAATCAAACT GCGATGGGAATAGAAGCAAAACGTTATATGGATGCGGGAGATTTGGTTCCAGATTCCGTA GTGATTGGAATCATAAAAGATCGCATTCGAGAAGCGGATTGTAAAAATGGATTTTTGTTG GATGGATTTCCGAGAACCGTGGAACAAGCGGAAGCTTTAGATACACTTTTAAAAAATGAA GGCAAGTCTATTGATAAAGCGATTAATCTTCAGGTTCCGGATGCGGAACTCTTAAAGAGA TTACTCGGCCGTGCAGAAATAGAAGGTCGCGCGGACGATAACGAAGTGACGATTAAAAAT CGTCTCGATAATTATAATAAGAAGACCTTACCT…	TATCTCGATATAGAACTGGATTATTATGATTTAGGCGTGGAGTACAGGGACAAAACGGAT GATAAAGTAACCGTGGATTCTGCTCACGCGATTCAAAAATATGGAGTAGGCGTAAAATGT GCGACGATTACTCCTAACCAAGATAGAGTTAAAGAATACAATCTCAAACAAGAATGGAAA TCTCCGAACGGAACCATTCGTTCTATTTTAGACGGAACCGTTTTTCGTAAACCGATCATC GTAAAAAATATTCCTCCTGCGGTTCGTTCTTGGAAAAAACCGATTACAGTAGGACGTCAC GCTTACGGAGATCTTTATAAGGACACAGAACTTTATATTCCCGAAGCCGGAAAGGTGGAA CTCGTTTATACCGGAAAGGACGGAAAAGAAAAA…	ATCTCCGTTGCACTCTTTGCAAGCATTACCGCTTGTGGTGCTTTCGGTGGTCTGCCAAGC CTAAAAAGCTCTTTTGTTCTGAGCGAGGACACAATCCCAGGGACAAACGAAACCGTAAAA ACGTTACTTCCCTACGGATCTGTGATCAACTATTACGGATACGTAAAGCCAGGACAAGCG CCGGACGGTTTAGTCGATGGAAACAAAAAAGCATACTATCTCTATGTTTGGATTCCTGCC GTAATCGCTGAAATGGGAGTTCGTATGATTTCCCCAACAGGCGAAATCGGTGAGCCAGGC GACGGAGACTTAGTAAGCGACGCTTTCAAAGCGGCTACCCCAGAAGAAAAATCAATGCCA CATTGGTTTGATACTTGGATCCGTGTAGAAAGA…	GGAAATTGCGCAGCTACAGTTGATGTAGAATATCCGGTATTCCCGAAAGATAAAGAAGGC CGTGCACTTCAGAAATTCCTCGGAACCATTCGTAACGTAGGTTTGGCTGTTGAAGCTCCT AAAAAAAGTCTTTGGGAAGCAATTTTCGGTGAAGGTTCCAGCTTTATCGATCAGATGCCT TCTAAAGTTTTCGAGGCGTTTGACAAAGAATCTTATTACAAACTTACCGACCTGAGTAAA CGTGCAGACGCAATCAACGAAGCAAGTCTTTCTCTTACAGGAATCACTAAAAATAGAGCG AAGATCGGAAATCTGATTGGAGCGGAAGCATTTCTATACATAGGTTACCAAAAACCTTAT ACAGAGTGTAGTACTGAAAATAAAATCGATGCG…	CACGTGGGTAATCTTCCTCTGAGTCTGGGATAACTTTCCGAAAGGGAAGCTAATACTGGA TGGTCCCGAGAGATCATAAGATTTTTCGGGTAAAGATTTATTGCTCGGAGATGAGCCCGC GTCCGATTAGCTAGTTGGTGAGGTAAAGGCTCACCAAGGCGACGATCGGTAGCCGGCCTG AGAGGGTGTTCGGCCACAATGGAACTGAGACACGGTCCATACTCCTACGGGAGGCAGCAG TTAAGAATCTTGCTCAATGGGGGGAACCCTGAAGCAGCGACGCCGCGTGAACGATGAAGG TCTTCGGATTGTAAAGTTCAGTAAGCAGGGAAAAATAAGCAGCAATGTGATGATGGTACC TGCCTAAAGCACCGGCTAACTACGTGCCAGCAG…	ATGCCGATCATTTTTGCTTCGTCTTTGATTTTATTTCCTCAGACGATTATTCAATGGTTA TCTAATAGTAGTCAAGAATGGGCTGGATGGGCAGTGATTATGGATTTTTTTAATCCATTC TCTCAGATTTGGTATCATGCGTTATTTTATTTCGTAATTTATACCGCTTTAATTGTATTC TTTGCTTACTTTTATACAGCGATTCAGTTTAATCCTGCAGAATTGGCTGAGAATTTGAAA AAATACGGTGGGTTCATTCCAGGAATTCGTCCGGGTTCTCACACAAAAGAATACATTGAA AAAGTGTTAAATAGAATCACTCTTCCCGGAGCTATGTTTCTTGCAGGTTTGGCATTAGCA CCTTATATTATTATAAAATTCTTAGATTTGAGC…
33	QSL32	L.interrogans	Indonesia	Human	CTTTCTATCCCTCAGATTTCCACAGGCGATATTCTCCGCGAAGCGGTAAAGAATCAAACT GAGATGGGAATCGAAGCAAAACGTTATATGGATGCAGGTGATCTGGTACCTGATTCTGTT GTGATCGGAATCATCAAAGATCGTATCCGTGAAGCGGATTGCAGAAATGGGTTTTTATTG GATGGATTTCCAAGAACTGTAGAACAGGCGGAAGCTTTAGATACACTTTTAAAAAATGAA GGTAGGTCTATTGATAAAGCGATTAATCTTCAGGTTCCGGATGCGGAACTTTTAAAAAGA TTACTCAGCCGTGCAGAAATTGAAGGCCGTGCGGACGATACCGAAGTGACGATTAAAAAT CGTCTAGATAATTATAACAGGAAGACTTTACCT…	TATCTCGATATAGAACTGGATTATTATGATTTAGGCGTGGAGTACAGGGACAAAACGGAT GATAAAGTAACCGTGGATTCTGCTCACGCGATTCAAAAATATGGAGTAGGCGTAAAATGT GCGACGATTACTCCTAACCAAGATAGAGTTAAAGAATACAATCTCAAACAAGAATGGAAA TCTCCGAACGGAACCATTCGTTCTATTTTAGACGGAACCGTTTTTCGTAAACCGATCATC GTAAAAAATATTCCTCCTGCGGTTCGTTCTTGGAAAAAACCGATTACAGTAGGACGTCAC GCTTACGGAGATCTTTATAAGGACACAGAACTTTATATTCCCGAAGCCGGAAAGGTGGAA CTCGTTTATACCGGAAAGGACGGAAAAGAAAAA…	ATCTCCGTTGCACTCTTTGCAAGCATTACCGCTTGTGGTGCTTTCGGTGGTCTGCCAAGC CTAAAAAGCTCTTTTGTTCTGAGCGAGGACACAATCCCAGGGACAAACGAAACCGTAAAA ACGTTACTTCCCTACGGATCTGTGATCAACTATTACGGATACGTAAAGCCAGGACAAGCG CCGGACGGTTTAGTCGATGGAAACAAAAAAGCATACTATCTCTATGTTTGGATTCCTGCC GTAATCGCTGAAATGGGAGTTCGTATGATTTCCCCAACAGGCGAAATCGGTGAGCCAGGC GACGGAGACTTAGTAAGCGACGCTTTCAAAGCGGCTACCCCAGAAGAAAAATCAATGCCA CATTGGTTTGATACTTGGATCCGTGTAGAAAGA…	GGAAATTGCGCAGCTACAGTTGATGTAGAATATCCGGTATTCCCGAAAGATAAAGAAGGC CGTGCACTTCAGAAATTCCTCGGAACCATTCGTAACGTAGGTTTGGCTGTTGAAGCTCCT AAAAAAAGTCTTTGGGAAGCAATTTTCGGTGAAGGTTCCAGCTTTATCGATCAGATGCCT TCTAAAGTTTTCGAGGCGTTTGACAAAGAATCTTATTACAAACTTACCGACCTGAGTAAA CGTGCAGACGCAATCAACGAAGCAAGTCTTTCTCTTACAGGAATCACTAAAAATAGAGCG AAGATCGGAAATCTGATTGGAGCGGAAGCATTTCTATACATAGGTTACCAAAAACCTTAT ACAGAGTGTAGTACTGAAAATAAAATCGATGCG…	CACGTGGGTAATCTTCCTCTGAGTCTGGGATAACTTTCCGAAAGGGAAGCTAATACTGGA TGGTCCCGAGAGATCATAAGATTTTTCGGGTAAAGATTTATTGCTCGGAGATGAGCCCGC GTCCGATTAGCTAGTTGGTGAGGTAAAGGCTCACCAAGGCGACGATCGGTAGCCGGCCTG AGAGGGTGTTCGGCCACAATGGAACTGAGACACGGTCCATACTCCTACGGGAGGCAGCAG TTAAGAATCTTGCTCAATGGGGGGAACCCTGAAGCAGCGACGCCGCGTGAACGATGAAGG TCTTCGGATTGTAAAGTTCAGTAAGCAGGGAAAAATAAGCAGCAATGTGATGATGGTACC TGCCTAAAGCACCGGCTAACTACGTGCCAGCAG…	ATGCCGATCATTTTTGCTTCGTCTTTGATTTTATTTCCTCAGACGATTATTCAATGGTTA TCTAATAGTAGTCAAGAATGGGCTGGATGGGCAGTGATTATGGATTTTTTTAATCCATTC TCTCAGATTTGGTATCATGCGTTATTTTATTTCGTAATTTATACCGCTTTAATTGTATTC TTTGCTTACTTTTATACAGCGATTCAGTTTAATCCTGCAGAATTGGCTGAGAATTTGAAA AAATACGGTGGGTTCATTCCAGGAATTCGTCCGGGTTCTCACACAAAAGAATACATTGAA AAAGTGTTAAATAGAATCACTCTTCCCGGAGCTATGTTTCTTGCAGGTTTGGCATTAGCA CCTTATATTATTATAAAATTCTTAGATTTGAGC…
34	QSL33	L.interrogans	Indonesia	Human	CTTTCTATTCCTCAGATTTCTACAGGAGATATTTTACGCGAGGCAGTAAAGAATCAAACT GCGATGGGAATAGAAGCAAAACGTTATATGGATGCGGGAGACTTGGTTCCAGATTCCGTA GTGATTGGAATCATAAAAGATCGCATTCGAGAAGCGGATTGTAAAAATGGATTTTTGTTG GATGGATTTCCGAGAACCGTGGAACAAGCGGAAGCTTTAGATACACTTTTAAAAAATGAA GGCAAGTCTATTGATAAAGCGATTAATCTTCAGGTTCCGGATGCGGAACTCTTAAAGAGA TTACTCGGCCGTGCAGAAATAGAAGGTCGCGCGGACGATAACGAAGTGACGATTAAAAAT CGTCTCGATAATTATAATAAGAAGACCTTACCT…	TATCTCGATATAGAACTGGATTATTATGATTTAGGCGTGGAGTACAGGGACAAAACGGAT GATAAAGTAACCGTGGATTCTGCTCACGCGATTCAAAAATATGGAGTAGGCGTAAAATGT GCGACGATTACTCCTAACCAAGATAGAGTTAAAGAATACAATCTCAAACAAGAATGGAAA TCTCCGAACGGAACCATTCGTTCTATTTTAGACGGAACCGTTTTTCGTAAACCGATCATC GTAAAAAATATTCCTCCTGCGGTTCGTTCTTGGAAAAAACCGATTACAGTAGGACGTCAC GCTTACGGAGATCTTTATAAGGACACAGAACTTTATATTCCCGAAGCCGGAAAGGTGGAA CTCGTTTATACCGGAAAGGACGGAAAAGAAAAA…	ATCTCCGTTGCACTCTTTGCAAGCATTACCGCTTGTGGTGCTTTCGGTGGTCTGCCAAGC CTAAAAAGCTCTTTTGTTCTGAGCGAGGACACAATCCCAGGGACAAACGAAACCGTAAAA ACGTTACTTCCCTACGGATCTGTGATCAACTATTACGGATACGTAAAGCCAGGACAAGCG CCGGACGGTTTAGTCGATGGAAACAAAAAAGCATACTATCTCTATGTTTGGATTCCTGCC GTAATCGCTGAAATGGGAGTTCGTATGATTTCCCCAACAGGCGAAATCGGTGAGCCAGGC GACGGAGACTTAGTAAGCGACGCTTTCAAAGCGGCTACCCCAGAAGAAAAATCAATGCCA CATTGGTTTGATACTTGGATCCGTGTAGAAAGA…	GGAAATTGCGCAGCTACAGTTGATGTAGAATATCCGGTATTCCCGAAAGATAAAGAAGGC CGTGCACTTCAGAAATTCCTCGGAACCATTCGTAACGTAGGTTTGGCTGTTGAAGCTCCT AAAAAAAGTCTTTGGGAAGCAATTTTCGGTGAAGGTTCCAGCTTTATCGATCAGATGCCT TCTAAAGTTTTCGAGGCGTTTGACAAAGAATCTTATTACAAACTTACCGACCTGAGTAAA CGTGCAGACGCAATCAACGAAGCAAGTCTTTCTCTTACAGGAATCACTAAAAATAGAGCG AAGATCGGAAATCTGATTGGAGCGGAAGCATTTCTATACATAGGTTACCAAAAACCTTAT ACAGAGTGTAGTACTGAAAATAAAATCGATGCG…	CACGTGGGTAATCTTCCTCTGAGTCTGGGATAACTTTCCGAAAGGGAAGCTAATACTGGA TGGTCCCGAGAGATCACAAGATTTTTCGGGTAAAGATTTATTGCTCGGAGATGAGCCCGC GTCCGATTAGCTAGTTGGTGAGGTAAAGGCTCACCAAGGCGACGATCGGTAGCCGGCCTG AGAGGGTGTTCGGCCACAATGGAACTGAGACACGGTCCATACTCCTACGGGAGGCAGCAG TTAAGAATCTTGCTCAATGGGGGGAACCCTGAAGCAGCGACGCCGCGTGAACGATGAAGG TCTTCGGATTGTAAAGTTCAGTAAGCAGGGAAAAATAAGCAGCAATGTGATGATGGTACC TGCCTAAAGCACCGGCTAACTACGTGCCAGCAG…	ATGCCGATCATTTTTGCTTCGTCTTTGATTTTATTTCCTCAGACGATTATTCAATGGTTA TCTAATAGTAGTCAAGAATGGGCTGGATGGGCAGTGATTATGGATTTTTTTAATCCATTC TCTCAGATTTGGTATCATGCGTTATTTTATTTCGTAATTTATACCGCTTTAATTGTATTC TTTGCTTACTTTTATACAGCGATTCAGTTTAATCCTGCAGAATTGGCTGAGAATTTGAAA AAATACGGTGGGTTCATTCCAGGAATTCGTCCGGGTTCTCACACAAAAGAATACATTGAA AAAGTGTTAAATAGAATCACTCTTCCCGGAGCTATGTTTCTTGCAGGTTTGGCATTAGCA CCTTATATTATTATAAAATTCTTAGATTTGAGC…
35	QSL34	L.interrogans	Australia	Human	CTTTCTATTCCTCAGATTTCTACAGGAGATATTTTACGCGAGGCAGTAAAGAATCAAACT GCGATGGGAATAGAAGCAAAACGTTATATGGATGCGGGAGACTTGGTTCCAGATTCCGTA GTGATTGGAATCATAAAAGATCGCATTCGAGAAGCGGATTGTAAAAATGGATTTTTGTTG GATGGATTTCCGAGAACCGTGGAACAAGCGGAAGCTTTAGATACACTTTTAAAAAATGAA GGCAAGTCTATTGATAAAGCGATTAATCTTCAGGTTCCGGATGCGGAACTCTTAAAGAGA TTACTCGGCCGTGCAGAAATAGAAGGTCGCGCGGACGATAACGAAGTGACGATTAAAAAT CGTCTCGATAATTATAATAAGAAGACCTTACCT…	TATCTCGATATAGAACTGGATTATTATGATTTAGGCGTGGAGTACAGGGACAAAACGGAT GATAAAGTAACCGTGGATTCTGCTCACGCGATTCAAAAATATGGAGTAGGCGTAAAATGT GCGACGATTACTCCTAACCAAGATAGAGTTAAAGAATACAATCTCAAACAAGAATGGAAA TCTCCGAACGGAACCATTCGTTCTATTTTAGACGGAACCGTTTTTCGTAAACCGATCATC GTAAAAAATATTCCTCCTGCGGTTCGTTCTTGGAAAAAACCGATTACAGTAGGACGTCAC GCTTACGGAGATCTTTATAAGGACACAGAACTTTATATTCCCGAAGCCGGAAAGGTGGAA CTCGTTTATACCGGAAAGGACGGAAAAGAAAAA…	ATCTCCGTTGCACTCTTTGCAAGCATTACCGCTTGTGGTGCTTTCGGTGGTCTGCCAAGC CTAAAAAGCTCTTTTGTTCTGAGCGAGGACACAATCCCAGGGACAAACGAAACCGTAAAA ACGTTACTTCCCTACGGATCTGTGATCAACTATTACGGATACGTAAAGCCAGGACAAGCG CCGGACGGTTTAGTCGATGGAAACAAAAAAGCATACTATCTCTATGTTTGGATTCCTGCC GTAATCGCTGAAATGGGAGTTCGTATGATTTCCCCAACAGGCGAAATCGGTGAGCCAGGC GACGGAGACTTAGTAAGCGACGCTTTCAAAGCGGCTACCCCAGAAGAAAAATCAATGCCA CATTGGTTTGATACTTGGATCCGTGTAGAAAGA…	GGAAATTGCGCAGCTACAGTTGATGTAGAATATCCGGTATTCCCGAAAGATAAAGAAGGC CGTGCACTTCAGAAATTCCTCGGAACCATTCGTAACGTAGGTTTGGCTGTTGAAGCTCCT AAAAAAAGTCTTTGGGAAGCAATTTTCGGTGAAGGTTCCAGCTTTATCGATCAGATGCCT TCTAAAGTTTTCGAGGCGTTTGACAAAGAATCTTATTACAAACTTACCGACCTGAGTAAA CGTGCAGACGCAATCAACGAAGCAAGTCTTTCTCTTACAGGAATCACTAAAAATAGAGCG AAGATCGGAAATCTGATTGGAGCGGAAGCATTTCTATACATAGGTTACCAAAAACCTTAT ACAGAGTGTAGTACTGAAAATAAAATCGATGCA…	CACGTGGGTAATCTTCCTCTGAGTCTGGGATAACTTTCCGAAAGGGAAGCTAATACTGGA TGGTCCCGAGAGATCATAAGATTTTTCGGGTAAAGATTTATTGCTCGGAGATGAGCCCGC GTCCGATTAGCTAGTTGGTGAGGTAAAGGCTCACCAAGGCGACGATCGGTAGCCGGCCTG AGAGGGTGTTCGGCCACAATGGAACTGAGACACGGTCCATACTCCTACGGGAGGCAGCAG TTAAGAATCTTGCTCAATGGGGGGAACCCTGAAGCAGCGACGCCGCGTGAACGATGAAGG TCTTCGGATTGTAAAGTTCAGTAAGCAGGGAAAAATAAGCAGCAATGTGATGATGGTACC TGCCTAAAGCACCGGCTAACTACGTGCCAGCAG…	ATGCCGATCATTTTTGCTTCGTCTTTGATTTTATTTCCTCAGACGATTATTCAATGGTTA TCTAATAGTAGTCAAGAATGGGCTGGATGGGCAGTGATTATGGATTTTTTTAATCCATTC TCTCAGATTTGGTACCATGCGTTATTTTATTTCGTAATTTATACTGCTTTTAATTTATTC TTTGCTTACTTTTATACAGCGATTCAGTTTAATCCTGCAGAATTGGCTGAGAATTTGAAA AAATACGGTGGGTTTATTCCAGGAATTCGTCCGGGTTCTCACACAAAAGAATACATTGAA AAAGTGTTAAATAGAATCACTCTTCCCGGAGCGATGTTTCTTGCAGGTTTAGCATTAGCA CCTTATATTATTATAAAATTCTTAGATTTGAGC…
36	QSL35	L.interrogans	Malaysia	Human	CTTTCTATTCCTCAGATTTCTACAGGAGATATTTTACGCGAGGCAGTAAAGAATCAAACT GCGATGGGAATAGAAGCAAAACGTTATATGGATGCGGGAGATTTGGTTCCAGATTCCGTA GTGATTGGAATCATAAAAGATCGCATTCGAGAAGCGGATTGTAAAAATGGATTTTTGTTG GATGGATTTCCGAGAACCGTGGAACAAGCGGAAGCTTTAGATACACTTTTAAAAAATGAA GGCAAGTCTATTGATAAAGCGATTAATCTTCAGGTTCCGGATGCGGAACTCTTAAAGAGA TTACTCGGCCGTGCAGAAATAGAAGGTCGCGCGGACGATACCGAAGTGACGATTAAAAAT CGTCTCGATAATTATAATAAGAAGACCTTACCT…	TATCTCGATATAGAACTGGATTATTATGATTTAGGCGTGGAGTACAGGGACAAAACGGAT GATAAAGTAACTGTGGATTCTGCTCACGCGATTCAAAAATATGGAGTAGGCGTAAAATGT GCGACGATTACTCCTAACCAAGATAGAGTTAAAGAATACAATCTCAAACAAGAATGGAAA TCTCCGAACGGAACCATTCGTTCTATTTTAGACGGAACCGTTTTTCGTAAACCGATCATC GTAAAAAATATTCCTCCTGCGGTTCGTTCTTGGAAAAAACCGATTACAGTAGGACGTCAC GCTTACGGAGATCTTTATAAGGACACAGAACTTTATATTCCCGAAGCCGGAAAGGTGGAA CTCGTTTATACCGGAAAGGACGGAAAAGAAAAA…	ATCTCCGTTGCACTCTTTGCAAGCATTACCGCTTGTGGTGCTTTCGGTGGTCTGCCAAGC CTAAAAAGCTCTTTTGTTCTGAGCGAGGACACAATCCCAGGGACAAACGAAACCGTAAAA ACGTTACTTCCCTACGGATCTGTGATCAACTATTACGGATACGTAAAGCCAGGACAAGCG CCGGACGGTTTAGTCGATGGAAACAAAAAAGCATACTATCTCTATGTTTGGATTCCTGCC GTAATCGCTGAAATGGGAGTTCGTATGATTTCCCCAACAGGCGAAATCGGTGAGCCAGGC GACGGAGACTTAGTAAGCGACGCTTTCAAAGCGGCTACCCCAGAAGAAAAATCAATGCCA CATTGGTTTGATACTTGGATCCGTGTAGAAAGA…	GGAAATTGCGCAGCTACAGTTGATGTAGAATATCCGGTATTCCCGAAAGATAAAGAAGGC CGTGCACTTCAGAAATTCCTCGGAACCATTCGTAACGTAGGTTTGGCTGTTGAAGCTCCT AAAAAAAGTCTTTGGGAAGCAATTTTCGGTGAAGGTTCCAGCTTTATCGATCAGATGCCT TCTAAAGTTTTCGAGGCGTTTGACAAAGAATCTTATTACAAACTTACCGACCTGAGTAAA CGTGCAGACGCAATCAACGAAGCAAGTCTTTCTCTTACAGGAATCACTAAAAATAGAGCG AAGATCGGAAATCTGATTGGAGCGGAAGCATTTCTATACATAGGTTACCAAAAACCTTAT ACAGAGTGTAGTACTGAAAATAAAATCGATGCG…	CACGTGGGTAATCTTCCTCTGAGTCTGGGATAACTTTCCGAAAGGGAAGCTAATACTGGA TGGTCCCGAGAGATCATAAGATTTTTCGGGTAAAGATTTATTGCTCGGAGATGAGCCCGC GTCCGATTAGCTAGTTGGTGAGGTAAAGGCTCACCAAGGCGACGATCGGTAGCCGGCCTG AGAGGGTGTTCGGCCACAATGGAACTGAGACACGGTCCATACTCCTACGGGAGGCAGCAG TTAAGAATCTTGCTCAATGGGGGGAACCCTGAAGCAGCGACGCCGCGTGAACGATGAAGG TCTTCGGATTGTAAAGTTCAGTAAGCAGGGAAAAATAAGCAGCAATGTGATGATGGTACC TGCCTAAAGCACCGGCTAACTACGTGCCAGCAG…	ATGCCGATCATTTTTGCTTCGTCTTTGATTTTATTTCCTCAGACGATTATTCAATGGTTA TCTAATAGTAGTCAAGAATGGGCTGGATGGGCAGTGATTATGGATTTTTTTAATCCATTC TCTCAGATTTGGTACCATGCGTTATTTTATTTCGTAATTTATACTGCTTTTAATTTATTC TTTGCTTACTTTTATACAGCGATTCAGTTTAATCCTGCAGAATTGGCTGAGAATTTGAAA AAATACGGTGGGTTTATTCCAGGAATTCGTCCGGGTTCTCACACAAAAGAATACATTGAA AAAGTGTTAAATAGAATCACTCTTCCCGGAGCGATGTTTCTTGCAGGTTTAGCATTAGCA CCTTATATTATTATAAAATTCTTAGATTTGAGC…
37	QSL36	L.interrogans	Malaysia	Human	CTTTCTATTCCTCAGATTTCTACGGGAGATATTTTACGCGAGGCAGTAAAGAATCAAACT GCGATGGGAATAGAAGCAAAACGTTATATGGATGCGGGAGATTTGGTTCCAGATTCCGTA GTGATTGGAATCATAAAAGATCGCATTCGAGAAGCGGATTGTAAAAATGGATTTTTGTTG GATGGATTTCCGAGAACCGTGGAACAAGCGGAAGCTTTAGATACACTTTTAAAAAATGAA GGCAAGTCTATTGATAAAGCGATTAATCTTCAGGTTCCGGATGCGGAACTCTTAAAGAGA TTACTCGGCCGTGCAGAAATAGAAGGTCGCGCGGACGATAACGAAGTGACGATTAAAAAT CGTCTCGATAATTATAATAAGAAGACCTTACCT…	TATCTCGATATAGAACTGGATTATTATGATTTAGGCGTGGAGTACAGGGACAAAACGGAT GATAAAGTAACCGTGGATTCTGCTCACGCGATTCAAAAATATGGAGTAGGCGTAAAATGT GCGACGATTACTCCTAACCAAGATAGAGTTAAAGAATACAATCTCAAACAAGAATGGAAA TCTCCGAACGGAACCATTCGTTCTATTTTAGACGGAACCGTTTTTCGTAAACCGATCATC GTAAAAAATATTCCTCCTGCGGTTCGTTCTTGGAAAAAACCGATTACAGTAGGACGTCAC GCTTACGGAGATCTTTATAAGGACACAGAACTTTATATTCCCGAAGCCGGAAAGGTGGAA CTCGTTTATACCGGAAAGGACGGAAAAGAAAAA…	ATCTCCGTTGCACTCTTTGCAAGCATTACCGCTTGTGGTGCTTTCGGTGGTCTGCCAAGC CTAAAAAGCTCTTTTGTTCTGAGCGAGGACACAATCCCAGGGACAAACGAAACCGTAAAA ACGTTACTTCCCTACGGATCTGTGATCAACTATTACGGATACGTAAAGCCAGGACAAGCG CCGGACGGTTTAGTCGATGGAAACAAAAAAGCATACTATCTCTATGTTTGGATTCCTGCC GTAATCGCTGAAATGGGAGTTCGTATGATTTCCCCAACAGGCGAAATCGGTGAGCCAGGC GACGGAGACTTAGTAAGCGACGCTTTCAAAGCGGCTACCCCAGAAGAAAAATCAATGCCA CATTGGTTTGATACTTGGATCCGTGTAGAAAGA…	GGAAATTGCGCAGCTACAGTTGATGTAGAATATCCGGTATTCCCGAAAGATAAAGAAGGC CGTGCACTTCAGAAATTCCTCGGAACCATTCGTAACGTAGGTTTGGCTGTTGAAGCTCCT AAAAAAAGTCTTTGGGAAGCAATTTTCGGTGAAGGTTCCAGCTTTATCGATCAGATGCCT TCTAAAGTTTTCGAGGCGTTTGACAAAGAATCTTATTACAAACTTACCGACCTAAGCAAA CGTGCAGACGCAATCAACGAAGCAAGTCTTTCTCTTACAGGAATCACTAAAAATAGAGCG AAGATCGGAAATCTGATTGGAGCGGAAGCATTTCTATACATAGGTTACCAAAAACCTTAT ACAGAGTGTAGTACTGAAAATAAAATCGATGCG…	CACGTGGGTAATCTTCCTCTGAGTCTGGGATAACTTTCCGAAAGGGAAGCTAATACTGGA TGGTCCCGAGAGATCACAAGATTTTTCGGGTAAAGATTTATTGCTCGGAGATGAGCCCGC GTCCGATTAGCTAGTTGGTGAGGTAAAGGCTCACCAAGGCGACGATCGGTAGCCGGCCTG AGAGGGTGTTCGGCCACAATGGAACTGAGACACGGTCCATACTCCTACGGGAGGCAGCAG TTAAGAATCTTGCTCAATGGGGGGAACCCTGAAGCAGCGACGCCGCGTGAACGATGAAGG TCTTCGGATTGTAAAGTTCAGTAAGCAGGGAAAAATAAGCAGCAATGTGATGATGGTACC TGCCTAAAGCACCGGCTAACTACGTGCCAGCAG…	ATGCCGATCATTTTTGCTTCGTCTTTGATTTTATTTCCTCAGACGATTATTCAATGGTTA TCTAATAGTAGTCAAGAATGGGCTGGATGGGCAGTGATTATGGATTTTTTTAATCCATTC TCTCAGATTTGGTACCATGCGTTATTTTATTTCGTAATTTATACTGCTTTTAATTTATTC TTTGCTTACTTTTATACAGCGATTCAGTTTAATCCTGCAGAATTGGCTGAGAATTTGAAA AAATACGGTGGGTTTATTCCAGGAATTCGTCCGGGTTCTCACACAAAAGAATACATTGAA AAAGTGTTAAATAGAATCACTCTTCCCGGAGCGATGTTTCTTGCAGGTTTAGCATTAGCA CCTTATATTATTATAAAATTCTTAGATTTGAGC…
38	QSL45	L.interrogans	Indonesia	Human	CTTTCTATTCCTCAGATTTCTACAGGAGATATTTTACGCGAGGCAGTCAAAGATCAAACT GCGATGGGAATAGAAGCAAAACGTTATATGGATGCGGGAGATTTGGTTCCAGATTCCGTA GTGATTGGAATCATAAAAGATCGCATTCGAGAAGCGGATTGTAAAAATGGATTTTTGTTG GATGGATTTCCGAGAACCGTGGAACAAGCGGAAGCTTTAGATACACTTTTAAAAAATGAA GGCAAGTCTATTGATAAAGCGATTAATCTTCAGGTTCCGGATGCGGAACTCTTAAAGAGA TTACTCGGCCGTGCAGAAATAGAAGGTCGCGCGGACGATAACGAAGTGACGATTAAAAAT CGTCTCGATAATTATAATAAGAAGACCTTACCT…	TATCTCGATATAGAACTGGATTATTATGATTTAGGCGTGGAGTACAGGGACAAAACGGAT GATAAAGTAACCGTGGATTCTGCTCACGCGATTCAAAAATATGGAGTAGGCGTAAAATGT GCGACGATTACTCCTAACCAAGATAGAGTTAAAGAATACAATCTCAAACAAGAATGGAAA TCTCCGAACGGAACCATTCGTTCTATTTTAGACGGAACCGTTTTTCGTAAACCGATCATC GTAAAAAATATTCCTCCTGCGGTTCGTTCTTGGAAAAAACCGATTACAGTAGGACGTCAC GCTTACGGAGATCTTTATAAGGACACAGAACTTTATATTCCCGAAGCCGGAAAGGTGGAA CTCGTTTATACCGGAAAGGACGGAAAAGAAAAA…	ATCTCCGTTGCACTCTTTGCAAGCATTACCGCTTGTGGTGCTTTCGGTGGTCTGCCAAGC CTAAAAAGCTCTTTTGTTCTGAGCGAGGACACAATCCCAGGGACAAACGAAACCGTAAAA ACGTTACTTCCCTACGGATCTGTGATCAACTATTACGGATACGTAAAGCCAGGACAAGCG CCGGACGGTTTAGTCGATGGAAACAAAAAAGCATACTATCTCTATGTTTGGATTCCTGCC GTAATCGCTGAAATGGGAGTTCGTATGATTTCCCCAACAGGCGAAATCGGTGAGCCAGGC GACGGAGACTTAGTAAGCGACGCTTTCAAAGCGGCTACCCCAGAAGAAAAATCAATGCCA CATTGGTTTGATACTTGGATCCGTGTAGAAAGA…	GGAAATTGCGCAGCTACAGTTGATGTAGAATATCCGGTATTCCCGAAAGATAAAGAAGGC CGTGCACTTCAGAAATTCCTCGGAACCATTCGTAACGTAGGTTTGGCTGTTGAAGCTCCT AAAAAAAGTCTTTGGGAAGCAATTTTCGGTGAAGGTTCCAGCTTTATCGATCAGATGCCT TCTAAAGTTTTCGAGGCGTTTGACAAAGAATCTTATTACAAACTTACCGACCTGAGTAAA CGTGCAGACGCAATCAACGAAGCAAGTCTTTCTCTTACAGGAATCACTAAAAATAGAGCG AAGATCGGAAATCTGATTGGAGCGGAAGCAATTCTATACATAGGTTACCAAAAACCTTAT ACAGAGTGTAGTACTGAAAATAAAATCGATGCA…	CACGTGGGTAATCTTCCTCTGAGTCTGGGATAACTTTCCGAAAGGGAAGCTAATACTGGA TGGTCCCGAGAGATCATAAGATTTTTCGGGTAAAGATTTATTGCTCGGAGATGAGCCCGC GTCCGATTAGCTAGTTGGTGAGGTAAAGGCTCACCAAGGCGACGATCGGTAGCCGGCCTG AGAGGGTGTTCGGCCACAATGGAACTGAGACACGGTCCATACTCCTACGGGAGGCAGCAG TTAAGAATCTTGCTCAATGGGGGGAACCCTGAAGCAGCGACGCCGCGTGAACGATGAAGG TCTTCGGATTGTAAAGTTCAGTAAGCAGGGAAAAATAAGCAGCGATGTGATGATGGTACC TGCCTAAAGCACCGGCTAACTACGTGCCAGCAG…	ATGCCGATCATTTTTGCTTCGTCTTTGATTTTATTTCCTCAGACGATTATTCAATGGTTA TCTAATAGTAGTCAAGAATGGGCTGGATGGGCAGTGATTATGGATTTTTTAAATCCATTC TCTCAGATTTGGTATCATGCGTTATTTTATTTCGTAATTTATACCGCTTTAATTGTATTC TTTGCTTACTTTTATACAGCGATTCAGTTTAATCCTGCAGAATTGGCTGAGAATTTGAAA AAATACGGTGGGTTCATTCCAGGAATTCGTCCGGGTTCTCACACAAAAGAATACATTGAA AAAGTGTTAAATAGAATCACTCTTCCCGGAGCTATGTTTCTTGCAGGTTTGGCATTAGCA CCTTATATTATTATAAAATTCTTAGATTTGAGC…
39	QSL46	L.interrogans	Malaysia	Human	CTTTCTATTCCTCAGATTTCTACAGGAGATATTTTACGCGAGGCAGTAAAAAATCAAACT GCGATGGGAATAGAAGCAAAACGTTATATGGATGCGGGAGATTTGGTTCCAGATTCCGTA GTGATTGGAATCATAAAAGATCGCATTCGAGAAGCGGATTGTAAAAATGGATTTTTGTTG GATGGATTTCCGAGAACCGTGGAACAAGCGGAAGCTTTAGATACACTTTTAAAAAATGAA GGCAAGTCTATTGATAAAGCGATTAATCTTCAGGTTCCGGATGCGGAACTCTTAAAGAGA TTACTCGGCCGTGCAGAAATAGAAGGTCGCGCGGACGATACCGAAGTGACGATTAAAAAT CGTCTCGATAATTATAATAAGAAGACCTTACCT…	TATCTCGATATAGAACTGGATTATTATGATTTAGGCGTGGAGTACAGGGACAAAACGGAT GATAAAGTAACCGTGGATTCTGCTCACGCGATTCAAAAATATGGAGTAGGCGTAAAATGT GCGACGATTACTCCTAACCAAGATAGAGTTAAAGAATACAATCTCAAACAAGAATGGAAA TCTCCGAACGGAACCATTCGTTCTATTTTAGACGGAACCGTTTTTCGTAAACCGATCATC GTAAAAAATATTCCTCCTGCGGTTCGTTCTTGGAAAAAACCGATTACAGTAGGACGTCAC GCTTACGGAGATCTTTATAAGGACACAGAACTTTATATTCCCGAAGCCGGAAAGGTGGAA CTCGTTTATACCGGAAAGGACGGAAAAGAAAAA…	ATCTCCGTTGCACTCTTTGCAAGCATTACCGCTTGTGGTGCTTTCGGTGGTCTGCCAAGC CTAAAAAGCTCTTTTGTTCTGAGCGAGGACACAATCCCAGGGACAAACGAAACCGTAAAA ACGTTACTTCCCTACGGATCTGTGATCAACTATTACGGATACGTAAAGCCAGGACAAGCG CCGGACGGTTTAGTCGATGGAAACAAAAAAGCATACTATCTCTATGTTTGGATTCCTGCC GTAATCGCTGAAATGGGAGTTCGTATGATTTCCCCAACAGGCGAAATCGGTGAGCCAGGC GACGGAGACTTAGTAAGCGACGCTTTCAAAGCGGCTACCCCAGAAGAAAAATCAATGCCA CATTGGTTTGATACTTGGATCCGTGTAGAAAGA…	GGAAATTGCGCAGCTACAGTTGATGTAGAATATCCGGTATTCCCGAAAGATAAAGAAGGC CGTGCACTTCAGAAATTCCTCGGAACCATTCGTAACGTAGGTTTGGCTGTTGAAGCTCCT AAAAAAAGTCTTTGGGAAGCAATTTTCGGTGAAGGTTCCAGCTTTATCGATCAGATGCCT TCTAAAGTTTTCGAGGCGTTTGACAAAGAATCTTATTACAAACTTACCGACCTGAGTAAA CGTGCAGACGCAATCAACGAAGCAAGTCTTTCTCTTACAGGAATCACTAAAAATAGAGCG AAGATCGGAAATCTGATTGGAGCGGAAGCAATTCTATACATAGGTTACCAAAAACCTTAT ACAGAGTGTAGTACTGAAAATAAAATCGATGCG…	CACGTGGGTAATCTTCCTCTGAGTCTGGGATAACTTTCCGAAAGGGAAGCTAATACTGGA TGGTCCCGAGAGATCATAAGATTTTTCGGGTAAAGATTTATTGCTCGGAGATGAGCCCGC GTCCGATTAGCTAGTTGGTGAGGTAAAGGCTCACCAAGGCGACGATCGGTAGCCGGCCTG AGAGGGTGTTCGGCCACAATGGAACTGAGACACGGTCCATACTCCTACGGGAGGCAGCAG TTAAGAATCTTGCTCAATGGGGGGAACCCTGAAGCAGCGACGCCGCGTGAACGATGAAGG TCTTCGGATTGTAAAGTTCAGTAAGCAGGGAAAAATAAGCAGCAATGTGATGATGGTACC TGCCTAAAGCACCGGCTAACTACGTGCCAGCAG…	ATGCCGATCATTTTTGCTTCGTCTTTGATTTTATTTCCTCAGACGATTATTCAATGGTTA TCTAATAGTAGTCAAGAATGGGCTGGATGGGCAGTGATTATGGATTTTTTAAATCCATTC TCTCAGATTTGGTATCATGCGTTATTTTATTTCGTAATTTATACCGCTTTAATTGTATTC TTTGCTTACTTTTATACAGCGATTCAGTTTAATCCTGCAGAATTGGCTGAGAATTTGAAA AAATACGGTGGGTTCATTCCAGGAATTCGTCCGGGTTCTCACACAAAAGAATACATTGAA AAAGTGTTAAATAGAATCACTCTTCCCGGAGCTATGTTTCTTGCAGGTTTGGCATTAGCA CCTTATATTATTATAAAATTCTTAGATTTGAGC…
40	QSL47	L.interrogans	Peru	Opossum	CTTTCTATTCATCAGATTTCTACAGGAGATATTTTACGCGATGCCGTAAAAAATCAAACC GCGATGGGAATGGAAGCAAAACGTTATATGGATGCGGGAGATTTAGTTCCCGATTCCGTA GTGATTGGAATTATAAAAGATCGTATTCGAGAAGCGGATTGTAAAAATGGATTTTTATTG GATGGATTTCCGAGAACTGTGGAACAAGCGGAAGCTTTAGATATACTTTTAAAAAATGAA GGCAAGTCCATTGATAAAGCGATCAATCTTCAGGTTCCGGATGCGGAACTCTTAAAAAGA CTACTCAGCCGCGCAGAAATTGAAGGTCGCGCGGATGATAACGAAGTGACGATTAAAAAT CGTCTGGATAATTATAACAAGAAGACCTTACCT…	TATCTCGATATAGAACTGGACTATTATGATTTAGGCGTGGAATACAGGGACAAAACGGAC GATAAAGTAACTGTGGATTCCGCTCATGCGATTCAAAAATACGGAGTAGGCGTAAAATGT GCGACGATCACTCCCAATCAAGACAGAGTTAAGGAATACAATCTCAAACAAGAATGGAAA TCTCCAAACGGAACCATTCGTTCCATTTTAGATGGAACCGTTTTTCGTAAACCGATCATT GTAAAAAACATTCCACCTGCGGTTCGTTCTTGGAAAAAACCGATTACGGTCGGACGTCAT GCTTATGGAGACCTTTATAAGGATACCGAACTTTATATTCCCGAAGCGGGAAAGGTGGAG TTGGTTTATACCGGAAAAGATGGAAAAGAAAAA…	ATCTCCGTTGCACTCTTTGCAAGCATTACCGCTTGTGGTGCTTTCGGTGGTCTGCCAAGC CTAAAAAGCTCTTTTGTTCTGAGCGAGGACACAATCCCAGGGACAAACGAAACCGTAAAA ACGTTACTTCCCTACGGATCTGTGATCAACTATTACGGATACGTAAAGCCAGGACAAGCG CCGGACGGTTTAGTCGATGGAAACAAAAAAGCATACTATCTCTATGTTTGGATTCCTGCC GTAATCGCTGAAATGGGAGTTCGTATGATTTCCCCAACAGGCGAAATCGGTGAGCCAGGC GATGGAGACTTAGTAAGCGACGCTTTCAAAGCGGCAACCCCAGAAGAAAAATCAATGCCA CATTGGTTTGATACTTGGATCCGTGTAGAAAGA…	GGAAATTGCGCAGCTACAGTTGATGTAGAATATCCGGTATTCCCGAAAGATAAAGAAGGC CGTGCACTTCAGAAATTTCTCGGAACCATTCGTAACGTAGGTTTGGCTGTTGAAGCTCCT AAAAAAAGTCTTTGGGAAGCGATCTTTGGTGAAGGTTCTAGTTTCATCGATCAAATGCCT TCTAAAGTTTTCGAAGCGTTTGACAAAGAGTCTTATTACAAACTTACCGACCTAAGCAAA CGCGCGGACGCAATCAACGAAGCGAGTCTTTCTCTTACAGGAATCACTAAAAATAGAGCG AAGATCGGAAATCTAATCGGAGCGGAAGCAATCCTATACATAGGTTATCAAAAACCTTAT ACTGAGTGTAGTACTGAAAATAAAATCGATGCG…	CACGTGGGTAATCTTCCTCCGAGTCTGGGATAACTTTCCGAAAGGGAAGCTAATACTGGA TAGCCCCGAGAGATCATAAGATTTTTCGGGTAAAGATTCATTGCTCGGAGATGAGCCCGC GTCCGATTAGCTAGTTGGTGAGGTAATGGCTCACCAAGGCGACGATCGGTAGCCGGCCTG AGAGGGTGTTCGGCCACAATGGAACTGAGACACGGTCCATACTCCTACGGGAGGCAGCAG TTAAGAATCTTGCTCAATGGGGGGAACCCTGAAGCAGCGACGCCGCGTGAACGATGAAGG TCTTCGGATTGTAAAGTTCAGTAAGCAGGGAAAAATAAGCAGCAATGTGATGATGGTACC TGCCTAAAGCACCGGCTAACTACGTGCCAGCAG…	ATGCCGATCATTTTTGCTTCGTCTTTGATTTTATTTCCTCAGACGATTATTCAATGGTTA TCTAATAGTAGTCAAGAATGGGCTGGATGGGCAGTGATTATGGATTTTTTAAATCCATTC TCTCAGATTTGGTATCATGCGTTATTTTATTTCGTAATTTATACCGCTTTAATTGTATTC TTTGCTTACTTTTATACAGCGATTCAGTTTAATCCTGCAGAATTGGCTGAGAATTTGAAA AAATACGGTGGGTTCATTCCAGGAATTCGTCCGGGTTCTCACACAAAAGAATACATTGAA AAAGTGTTAAATAGAATCACTCTTCCCGGAGCTATGTTTCTTGCAGGTTTGGCATTAGCA CCTTATATTATTATAAAATTCTTAGATTTGAGC…
41	QSL48	L.interrogans	Indonesia	Human	CTTTCTATTCCTCAGATTTCTACAGGAGATATTTTACGCGAGGCAGTAAAGAATCAAACT GCGATGGGAATAGAAGCAAAACGTTATATGGATGCGGGAGATTTGGTTCCAGATTCCGTA GTGATTGGAATCATAAAAGATCGCATTCGAGAAGCGGATTGTAAAAATGGATTTTTGTTG GATGGATTTCCGAGAACCGTGGAACAAGCGGAAGCTTTAGATACACTTTTAAAAAATGAA GGCAAGTCTATTGATAAAGCGATTAATCTTCAGGTTCCGGATGCGGAACTCTTAAAGAGA TTACTCGGCCGTGCAGAAATAGAAGGTCGCGCGGACGATAACGAAGTGACGATTAAAAAT CGTCTCGATGATTATAATAAGAAGACCTTACCT…	TATCTCGATATAGAACTGGATTATTATGATTTAGGCGTGGAGTACAGGGACAAAACGGAT GATAAAGTAACCGTGGATTCTGCTCACGCGATTCAAAAATATGGAGTAGGCGTAAAATGT GCGACGATTACTCCTAACCAAGATAGAGTTAAAGAATACAATCTCAAACAAGAATGGAAA TCTCCGAACGGAACCATTCGTTCTATTTTAGACGGAACCGTTTTTCGTAAACCGATCATC GTAAAAAATATTCCTCCTGCGGTTCGTTCTTGGAAAAAACCGATTACAGTAGGACGTCAC GCTTACGGAGATCTTTATAAGGACACAGAACTTTATATTCCCGAAGCCGGAAAGGTGGAA CTCGTTTATACCGGAAAGGACGGAAAAGAAAAA…	ATCTCCGTTGCACTCTTTGCAAGCATTACCGCTTGTGGTGCTTTCGGTGGTCTGCCAAGC CTAAAAAGCTCTTTTGTTCTGAGCGAGGACACAATCCCAGGGACAAACGAAACCGTAAAA ACGTTACTTCCCTACGGATCTGTGATCAACTATTACGGATACGTAAAGCCAGGACAAGCG CCGGACGGTTTAGTCGATGGAAACAAAAAAGCATACTATCTCTATGTTTGGATTCCTGCC GTAATCGCTGAAATGGGAGTTCGTATGATTTCCCCAACAGGCGAAATCGGTGAGCCAGGC GACGGAGACTTAGTAAGCGACGCTTTCAAAGCGGCTACCCCAGAAGAAAAATCAATGCCA CATTGGTTTGATACTTGGATCCGTGTAGAAAGA…	GGAAATTGCGCAGCTACAGTTGATGTAGAATATCCGGTATTCCCGAAAGATAAAGAAGGC CGTGCACTTCAGAAATTCCTCGGAACCATTCGTAACGTAGGTTTGGCTGTTGAAGCTCCT AAAAAAAGTCTTTGGGAAGCAATTTTCGGTGAAGGTTCCAGCTTTATCGATCAGATGCCT TCTAAAGTTTTCGAGGCGTTTGACAAAGAATCTTATTACAAACTTACCGACCTGAGTAAA CGTGCAGACGCAATCAACGAAGCAAGTCTTTCTCTTACAGGAATCACTAAAAATAGAGCG AAGATCGGAAATCTGATTGGAGCGGAAGCAATTCTATACATAGGTTACCAAAAACCTTAT ACAGAGTGTAGTACTGAAAATAAAATCGATGCA…	CACGTGGGTAATCTTCCTCTGAGTCTGGGATAACTTTCCGAAAGGGAAGCTAATACTGGA TGGTCCCGAGAGATCATAAGATTTTTCGGGTAAAGATTTATTGCTCGGAGATGAGCCCGC GTCCGATTAGCTAGTTGGTGAGGTAAAGGCTCACCAAGGCGACGATCGGTAGCCGGCCTG AGAGGGTGTTCGGCCACAATGGAACTGAGACACGGTCTATTCTCCTACGGGAGGCAGCAG TTAAGAATCTTGCTCAATGGGGGGAACCCTGAAGCAGCGACGCCGCGTGAACGATGAAGG TCTTCGGATTGTAAAGTTCAGTAAGCAGGGAAAAATAAGCAGCAATGTGATGATGGTACC TGCCTAAAGCACCGGCTAACTACGTGCCAGCAG…	ATGCCGATCATTTTTGCTTCGTCTTTGATTTTATTTCCTCAGACGATTATTCAATGGTTA TCTAATAGTAGTCAAGAATGGGCTGGATGGGCAGTGATTATGGATTTTTTAAATCCATTC TCTCAGATTTGGTATCATGCGTTATTTTATTTCGTAATTTATACCGCTTTAATTGTATTC TTTGCTTACTTTTATACAGCGATTCAGTTTAATCCTGCAGAATTGGCTGAGAATTTGAAA AAATACGGTGGGTTCATTCCAGGAATTCGTCCGGGTTCTCACACAAAAGAATACATTGAA AAAGTGTTAAATAGAATCACTCTTCCCGGAGCTATGTTTCTTGCAGGTTTGGCATTAGCA CCTTATATTATTATAAAATTCTTAGATTTGAGC…
42	QSL51	L.interrogans	Malaysia	Rattus muelleri	CTTTCTATTCCTCAGATTTCTACAGGAGATATTTTACGCGAGGCAGTAAAGAATCAAACT GCGATGGGAATAGAAGCAAAACGTTATATGGATGCGGGAGATTTGGTTCCAGATTCCGTA GTGATTGGAATCATAAAAGATCGCATTCGAGAAGCGGATTGTAAAAATGGATTTTTGTTG GATGGATTTCCGAGAACCGTGGAACAAGCGGAAGCTTTAGATACACTTTTAAAAAATGAA GGCAAGTCTATTGATAAAGCGATTAATCTTCAGGTTCCGGATGCGGAACTCTTAAAGAGA TTACTCGGCCGTGCAGAAATAGAAGGTCGCGCGGACGATAACGAAGTGACGATTAAAAAT CGTCTCGATAATTATAATAAGAAGACCTTACCT…	TATCTCGATATAGAACTGGATTATTATGATTTAGGCGTGGAGTACAGGGACAAAACGGAT GATAAAGTAACCGTGGATTCTGCTCACGCGATTCAAAAATATGGAGTAGGCGTAAAATGT GCGACGATTACTCCTAACCAAGATAGAGTTAAAGAATACAATCTCAAACAAGAATGGAAA TCTCCGAACGGAACCATTCGTTCTATTTTAGACGGAACCGTTTTTCGTAAACCGATCATC GTAAAAAATATTCCTCCTGCGGTTCGTTCTTGGAAAAAACCGATTACAGTAGGACGTCAC GCTTACGGAGATCTTTATAAGGACACAGAACTTTATATTCCCGAAGCCGGAAAGGTGGAA CTCGTTTATACCGGAAAGGACGGAAAAGAAAAA…	ATCTCCGTTGCACTCTTTGCAAGCATTACCGCTTGTGGTGCTTTCGGTGGTCTGCCAAGC CTAAAAAGCTCTTTTGTTCTGAGCGAGGACACAATCCCAGGGACAAACGAAACCGTAAAA ACGTTACTTCCCTACGGATCTGTGATCAACTATTACGGATACGTAAAGCCAGGACAAGCG CCGGACGGTTTAGTCGATGGAAACAAAAAAGCATACTATCTCTATGTTTGGATTCCTGCC GTAATCGCTGAAATGGGAGTTCGTATGATTTCCCCAACAGGCGAAATCGGTGAGCCAGGC GACGGAGACTTAGTAAGCGACGCTTTCAAAGCGGCTACCCCAGAAGAAAAATCAATGCCA CATTGGTTTGATACTTGGATCCGTGTAGAAAGA…	GGAAATTGCGCAGCTACAGTTGATGTAGAATATCCGGTATTCCCGAAAGATAAAGAAGGC CGTGCACTTCAGAAATTCCTCGGAACCATTCGTAACGTAGGTTTGGCTGTTGAAGCTCCT AAAAAAAGTCTTTGGGAAGCAATTTTCGGTGAAGGTTCCAGCTTTATCGATCAGATGCCT TCTAAAGTTTTCGAGGCGTTTGACAAAGAATCTTATTACAAACTTACCGACCTGAGTAAA CGTGCAGACGCAATCAACGAAGCAAGTCTTTCTCTTACAGGAATCACTAAAAATAGAGCG AAGATCGGAAATCTGATTGGAGCGGAAGCAATTCTATACATAGGTTACCAAAAACCTTAT ACAGAGTGTAGTACTGAAAATAAAATCGATGCA…	CACGTGGTTAATCTTCCTCCGAGTCTGGGATAACTTTCCGAAAGGGAAGCTAATACTGGA TAGTCCCGAGAGATCATAAGATTTTTCGGGTAAAGATTCATTGCTCGGAGATGAGCCCGC GTCCGATTAGCTAGTTGGTGAGGTAATGGCTCACCAAGGCGACGATCGGTAGCCGGCCTG AGAGGGTGTTCGGCCACAATGGAACTGAGACACGGTCCATACTCCTACGGGAGGCAGCAG TTAAGAATCTTGCTCAATGGGGGGAACCCTGAAGCAGCGACGCCGCGTGAACGATGAAGG TCTTCGGATTGTAAAGTTCAGTAAGCAGGGAAAAATAAGCAGCAATGTGATGATGGTACC TGCCTAAAGCACCGGCTAACTACGTGCCAGCAG…	ATGCCGATCATTTTTGCTTCGTCTTTGATTTTATTTCCTCAGACGATTATCCAATGGTTA TCTAATAGTAGTCAAGAATGGGCTGGATGGGCAGTGATTATGGATTTTTTTAATCCATTC TCTCAGATTTGGTATCATGCGTTATTTTATTTCGTAATTTATACCGCTTTAATTGTATTC TTTGCTTACTTCTATACAGCGATTCAGTTTAATCCTGCAGAATTGGCTGAGAATTTGAAA AAATACGGTGGGTTCATTCCAGGAATTCGTCCGGGTTCTCACACAAAAGAATACATTGAA AAAGTGTTAAATAGAATCACTCTTCCCGGAGCTATGTTTCTTGCAGGTTTGGCATTAGCA CCTTATATTATTATAAAATTCTTAGATTTGAGC…
43	QSL54	L.interrogans	Sri Lanka	Human	CTTTCTATTCCTCAGATTTCTACAGGAGATATTTTACGCGAGGCAGTAAAGAATCAAACT GCGATGGGAATAGAAGCAAAACGTTATATGGATGCGGGAGATTTGGTTCCAGATTCCGTA GTGATTGGAATCATAAAAGATCGCATTCGAGAAGCGGATTGTAAAAATGGATTTTTGTTG GATGGATTTCCGAGAACCGTGGAACAAGCGGAAGCTTTAGATACACTTTTAAAAAATGAA GGCAAGTCTATTGATAAAGCGATTAATCTTCAGGTTCCGGATGCGGAACTCTTAAAGAGA TTACTCGGCCGTGCAGAAATAGAAGGTCGCGCGGACGATAACGAAGTGACGATTAAAAAT CGTCTCGATAATTATAATAAGAAGACCTTACCT…	TATCTCGATATAGAACTGGATTATTATGATTTAGGCGTGGAGTACAGAGACAAAACGGAT GATAAAGTAACCGTGGATTCTGCTCACGCGATTCAAAAATATGGAGTAGGCGTAAAATGT GCGACGATTACTCCTAACCAAGATAGAGTTAAAGAATACAATCTCAAACAAGAATGGAAA TCTCCGAACGGAACCATTCGTTCTATTTTAGACGGAACCGTTTTTCGTAAACCGATCATC GTAAAAAATATTCCTCCTGCGGTTCGTTCTTGGAAAAAACCGATTACAGTAGGACGTCAC GCTTACGGAGATCTTTATAAGGACACAGAACTTTATATTCCCGAAGCCGGAAAGGTGGAA CTCGTTTATACCGGAAAGGACGGAAAAGAAAAA…	ATCTCCGTTGCACTCTTTGCAAGCATTACCGCTTGTGGTGCTTTCGGTGGTCTGCCAAGC CTAAAAAGCTCTTTTGTTCTGAGCGAGGACACAATCCCAGGGACAAACGAAACCGTAAAA ACGTTACTTCCCTACGGATCTGTGATCAACTATTACGGATACGTAAAGCCAGGACAAGCG CCGGACGGTTTAGTCGATGGAAACAAAAAAGCATACTATCTCTATGTTTGGATTCCTGCC GTAATCGCTGAAATGGGAGTTCGTATGATTTCCCCAACAGGCGAAATCGGTGAACCAGGC GACGGAGACTTAGTAAGCGACGCTTTCAAAGCGGCTACCCCAGAAGAAAAATCAATGCCA CATTGGTTTGATACTTGGATCCGTGTAGAAAGA…	GGAAATTGCGCAGCTACAGTTGATGTAGAATATCCGGTATTCCCGAAAGATAAAGAAGGC CGTGCACTTCAGAAATTCCTCGGAACCATTCGTAACGTAGGTTTGGCCGTTGAAGCTCCT AAAAAAAGTCTTTGGGAAGCAATTTTCGGTGAAGGTTCCAGCTTTATCGATCAGATGCCT TCTAAAGTTTTCGAGGCGTTTGACAAAGAATCTTATTACAAACTTACCGACCTAAGCAAA CGTGCAGACGCAATCAACGAAGCAAGTCTTTCTCTTACAGGAATCACTAAAAATAGAGCG AAGATCGGAAATCTGATTGGAGCGGAAGCAATTCTATACATAGGTTACCAAAAACCTTAT ACAGAGTGTAGTACTGAAAATAAAATCGATGCG…	CACGTGGGTAATCTTCCTCTGAGTCTGGGATAACTTTCCGAAAGGGAAGCTAATACTGGA TGGTCCCGAGAGATCATAAGATTTTTCGGGTAAAGATTTATTGCTCGGAGATGAGCCCGC GTCCGATTAGCTAGTTGGTGAGGTAAAGGCTCACCAAGGCGACGATCGGTAGCCGGCCTG AGAGGGTGTTCGGCCACAATGGAACTGAGACACGGTCCATACTCCTACGGGAGGCAGCAG TTAAGAATCTTGCTCAATGGGGGGAACCCTGAAGCAGCGACGCCGCGTGAACGATGAAGG TCTTCGGATTGTAAAGTTCAGTAAGCAGGGAAAAATAAGCAGCAATGTGATGATGGTACC TGCCTAAAGCACCGGCTAACTACGTGCCAGCAG…	ATGCCGATCATTTTTGCTTCGTCTTTGATTTTATTTCCTCAGACGATTATTCAATGGTTA TCTAATAGTAGTCAAGAATGGGCTGGATGGGCAGTGATTATGGATTTTTTTAATCCATTC TCTCAGATTTGGTATCATGCGTTATTTTATTTCGTAATTTATACCGCTTTAATTGTATTC TTTGCTTACTTTTATACAGCGATTCAGTTTAATCCTGCAGAATTGGCTGAGAATTTGAAA AAATACGGTGGATTCATTCCAGGAATTCGTCCGGGTTCTCACACAAAAGAATACATTGAA AAAGTGTTAAATAGAATCACTCTCCCTGGAGCTATGTTTCTTGCAGGTTTGGCATTAGCA CCTTATATTATTATAAAATTCTTAGATTTGAGC…
44	QSL55	L.interrogans	Korea	Field mouse	CTTTCTATTCCTCAGATTTCTACAGGAGATATTTTACGCGAGGCAGTAAAGAATCAAACT GCGATGGGAATAGAAGCAAAACGTTATATGGATGCGGGAGATTTGGTTCCAGATTCCGTA GTGATTGGAATCATAAAAGATCGCATTCGAGAAGCGGATTGTAAAAATGGATTTTTGTTG GATGGATTTCCGAGAACCGTGGAACAAGCGGAAGCTTTAGATACACTTTTAAAAAATGAA GGCAAGTCTATTGATAAAGCGATTAATCTTCAGGTTCCGGATGCGGAACTCTTAAAGAGA TTACTCGGCCGTGCAGAAATAGAAGGTCGCGCGGACGATAACGAAGTGACGATTAAAAAT CGTCTCGATAATTATAATAAGAAGACCTTACCT…	TATCTCGATATAGAACTGGATTATTATGATTTAGGCGTGGAGTACAGGGACAAAACGGAT GATAAAGTAACCGTGGATTCTGCTCACGCGATTCAAAAATATGGAGTAGGCGTAAAATGT GCGACGATTACTCCTAACCAAGATAGAGTTAAAGAATACAATCTCAAACAAGAATGGAAA TCTCCGAACGGAACCATTCGTTCTATTTTAGACGGAACCGTTTTTCGTAAACCGATCATC GTAAAAAATATTCCTCCTGCGGTTCGTTCTTGGAAAAAACCGATTACAGTAGGACGTCAC GCTTACGGAGATCTTTATAAGGACACAGAACTTTATATTCCCGAAGCCGGAAAGGTGGAA CTCGTTTATACCGGAAAGGACGGAAAAGAAAAA…	ATCTCCGTTGCACTCTTTGCAAGCATTACCGCTTGTGGTGCTTTCGGTGGTCTGCCAAGC CTAAAAAGCTCTTTTGTTCTGAGCGAGGACACAATCCCAGGGACAAACGAAACCGTAAAA ACGTTACTTCCCTACGGATCTGTGATCAACTATTACGGATACGTAAAGCCAGGACAAGCG CCGGACGGTTTAGTCGATGGAAACAAAAAAGCATACTATCTCTATGTTTGGATTCCTGCC GTAATCGCTGAAATGGGAGTTCGTATGATTTCCCCAACAGGCGAAATCGGTGAGCCAGGC GACGGAGACTTAGTAAGCGACGCTTTCAAAGCGGCTACCCCAGAAGAAAAATCAATGCCA CATTGGTTTGATACTTGGATCCGTGTAGAAAGA…	GGAAATTGCGCAGCTACAGTTGATGTAGAATATCCGGTATTCCCGAAAGATAAAGAAGGC CGTGCACTTCAGAAATTCCTCGGAACCATTCGTAACGTAGGTTTGGCTGTTGAAGCTCCT AAAAAAAGTCTTTGGGAAGCAATTTTCGGTGAAGGTTCCAGCTTTATCGATCAGATGCCT TCTAAAGTTTTCGAGGCGTTTGACAAAGAATCTTATTACAAACTTACCGACCTGAGTAAA CGTGCAGACGCAATCAACGAAGCAAGTCTTTCTCTTACAGGAATCACTAAAAATAGAGCG AAGATCGGAAATCTGATTGGAGCGGAAGCAATTCTATACATAGGTTACCAAAAACCTTAT ACAGAGTGTAGTACTGAAAATAAAATCGATGCA…	CACGTGGGTAATCTTCCTCTGAGTCTGGGATAACTTTCCGAAAGGGAAGCTAATACTGGA TGGTCCCGAGAGATCATAAGATTTTTCGGGTAAAGATTTATTGCTCGGAGATGAGCCCGC GTCCGATTAGCTAGTTGGTGAGGTAAAGGCTCACCAAGGCGACGATCGGTAGCCGGCCTG AGAGGGTGTTCGGCCACAATGGAACTGAGACACGGTCCATACTCCTACGGGAGGCAGCAG TTAAGAATCTTGCTCAATGGGGGGAACCCTGAAGCAGCGACGCCGCGTGAACGATGAAGG TCTTCGGATTGTAAAGTTCAGTAAGCAGGGAAAAATAAGCAGCAATGTGATGATGGTACC TGCCTAAAGCACCGGCTAACTACGTGCCAGCAG…	ATGCCGATCATTTTTGCTTCGTCTTTGATTTTATTTCCTCAGACGATTATTCAATGGTTA TCTAATAGTAGTCAAGAATGGGCTGGATGGGCAGTGATTATGGATTTTTTTAATCCATTC TCTCAGATTTGGTATCATGCGTTATTTTATTTCGTAATTTATACCGCTTTAATTGTATTC TTTGCTTACTTTTATACAGCGATTCAGTTTAATCCTGCAGAATTGGCTGAGAATTTGAAA AAATACGGTGGGTTCATTCCAGGAATTCGTCCGGGTTCTCACACAAAAGAATACATTGAA AAAGTGTTAAATAGAATCACTCTTCCCGGAGCTATGTTTCTTGCAGGTTTGGCATTAGCA CCTTATATTATTATAAAATTCTTAGATTTGAGC…
45	QSL56	L.interrogans	Malaysia	Human	CTTTCTATTCCTCAGATTTCTACAGGAGATATTTTACGCGAGGCAGTAAAGAATCAAACT GCGATGGGAATAGAAGCAAAACGTTATATGGATGCGGGAGATTTGGTTCCAGATTCCGTA GTGATTGGAATCATAAAAGATCGCATTCGAGAAGCGGATTGTAAAAATGGATTTTTGTTG GATGGATTTCCGAGAACCGTGGAACAAGCGGAAGCTTTAGATACACTTTTAAAAAATGAA GGCAAGTCTATTGATAAAGCGATTAATCTTCAGGTTCCGGATGCGGAACTCTTAAAGAGA TTACTCGGCCGTGCAGAAATAGAAGGTCGCGCGGACGATAACGAAGTGACGATTAAAAAT CGTCTCGATAATTATAATAAGAAGACCTTACCT…	TATCTCGATATAGAACTGGATTATTATGATTTAGGCGTGGAGTACAGGGACAAAACGGAT GATAAAGTAACCGTGGATTCTGCTCACGCGATTCAAAAATATGGAGTAGGCGTAAAATGT GCGACGATTACTCCTAACCAAGATAGAGTTAAAGAATACAATCTCAAACAAGAATGGAAA TCTCCGAACGGAACCATTCGTTCTATTTTAGACGGAACCGTTTTTCGTAAACCGATCATC GTAAAAAATATTCCTCCTGCGGTTCGTTCTTGGAAAAAACCGATTACAGTAGGACGTCAC GCTTACGGAGATCTTTATAAGGACACAGAACTTTATATTCCCGAAGCCGGAAAGGTGGAA CTCGTTTATACCGGAAAGGACGGAAAAGAAAAA…	ATCTCCGTTGCACTCTTTGCAAGCATTACCGCTTGTGGTGCTTTCGGTGGTCTGCCAAGC CTAAAAAGCTCTTTTGTTCTGAGCGAGGACACAATCCCAGGGACAAACGAAACCGTAAAA ACGTTACTTCCCTACGGATCTGTGATCAACTATTACGGATACGTAAAGCCAGGACAAGCG CCGGACGGTTTAGTCGATGGAAACAAAAAAGCATACTATCTCTATGTTTGGATTCCTGCC GTAATCGCTGAAATGGGAGTTCGTATGATTTCCCCAACAGGCGAAATCGGTGAGCCAGGC GACGGAGACTTAGTAAGCGACGCTTTCAAAGCGGCTACCCCAGAAGAAAAATCAATGCCA CATTGGTTTGATACTTGGATCCGTGTAGAAAGA…	GGAAATTGCGCAGCTACAGTTGATGTAGAATATCCGGTATTCCCGAAAGATAAAGAAGGC CGTGCACTTCAGAAATTCCTCGGAACCATTCGTAACGTAGGTTTGGCTGTTGAAGCTCCT AAAAAAAGTCTTTGGGAAGCAATTTTCGGTGAAGGTTCCAGCTTTATCGATCAGATGCCT TCTAAAGTTTTCGAGGCGTTTGACAAAGAATCTTATTACAAACTTACCGACCTGAGTAAA CGTGCAGACGCAATCAACGAAGCAAGTCTTTCTCTTACAGGAATCACTAAAAATAGAGCG AAGATCGGAAATCTGATTGGAGCGGAAGCAATTCTATACATAGGTTACCAAAAACCTTAT ACAGAGTGTAGTACTGAAAATAAAATCGATGCA…	CACGTGGGTAATCTTCCTCTGAGTCTGGGATAACTTTCCGAAAGGGAAGCTAATACTGGA TGGTCCCGAGAGATCATAAGATTTTTCGGGTAAAGATTTATTGCTCGGAGATGAGCCCGC GTCCGATTAGCTAGTTGGTGAGGTAAAGGCTCACCAAGGCGACGATCGGTAGCCGGCCTG AGAGGGTGTTCGGCCACAATGGAACTGAGACACGGTCCATACTCCTACGGGAGGCAGCAG TTAAGAATCTTGCTCAATGGGGGGAACCCTGAAGCAGCGACGCCGCGTGAACGATGAAGG TCTTCGGATTGTAAAGTTCAGTAAGCAGGGAAAAATAAGCAGCAATGTGATGATGGTACC TGCCTAAAGCACCGGCTAACTACGTGCCAGCAG…	ATGCCGATCATTTTTGCTTCGTCTTTGATTTTATTTCCTCAGACGATTATTCAATGGTTA TCTAATAGTAGTCAAGAATGGGCTGGATGGGCAGTGATTATGGATTTTTTTAATCCATTC TCTCAGATTTGGTATCATGCGTTATTTTATTTCGTAATTTATACCGCTTTAATTGTATTC TTTGCTTACTTTTATACAGCGATTCAGTTTAATCCTGCAGAATTGGCTGAGAATTTGAAA AAATACGGTGGGTTCATTCCAGGAATTCGTCCGGGTTCTCACACAAAAGAATACATTGAA AAAGTGTTAAATAGAATCACTCTTCCCGGAGCTATGTTTCTTGCAGGTTTGGCATTAGCA CCTTATATTATTATAAAATTCTTAGATTTGAGC…
46	QSL58	L.interrogans	Korea	Human	CTTTCTATTCCTCAGATTTCTACAGGAGATATTTTACGCGAGGCAGTCAAGAATCAAACT GCGATGGGAATAGAAGCAAAACGTTATATGGATGCGGGAGATTTGGTTCCAGATTCCGTA GTGATTGGAATCATAAAAGATCGCATTCGAGAAGCGGATTGTAAAAATGGATTTTTGTTG GATGGATTTCCGAGAACCGTGGAACAAGCGGAAGCTTTAGATACACTTTTAAAAAATGAA GGCAAGTCTATTGATAAAGCGATTAATCTTCAGGTTCCGGATGCGGAACTCTTAAAGAGA TTACTCGGCCGTGCAGAAATAGAAGGTCGCGCGGACGATAACGAAGTGACGATTAAAAAT CGTCTCGATAATTATAATAAGAAGACCTTACCT…	TATCTCGATATAGAACTGGATTATTATGATTTAGGCGTGGAGTACAGGGACAAAACGGAT GATAAAGTAACCGTGGATTCTGCTCACGCGATTCAAAAATATGGAGTAGGCGTAAAATGT GCGACGATTACTCCTAACCAAGATAGAGTTAAAGAATACAATCTCAAACAAGAATGGAAA TCTCCGAACGGAACCATTCGTTCTATTTTAGACGGAACCGTTTTTCGTAAACCGATCATC GTAAAAAATATTCCTCCTGCGGTTCGTTCTTGGAAAAAACCGATTACAGTAGGACGTCAC GCTTACGGAGATCTTTATAAGGACACAGAACTTTATATTCCCGAAGCCGGAAAGGTGGAA CTCGTTTATACCGGAAAGGACGGAAAAGAAAAA…	ATCTCCGTTGCACTCTTTGCAAGCATTACCGCTTGTGGTGCTTTCGGTGGTCTGCCAAGC CTAAAAAGCTCTTTTGTTCTGAGCGAGGACACAATCCCAGGGACAAACGAAACCGTAAAA ACGTTACTTCCCTACGGATCTGTGATCAACTATTACGGATACGTAAAGCCAGGACAAGCG CCGGACGGTTTAGTCGATGGAAACAAAAAAGCATACTATCTCTATGTTTGGATTCCTGCC GTAATCGCTGAAATGGGAGTTCGTATGATTTCCCCAACAGGCGAAATCGGTGAGCCAGGC GACGGAGACTTAGTAAGCGACGCTTTCAAAGCGGCTACCCCAGAAGAAAAATCAATGCCA CATTGGTTTGATACTTGGATCCGTGTAGAAAGA…	GGAAATTGCGCAGCTACAGTTGATGTAGAATATCCGGTATTCCCGAAAGATAAAGAAGGC CGTGCACTTCAGAAATTCCTCGGAACCATTCGTAACGTAGGTTTGGCTGTTGAAGCTCCT AAAAAAAGTCTTTGGGAAGCAATTTTCGGTGAAGGTTCCAGCTTTATCGATCAGATGCCT TCTAAAGTTTTCGAGGCGTTTGACAAAGAATCTTATTACAAACTTACCGACCTGAGTAAA CGTGCAGACGCAATCAACGAAGCAAGTCTTTCTCTTACAGGAATCACTAAAAATAGAGCG AAGATCGGAAATCTGATTGGAGCGGAAGCAATTCTATACATAGGTTACCAAAAACCTTAT ACAGAGTGTAGTACTGAAAATAAAATCGATGCA…	CACGTGGGTAATCTTCCTCTGAGTCTGGGATAACTTTCCGAAAGGGAAGCTAATACTGGA TGGTCCCGAGAGATCATAAGATTTTTCGGGTAAAGATTTATTGCTCGGAGATGAGCCCGC GTCCGATTAGCTAGTTGGTGAGGTAAAGGCTCACCAAGGCGACGATCGGTAGCCGGCCTG AGAGGGTGTTCGGCCACTATGGAACTGAGACACGGTCCATACTCCTACGGGAGGCAGCAG TTAAGAATCTTGCTCAATGGGGGGAACCCTGAAGCAGCGACGCCGCGTGAACGATGAAGG TCTTCGGATTGTAAAGTTCAGTAAGCAGGGAAAAATAAGCAGCAATGTGATGATGGTACC TGCCTAAAGCACCGGCTAACTACGTGCCAGCAG…	ATGCCGATCATTTTTGCTTCGTCTTTGATTTTATTTCCTCAGACGATTATTCAATGGTTA TCTAATAGTAGTCAAGAATGGGCTGGATGGGCAGTGATTATGGATTTTTTTAATCCATTC TCTCAGATTTGGTACCATGCGTTATTTTATTTCGTAATTTATACTGCTTTTAATTTATTC TTTGCTTACTTTTATACAGCGATTCAGTTTAATCCTGCAGAATTGGCTGAGAATTTGAAA AAATACGGTGGGTTTATTCCAGGAATTCGTCCGGGTTCTCACACAAAAGAATACATTGAA AAAGTGTTAAATAGAATCACTCTTCCCGGAGCGATGTTTCTTGCAGGTTTAGCATTAGCA CCTTATATTATTATAAAATTCTTAGATTTGAGC…
47	QSL65	L.interrogans	Indonesia	Unknown	CTTTCTATTCCTCAGATTTCTACAGGAGATATTTTACGCGAGGCAGTAAAGAATCAAACT GCGATGGGAATAGAAGCAAAACGTTATATGGATGCGGGAGATTTGGTTCCAGATTCCGTA GTGATTGGAATCATAAAAGATCGCATTCGAGAAGCGGATTGTAAAAATGGATTTTTGTTG GATGGATTTCCGAGAACCGTGGAACAAGCGGAAGCTTTAGATACACTTTTAAAAAATGAA GGCAAGTCTATTGATAAAGCGATTAATCTTCAGGTTCCGGATGCGGAACTCTTAAAGAGA TTACTCGGCCGTGCAGAAATAGAAGGTCGCGCGGACGATAACGAAGTGACGATTAAAAAT CGTCTCGATAATTATAATAAGAAGACCTTACCT…	TATCTCGATATAGAACTGGATTATTATGATTTAGGCGTGGAGTACAGGGACAAAACGGAT GATAAAGTAACCGTGGATTCTGCTCACGCGATTCAAAAATATGGAGTAGGCGTAAAATGT GCGACGATTACTCCTAACCAAGATAGAGTTAAAGAATACAATCTCAAACAAGAATGGAAA TCTCCGAACGGAACCATTCGTTCTATTTTAGACGGAACCGTTTTTCGTAAACCGATCATC GTAAAAAATATTCCTCCTGCGGTTCGTTCTTGGAAAAAACCGATTACAGTAGGACGTCAC GCTTACGGAGATCTTTATAAGGACACAGAACTTTATATTCCCGAAGCCGGAAAGGTGGAA CTCGTTTATACCGGAAAGGACGGAAAAGAAAAA…	ATCTCCGTTGCACTCTTTGCAAGCATTACCGCTTGTGGTGCTTTCGGTGGTCTGCCAAGC CTAAAAAGCTCTTTTGTTCTGAGCGAGGACACAATCCCAGGGACAAACGAAACCGTAAAA ACGTTACTTCCCTACGGATCTGTGATCAACTATTACGGATACGTAAAGCCAGGACAAGCG CCGGACGGTTTAGTCGATGGAAACAAAAAAGCATACTATCTCTATGTTTGGATTCCTGCC GTAATCGCTGAAATGGGAGTTCGTATGATTTCCCCAACAGGCGAAATCGGTGAGCCAGGC GACGGAGACTTAGTAAGCGACGCTTTCAAAGCGGCTACCCCAGAAGAAAAATCAATGCCA CATTGGTTTGATACTTGGATCCGTGTAGAAAGA…	GGAAATTGCGCAGCTACAGTTGATGTAGAATATCCGGTATTCCCGAAAGATAAAGAAGGC CGTGCACTTCAGAAATTCCTCGGAACAATTCGTAACGTAGGTTTGGCTGTTGAAGCTCCT AAAAAAAGTCTTTGGGAAGCAATTTTCGGTGAAGGTTCCAGCTTTATCGATCAGATGCCT TCTAAAGTTTTCGAGGCGTTTGACAAAGAATCTTATTACAAACTTACCGACCTGAGTAAA CGTGCAGACGCAATCAACGAAGCAAGTCTTTCTCTTACAGGAATCACTAAAAATAGAGCG AAGATCGGAAATCTGATTGGAGCGGAAGCAATTCTATACATAGGTTACCAAAAACCTTAT ACAGAGTGTAGTACTGAAAATAAAATCGATGCG…	CACGTGGGTAATCTTCCTCTGAGTCTGGGATAACTTTCCGAAAGGGAAGCTAATACTGGA TGGTCCCGAGAGATCACAAGATTTTTCGGGTAAAGATTTATTGCTCGGAGATGAGCCCGC GTCCGATTAGCTAGTTGGTGAGGTAAAGGCTCACCAAGGCGACGATCGGTAGCCGGCCTG AGAGGGTGTTCGGCCACAATGGAACTGAGACACGGTCCATACTCCTACGGGAGGCAGCAG TTAAGAATCTTGCTCAATGGGGGGAACCCTGAAGCAGCGACGCCGCGTGAACGATGAAGG TCTTCGGATTGTAAAGTTCAGTAAGCAGGGAAAAATAAGCAGCAATGTGATGATGGTACC TGCCTAAAGCACCGGCTAACTACGTGCCAGCAG…	ATGCCGATCATTTTTGCTTCGTCTTTGATTTTATTTCCTCAGACGATTATTCAATGGTTA TCTAATAGTAGTCAAGAATGGGCTGGATGGGCAGTGATTATGGATTTTTTTAATCCATTC TCTCAGATTTGGTATCATGCGTTATTTTATTTCGTAATTTATACCGCTTTAATTGTATTC TTTGCTTACTTCTATACAGCGATTCAGTTTAATCCTGCAGAATTGGCTGAGAATTTGAAA AAATACGGTGGATTCATTCCAGGAATTCGTCCGGGTTCTCACACAAAAGAATACATTGAA AAAGTGTTAAATAGAATCACTCTCCCTGGAGCTATGTTTCTTGCAGGTTTGGCATTAGCA CCTTATATTATTATAAAATTCTTAGATTTGAGC…
48	QSL72	L.interrogans	Sri Lanka	Human	CTTTCTATTCCTCAGATTTCTACGGGAGATATTTTACGCGATGCCGTAAAATATCAAACC GCGATGGGAATGGAAGCAAAACGTTATATGGATGCGGGAGATTTAGTTCCCGATTCCGTA GTGATTGGAATTATAAAAGATCGTATTCGAGAAGCGGATTGTAAAAATGGATTTTTATTG GATGGATTTCCGAGAACTGTGGAACAAGCGGAAGCTTTAGATATACTTTTAAAAAATGAA GGCAAGTCCATTGATAAAGCGATCAATCTTCAGGTTCCGGATACAGAACTCTTAAAAAGA CTACTCAGCCGCGCAGAAATTGAAGGTCGCGCGGATGATAACGAAGTGACGATTAAAAAT CGTCTGGATAATTATAACAAGAAGACCTTACCT…	TATCTCGATATAGAACTGGACTATTATGATTTAGGCGTGGAATACAGGGACAAAACGGAC GATAAAGTAACTGTGGATTCCGCTCATGCGATTCAAAAATACGGAGTAGGCGTAAAATGT GCGACGATCACTCCCAACCAAGACAGAGTTAAGGAATACAATCTCAAACAAGAATGGAAA TCTCCAAACGGAACCATTCGTTCCATTTTAGATGGAACCGTTTTTCGTAAACCAATCATT GTAAAAAATATTCCACCTGCGGTTCGTTCTTGGAAAAAACCGATTACGGTTGGACGTCAC GCTTACGGAGACCTTTATAAGGATACCGAACTTTATATTCCCGAAGCGGGAAAGGTGGAG TTGGTTTATACCGGAAAAGATGGAAAAGAAAAA…	ATCTCCGTTGCACTCTTTGCAAGCATTACCGCTTGTGGTGCGTTCGGTGGTCTGCCAAGC CTAAAAAGCTCTTTTGTTCTGAGCGAGGACACAATCCCAGGGACAAACGAAACCGTAAAA ACGTTACTTCCCTACGGATCTGTGATCAACTATTACGGATACGTAAAGCCAGGACAAGCG CCGGACGGTTTAGTCGATGGAAACAAAAAAGCATACTATCTCTATGTTTGGATTCCTGCC GTAATCGCTGAAATGGGAGTTCGTATGATTTCCCCAACAGGCGAAATCGGTGAACCAGGC GATGGAGACTTAGTAAGCGACGCTTTCAAAGCGGCAACCCCAGAAGAAAAATCAATGCCA CATTGGTTTGATACTTGGATCCGTGTAGAAAGA…	GGAAATTGCGCAGCTACAGTCGATGTAGAATATCCGGTATTCCCGAAAGATAAAGAAGGC CGTGCACTTCAAAAATTTCTCGGAACCATTCGTAACGTAGGTTTAGCTGTAGAAGCTCCT AAAAAAAGTCTTTGGGAAGCGATCTTCGGTGAAGGTTCTAGTTTTATCGATCAAATGCCT TCTAAAGTTTTCGAAGCGTTTGACAAAGAGTCTTATTACAAACTTACCGACCTAAGCAAA CGCGCGGACGCAATCAACGAAGCGAGTCTTTCTCTTACAGGAATCACTAAAAACAGAGCG AAGATCGGAAATCTAATCGGAGCGGAAGCAATCCTATACATAGGTTATCAAAAACCTTAT ACAGAGTGTAGTACTGAAAATAAAATCGATGCG…	CACGTGGGTAATCTTCCTCTGAGTCTGGGATAACTTTCCGAAAGGGTAGCTAATACTGGA TAGTCCCGAGAGATCATAAGATTTTTCGGGTAAAGATTCATTGCTCGGAGATGAGCCCGC GTCCGATTAGCTAGTTGGTAAGGTAAAGGCTCACCAAGGCGACGATCGGTAGCCGGCCTG AGAGGGTGTTCGGCCACTATGGAACTGAGACACGGTCCATACTCCTACGGGAGGCAGCAG TTAAGAATCTTGCTCAATGGGGGGAACCCTGAAGCAGCGACGCCGCGTGAACGATGAAGG TCTTCGGATTGTAAAGTTCAGTAAGCAGGGAAAAATAAGCAGCGATGTGATGATGGTACC TGCCTAAAGCACCGGCTAACTACGTGCCAGCAG…	ATGCCGATCATTTTTGCTTCGTCTTTGATTTTATTTCCTCAGACGATTATTCAATGGTTA TCTAATAGTAGTCAAGAATGGGCTGGATGGGCAGTGATTATGGATTTTTTTAATCCATTC TCTCAGATTTGGTATCATGCGTTATTTTATTTCGTAATTTATACCGCTTTAATTGTATTC TTTGCTTACTTCTATACAGCGATTCAGTTTAATCCTGCAGAATTGGCTGAGAATTTGAAA AAATACGGTGGATTCATTCCAGGAATTCGTCCGGGTTCTCACACAAAAGAATACATTGAA AAAGTGTTAAATAGAATCACTCTCCCTGGAGCTATGTTTCTTGCAGGTTTGGCATTAGCA CCTTATATTATTATAAAATTCTTAGATTTGAGC…
49	QSL86	L.interrogans	Malaysia	Human	CTTTCTATTCCTCAGATTTCTACAGGAGATATTTTACGCGAGGCAGTAAAGAATCAAACT GCGATGGGAATAGAAGCAAAACGTTATATGGATGCGGGAGATTTGGTTCCAGATTCCGTA GTGATTGGAATCATAAAAGATCGCATTCGAGAAGCGGATTGTAAAAATGGATTTTTGTTG GATGGATTTCCGAGAACCGTGGAACAAGCGGAAGCTTTAGATACACTTTTAAAAAATGAA GGCAAGTCTATTGATAAAGCGATTAATCTTCAGGTTCCGGATGCGGAACTCTTAAAGAGA TTACTCGGCCGTGCAGAAATAGAAGGTCGCGCGGACGATAACGAAGTGACGATTAAAAAT CGTCTCGATAATTATAATAAGAAGACCTTACCT…	TATCTCGATATAGAACTGGATTATTATGATTTAGGCGTGGAGGACAGGGACAAAACGGAT GATAAAGTAACCGTGGATTCTGCTCACGCGATTCAAAAATATGGAGTAGGCGTAAAATGT GCGACGATTACTCCTAACCAAGATAGAGTTAAAGAATACAATCTCAAACAAGAATGGAAA TCTCCGAACGGAACCATTCGTTCTATTTTAGACGGAACCGTTTTTCGTAAACCGATCATC GTAAAAAATATTCCTCCTGCGGTTCGTTCTTGGAAAAAACCGATTACAGTAGGACGTCAC GCTTACGGAGATCTTTATAAGGACACAGAACTTTATATTCCCGAAGCCGGAAAGGTGGAA CTCGTTTATACCGGAAAGGACGGAAAAGAAAAA…	ATCTCCGTTGCACTCTTTGCAAGCATTACCGCTTGTGGTGCTTTCGGTGGTCTGCCAAGC CTAAAAAGCTCTTTTGTTCTGAGCGAGGACACAATCCCAGGGACAAACGAAACCGTAAAA ACGTTACTTCCCTACGGATCTGTGATCAACTATTACGGATACGTAAAGCCAGGACAAGCG CCGGACGGTTTAGTCGATGGAAACAAAAAAGCATACTATCTCTATGTTTGGATTCCTGCC GTAATCGCTGAAATGGGAGTTCGTATGATTTCCCCAACAGGCGAAATCGGTGAGCCAGGC GACGGAGACTTAGTAAGCGACGCTTTCAAAGCGGCTACCCCAGAAGAAAAATCAATGCCA CATTGGTTTGATACTTGGATCCGTGTAGAAAGA…	GGAAATTGCGCAGCTACAGTCGATGTAGAATATCCGGTATTCCCGAAAGATAAAGAAGGC CGTGCACTTCAGAAATTCCTCGGAACCATTCGTAACGTAGGTTTGGCTGTTGAAGCTCCT AAAAAAAGTCTTTGGGAAGCAATTTTCGGTGAAGGTTCCAGCTTTATCGATCAGATGCCT TCTAAAGTTTTCGAGGCGTTTGACAAAGAATCTTATTACAAACTTACCGACCTGAGTAAA CGTGCAGACGCAATCAACGAAGCAAGTCTTTCTCTTACAGGAATCACTAAAAATAGAGCG AAGATCGGAAATCTGATTGGAGCGGAAGCAATTCTATACATAGGTTACCAAAAACCTTAT ACAGAGTGTAGTACTGAAAATAAAATCGATGCG…	CACGTGGGTAATCTTCCTCTGAGTCTGGGATAACTTTCCGAAAGGGAAGCTAATACTGGA TGGTCCCGAGAGATCATAAGATTTTTCGGGTAAAGATTTATTGCTCGGAGATGAGCCCGC GTCCGATTAGCTAGTTGGTGAGGTAAAGGCTCACCAAGGCGACGATCGGTAGCCGGCCTG AGAGGGTGTTCGGCCACTATGGAACTGAGACACGGTCCATACTCCTACGGGAGGCAGCAG TTAAGAATCTTGCTCAATGGGGGGAACCCTGAAGCAGCGACGCCGCGTGAACGATGAAGG TCTTCGGATTGTAAAGTTCAGTAAGCAGGGAAAAATAAGCAGCAATGTGATGATGGTACC TGCCTAAAGCACCGGCTAACTACGTGCCAGCAG…	ATGCCGATCATTTTTGCTTCGTCTTTGATTTTATTCCCTCAGACGATTATTCAATGGTTA TCTAATAGTAGTCAAGAATGGGCTGGATGGGCAGTGATTATGGATTTTTTTAATCCATTC TCTCAGATTTGGTATCATGCGTTATTTTATTTCGTAATTTATACCGCTTTAATTGTATTC TTTGCTTACTTTTATACAGCGATTCAGTTTAATCCTGCAGAATTGGCTGAGAATTTGAAA AAATACGGTGGGTTCATTCCAGGAATTCGTCCGGGTTCTCACACAAAAGAATACATTGAA AAAGTGTTAAATAGAATCACTCTTCCCGGAGCTATGTTTCTTGCAGGTTTGGCATTAGCA CCTTATATTATTATAAAATTCTTAGATTTGAGC…
50	QSL88	L.interrogans	Malaysia	Human	CTTTCTATTCCTCAGATTTCTACAGGAGATATTTTACGCGAGGCAGTAAAGAATCAAACT GCGATGGGAATAGAAGCAAAACGTTATATGGATGCGGGAGACTTGGTTCCAGATTCCGTA GTGATTGGAATCATAAAAGATCGCATTCGAGAAGCGGATTGTAAAAATGGATTTTTGTTG GATGGATTTCCGAGAACCGTGGAACAAGCGGAAGCTTTAGATACACTTTTAAAAAATGAA GGCAAGTCTATTGATAAAGCGATTAATCTTCAGGTTCCGGATGCGGAACTCTTAAAGAGA TTACTCGGCCGTGCAGAAATAGAAGGTCGCGCGGACGATAACGAAGTGACGATTAAAAAT CGTCTCGATAATTATAATAAGAAGACCTTACCT…	TATCTCGATATAGAACTGGATTATTATGATTTAGGCGTGGAGTACAGGGACAAAACGGAT GATAAAGTAACTGTGGATTCTGCTCACGCGATTCAAAAATATGGAGTAGGCGTAAAATGT GCGACGATTACTCCTAACCAAGATAGAGTTAAAGAATACAATCTCAAACAAGAATGGAAA TCTCCGAACGGAACCATTCGTTCTATTTTAGACGGAACCGTTTTTCGTAAACCGATCATC GTAAAAAATATTCCTCCTGCGGTTCGTTCTTGGAAAAAACCGATTACAGTAGGACGTCAC GCTTACGGAGATCTTTATAAGGACACAGAACTTTATATTCCCGAAGCCGGAAAGGTGGAA CTCGTTTATACCGGAAAGGACGGAAAAGAAAAA…	ATCTCCGTTGCACTCTTTGCAAGCATTACCGCTTGTGGTGCTTTCGGTGGTCTGCCAAGC CTAAAAAGCTCTTTTGTTCTGAGCGAGGACACAATCCCAGGGACAAACGAAACCGTAAAA ACGTTACTTCCCTACGGATCTGTGATCAACTATTACGGATACGTAAAGCCAGGACAAGCG CCGGACGGTTTAGTCGATGGAAACAAAAAAGCATACTATCTCTATGTTTGGATTCCTGCC GTAATCGCTGAAATGGGAGTTCGTATGATTTCCCCAACAGGCGAAATCGGTGAGCCAGGC GACGGAGACTTAGTAAGCGACGCTTTCAAAGCGGCTACCCCAGAAGAAAAATCAATGCCA CATTGGTTTGATACTTGGATCCGTGTAGAAAGA…	GGAAATTGCGCAGCTACAGTCGATGTAGAATATCCGGTTTTCCCGAAAGATAAAGAAGGC CGTGCACTTCAGAAATTCCTCGGAACCATTCGTAACGTAGGTTTGGCTGTTGAAGCTCCT AAAAAAAGTCTTTGGGAAGCAATTTTCGGTGAAGGTTCCAGCTTTATCGATCAGATGCCT TCTAAAGTTTTCGAGGCGTTTGACAAAGAATCTTATTACAAACTTACCGACCTGAGTAAA CGTGCAGACGCAATCAACGAAGCAAGTCTTTCTCTTACAGGAATCACTAAAAATAGAGCG AAGATCGGAAATCTGATTGGAGCGGAAGCAATTCTATACATAGGTTACCAAAAACCTTAT ACAGAGTGTAGTACTGAAAATAAAATCGATGCG…	CACGTGGGTAATCTTCCTCTGAGTCTGGGATAACTTTCCGAAAGGGTAGCTAATACTGGA TGGTCCCGAAAGATCAAACGATGTTTCGGGTAAAGATTTATTGCTCGGAGATGAGCCCGC GTCCGATTAGCTAGTTGGTGAGGAAAAGGCTCACCAAGGCGACGATCGGGAGCCGGCCTG AGAGGGTGTTCGGCCACTATGGAACTGAGACACGGTCCATACTCCTACGGGAGGCAGCAG TTAAGAATCTTGCTCAATGGGGGGAACCCTGAAGCAGCGACGCCGCGTGAACGATGAAGG TCTTCGGATTGTAAAGTTCACTAAGCAGGGAAAAATAAGCAGCGATGTGATGATGGTACC TGCCTAAAGCACCGGCTAACTACGTGCCAGCAG…	ATGCCGATCATTTTTGCTTCGTCTTTGATTTTATTCCCTCAGACGATTATTCAATGGTTA TCTAATAGTAGTCAAGAATGGGCTGGATGGGCAGTGATTATGGATTTTTTTAATCCATTC TCTCAGATTTGGTATCATGCGTTATTTTATTTCGTAATTTATACCGCTTTAATTGTATTC TTTGCTTACTTTTATACAGCGATTCAGTTTAATCCTGCAGAATTGGCTGAGAATTTGAAA AAATACGGTGGATTCATTCCAGGAATTCGTCCGGGTTCTCACACAAAAGAATATATTGAA AAAGTGTTAAATAGAATCACTCTTCCCGGAGCTATGTTTCTTGCAGGTTTGGCATTAGCA CCTTATATTATTATAAAATTCTTAGATTTGAGC…
51	QSL89	L.interrogans	Vietnam	Human	CTTTCTATTCCTCAGATTTCTACAGGAGATATTTTACGCGAGGCAATAAAGAATCAAACT GCGATGGGAATAGAAGCAAAACGTTATATGGATGCGGGAGATTTGGTTCCAGATTCCGTA GTGATTGGAATCATAAAAGATCGCATTCGAGAAGCGGATTGTAAAAATGGATTTTTGTTG GATGGATTTCCGAGAACCGTGGAACAAGCGGAAGCTTTAGATACACTTTTAAAAAATGAA GGCAAGTCTATTGATAAAGCGATTAATCTTCAGGTTCCGGATGCGGAACTCTTAAAGAGA TTACTCGGCCGTGCAGAAATAGAAGGTCGCGCGGACGATAACGAAGTGACGATTAAAAAT CGTCTCGATAATTATAATAAGAAGACCTTACCT…	TATCTCGATATAGAACTGGATTATTATGATTTAGGCGTGGAGTACAGGGACAAAACGGAT GATAAAGTAACTGTGGATTCTGCTCACGCGATTCAAAAATATGGAGTAGGCGTAAAATGT GCGACGATTACTCCTAACCAAGATAGAGTTAAAGAATACAATCTCAAACAAGAATGGAAA TCTCCGAACGGAACCATTCGTTCTATTTTAGACGGAACCGTTTTTCGTAAACCGATCATC GTAAAAAATATTCCTCCTGCGGTTCGTTCTTGGAAAAAACCGATTACAGTAGGACGTCAC GCTTACGGAGATCTTTATAAGGACACAGAACTTTATATTCCCGAAGCCGGAAAGGTGGAA CTCGTTTATACCGGAAAGGACGGAAAAGAAAAA…	ATCTCCGTTGCACTCTTTGCAAGCATTACCGCTTGTGGTGCTTTCGGTGGTCTGCCAAGC CTAAAAAGCTCTTTTGTTCTGAGCGAGGACACAATCCCAGGGACAAACGAAACCGTAAAA ACGTTACTTCCCTACGGATCTGTGATCAACTATTACGGATACGTAAAGCCAGGACAAGCG CCGGACGGTTTAGTCGATGGAAACAAAAAAGCATACTATCTCTATGTTTGGATTCCTGCC GTAATCGCTGAAATGGGAGTTCGTATGATTTCCCCAACAGGCGAAATCGGTGAGCCAGGC GACGGAGACTTAGTAAGCGACGCTTTCAAAGCGGCTACCCCAGAAGAAAAATCAATGCCA CATTGGTTTGATACTTGGATCCGTGTAGAAAGA…	GGAAATTGCGCAGCTACAGTCGATGTAGAATATCCGGTTTTCCCGAAAGATAAAGAAGGC CGTGCCCTTCAGAAATTCCTCGGAACCATTCGTAACGTAGGTTTGGCTGTTGAAGCTCCT AAAAAAAGTCTTTGGGAAGCAATTTTCGGTGAAGGTTCCAGCTTTATCGATCAGATGCCT TCTAAAGTTTTCGAGGCGTTTGACAAAGAATCTTATTACAAACTTACCGACCTGAGTAAA CGTGCAGACGCAATCAACGAAGCAAGTCTTTCTCTTACAGGAATCACTAAAAATAGAGCG AAGATCGGAAATCTGATTGGAGCGGAAGCAATTCTATACATAGGTTACCAAAAACCTTAT ACAGAGTGTAGTACTGAAAATAAAATCGATGCA…	CACGTGGGTAATCTTCCTCTGAGTCTGGGATAACTTTCCGAAAGGGAAGCTAATACTGGA TGGTCCCGAGAGATCACAAGATTTTTCGGGTAAAGATTTATTGCTCGGAGATGAGCCCGC GTCCGATTAGCTAGTTGGTGAGGTAAAGGCTCACCAAGGCGACGATCGGTAGCCGGCCTG AGAGGGTGTTCGGCCACAATGGAACTGAGACACGGTCCATACTCCTACGGGAGGCAGCAG TTAAGAATCTTGCTCAATGGGGGGAACCCTGAAGCAGCGACGCCGCGTGAACGATGAAGG TCTTCGGATTGTAAAGTTCAGTAAGCAGGGAAAAATAAGCAGCAATGTGATGATGGTACC TGCCTAAAGCACCGGCTAACTACGTGCCAGCAG…	ATGCCGATCATTTTTGCTTCGTCTTTGATTTTATTTCCTCAGACGATTATTCAATGGTTA TCTAATAGTAGTCAAGAATGGGCTGGATGGGCAGTGATTATGGATTTTTTTAATCCATTC TCTCAGATTTGGTATCATGCGTTATTTTATTTCGTAATTTATACCGCTTTAATTGTATTC TTTGCTTACTTTTATACAGCGATTCAGTTTAATCCTGCAGAATTGGCTGAGAATTTGAAA AAATACGGTGGGTTCATTCCAGGAATTCGTCCGGGTTCTCACACAAAAGAATACATTGAA AAAGTGTTAAATAGAATCACTCTTCCCGGAGCTATGTTTCTTGCAGGTTTGGCATTAGCA CCTTATATTATTATAAAATTCTTAGATTTGAGC…
52	QSL90	L.interrogans	Brazil	Opossum	CTTTCTATTCCTCAGATTTCTACAGGAGATATTTTACGCGAGGCAATAAAGAATCAAACT GCGATGGGAATAGAAGCAAAACGTTATATGGATGCGGGAGATTTGGTTCCAGATTCCGTA GTGATTGGAATCATAAAAGATCGCATTCGAGAAGCGGATTGTAAAAATGGATTTTTGTTG GATGGATTTCCGAGAACCGTGGAACAAGCGGAAGCTTTAGATACACTTTTAAAAAATGAA GGCAAGTCTATTGATAAAGCGATTAATCTTCAGGTTCCGGATGCGGAACTCTTAAAGAGA TTACTCGGCCGTGCAGAAATAGAAGGTCGCGCGGACGATAACGAAGTGACGATTAAAAAT CGTCTCGATAATTATAATAAGAAGACCTTACCT…	TATCTCGATATAGAACTGGATTATTATGATTTAGGCGTGGAGTACAGGGACAAAACGGAT GATAAAGTAACTGTGGATTCTGCTCACGCGATTCAAAAATATGGAGTAGGCGTAAAATGT GCGACGATTACTCCTAACCAAGATAGAGTTAAAGAATACAATCTCAAACAAGAATGGAAA TCTCCGAACGGAACCATTCGTTCTATTTTAGACGGAACCGTTTTTCGTAAACCGATCATC GTAAAAAATATTCCTCCTGCGGTTCGTTCTTGGAAAAAACCGATTACAGTAGGACGTCAC GCTTACGGAGATCTTTATAAGGACACAGAACTTTATATTCCCGAAGCCGGAAAGGTGGAA CTCGTTTATACCGGAAAGGACGGAAAAGAAAAA…	ATCTCCGTTGCACTCTTTGCAAGCATTACCGCTTGTGGTGCTTTCGGTGGTCTGCCAAGC CTAAAAAGCTCTTTTGTTCTGAGCGAGGACACAATCCCAGGGACAAACGAAACCGTAAAA ACGTTACTTCCCTACGGATCTGTGATCAACTATTACGGATACGTAAAGCCAGGACAAGCG CCGGACGGTTTAGTCGATGGAAACAAAAAAGCATACTATCTCTATGTTTGGATTCCTGCC GTAATCGCTGAAATGGGAGTTCGTATGATTTCCCCAACAGGCGAAATCGGTGAGCCAGGC GACGGAGACTTAGTAAGCGACGCTTTCAAAGCGGCTACCCCAGAAGAAAAATCAATGCCA CATTGGTTTGATACTTGGATCCGTGTAGAAAGA…	GGAAATTGCGCAGCTACAGTCGATGTAGAATATCCGGTTTTCCCGAAAGATAAAGAAGGC CGTGCACTTCAGAAATTCCTCGGAACCATTCGTAACGTAGGTTTGGCTGTTGAAGCTCCT AAAAAAAGTCTTTGGGAAGCAATTTTCGGTGAAGGTTCCAGCTTTATCGATCAGATGCCT TCTAAAGTTTTCGAGGCGTTTGACAAAGAATCTTATTACAAACTTACCGACCTAAGCAAA CGTGCAGACGCAATCAACGAAGCAAGTCTTTCTCTTACAGGAATCACTAAAAATAGAGCG AAGATCGGAAATCTGATTGGAGCGGAAGCAATTCTATACATAGGTTACCAAAAACCTTAT ACAGAGTGTAGTACTGAAAATAAAATCGATGCG…	CACGTGGGTAATCTTCCTCTGAGTCTGGGATAACTTTCCGAAAGGGAAGCTAATACTGGA TGGTCCCGAGAGATCACAAGATTTTTCGGGTAAAGATTTATTGCTCGGAGATGAGCCCGC GTCCGATTAGCTAGTTGGTGAGGTAAAGGCTCACCAAGGCGACGATCGGTAGCCGGCCTG AGAGGGTGTTCGGCCACAATGGAACTGAGACACGGTCCATACTCCTACGGGAGGCAGCAG TTAAGAATCTTGCTCAATGGGGGGAACCCTGAAGCAGCGACGCCGCGTGAACGATGAAGG TCTTCGGATTGTAAAGTTCAGTAAGCAGGGAAAAATAAGCAGCAATGTGATGATGGTACC TGCCTAAAGCACCGGCTAACTACGTGCCAGCAG…	ATGCCGATCATTTTTGCTTCGTCTTTGATTTTATTCCCTCAGACGATTATTCAATGGTTA TCTAATAGTAGTCAAGAATGGGCTGGATGGGCAGTGATTATGGATTTTTTTAATCCATTC TCTCAGATTTGGTATCATGCGTTATTTTATTTCGTAATTTATACCGCTTTAATTGTATTC TTTGCTTACTTCTATACAGCGATTCAGTTTAATCCTGCAGAATTGGCTGAGAATTTGAAA AAATACGGTGGATTCATTCCAGGAATTCGTCCGGGTTCTCACACAAAAGAATACATTGAA AAAGTGTTAAATAGAATCACTCTCCCTGGAGCTATGTTTCTTGCAGGTTTGGCATTAGCA CCTTATATTATTATAAAATTCTTAGATTTGAGC…
53	QSL94	L.interrogans	Indonesia	Human	CTTTCTATTCCTCAGATTTCTACAGGAGATATTTTACGCGAGGCAGTAAAGAATCAAACT GCGATGGGAATAGAAGCAAAACGTTATATGGATGCGGGAGATTTGGTTCCAGATTCCGTA GTGATTGGAATCATAAAAGATCGCATTCGAGAAGCGGATTGTAAAAATGGATTTTTGTTG GATGGATTTCCGAGAACCGTGGAACAAGCGGAAGCTTTAGATACACTTTTAAAAAATGAA GGCAAGTCTATTGATAAAGCGATTAATCTTCAGGTTCCGGATGCGGAACTCTTAAAGAGA TTACTCGGCCGTGCAGAAATAGAAGGTCGCGCGGACGATAACGAAGTGACGATTAAAAAT CGTCTCGATAATTATAATAAGAAGACCTTACCT…	TATCTCGATATAGAACTGGATTATTATGATTTAGGCGTGGAGTACAGGGACAAAACGGAT GATAAAGTAACTGTGGATTCTGCTCACGCGATTCAAAAATATGGAGTAGGCGTAAAATGT GCGACGATTACTCCTAACCAAGATAGAGTTAAAGAATACAATCTCAAACAAGAATGGAAA TCTCCGAACGGAACCATTCGTTCTATTTTAGACGGAACCGTTTTTCGTAAACCGATCATC GTAAAAAATATTCCTCCTGCGGTTCGTTCTTGGAAAAAACCGATTACAGTAGGACGTCAC GCTTACGGAGATCTTTATAAGGACACAGAACTTTATATTCCCGAAGCCGGAAAGGTGGAA CTCGTTTATACCGGAAAGGACGGAAAAGAAAAA…	ATCTCCGTTGCACTCTTTGCAAGCATTACCGCTTGTGGTGCTTTCGGTGGTCTGCCAAGC CTAAAAAGCTCTTTTGTTCTGAGCGAGGACACAATCCCAGGGACAAACGAAACCGTAAAA ACGTTACTTCCCTACGGATCTGTGATCAACTATTACGGATACGTAAAGCCAGGACAAGCG CCGGACGGTTTAGTCGATGGAAACAAAAAAGCATACTATCTCTATGTTTGGATTCCTGCC GTAATCGCTGAAATGGGAGTTCGTATGATTTCCCCAACAGGCGAAATCGGTGAGCCAGGC GACGGAGACTTAGTAAGCGACGCTTTCAAAGCGGCTACCCCAGAAGAAAAATCAATGCCA CATTGGTTTGATACTTGGATCCGTGTAGAAAGA…	GGAAATTGCGCAGCTACAGTCGATGTAGAATATCCGGTTTTCCCGAAAGATAAAGAAGGC CGTGCACTTCAGAAATTCCTCGGAACCATTCGTAACGTAGGTTTGGCTGTTGAAGCTCCT AAAAAAAGTCTTTGGGAAGCAATTTTCGGTGAAGGTTCCAGCTTTATCGATCAGATGCCT TCTAAAGTTTTCGAGGCGTTTGACAAAGAATCTTATTACAAACTTACCGACCTGAGTAAA CGTGCAGACGCAATCAACGAAGCAAGTCTTTCTCTTACAGGAATCACTAAAAATAGAGCG AAGATCGGAAATCTGATTGGAGCGGAAGCAATTCTATACATAGGTTACCAAAAACCTTAT ACAGAGTGTAGTACTGAAAATAAAATCGATGCG…	CACGTGGGTAATCTTCCTCTGAGTCTGGGATAACTTTCCGAAAGGGAAGCTAATACTGGA TGGTCCCGAGAGATCATAAGATTTTTCGGGTAAAGATTTATTGCTCGGAGATGAGCCCGC GTCCGATTAGCTAGTTGGTGAGGTAAAGGCTCACCAAGGCGACGATCGGTAGCCGGCCTG AGAGGGTGTTCGGCCACTATGGAACTGAGACACGGTCCATACTCCTACGGGAGGCAGCAG TTAAGAATCTTGCTCAATGGGGGGAACCCTGAAGCAGCGACGCCGCGTGAACGATGAAGG TCTTCGGATTGTAAAGTTCAGTAAGCAGGGAAAAATAAGCAGCAATGTGATGATGGTACC TGCCTAAAGCACCGGCTAACTACGTGCCAGCAG…	ATGCCGATCATTTTTGCTTCGTCTTTGATTTTATTCCCTCAGACGATTATTCAATGGTTA TCTAATAGTAGTCAAGAATGGGCTGGATGGGCAGTGATTATGGATTTTTTTAATCCATTC TCTCAGATTTGGTATCATGCGTTATTTTATTTCGTAATTTATACCGCTTTAATTGTATTC TTTGCTTACTTTTATACAGCGATTCAGTTTAATCCTGCAGAATTGGCTGAGAATTTGAAA AAATACGGTGGGTTCATTCCAGGAATTCGTCCGGGTTCTCACACAAAAGAATACATTGAA AAAGTGTTAAATAGAATCACTCTTCCCGGAGCTATGTTTCTTGCAGGTTTGGCATTAGCA CCTTATATTATTATAAAATTCTTAGATTTGAGC…
54	QSL95	L.interrogans	Australia	Human	CTTTCTATTCCTCAGATTTCTACAGGAGATATTTTACGCGAGGCAGTAAAGAATCAAACT GCGATGGGAATAGAAGCAAAACGTTATATGGATGCGGGAGACTTGGTTCCAGATTCCGTA GTGATTGGAATCATAAAAGATCGCATTCGAGAAGCGGATTGTAAAAATGGATTTTTGTTG GATGGATTTCCGAGAACCGTGGAACAAGCGGAAGCTTTAGATACACTTTTAAAAAATGAA GGCAAGTCTATTGATAAAGCGATTAATCTTCAGGTTCCGGATGCGGAACTCTTAAAGAGA TTACTCGGCCGTGCAGAAATAGAAGGTCGCGCGGACGATAACGAAGTGACGATTAAAAAT CGTCTCGATAATTATAATAAGAAGACCTTACCT…	TATCTCGATATAGAACTGGATTATTATGATTTAGGCGTGGAGTACAGGGACAAAACGGAT GATAAAGTAACTGTGGATTCTGCTCACGCGATTCAAAAATATGGAGTAGGCGTAAAATGT GCGACGATTACTCCTAACCAAGATAGAGTTAAAGAATACAATCTCAAACAAGAATGGAAA TCTCCGAACGGAACCATTCGTTCTATTTTAGACGGAACCGTTTTTCGTAAACCGATCATC GTAAAAAATATTCCTCCTGCGGTTCGTTCTTGGAAAAAACCGATTACAGTAGGACGTCAC GCTTACGGAGATCTTTATAAGGACACAGAACTTTATATTCCCGAAGCCGGAAAGGTGGAA CTCGTTTATACCGGAAAGGACGGAAAAGAAAAA…	ATCTCCGTTGCACTCTTTGCAAGCATTACCGCTTGTGGTGCTTTCGGTGGTCTGCCAAGC CTAAAAAGCTCTTTTGTTCTGAGCGAGGACACAATCCCAGGGACAAACGAAACCGTAAAA ACGTTACTTCCCTACGGATCTGTGATCAACTATTACGGATACGTAAAGCCAGGACAAGCG CCGGACGGTTTAGTCGATGGAAACAAAAAAGCATACTATCTCTATGTTTGGATTCCTGCC GTAATCGCTGAAATGGGAGTTCGTATGATTTCCCCAACAGGCGAAATCGGTGAGCCAGGC GACGGAGACTTAGTAAGCGACGCTTTCAAAGCGGCTACCCCAGAAGAAAAATCAATGCCA CATTGGTTTGATACTTGGATCCGTGTAGAAAGA…	GGAAATTGCGCAGCTACAGTCGATGTAGAATATCCGGTTTTCCCGAAAGATAAAGAAGGC CGTGCCCTTCAGAAATTCCTCGGAACCATTCGTAACGTAGGTTTGGCTGTTGAAGCTCCT AAAAAAAGTCTTTGGGAAGCAATTTTCGGTGAAGGTTCCAGCTTTATCGATCAGATGCCT TCTAAAGTTTTCGAGGCGTTTGACAAAGAATCTTATTACAAACTTACCGACCTGAGTAAA CGTGCAGACGCAATCAACGAAGCAAGTCTTTCTCTTACAGGAATCACTAAAAATAGAGCG AAGATCGGAAATCTGATTGGAGCGGAAGCAATTCTATACATAGGTTACCAAAAACCTTAT ACAGAGTGTAGTACTGAAAATAAAATCGATGCA…	CACGTGGGTAATCTTCCTCTGAGTCTGGGATAACTTTCCGAAAGGGAAGCTAATACTGGA TGGTCCCGAGAGATCATAAGATTTTTCGGGTAAAGATTTATTGCTCGGAGATGAGCCCGC GTCCGATTAGCTAGTTGGTGAGGTAAAGGCTCACCAAGGCGACGATCGGTAGCCGGCCTG AGAGGGTGTTCGGCCACTATGGAACTGAGACACGGTCCATACTCCTACGGGAGGCAGCAG TTAAGAATCTTGCTCAATGGGGGGAACCCTGAAGCAGCGACGCCGCGTGAACGATGAAGG TCTTCGGATTGTAAAGTTCAGTAAGCAGGGAAAAATAAGCAGCAATGTGATGATGGTACC TGCCTAAAGCACCGGCTAACTACGTGCCAGCAG…	ATGCCGATCATTTTTGCTTCGTCTTTGATTTTATTCCCTCAGACGATTATTCAATGGTTA TCTAATAGTAGTCAAGAATGGGCTGGATGGGCAGTGATTATGGATTTTTTTAATCCATTC TCTCAGATTTGGTATCATGCGTTATTTTATTTCGTAATTTATACCGCTTTAATTGTATTC TTTGCTTACTTTTATACAGCGATTCAGTTTAATCCTGCAGAATTGGCTGAGAATTTGAAA AAATACGGTGGGTTCATTCCAGGAATTCGTCCGGGTTCTCACACAAAAGAATACATTGAA AAAGTGTTAAATAGAATCACTCTTCCCGGAGCTATGTTTCTTGCAGGTTTGGCATTAGCA CCTTATATTATTATAAAATTCTTAGATTTGAGC…
55	QSL96	L.interrogans	Australia	Human	CTTTCTATTCCTCAGATTTCTACAGGAGATATTTTACGCGAGGCAGTAAAGAATCAAACT GCGATGGGAATAGAAGCAAAACGTTATATGGATGCGGGAGATTTGGTTCCAGATTCCGTA GTGATTGGAATCATAAAAGATCGCATTCGAGAAGCGGATTGTAAAAATGGATTTTTGTTG GATGGATTTCCGAGAACCGTGGAACAAGCGGAAGCTTTAGATACACTTTTAAAAAATGAA GGCAAGTCTATTGATAAAGCGATTAATCTCTAGGTTCCGGATGCGGAACTCTTAAAGAGA TTACTCGGCCGTGCAGAAATAGAAGGTCGCGCGGACGATAACGAAGTGACGATTAAAAAT CGTCTCGATAATTATAATAAGAAGACCTTACCT…	TATCTCGATATAGAACTGGATTATTATGATTTAGGCGTGGAGTACAGGGACAAAACGGAT GATAAAGTAACTGTTGATTCTGCTCACGCGATTCAAAAATATGGAGTAGGCGTAAAATGT GCGACGATTACTCCTAACCAAGATAGAGTTAAAGAATACAATCTCAAACAAGAATGGAAA TCTCCGAACGGAACCATTCGTTCTATTTTAGACGGAACCGTTTTTCGTAAACCGATCATC GTAAAAAATATTCCTCCTGCGGTTCGTTCTTGGAAAAAACCGATTACAGTAGGACGTCAC GCTTACGGAGATCTTTATAAGGACACAGAACTTTATATTCCCGAAGCCGGAAAGGTGGAA CTCGTTTATACCGGAAAGGACGGAAAAGAAAAA…	ATCTCCGTTGCACTCTTTGCAAGCATTACCGCTTGTGGTGCTTTCGGTGGTCTGCCAAGC CTAAAAAGCTCTTTTGTTCTGAGCGAGGACACAATCCCAGGGACAAACGAAACCGTAAAA ACGTTACTTCCCTACGGATCTGTGATCAACTATTACGGATACGTAAAGCCAGGACAAGCG CCGGACGGTTTAGTCGATGGAAACAAAAAAGCATACTATCTCTATGTTTGGATTCCTGCC GTAATCGCTGAAATGGGAGTTCGTATGATTTCCCCAACAGGCGAAATCGGTGAGCCAGGC GACGGAGACTTAGTAAGCGACGCTTTCAAAGCGGCTACCCCAGAAGAAAAATCAATGCCA CATTGGTTTGATACTTGGATCCGTGTAGAAAGA…	GGAAATTGCGCAGCTACAGTCGATGTAGAATATCCGGTTTTCCCGAAAGATAAAGAAGGC CGTGCACTTCAGAAATTCCTCGGAACCATTCGTAACGTAGGTTTGGCTGTTGAAGCTCCT AAAAAAAGTCTTTGGGAAGCAATTTTCGGTGAAGGTTCCAGCTTTATCGATCAGATGCCT TCTAAAGTTTTCGAGGCGTTTGACAAAGAATCTTATTACAAACTTACCGACCTGAGTAAA CGTGCAGACGCAATCAACGAAGCAAGTCTTTCTCTTACAGGAATCACTAAAAATAGAGCG AAGATCGGAAATCTGATTGGAGCGGAAGCAATTCTATACATAGGTTACCAAAAACCTTAT ACAGAGTGTAGTACTGAAAATAAAATCGATGCG…	CACGTGGGTAATCTTCCTCTGAGTCTGGGATAACTTTCCGAAAGGGAAGCTAATACTGGA TGGTCCCGAGAGATCATAAGATTTTTCGGGTAAAGATTTATTGCTCGGAGATGAGCCCGC GTCCGATTAGCTAGTTGGTGAGGTAAAGGCTCACCAAGGCGACGATCGGTAGCCGGCCTG AGAGGGTGTTCGGCCACAATGGAACTGAGACACGGTCCATACTCCTACGGGAGGCAGCAG TTAAGAATCTTGCTCAATGGGGGGAACCCTGAAGCAGCGACGCCGCGTGAACGATGAAGG TCTTCGGATTGTAAAGTTCAGTAAGCAGGGAAAAATAAGCAGCAATGTGATGATGGTACC TGCCTAAAGCACCGGCTAACTACGTGCCAGCAG…	ATGCCGATCATTTTTGCTTCGTCTTTGATTTTATTCCCTCAGACGATTATTCAATGGTTA TCTAATAGTAGTCAAGAATGGGCTGGATGGGCAGTGATTATGGATTTTTTTAATCCATTC TCTCAGATTTGGTATCATGCGTTATTTTATTTCGTAATTTATACCGCTTTAATTGTATTC TTTGCTTACTTTTATACAGCGATTCAGTTTAATCCTGCAGAATTGGCTGAGAATTTGAAA AAATACGGTGGGTTCATTCCAGGAATTCGTCCGGGTTCTCACACAAAAGAATACATTGAA AAAGTGTTAAATAGAATCACTCTTCCCGGAGCTATGTTTCTTGCAGGTTTGGCATTAGCA CCTTATATTATTATAAAATTCTTAGATTTGAGC…
56	QSL105	L.interrogans	Sri Lanka	Human	CTTTCTATTCCTCAGATTTCTACGGGAGATATTTTACGCGAGGCAGTAAAGAATCAAACT GCGATGGGAATAGAAGCAAAACGTTATATGGATGCGGGAGATTTGGTTCCAGATTCCGTA GTGATTGGAATCATAAAAGATCGCATTCGAGAAGCGGATTGTAAAAATGGATTTTTGTTG GATGGATTTCCGAGAACCGTGGAACAAGCGGAAGCTTTAGATACACTTTTAAAAAATGAA GGCAAGTCTATTGATAAAGCGATTAATCTTCAGGTTCCGGATGCGGAACTCTTAAAGAGA TTACTCGGCCGTGCAGAAATAGAAGGTCGCGCGGACGATAACGAAGTGACGATTAAAAAT CGTCTCGATAATTATAATAAGAAGACCTTACCT…	TATCTCGATATAGAACTGGATTATTATGATTTAGGCGTGGAGTACAGAGACAAAACGGAT GATAAAGTAACTGTGGATTCTGCTCACGCGATTCAAAAATATGGAGTAGGCGTAAAATGT GCGACGATTACTCCTAACCAAGATAGAGTTAAAGAATACAATCTCAAACAAGAATGGAAA TCTCCGAACGGAACCATTCGTTCTATTTTAGACGGAACCGTTTTTCGTAAACCGATCATC GTAAAAAATATTCCTCCTGCGGTTCGTTCTTGGAAAAAACCGATTACAGTAGGACGTCAC GCTTACGGAGATCTTTATAAGGACACAGAACTTTATATTCCCGAAGCCGGAAAGGTGGAA CTCGTTTATACCGGAAAGGACGGAAAAGAAAAA…	ATCTCCGTTGCACTCTTTGCAAGCATTACCGCTTGTGGTGCTTTCGGTGGTCTGCCAAGC CTAAAAAGCTCTTTTGTTCTGAGCGAGGACACAATCCCAGGGACAAACGAAACCGTAAAA ACGTTACTTCCCTACGGATCTGTGATCAACTATTACGGATACGTAAAGCCAGGACAAGCG CCGGACGGTTTAGTCGATGGAAACAAAAAAGCATACTATCTCTATGTTTGGATTCCTGCC GTAATCGCTGAAATGGGAGTTCGTATGATTTCCCCAACAGGCGAAATCGGTGAGCCAGGC GACGGAGACTTAGTAAGCGACGCTTTCAAAGCGGCTACCCCAGAAGAAAAATCAATGCCA CATTGGTTTGATACTTGGATCCGTGTAGAAAGA…	GGAAATTGCGCAGCTACAGTCGATGTAGAATATCCGGTATTCCCGAAAGATAAAGAAGGC CGTGCACTTCAGAAATTCCTCGGAACCATTCGTAACGTAGGTTTGGCTGTTGAAGCTCCT AAAAAAAGTCTTTGGGAAGCAATTTTCGGTGAAGGTTCCAGCTTTATCGATCAGATGCCT TCTAAAGTTTTCGAGGCGTTTGACAAAGAATCTTATTACAAACTTACCGACCTGAGTAAA CGTGCAGACGCAATCAACGAAGCAAGTCTTTCTCTTACAGGAATCACTAAAAATAGAGCG AAGATCGGAAATCTGATTGGAGCGGAAGCAATTCTATACATAGGTTACCAAAAACCTTAT ACAGAGTGTAGTACTGAAAATAAAATCGATGCG…	CACGTGGGTAATCTTCCTCTGAGTCTGGGATAACTTTCCGAAAGGGGAGCTAATACTGGA TGGTCCCGAGAGATCATAAGATTTTTCGGGTAAAGATTTATTGCTCGGAGATGAGCCCGC GTCCGATTAGCTAGTTGGTGAGGTAAAGGCTCACCAAGGCGACGATCGGTAGCCGGCCTG AGAGGGTGTTCGGCCACAATGGAACTGAGACACGGTCCATACTCCTACGGGAGGCAGCAG TTAAGAATCTTGCTCAATGGGGGGAACCCTGAAGCAGCGACGCCGCGTGAACGATGAAGG TCTTCGGATTGTAAAGTTCAGTAAGCAGGGAAAAATAAGCAGCGATGTGATGATGGTACC TGCCTAAAGCACCGGCTAACTACGTGCCAGCAG…	ATGCCGATCATTTTTGCTTCGTCCTTGATTTTATTTCCTCAGACGATTATTCAATGGTTA TCTAATAGTAGTCAAGAATGGGCTGGATGGGCAGTGATTATGGATTTTTTTAATCCATTC TCTCAGATTTGGTATCATGCGTTATTTTATTTCGTAATTTATACCGCTTTAATTGTATTC TTTGCTTACTTTTATACAGCGATTCAGTTTAATCCTGCAGAATTGGCTGAGAATTTGAAA AAATACGGTGGATTCATTCCAGGAATTCGTCCGGGTTCTCACACAAAAGAATATATTGAA AAAGTGTTAAATAGAATCACTCTTCCCGGAGCTATGTTTCTTGCAGGTTTGGCATTAGCA CCTTATATTATTATAAAATTCTTAGATTTGAGC…
57	QSL107	L.interrogans	Malaysia	Human	CTTTCTATTCCTCAGATTTCTACAGGAGATATTTTACGCGAGGCAGTAAAGAATCAAACT GCGATGGGAATAGAAGCAAAACGTTATATGGATGCGGGAGATTTGGTTCCAGATTCCGTT GTGATTGGAATCATAAAAGATCGCATTCGAGAAGCGGATTGTAAAAATGGATTTTTGTTG GATGGATTTCCGAGAACCGTGGAACAAGCGGAAGCTTTAGATACACTTTTAAAAAATGAA GGCAAGTCTATTGATAAAGCGATTAATCTTCAGGTTCCGGATGCGGAACTCTTAAAGAGA TTACTCGGCCGTGCAGAAATAGAAGGTCGCGCGGACGATAACGAAGTGACGATTAAAAAT CGTCTCGATATTTATAATAAGAAGACCTTACCT…	TATCTCGATATAGAACTGGATTATTATGATTTAGGCGTGGAGTACAGGGACAAAACGGAT GATAAAGTAACCGTGGATTCTGCTCACGCGATTCAAAAATATGGAGTAGGCGTAAAATGT GCGACGATTACTCCTAACCAAGATAGAGTTAAAGAATACAATCTCAAACAAGAATGGAAA TCTCCGAACGGAACCATTCGTTCTATTTTAGACGGAACCGTTTTTCGTAAACCGATCATC GTAAAAAATATTCCTCCTGCGGTTCGTTCTTGGAAAAAACCGATTACAGTAGGACGTCAC GCTTACGGAGATCTTTATAAGGACACAGAACTTTATATTCCCGAAGCCGGAAAGGTGGAA CTCGTTTATACCGGAAAGGACGGAAAAGAAAAA…	ATCTCCGTTGCACTCTTTGCAAGCATTACCGCTTGTGGTGCTTTCGGTGGTCTGCCAAGC CTAAAAAGCTCTTTTGTTCTGAGCGAGGACACAATCCCAGGGACAAACGAAACCGTAAAA ACGTTACTTCCCTACGGATCTGTGATCAACTATTACGGATACGTAAAGCCAGGACAAGCG CCGGACGGTTTAGTCGATGGAAACAAAAAAGCATACTATCTCTATGTTTGGATTCCTGCC GTAATCGCTGAAATGGGAGTTCGTATGATTTCCCCAACAGGCGAAATCGGTGAGCCAGGC GACGGAGACTTAGTAAGCGACGCTTTCAAAGCGGCTACCCCAGAAGAAAAATCAATGCCA CATTGGTTTGATACTTGGATCCGTGTAGAAAGA…	GGAAATTGCGCAGCTACAGTCGATGTAGAATATCCGGTATTCCCGAAAGATAAAGAAGGC CGTGCACTTCAGAAATTCCTCGGAACCATTCGTAACGTAGGTTTGGCTGTTGAAGCTCCT AAAAAAAGTCTTTGGGAAGCAATTTTCGGTGAAGGTTCCAGCTTTATCGATCAGATGCCT TCTAAAGTTTTCGAGGCGTTTGACAAAGAATCTTATTACAAACTTACCGACCTGAGTAAA CGTGCAGACGCAATCAACGAAGCAAGTCTTTCTCTTACAGGAATCACTAAAAATAGAGCG AAGATCGGAAATCTGATTGGAGCGGAAGCAATTCTATACATAGGTTACCAAAAACCTTAT ACAGAGTGTAGTACTGAAAATAAAATCGATGCG…	CACGTGGGTAATCTTCCTCTGAGTCTGGGATAACTTTCCGAAAGGGGAGCTAATACTGGA TGGTCCCGAGAGATCATAAGATTTTTCGGGTAAAGATTTATTGCTCGGAGATGAGCCCGC GTCCGATTAGCTAGTTGGTGAGGTAAAGGCTCACCAAGGCGACGATCGGTAGCCGGCCTG AGAGGGTGTTCGGCCACAATGGAACTGAGACACGGTCCATACTCCTACGGGAGGCAGCAG TTAAGAATCTTGCTCAATGGGGGGAACCCTGAAGCAGCGACGCCGCGTGAACGATGAAGG TCTTCGGATTGTAAAGTTCAGTAAGCAGGGAAAAATAAGCAGCAATGTGATGATGGTACC TGCCTAAAGCACCGGCTAACTACGTGCCAGCAG…	ATGCCGATCATTTTTGCTTCGTCCTTGATTTTATTTCCTCAGACGATTATTCAATGGTTA TCTAATAGTAGTCAAGAATGGGCTGGATGGGCAGTGATTATGGATTTTTTTAATCCATTC TCTCAGATTTGGTATCATGCGTTATTTTATTTCGTAATTTATACCGCTTTAATTGTATTC TTTGCTTACTTTTATACAGCGATTCAGTTTAATCCTGCAGAATTGGCTGAGAATTTGAAA AAATACGGTGGATTCATTCCAGGAATTCGTCCGGGTTCTCACACAAAAGAATATATTGAA AAAGTGTTAAATAGAATCACTCTTCCCGGAGCTATGTTTCTTGCAGGTTTGGCATTAGCA CCTTATATTATTATAAAATTCTTAGATTTGAGC…
58	QSL109	L.interrogans	Malaysia	Human	CTTTCTATTCCTCAGATTTCTACAGGAGATATTTTACGCGAGGCAGTAAAGAATCAAACT GCGATGGGAATAGAAGCAAAACGTTATATGGATGCGGGAGACTTGGTTCCAGACTCCGTA GTGATTGGAATCATAAAAGATCGCATTCGAGAAGCGGATTGTAAAAATGGATTTTTGTTG GATGGATTTCCGAGAACCGTGGAACAAGCGGAAGCTTTAGATACACTTTTAAAAAATGAA GGCAAGTCTATTGATAAAGCGATTAATCTTCAGGTTCCGGATGCGGAACTCTTAAAGAGA TTACTCGGCCGTGCAGAAATAGAAGGTCGCGCGGACGATACCGAAGAGACGATTAAAAAT CGTCTCGATAATTATAATAAGAAGACCTTACCT…	TATCTCGATATAGAACTGGATTATTATGATTTAGGCGTGGAGTACAGGGACAAAACGGAT GATAAAGTAACCGTGGATTCTGCTCACGCGATTCAAAAATATGGAGTAGGCGTAAAATGT GCGACGATTACTCCTAACCAAGATAGAGTTAAAGAATACAATCTCAAACAAGAATGGAAA TCTCCGAACGGAACCATTCGTTCTATTTTAGACGGAACCGTTTTTCGTAAACCGATCATC GTAAAAAATATTCCTCCTGCGGTTCGTTCTTGGAAAAAACCGATTACAGTAGGACGTCAC GCTTACGGAGATCTTTATAAGGACACAGAACTTTATATTCCCGAAGCCGGAAAGGTGGAA CTCGTTTATACCGGAAAGGACGGAAAAGAAAAA…	ATCTCCGTTGCACTCTTTGCAAGCATTACCGCTTGTGGTGCTTTCGGTGGTCTGCCAAGC CTAAAAAGCTCTTTTGTTCTGAGCGAGGACACAATCCCAGGGACAAACGAAACCGTAAAA ACGTTACTTCCCTACGGATCTGTGATCAACTATTACGGATACGTAAAGCCAGGACAAGCG CCGGACGGTTTAGTCGATGGAAACAAAAAAGCATACTATCTCTATGTTTGGATTCCTGCC GTAATCGCTGAAATGGGAGTTCGTATGATTTCCCCAACAGGCGAAATCGGTGAGCCAGGC GACGGAGACTTAGTAAGCGACGCTTTCAAAGCGGCTACCCCAGAAGAAAAATCAATGCCA CATTGGTTTGATACTTGGATCCGTGTAGAAAGA…	GGAAATTGCGCAGCTACAGTCGATGTAGAATATCCGGTATTCCCGAAAGATAAAGAAGGC CGTGCACTTCAGAAATTCCTCGGAACCATTCGTAACGTAGGTTTGGCTGTTGAAGCTCCT AAAAAAAGTCTTTGGGAAGCAATTTTCGGTGAAGGTTCCAGCTTTATCGATCAGATGCCT TCTAAAGTTTTCGAGGCGTTTGACAAAGAATCTTATTACAAACTTACCGACCTGAGTAAA CGTGCAGACGCAATCAACGAAGCAAGTCTTTCTCTTACAGGAATCACTAAAAATAGAGCG AAGATCGGAAATCTGATTGGAGCGGAAGCAATTCTATACATAGGTTACCAAAAACCTTAT ACAGAGTGTAGTACTGAAAATAAAATCGATGCG…	CACGTGGGTAATCTTCCTCTGAGTCTGGGATAACTTTCCGAAAGGGTAGCTAATACTGGA TGGTCCCGAGAGATCATAAGATTTTTCGGGTAAAGATTTATTGCTCGGAGATGAGCCCGC GTCCGATTAGCTAGTTGGTGAGGTAAAGGCTCACCAAGGCGACGATCGGTAGCCGGCCTG AGAGGGTGTTCGGCCACAATGGAACTGAGACACGGTCCATACTCCTACGGGAGGCAGCAG TTAAGAATCTTGCTCAATGGGGGGAACCCTGAAGCAGCGACGCCGCGTGAACGATGAAGG TCTTCGGATTGTAAAGTTCAGTAAGCAGGGAAAAATAAGCAGCAATGTGATGATGGTACC TGCCTAAAGCACCGGCTAACTACGTGCCAGCAG…	ATGCCGATCATTTTTGCTTCGTCCTTGATTTTATTTCCTCAGACGATTATTCAATGGTTA TCTAATAGTAGTCAAGAATGGGCTGGATGGGCAGTGATTATGGATTTTTTTAATCCATTC TCTCAGATTTGGTATCATGCGTTATTTTATTTCGTAATTTATACCGCTTTAATTGTATTC TTTGCTTACTTTTATACAGCGATTCAGTTTAATCCTGCAGAATTGGCTGAGAATTTGAAA AAATACGGTGGATTCATTCCAGGAATTCGTCCGGGTTCTCACACAAAAGAATATATTGAA AAAGTGTTAAATAGAATCACTCTTCCCGGAGCTATGTTTCTTGCAGGTTTGGCATTAGCA CCTTATATTATTATAAAATTCTTAGATTTGAGC…
59	QSL110	L.interrogans	Denmark	Necked field mouse	CTTTCTATTCCTCAGATTTCTACAGGAGATATTTTACGCGAGGCAGTAAAGAATCAAACT GCGATGGGAATAGAAGCAAAACGTTATATGGATGCGGGAGATTTGGTTCCAGATTCCGTA GTGATTGGAATCATAAAAGATCGCATTCGAGAAGCGGATTGTAAAAATGGATTTTTGTTG GATGGATTTCCGAGAACCGTGGAACAAGCGGAAGCTTTAGATACACTTTTAAAAAATGAA GGCAAGTCTATTGATAAAGCGATTAATCTTCAGGTTCCGGATGCGGAACTCTTAAAGAGA TTACTCGGCCGTGCAGAAATAGAAGGTCGCGCGGACGATAACGAAGTGACGATTAAAAAT CGTCTCGATAATTATAATAAGAAGACCTTACCT…	TATCTCGATATAGAACTGGATTATTATGATTTAGGCGTGGAGTACAGAGACAAAACGGAT GATAAAGTAACTGTGGATTCTGCTCACGCGATTCAAAAATATGGAGTAGGCGTAAAATGT GCGACGATTACTCCTAACCAAGATAGAGTTAAAGAATACAATCTCAAACAAGAATGGAAA TCTCCGAACGGAACCATTCGTTCTATTTTAGACGGAACCGTTTTTCGTAAACCGATCATC GTAAAAAATATTCCTCCTGCGGTTCGTTCTTGGAAAAAACCGATTACAGTAGGACGTCAC GCTTACGGAGATCTTTATAAGGACACAGAACTTTATATTCCCGAAGCCGGAAAGGTGGAA CTCGTTTATACCGGAAAGGACGGAAAAGAAAAA…	ATCTCCGTTGCACTCTTTGCAAGCATTACCGCTTGTGGTGCTTTCGGTGGTTTGCCAAGC CTTAAAAGCTCTTTTGTTCTGAGCGAGAGCACAGTTCCAGGAACAAACGAAACCGTAAAA ACGTTCCTTCCCTATGGATCTGTGATCAACTATTACGGATATGTAAAGCCAGGACAAGCG CCGGACGGTTTAGTCAACGGAAACAAAAAAGCATACTATCTCTATGTTTGGATCCCAGCT GTAATCGCTGAAATGGGAGTTCGTATGATTTCCCCAACAGGCGAAATCGGGGAACCAGGC GACGGAGACTTAGTAAGCGACGCTTTCAAAGCGGCAACCCCGGAAGAAAAATCAATGCCA CATTGGTTTGATACCTGGATCCGTGTAGAAAGA…	GGAAATTGCGCAGCTACAGTCGATGTAGAATATCCGGTATTCCCGAAAGATAAAGAAGGC CGTGCACTTCAGAAATTCCTCGGAACAATTCGTAACGTAGGTTTGGCAGTCGAACCTCCG AAGAAAAGTCTTTGGGAAGCGATCTTCGGAGAAGGTTCCAGTTTTATCGATCAAATGCCT TCTAAAGTTTTCGAGGCATTCGATAAGGAATCTTATTACAAACTTACCGACCTCAGTAAA CGCGCCGATATTCTTAACGAAGCGACTCTTTCTCTCACAGGAATTACGAAAAGCAGAGCG AAGATCGGAAACCTGATCGGAGCCGAAGCGATTCTTTACATAGGTTATCAAAAACCCTAT ACAGAGTGTAGTACTGAAAATAAAATCGATGCG…	CACGTGGGTAATCTTCCTCCGAGTCTGGGATAACTTTCCGAAAGGGGAGCTAATACTGGA TAGTCCCGATAGATCATAGGATGTATCGGGTAAAGATTTATTGCTCGGAGATGAGCCCGC GTCCGATTAGCTAGTTGGTGAGGTAAAGGCTCACCAAGGCGACGATCGGTAGCCGGCCTG AGAGGGTGTTCGGCCACAATGGAACTGAGACACGGTCCATACTCCTACGGGAGGCAGCAG TTAAGAATCTTGCTCAATGGGGGGAACCCTGAAGCAGCGACGCCGCGTGAACGATGAAGG TCTTCGGATTGTAAAGTTCAATAAGCAGGGAAAAATAAGCAGCGATGTGATGATGGTACC TGCCTAAAGCACCGGCTAACTACGTGCCAGCAG…	ATGCCGATCATTTTTGCTTCTTCCTTGATTTTATTCCCACAGACGATCATTCAGTGGTTG TCTTCCAGTAGCGAACAATGGGCGGGTTGGGCGATCATTATGGACTTTTTCAATCCATTC TCCCAGATCTGGTATCATGCATTGTTCTACTATATAATCTATACTTCTTTGATCGTGTTC TTCGCATACTTTTATACTGCGATTCAGTTCAACCCTGCAGAGTTGGCGGAAAACCTGAAA AAATACGGCGGATTCATTCCAGGAATTCGTCCCGGTTCTCATACGAAAGAATACATCGAA AAAGTGTTAAACAGAATCACTCTCCCCGGTGCGATGTTCCTCGCGGGATTGGCCCTGGCT CCTTACATCATCATCAAATTCTTAGATTTGAGT…
60	QSL112	L.interrogans	Indonesia	Human	CTTTCTATTCCTCAGATTTCTACAGGAGATATTTTACGCGAGGCAGTAAAGAATCAAACT GCGATGGGAATAGAAGCAAAACGTTATATGGATGCGGGAGATTTGGTTCCAGATTCCGTC GTGATTGGAATCATAAAAGATCGCATTCGAGAAGCGGATTGTAAAAATGGATTTTTGTTG GATGGATTTCCGAGAACCGTGGAACAAGCGGAAGCTTTAGATACACTTTTAAAAAATGAA GGCAAGTCTATTGATAAAGCGATTAATCTTCAGGTTCCGGATGCGGAACTCTTAAAGAGA TTACTCGGCCGTGCAGAAATAGAAGGTCGCGCGGACGATACCGAAGTGACGATTAAAAAT CGTCTCGATAATTATAATAAGAAGACCTTACCT…	TATCTCGATATAGAACTGGATTATTATGATTTAGGCGTGGAGTACAGGGACAAAACGGAT GATAAAGTAACCGTGGATTCTGCTCACGCGATTCAAAAATATGGAGTAGGCGTAAAATGT GCGACGATTACTCCTAACCAAGATAGAGTTAAAGAATACAATCTCAAACAAGAATGGAAA TCTCCGAACGGAACCATTCGTTCTATTTTAGACGGAACCGTTTTTCGTAAACCGATCATC GTAAAAAATATTCCTCCTGCGGTTCGTTCTTGGAAAAAACCGATTACAGTAGGACGTCAC GCTTACGGAGATCTTTATAAGGACACAGAACTTTATATTCCCGAAGCCGGAAAGGTGGAA CTCGTTTATACCGGAAAGGACGGAAAAGAAAAA…	ATCTCCGTTGCACTCTTTGCAAGCATTACCGCTTGTGGTGCTTTCGGTGGTCTGCCAAGC CTAAAAAGCTCTTTTGTTCTGAGCGAGGACACAATCCCAGGGACAAACGAAACCGTAAAA ACGTTACTTCCCTACGGATCTGTGATCAACTATTACGGATACGTAAAGCCAGGACAAGCG CCGGACGGTTTAGTCGATGGAAACAAAAAAGCATACTATCTCTATGTTTGGATTCCTGCC GTAATCGCTGAAATGGGAGTTCGTATGATTTCCCCAACAGGCGAAATCGGTGAGCCAGGC GACGGAGACTTAGTAAGCGACGCTTTCAAAGCGGCTACCCCAGAAGAAAAATCAATGCCA CATTGGTTTGATACTTGGATCCGTGTAGAAAGA…	GGAAATTGCGCAGCTACAGTCGATGTAGAATATCCGGTATTCCCGAAAGATAAAGAAGGC CGTGCACTTCAGAAATTCCTCGGAACAATTCGTAACGTAGGTTTGGCGGTCGAACCTCCG AAGAAAAGTCTTTGGGAAGCGATCTTCGGAGAAGGTTCCAGTTTTATCGATCAAATGCCT TCTAAAGTTTTCGAAGCATTCGATAAGGAATCCTATTACAAACTTACCGACCTTAGCAAA CGCGCAGATATTCTTAACGAAGCGACTCTTTCCCTTACGGGAATCACTAAGTCCAGAGCG AAGATCGGAAACCTGATCGGAGCGGAAGCGATTCTTTACATCGGATATCAAAAACCTTAT ACCGAGTGCGGTACTGAAAACAAAATCGACGCG…	CACGTGGGTAATCTTCCTCTGAGTCTGGGATAACTTTCCGAAAGGGGAGCTAATACTGGA TGGTCCCGAGAGATCATAAGATTTTTCGGGTAAAGATTTATTGCTCGGAGATGAGCCCGC GTCCGATTAGCTAGTTGGTGAGGTAAAGGCTCACCAAGGCGACGATCGGTAGCCGGCCTG AGAGGGTGTTCGGCCACAATGGAACTGAGACACGGTCCATACTCCTACGGGAGGCAGCAG TTAAGAATCTTGCTCAATGGGGGGAACCCTGAAGCAGCGACGCCGCGTGAACGATGAAGG TCTTCGGATTGTAAAGTTCAGTAAGCAGGGAAAAATAAGCAGCAATGTGATGATGGTACC TGCCTAAAGCACCGGCTAACTACGTGCCAGCAG…	ATGCCGATCATTTTTGCTTCGTCTTTGATTTTATTTCCTCAGACGATTATTCAATGGTTA TCTAATAGTAGTCAAGAATGGGCTGGATGGGCAGTGATTATGGATTTTTTTAATCCATTC TCTCAGATTTGGTATCATGCGTTATTTTATTTCGTAATTTATACCGCTTTAATTGTATTC TTTGCTTACTTTTATACAGCGATTCAGTTTAATCCTGCAGAATTGGCTGAGAATTTGAAA AAATACGGTGGGTTCATTCCAGGAATTCGTCCGGGTTCTCACACAAAAGAATACATTGAA AAAGTGTTAAATAGAATCACTCTTCCCGGAGCTATGTTTCTTGCAGGTTTGGCATTAGCA CCTTATATTATTATAAAATTCTTAGATTTGAGC…
61	R5	L.interrogans	Brazil	Canis familiaris (dog)	CTTTCTATTCCTCAGATTTCTACAGGAGATATTTTACGCGAGGCAGTAAAGAATCAAACT GCGATGGGAATAGAAGCAAAACGTTATATGGATGCGGGAGATTTGGTTCCAGATTCCGTA GTGATTGGAATCATAAAAGATCGCATTCGAGAAGCGGATTGTAAAAATGGATTTTTGTTG GATGGATTTCCGAGAACCGTGGAACAAGCGGAAGCTTTAGATACACTTTTAAAAAATGAA GGCAAGTCTATTGATAAAGCGATTAATCTTCAGGTTCCGGATGCGGAACTCTTAAAGAGA TTACTCGGCCGTGCAGAAATAGAAGGTCGCGCGGACGATAACGAAGTGACGATTAAAAAT CGTCTCGATAATTATAATAAGAAGACCTTACCT…	TATCTCGATATAGAACTGGATTATTATGATTTAGGCGTGGAGTACAGGGACAAAACGGAT GATAAAGTAACTGTGGATTCTGCTCACGCGATTCAAAAATATGGAGTAGGCGTAAAATGT GCGACGATTACTCCTAACCAAGATAGAGTTAAAGAATACAATCTCAAACAAGAATGGAAA TCTCCGAACGGAACCATTCGTTCTATTTTAGACGGAACCGTTTTTCGTAAACCGATCATC GTAAAAAATATTCCTCCTGCGGTTCGTTCTTGGAAAAAACCGATTACAGTAGGACGTCAC GCTTACGGAGATCTTTATAAGGACACAGAACTTTATATTCCCGAAGCCGGAAAGGTGGAA CTCGTTTATACCGGAAAGGACGGAAAAGAAAAA…	ATCTCCGTTGCACTCTTTGCAAGCATTACCGCTTGTGGTGCTTTCGGTGGTCTGCCAAGC CTAAAAAGCTCTTTTGTTCTGAGCGAGGACACAATCCCAGGGACAAACGAAACCGTAAAA ACGTTACTTCCCTACGGATCTGTGATCAACTATTACGGATACGTAAAGCCAGGACAAGCG CCGGACGGTTTAGTCGATGGAAACAAAAAAGCATACTATCTCTATGTTTGGATTCCTGCC GTAATCGCTGAAATGGGAGTTCGTATGATTTCCCCAACAGGCGAAATCGGTGAACCAGGC GACGGAGACTTAGTAAGCGACGCTTTCAAAGCGGCTACCCCAGAAGAAAAATCAATGCCA CATTGGTTTGATACTTGGATCCGTGTAGAAAGA…	GGAAATTGCGCAGCTACAGTCGATGTAGAATATCCGGTATTCCCGAAAGATAAAGAAGGC CGTGCACTTCAGAAATTCCTCGGAACCATTCGTAACGTAGGTTTGGCCGTTGAAGCTCCT AAAAAAAGTCTTTGGGAAGCAATTTTCGGTGAAGGTTCCAGCTTTATCGATCAGATGCCT TCTAAAGTTTTCGAGGCGTTTGACAAAGAATCTTATTACAAACTTACCGACCTAAGCAAA CGTGCAGACGCAATCAACGAAGCAAGTCTTTCTCTTACAGGAATCACTAAAAATAGAGCG AAGATCGGAAATCTGATTGGAGCGGAAGCAATTCTATACATAGGTTACCAAAAACCTTAT ACAGAGTGTAGTACTGAAAATAAAATCGATGCG…	CACGTGGGTAATCTTCCTCTGAGTCTGGGATAACTTTCCGAAAGGGAAGCTAATACTGGA TAGTCCCGAGAGATCATAAGATTTTTCGGGTAAAGATTCATTGCTCGGAGATGAGCCCGC GTCCGATTAGCTAGTTGGTGAGGTAAAGGCTCACCAAGGCGACGATCGGTAGCCGGCCTG AGAGGGTGTTCGGCCACAATGGAACTGAGACACGGTCCATACTCCTACGGGAGGCAGCAG TTAAGAATCTTGCTCAATGGGGGGAACCCTGAAGCAGCGACGCCGCGTGAACGATGAAGG TCTTCGGATTGTAAAGTTCAGTAAGCAGGGAAAAATAAGCAGCAATGTGATGATGGTACC TGCCTAAAGCACCGGCTAACTACGTGCCAGCAG…	ATGCCGATCATTTTTGCTTCGTCTTTGATTTTATTTCCTCAGACGATTATTCAATGGTTA TCTAATAGTAGTCAAGAATGGGCTGGATGGGCAGTGATTATGGATTTTTTTAATCCATTC TCTCAGATTTGGTATCATGCGTTATTTTATTTCGTAATTTATACCGCTTTAATTGTATTC TTTGCTTACTTTTATACAGCGATTCAGTTTAATCCTGCAGAATTGGCTGAGAATTTGAAA AAATACGGTGGGTTCATTCCAGGAATTCGTCCGGGTTCTCACACAAAAGAATACATTGAA AAAGTGTTAAATAGAATCACTCTTCCCGGAGCTATGTTTCTTGCAGGTTTGGCATTAGCA CCTTATATTATTATAAAATTCTTAGATTTGAGC…
62	R7	L.interrogans	Brazil	Rattus norvegicus (rat)	CTTTCTATTCCTCAGATTTCTACAGGAGATATTTTACGCGAGGCAGTAAAGAATCAAACT GCGATGGGAATAGAAGCAAAACGTTATATGGATGCGGGAGACTTGGTTCCAGATTCCGTA GTGATTGGAATCATAAAAGATCGCATTCGAGAAGCGGATTGTAAAAATGGATTTTTGTTG GATGGATTTCCGAGAACCGTGGAACAAGCGGAAGCTTTAGATACACTTTTAAAAAATGAA GGCAAGTCTATTGATAAAGCGATTAATCTTCAGGTTCCGGATGCGGAACTCTTAAAGAGA TTACTCGGCCGTGCAGAAATAGAAGGTCGCGCGGACGATAACGAAGTGACGATTAAAAAT CGTCTCGATAATTATAATAAGAAGACCTTACCT…	TATCTCGATATAGAACTGGATTATTATGATTTAGGCGTGGAGTACAGGGACAAAACGGAT GATAAAGTAACTGTGGATTCTGCTCACGCGATTCAAAAATATGGAGTAGGCGTAAAATGT GCGACGATTACTCCTAACCAAGATAGAGTTAAAGAATACAATCTCAAACAAGAATGGAAA TCTCCGAACGGAACCATTCGTTCTATTTTAGACGGAACCGTTTTTCGTAAACCGATCATC GTAAAAAATATTCCTCCTGCGGTTCGTTCTTGGAAAAAACCGATTACAGTAGGACGTCAC GCTTACGGAGATCTTTATAAGGACACAGAACTTTATATTCCCGAAGCCGGAAAGGTGGAA CTCGTTTATACCGGAAAGGACGGAAAAGAAAAA…	ATCTCCGTTGCACTCTTTGCAAGCATTACCGCTTGTGGTGCTTTCGGTGGTCTGCCAAGC CTAAAAAGCTCTTTTGTTCTGAGCGAGGACACAATCCCAGGGACAAACGAAACCGTAAAA ACGTTACTTCCCTACGGATCTGTGATCAACTATTACGGATACGTAAAGCCAGGACAAGCG CCGGACGGTTTAGTCGATGGAAACAAAAAAGCATACTATCTCTATGTTTGGATTCCTGCC GTAATCGCTGAAATGGGAGTTCGTATGATTTCCCCAACAGGCGAAATCGGTGAGCCAGGC GACGGAGACTTAGTAAGCGACGCTTTCAAAGCGGCTACCCCAGAAGAAAAATCAATGCCA CATTGGTTTGATACTTGGATCCGTGTAGAAAGA…	GGAAATTGCGCAGCTACAGTCGATGTAGAATATCCGGTATTCCCGAAAGATAAAGAAGGC CGTGCACTTCAGAAATTCCTCGGAACCATTCGTAACGTAGGTTTGGCTGTTGAAGCTCCT AAAAAAAGTCTTTGGGAAGCAATTTTCGGTGAAGGTTCCAGCTTTATCGATCAGATGCCT TCTAAAGTTTTCGAGGCGTTTGACAAAGAATCTTATTACAAACTTACCGACCTGAGTAAA CGTGCAGACGCAATCAACGAAGCAAGTCTTTCTCTTACAGGAATCACTAAAAATAGAGCG AAGATCGGAAATCTGATTGGAGCGGAAGCAATTCTATACATAGGTTACCAAAAACCTTAT ACAGAGTGTAGTACTGAAAATAAAATCGATGCA…	CACGTGGGTAATCTTCCTCTGAGTCTGGGATAACTTTCCGAAAGGGAAGCTAATACTGGA TGGTCCCGAGAGATCATAAGATTTTTCGGGTAAAGATTTATTGCTCGGAGATGAGCCCGC GTCCGATTAGCTAGTTGGTGAGGTAAAGGCTCACCAAGGCGACGATCGGTAGCCGGCCTG AGAGGGTGTTCGGCCACAATGGAACTGAGACACGGTCCATACTCCTACGGGAGGCAGCAG TTAAGAATCTTGCTCAATGGGGGGAACCCTGAAGCAGCGACGCCGCGTGAACGATGAAGG TCTTCGGATTGTAAAGTTCAGTAAGCAGGGAAAAATAAGCAGCAATGTGATGATGGTACC TGCCTAAAGCACCGGCTAACTACGTGCCAGCAG…	ATGCCGATCATTTTTGCTTCGTCTTTGATTTTATTTCCTCAGACGATTATTCAATGGTTA TCTAATAGTAGTCAAGAATGGGCTGGATGGGCAGTGATTATGGATTTTTTTAATCCATTC TCTCAGATTTGGTATCATGCGTTATTTTATTTCGTAATTTATACCGCTTTAATTGTATTC TTTGCTTACTTTTATACAGCGATTCAGTTTAATCCTGCAGAATTGGCTGAGAATTTGAAA AAATACGGTGGGTTCATTCCAGGAATTCGTCCGGGTTCTCACACAAAAGAATACATTGAA AAAGTGTTAAATAGAATCACTCTTCCCGGAGCTATGTTTCTTGCAGGTTTGGCATTAGCA CCTTATATTATTATAAAATTCTTAGATTTGAGC…
63	R8	L.interrogans	Brazil	Canis familiaris (dog)	CTTTCTATTCCTCAGATTTCTACAGGAGATATTTTACGCGAGGCAGTAAAGAATCAAACT GCGATGGGAATAGAAGCAAAACGTTATATGGATGCGGGAGATTTGGTTCCAGATTCCGTA GTGATTGGAATCATAAAAGATCGCATTCGAGAAGCGGATTGTAAAAATGGATTTTTGTTG GATGGATTTCCGAGAACCGTGGAACAAGCGGAAGCTTTAGATACACTTTTAAAAAATGAA GGCAAGTCTATTGATAAAGCGATTAATCTTCAGGTTCCGGATGCGGAACTCTTAAAGAGA TTACTCGGCCGTGCAGAAATAGAAGGTCGCGCGGACGATAACGAAGTGACGATTAAAAAT CGTCTCGATAATTATAATAAGAAGACCTTACCT…	TATCTCGATATAGAACTGGATTATTATGATTTAGGCGTGGAGTACAGGGACAAAACGGAT GATAAAGTAACTGTGGATTCTGCTCACGCGATTCAAAAATATGGAGTAGGCGTAAAATGT GCGACGATTACTCCTAACCAAGATAGAGTTAAAGAATACAATCTCAAACAAGAATGGAAA TCTCCGAACGGAACCATTCGTTCTATTTTAGACGGAACCGTTTTTCGTAAACCGATCATC GTAAAAAATATTCCTCCTGCGGTTCGTTCTTGGAAAAAACCGATTACAGTAGGACGTCAC GCTTACGGAGATCTTTATAAGGACACAGAACTTTATATTCCCGAAGCCGGAAAGGTGGAA CTCGTTTATACCGGAAAGGACGGAAAAGAAAAA…	ATCTCCGTTGCACTCTTTGCAAGCATTACCGCTTGTGGTGCTTTCGGTGGTCTGCCAAGC CTAAAAAGCTCTTTTGTTCTGAGCGAGGACACAATCCCAGGGACAAACGAAACCGTAAAA ACGTTACTTCCCTACGGATCTGTGATCAACTATTACGGATACGTAAAGCCAGGACAAGCG CCGGACGGTTTAGTCGATGGAAACAAAAAAGCATACTATCTCTATGTTTGGATTCCTGCC GTAATCGCTGAAATGGGAGTTCGTATGATTTCCCCAACAGGCGAAATCGGTGAACCAGGC GACGGAGACTTAGTAAGCGACGCTTTCAAAGCGGCTACCCCAGAAGAAAAATCAATGCCA CATTGGTTTGATACTTGGATCCGTGTAGAAAGA…	GGAAATTGCGCAGCTACAGTCGATGTAGAATATCCGGTATTCCCGAAAGATAAAGAAGGC CGTGCACTTCAGAAATTCCTCGGAACCATTCGTAACGTAGGTTTGGCCGTTGAAGCTCCT AAAAAAAGTCTTTGGGAAGCAATTTTCGGTGAAGGTTCCAGCTTTATCGATCAGATGCCT TCTAAAGTTTTCGAGGCGTTTGACAAAGAATCTTATTACAAACTTACCGACCTAAGCAAA CGTGCAGACGCAATCAACGAAGCAAGTCTTTCTCTTACAGGAATCACTAAAAATAGAGCG AAGATCGGAAATCTGATTGGAGCGGAAGCAATTCTATACATAGGTTACCAAAAACCTTAT ACAGAGTGTAGTACTGAAAATAAAATCGATGCG…	CACGTGGGTAATCTTCCTCCGAGTCTGGGATAACTTTCCGAAAGGGGAGCTAATACTGGA TAGTCCCGATAGATCATAGGATGTATCGGGTAAAGATTCATTGCTCGGAGATGAGCCCGC GTCCGATTAGCTAGTTGGTGAGGTAAAGGCTCACCAAGGCGACGATCGGTAGCCGGCCTG AGAGGGTGTTCGGCCACAATGGAACTGAGACACGGTCCATACTCCTACGGGAGGCAGCAG TTAAGAATCTTGCTCAATGGGGGGAACCCTGAAGCAGCGACGCCGCGTGAACGATGAAGG TCTTCGGATTGTAAAGTTCAATAAGCAGGGAAAAATAAGCAGCGATGTGATGATGGTACC TGCCTAAAGCACCGGCTAACTACGTGCCAGCAG…	ATGCCGATCATTTTTGCTTCGTCTTTGATTTTATTTCCTCAGACGATTATTCAATGGTTA TCTAATAGTAGTCAAGAATGGGCTGGATGGGCAGTGATTATGGATTTTTTTAATCCATTC TCTCAGATTTGGTATCATGCGTTATTTTATTTCGTAATTTATACCGCTTTAATTGTATTC TTTGCTTACTTCTATACAGCGATTCAGTTTAATCCTGCAGAATTGGCTGAGAATTTGAAA AAATACGGTGGATTCATTCCAGGAATTCGTCCGGGTTCTCACACAAAAGAATACATTGAA AAAGTGTTAAATAGAATCACTCTCCCTGGAGCTATGTTTCTTGCAGGTTTGGCATTAGCA CCTTATATTATTATAAAATTCTTAGATTTGAGC…
64	R9	L.interrogans	Brazil	Canis familiaris (dog)	CTTTCTATTCCTCAGATTTCTACAGGAGATATTTTACGCGAGGCAGTAAAGAATCAAACT GCGATGGGAATAGAAGCAAAACGTTATATGGATGCGGGAGATTTGGTTCCAGATTCCGTA GTGATTGGAATCATAAAAGATCGCATTCGAGAAGCGGATTGTAAAAATGGATTTTTGTTG GATGGATTTCCGAGAACCGTGGAACAAGCGGAAGCTTTAGATACACTTTTAAAAAATGAA GGCAAGTCTATTGATAAAGCGATTAATCTTCAGGTTCCGGATGCGGAACTCTTAAAGAGA TTACTCGGCCGTGCAGAAATAGAAGGTCGCGCGGACGATAACGAAGTGACGATTAAAAAT CGTCTCGATAATTATAATAAGAAGACCTTACCT…	TATCTCGATATAGAACTGGATTATTATGATTTAGGCGTGGAGTACAGGGACAAAACGGAT GATAAAGTAACTGTGGATTCTGCTCACGCGATTCAAAAATATGGAGTAGGCGTAAAATGT GCGACGATTACTCCTAACCAAGATAGAGTTAAAGAATACAATCTCAAACAAGAATGGAAA TCTCCGAACGGAACCATTCGTTCTATTTTAGACGGAACCGTTTTTCGTAAACCGATCATC GTAAAAAATATTCCTCCTGCGGTTCGTTCTTGGAAAAAACCGATTACAGTAGGACGTCAC GCTTACGGAGATCTTTATAAGGACACAGAACTTTATATTCCCGAAGCCGGAAAGGTGGAA CTCGTTTATACCGGAAAGGACGGAAAAGAAAAA…	ATCTCCGTTGCACTCTTTGCAAGCATTACCGCTTGTGGTGCTTTCGGTGGTCTGCCAAGC CTAAAAAGCTCTTTTGTTCTGAGCGAGGACACAATCCCAGGGACAAACGAAACCGTAAAA ACGTTACTTCCCTACGGATCTGTGATCAACTATTACGGATACGTAAAGCCAGGACAAGCG CCGGACGGTTTAGTCGATGGAAACAAAAAAGCATACTATCTCTATGTTTGGATTCCTGCC GTAATCGCTGAAATGGGAGTTCGTATGATTTCCCCAACAGGCGAAATCGGTGAACCAGGC GACGGAGACTTAGTAAGCGACGCTTTCAAAGCGGCTACCCCAGAAGAAAAATCAATGCCA CATTGGTTTGATACTTGGATCCGTGTAGAAAGA…	GGAAATTGCGCAGCTACAGTCGATGTAGAATATCCGGTATTCCCGAAAGATAAAGAAGGC CGTGCACTTCAGAAATTCCTCGGAACCATTCGTAACGTAGGTTTGGCCGTTGAAGCTCCT AAAAAAAGTCTTTGGGAAGCAATTTTCGGTGAAGGTTCCAGCTTTATCGATCAGATGCCT TCTAAAGTTTTCGAGGCGTTTGACAAAGAATCTTATTACAAACTTACCGACCTAAGCAAA CGTGCAGACGCAATCAACGAAGCAAGTCTTTCTCTTACAGGAATCACTAAAAATAGAGCG AAGATCGGAAATCTGATTGGAGCGGAAGCAATTCTATACATAGGTTACCAAAAACCTTAT ACAGAGTGTAGTACTGAAAATAAAATCGATGCG…	CACGTGGGTAATCTTCCTCTGAGTCTGGGATAACTTTCCGAAAGGGAAGCTAATACTGGA TAGTCCCGAGAGATCATAGGATTTATCGGGTAAAGATTCATTGCTCGGAGATGAGCCCGC GTCCGATTAGCTAGTTGGTGAGGTAAAGGCTCACCAAGGCGACGATCGGTAGCCGGCCTG AGAGGGTGTTCGGCCACAATGGAACTGAGACACGGTCCATACTCCTACGGGAGGCAGCAG TTAAGAATCTTGCTCAATGGGGGGAACCCTGAAGCAGCGACGCCGCGTGAACGATGAAGG TCTTCGGATTGTAAAGTTCAATAAGCAGGGAAAAATAAGCAGCAATGTGATGATGGTACC TGCCTAAAGCACCGGCTAACTACGTGCCAGCAG…	ATGCCGATCATTTTTGCTTCGTCTTGGATTTTATTCCCTCAGACGATTATTCAATGGTTA TCTAATAGTAGTCAAGAATGGGCTGGATGGGCAGTGATTATGGATTTTTTTAATCCATTC TCTCAGATTTGGTATCATGCGTTATTTTATTTCGTAATTTATACCGCTTTAATTGTATTC TTTGCTTACTTCTATACAGCGATTCAGTTTAATCCTGCAGAATTGGCTGAGAATTTGAAA AAATACGGTGGATTCATTCCAGGAATTCGTCCGGGTTCTCACACAAAAGAATACACTGAA AAAGTGTTAAATAGAATCACTCTCCCTGGAGCTATGTTTCTTGCAGGTTTGGCATTAGCA CCTTATATTATTATAAAATTCTTAGATTTGAGC…
65	R10	L.interrogans	Brazil	Sus scrofa (swine)	CTTTCTATTCCTCAGATTTCTACAGGAGATATTTTACGCGAGGCAGTAAAGAATCAAACT GCGATGGGAATAGAAGCAAAACGTTATATGGATGCGGGAGATTTGGTTCCAGATTCCGTA GTGATTGGAATCATAAAAGATCGCATTCGAGAAGCGGATTGTAAAAATGGATTTTTGTTG GATGGATTTCCGAGAACCGTGGAACAAGCGGAAGCTTTAGATACACTTTTAAAAAATGAA GGCAAGTCTATTGATAAAGCGATTAATCTTCAGGTTCCGGATGCGGAACTCTTAAAGAGA TTACTCGGCCGTGCAGAAATAGAAGGTCGCGCGGACGATAACGAAGTGACGATTAAAAAT CGTCTCGATAATTATAATAAGAAGACCTTACCT…	TATCTCGATATAGAACTGGATTATTATGATTTAGGCGTGGAGTACAGGGACAAAACGGAT GATAAAGTAACTGTGGATTCTGCTCACGCGATTCAAAAATATGGAGTAGGCGTAAAATGT GCGACGATTACTCCTAACCAAGATAGAGTTAAAGAATACAATCTCAAACAAGAATGGAAA TCTCCGAACGGAACCATTCGTTCTATTTTAGACGGAACCGTTTTTCGTAAACCGATCATC GTAAAAAATATTCCTCCTGCGGTTCGTTCTTGGAAAAAACCGATTACAGTAGGACGTCAC GCTTACGGAGATCTTTATAAGGACACAGAACTTTATATTCCCGAAGCCGGAAAGGTGGAA CTCGTTTATACCGGAAAGGACGGAAAAGAAAAA…	ATCTCCGTTGCACTCTTTGCAAGCATTACCGCTTGTGGTGCTTTCGGTGGTCTGCCAAGC CTAAAAAGCTCTTTTGTTCTGAGCGAGGACACAATCCCAGGGACAAACGAAACCGTAAAA ACGTTACTTCCCTACGGATCTGTGATCAACTATTACGGATACGTAAAGCCAGGACAAGCG CCGGACGGTTTAGTCGATGGAAACAAAAAAGCATACTATCTCTATGTTTGGATTCCTGCC GTAATCGCTGAAATGGGAGTTCGTATGATTTCCCCAACAGGCGAAATCGGTGAACCAGGC GACGGAGACTTAGTAAGCGACGCTTTCAAAGCGGCTACCCCAGAAGAAAAATCAATGCCA CATTGGTTTGATACTTGGATCCGTGTAGAAAGA…	GGAAATTGCGCAGCTACAGTCGATGTAGAATATCCGGTATTCCCGAAAGATAAAGAAGGC CGTGCACTTCAGAAATTCCTCGGAACCATTCGTAACGTAGGTTTGGCCGTTGAAGCTCCT AAAAAAAGTCTTTGGGAAGCAATTTTCGGTGAAGGTTCCAGCTTTATCGATCAGATGCCT TCTAAAGTTTTCGAGGCGTTTGACAAAGAATCTTATTACAAACTTACCGACCTAAGCAAA CGTGCAGACGCAATCAACGAAGCAAGTCTTTCTCTTACAGGAATCACTAAAAATAGAGCG AAGATCGGAAATCTGATTGGAGCGGAAGCAATTCTATACATAGGTTACCAAAAACCTTAT ACAGAGTGTAGTACTGAAAATAAAATCGATGCG…	CACGTGGGTAATCTTCCTCTGAGTCTGGGATAACTTTCCGAAAGGGAAGCTAATACTGGA TGGTCCCGAGAGATCATAAGATTTTTCGGGTAAAGATTTATTGCTCGGAGATGAGCCCGC GTCCGATTAGCTAGTTGGTGAGGTAAAGGCTCACCAAGGCGACGATCGGTAGCCGGCCTG AGAGGGTGTTCGGCCACAATGGAACTGAGACACGGTCCATACTCCTACGGGAGGCAGCAG TTAAGAATCTTGCTCAATGGGGGGAACCCTGAAGCAGCGACGCCGCGTGAACGATGAAGG TCTTCGGATTGTAAAGTTCAGTAAGCAGGGAAAAATAAGCAGCAATGTGATGATGGTACC TGCCTAAAGCACCGGCTAACTACGTGCCAGCAG…	ATGCCGATCATTTTTGCTTCGTCTTTGATTTTATTTCCTCAGACGATTATTCAATGGTTA TCTAATAGTAGTCAAGAATGGGCTGGATGGGCAGTGATTATGGATTTTTTTAATCCATTC TCTCAGATTTGGTATCATGCGTTATTTTATTTCGTAATTTATACCGCTTTAATTGTATTC TTTGCTTACTTCTATACAGCGATTCAGTTTAATCCTGCAGAATTGGCTGAGAATTTGAAA AAATACGGTGGATTCATTCCAGGAATTCGTCCGGGTTCTCACACAAAAGAATACATTGAA AAAGTGTTAAATAGAATCACTCTCCCTGGAGCTATGTTTCTTGCAGGTTTGGCATTAGCA CCTTATATTATTATAAAATTCTTAGATTTGAGC…
66	R11	L.interrogans	Brazil	Cattle	CTTTCTATTCCTCAGATTTCTACAGGAGATATTTTACGCGAGGCAGTAAAGAATCAAACT GCGATGGGAATAGAAGCAAAACGTTATATGGATGCGGGAGATTTGGTTCCAGATTCCGTA GTGATTGGAATCATAAAAGATCGCATTCGAGAAGCGGATTGTAAAAATGGATTTTTGTTG GATGGATTTCCGAGAACCGTGGAACAAGCGGAAGCTTTAGATACACTTTTAAAAAATGAA GGCAAGTCTATTGATAAAGCGATTAATCTTCAGGTTCCGGATGCGGAACTCTTAAAGAGA TTACTCGGCCGTGCAGAAATAGAAGGTCGCGCGGACGATAACGAAGTGACGATTAAAAAT CGTCTCGATAATTATAATAAGAAGACCTTACCT…	TATCTCGATATAGAACTGGATTATTATGATTTAGGCGTGGAGTACAGGGACAAAACGGAT GATAAAGTAACTGTGGATTCTGCTCACGCGATTCAAAAATATGGAGTAGGCGTAAAATGT GCGACGATTACTCCTAACCAAGATAGAGTTAAAGAATACAATCTCAAACAAGAATGGAAA TCTCCGAACGGAACCATTCGTTCTATTTTAGACGGAACCGTTTTTCGTAAACCGATCATC GTAAAAAATATTCCTCCTGCGGTTCGTTCTTGGAAAAAACCGATTACAGTAGGACGTCAC GCTTACGGAGATCTTTATAAGGACACAGAACTTTATATTCCCGAAGCCGGAAAGGTGGAA CTCGTTTATACCGGAAAGGACGGAAAAGAAAAA…	ATCTCCGTTGCACTCTTTGCAAGCATTACCGCTTGTGGTGCTTTCGGTGGTCTGCCAAGC CTAAAAAGCTCTTTTGTTCTGAGCGAGGACACAATCCCAGGGACAAACGAAACCGTAAAA ACGTTACTTCCCTACGGATCTGTGATCAACTATTACGGATACGTAAAGCCAGGACAAGCG CCGGACGGTTTAGTCGATGGAAACAAAAAAGCATACTATCTCTATGTTTGGATTCCTGCC GTAATCGCTGAAATGGGAGTTCGTATGATTTCCCCAACAGGCGAAATCGGTGAACCAGGC GACGGAGACTTAGTAAGCGACGCTTTCAAAGCGGCTACCCCAGAAGAAAAATCAATGCCA CATTGGTTTGATACTTGGATCCGTGTAGAAAGA…	GGAAATTGCGCAGCTACAGTCGATGTAGAATATCCGGTATTCCCGAAAGATAAAGAAGGC CGTGCACTTCAGAAATTCCTCGGAACCATTCGTAACGTAGGTTTGGCTGTTGAAGCTCCT AAAAAAAGTCTTTGGGAAGCAATTTTCGGTGAAGGTTCCAGCTTTATCGATCAGATGCCT TCTAAAGTTTTCGAGGCGTTTGACAAAGAATCTTATTACAAACTTACCGACCTGAGTAAA CGTGCAGACGCAATCAACGAAGCAAGTCTTTCTCTTACAGGAATCACTAAAAATAGAGCG AAGATCGGAAATCTGATTGGAGCGGAAGCAATTCTATACATAGGTTACCAAAAACCTTAT ACAGAGTGTAGTACTGAAAATAAAATCGATGCG…	CACGTGGGTAATCTTCCTCTGAGTCTGGGATAACTTTCCGAAAGGGAAGCTAATACTGGA TGGTCCCGAGAGATCATAAGATTTTTCGGGTAAAGATTTATTGCTCGGAGATGAGCCCGC GTCCGATTAGCTAGTTGGTGAGGTAAAGGCTCACCAAGGCGACGATCGGTAGCCGGCCTG AGAGGGTGTTCGGCCACAATGGAACTGAGACACGGTCCATACTCCTACGGGAGGCAGCAG TTAAGAATCTTGCTCAATGGGGGGAACCCTGAAGCAGCGACGCCGCGTGAACGATGAAGG TCTTCGGATTGTAAAGTTCAGTAAGCAGGGAAAAATAAGCAGCAATGTGATGATGGTACC TGCCTAAAGCACCGGCTAACTACGTGCCAGCAG…	ATGCCGATCATTTTTGCTTCGTCTTTGATTTTATTTCCTCAGACGATTATTCAATGGTTA TCTAATAGTAGTCAAGAATGGGCTGGATGGGCAGTGATTATGGATTTTTTTAATCCATTC TCTCAGATTTGGTATCATGCGTTATTTTATTTCGTAATTTATACCGCTTTAATTGTATTC TTTGCTTACTTTTATACAGCGATTCAGTTTAATCCTGCAGAATTGGCTGAGAATTTGAAA AAATACGGTGGGTTCATTCCAGGAATTCGTCCGGGTTCTCACACAAAAGAATACATTGAA AAAGTGTTAAATAGAATCACTCTTCCCGGAGCTATGTTTCTTGCAGGTTTGGCATTAGCA CCTTATATTATTATAAAATTCTTAGATTTGAGC…
67	R12	L.interrogans	Brazil	Cattle	CTTTCTATTCCTCAGATTTCTACAGGAGATATTTTACGCGAGGCAGTAAAGAATCAAACT GCGATGGGAATAGAAGCAAAACGTTATATGGATGCGGGAGACTTGGTTCCAGATTCCGTA GTGATTGGAATCATAAAAGATCGCATTCGAGAAGCGGATTGTAAAAATGGATTTTTGTTG GATGGATTTCCGAGAACCGTGGAACAAGCGGAAGCTTTAGATACACTTTTAAAAAATGAA GGCAAGTCTATTGATAAAGCGATTAATCTTCAGGTTCCGGATGCGGAACTCTTAAAGAGA TTACTCGGCCGTGCAGAAATAGAAGGTCGCGCGGACGATAACGAAGTGACGATTAAAAAT CGTCTCGATAATTATAATAAGAAGACCTTACCT…	TATCTCGATATAGAACTGGATTATTATGATTTAGGCGTGGAGTACAGGGACAAAACGGAT GATAAAGTAACTGTGGATTCTGCTCACGCGATTCAAAAATATGGAGTAGGCGTAAAATGT GCGACGATTACTCCTAACCAAGATAGAGTTAAAGAATACAATCTCAAACAAGAATGGAAA TCTCCGAACGGAACCATTCGTTCTATTTTAGACGGAACCGTTTTTCGTAAACCGATCATC GTAAAAAATATTCCTCCTGCGGTTCGTTCTTGGAAAAAACCGATTACAGTAGGACGTCAC GCTTACGGAGATCTTTATAAGGACACAGAACTTTATATTCCCGAAGCCGGAAAGGTGGAA CTCGTTTATACCGGAAAGGACGGAAAAGAAAAA…	ATCTCCGTTGCACTCTTTGCAAGCATTACCGCTTGTGGTGCTTTCGGTGGTCTGCCAAGC CTAAAAAGCTCTTTTGTTCTGAGCGAGGACACAATCCCAGGGACAAACGAAACCGTAAAA ACGTTACTTCCCTACGGATCTGTGATCAACTATTACGGATACGTAAAGCCAGGACAAGCG CCGGACGGTTTAGTCGATGGAAACAAAAAAGCATACTATCTCTATGTTTGGATTCCTGCC GTAATCGCTGAAATGGGAGTTCGTATGATTTCCCCAACAGGCGAAATCGGTGAGCCAGGC GACGGAGACTTAGTAAGCGACGCTTTCAAAGCGGCTACCCCAGAAGAAAAATCAATGCCA CATTGGTTTGATACTTGGATCCGTGTAGAAAGA…	GGAAATTGCGCAGCTACAGTCGATGTAGAATATCCGGTATTCCCGAAAGATAAAGAAGGC CGTGCACTTCAGAAATTCCTCGGAACCATTCGTAACGTAGGTTTGGCTGTTGAAGCTCCT AAAAAAAGTCTTTGGGAAGCAATTTTCGGTGAAGGTTCCAGCTTTATCGATCAGATGCCT TCTAAAGTTTTCGAGGCGTTTGACAAAGAATCTTATTACAAACTTACCGACCTGAGTAAA CGTGCAGACGCAATCAACGAAGCAAGTCTTTCTCTTACAGGAATCACTAAAAATAGAGCG AAGATCGGAAATCTGATTGGAGCGGAAGCAATTCTATACATAGGTTACCAAAAACCTTAT ACAGAGTGTAGTACTGAAAATAAAATCGATGCG…	CACGTGGGTAATCTTCCTCTGAGTCTGGGATAACTTTCCGAAAGGGAAGCTAATACTGGA TGGTCCCGAGAGATCATAAGATTTTTCGGGTAAAGATTTATTGCTCGGAGATGAGCCCGC GTCCGATTAGCTAGTTGGTGAGGTAAAGGCTCACCAAGGCGACGATCGGTAGCCGGCCTG AGAGGGTGTTCGGCCACAATGGAACTGAGACACGGTCCATACTCCTACGGGAGGCAGCAG TTAAGAATCTTGCTCAATGGGGGGAACCCTGAAGCAGCGACGCCGCGTGAACGATGAAGG TCTTCGGATTGTAAAGTTCAGTAAGCAGGGAAAAATAAGCAGCAATGTGATGATGGTACC TGCCTAAAGCACCGGCTAACTACGTGCCAGCAG…	ATGCCGATCATTTTTGCTTCGTCTTTGATTTTATTTCCTCAGACGATTATTCAATGGTTA TCTAATAGTAGTCAAGAATGGGCTGGATGGGCAGTGATTATGGATTTTTTTAATCCATTC TCTCAGATTTGGTATCATGCGTTATTTTATTTCGTAATTTATACCGCTTTAATTGTATTC TTTGCTTACTTTTATACAGCGATTCAGTTTAATCCTGCAGAATTGGCTGAGAATTTGAAA AAATACGGTGGGTTCATTCCAGGAATTCGTCCGGGTTCTCACACAAAAGAATACATTGAA AAAGTGTTAAATAGAATCACTCTTCCCGGAGCTATGTTTCTTGCAGGTTTGGCATTAGCA CCTTATATTATTATAAAATTCTTAGATTTGAGC…
68	R13	L.interrogans	Brazil	Cattle	CTTTCTATTCCTCAGATTTCTACAGGAGATATTTTACGCGAGGCAGTAAAGAATCAAACT GCGATGGGAATAGAAGCAAAACGTTATATGGATGCGGGAGATTTGGTTCCAGATTCCGTA GTGATTGGAATCATAAAAGATCGCATTCGAGAAGCGGATTGTAAAAATGGATTTTTGTTG GATGGATTTCCGAGAACCGTGGAACAAGCGGAAGCTTTAGATACACTTTTAAAAAATGAA GGCAAGTCTATTGATAAAGCGATTAATCTTCAGGTTCCGGATGCGGAACTCTTAAAGAGA TTACTCGGCCGTGCAGAAATAGAAGGTCGCGCGGACGATAACGAAGTGACGATTAAAAAT CGTCTCGATAATTATAATAAGAAGACCTTACCT…	TATCTCGATATAGAACTGGATTATTATGATTTAGGCGTGGAGTACAGGGACAAAACGGAT GATAAAGTAACTGTGGATTCTGCTCACGCGATTCAAAAATATGGAGTAGGCGTAAAATGT GCGACGATTACTCCTAACCAAGATAGAGTTAAAGAATACAATCTCAAACAAGAATGGAAA TCTCCGAACGGAACCATTCGTTCTATTTTAGACGGAACCGTTTTTCGTAAACCGATCATC GTAAAAAATATTCCTCCTGCGGTTCGTTCTTGGAAAAAACCGATTACAGTAGGACGTCAC GCTTACGGAGATCTTTATAAGGACACAGAACTTTATATTCCCGAAGCCGGAAAGGTGGAA CTCGTTTATACCGGAAAGGACGGAAAAGAAAAA…	ATCTCCGTTGCACTCTTTGCAAGCATTACCGCTTGTGGTGCTTTCGGTGGTCTGCCAAGC CTAAAAAGCTCTTTTGTTCTGAGCGAGGACACAATCCCAGGGACAAACGAAACCGTAAAA ACGTTACTTCCCTACGGATCTGTGATCAACTATTACGGATACGTAAAGCCAGGACAAGCG CCGGACGGTTTAGTCGATGGAAACAAAAAAGCATACTATCTCTATGTTTGGATTCCTGCC GTAATCGCTGAAATGGGAGTTCGTATGATTTCCCCAACAGGCGAAATCGGTGAACCAGGC GACGGAGACTTAGTAAGCGACGCTTTCAAAGCGGCTACCCCAGAAGAAAAATCAATGCCA CATTGGTTTGATACTTGGATCCGTGTAGAAAGA…	GGAAATTGCGCAGCTACAGTCGATGTAGAATATCCGGTATTCCCGAAAGATAAAGAAGGC CGTGCACTTCAGAAATTCCTCGGAACCATTCGTAACGTAGGTTTGGCCGTTGAAGCTCCT AAAAAAAGTCTTTGGGAAGCAATTTTCGGTGAAGGTTCCAGCTTTATCGATCAGATGCCT TCTAAAGTTTTCGAGGCGTTTGACAAAGAATCTTATTACAAACTTACCGACCTAAGCAAA CGTGCAGACGCAATCAACGAAGCAAGTCTTTCTCTTACAGGAATCACTAAAAATAGAGCG AAGATCGGAAATCTGATTGGAGCGGAAGCAATTCTATACATAGGTTACCAAAAACCTTAT ACAGAGTGTAGTACTGAAAATAAAATCGATGCG…	CACGTGGGTAATCTTCCTCTGAGTCTGGGATAACTTTCCGAAAGGGAAGCTAATACTGGA TGGTCCCGAGAGATCATAAGATTTTTCGGGTAAAGATTTATTGCTCGGAGATGAGCCCGC GTCCGATTAGCTAGTTGGTGAGGTAAAGGCTCACCAAGGCGACGATCGGTAGCCGGCCTG AGAGGGTGTTCGGCCACAATGGAACTGAGACACGGTCCATACTCCTACGGGAGGCAGCAG TTAAGAATCTTGCTCAATGGGGGGAACCCTGAAGCAGCGACGCCGCGTGAACGATGAAGG TCTTCGGATTGTAAAGTTCAGTAAGCAGGGAAAAATAAGCAGCAATGTGATGATGGTACC TGCCTAAAGCACCGGCTAACTACGTGCCAGCAG…	ATGCCGATCATTTTTGCTTCGTCTTTGATTTTATTTCCTCAGACGATTATTCAATGGTTA TCTAATAGTAGTCAAGAATGGGCTGGATGGGCAGTGATTATGGATTTTTTTAATCCATTC TCTCAGATTTGGTATCATGCGTTATTTTATTTCGTAATTTATACCGCTTTAATTGTATTC TTTGCTTACTTTTATACAGCGATTCAGTTTAATCCTGCAGAATTGGCTGAGAATTTGAAA AAATACGGTGGGTTCATTCCAGGAATTCGTCCGGGTTCTCACACAAAAGAATACATTGAA AAAGTGTTAAATAGAATCACTCTTCCCGGAGCTATGTTTCTTGCAGGTTTGGCATTAGCA CCTTATATTATTATAAAATTCTTAGATTTGAGC…
69	R17	L.interrogans	United Kingdom	Mouse	CTTTCTATTCCTCAGATTTCTACAGGAGATATTTTACGCGAGGCAGTAAAGAATCAAACT GCGATGGGAATAGAAGCAAAACGTTATATGGATGCGGGAGATTTGGTTCCAGATTCCGTA GTGATTGGAATCATAAAAGATCGCATTCGAGAAGCGGATTGTAAAAATGGATTTTTGTTG GATGGATTTCCGAGAACCGTGGAACAAGCGGAAGCTTTAGATACACTTTTAAAAAATGAA GGCAAGTCTATTGATAAAGCGATTAATCTTCAGGTTCCGGATGCGGAACTCTTAAAGAGA TTACTCGGCCGTGCAGAAATAGAAGGTCGCGCGGACGATAACGAAGTGACGATTAAAAAT CGTCTCGATAATTATAATAAGAAGACCTTACCT…	TATCTCGATATAGAACTGGATTATTATGATTTAGGCGTGGAGTACAGGGACAAAACGGAT GATAAAGTAACCGTGGATTCTGCTCACGCGATTCAAAAATATGGAGTAGGCGTAAAATGT GCGACGATTACTCCTAACCAAGATAGAGTTAAAGAATACAATCTCAAACAAGAATGGAAA TCTCCGAACGGAACCATTCGTTCTATTTTAGACGGAACCGTTTTTCGTAAACCGATCATC GTAAAAAATATTCCTCCTGCGGTTCGTTCTTGGAAAAAACCGATTACAGTAGGACGTCAC GCTTACGGAGATCTTTATAAGGACACAGAACTTTATATTCCCGAAGCCGGAAAGGTGGAA CTCGTTTATACCGGAAAGGACGGAAAAGAAAAA…	ATCTCCGTTGCACTCTTTGCAAGCATTACCGCTTGTGGTGCTTTCGGTGGTCTGCCAAGC CTAAAAAGCTCTTTTGTTCTGAGCGAGGACACAATCCCAGGGACAAACGAAACCGTAAAA ACGTTACTTCCCTACGGATCTGTGATCAACTATTACGGATACGTAAAGCCAGGACAAGCG CCGGACGGTTTAGTCGATGGAAACAAAAAAGCATACTATCTCTATGTTTGGATTCCTGCC GTAATCGCTGAAATGGGAGTTCGTATGATTTCCCCAACAGGCGAAATCGGTGAGCCAGGC GACGGAGACTTAGTAAGCGACGCTTTCAAAGCGGCTACCCCAGAAGAAAAATCAATGCCA CATTGGTTTGATACTTGGATCCGTGTAGAAAGA…	GGAAATTGCGCAGCTACAGTCGATGTAGAATATCCGGTATTCCCGAAAGATAAAGAAGGC CGTGCACTTCAGAAATTCCTCGGAACCATTCGTAACGTAGGTTTGGCCGTTGAAGCTCCT AAAAAAAGTCTTTGGGAAGCAATTTTCGGTGAAGGTTCCAGCTTTATCGATCAGATGCCT TCTAAAGTTTTCGAGGCGTTTGACAAAGAATCTTATTACAAACTTACCGACCTAAGTAAA CGTGCAGACGCAATCAACGAAGCAAGTCTTTCTCTTACAGGAATCACTAAAAATAGAGCG AAGATCGGAAATCTGATTGGAGCGGAAGCAATTCTATACATAGGTTACCAAAAACCTTAT ACAGAGTGTAGTACTGAAAATAAAATCGATGCA…	CACGTGGGTAATCTTCCTCTGAGTCTGGGATAACTTTCCGAAAGGGAAGCTAATACTGGA TGGTCCCGAGAGATCATAAGATTTTTCGGGTAAAGATTTATTGCTCGGAGATGAGCCCGC GTCCGATTAGCTAGTTGGTGAGGTAAAGGCTCACCAAGGCGACGATCGGTAGCCGGCCTG AGAGGGTGTTCGGCCACAATGGAACTGAGACACGGTCCATACTCCTACGGGAGGCAGCAG TTAAGAATCTTGCTCAATGGGGGGAACCCTGAAGCAGCGACGCCGCGTGAACGATGAAGG TCTTCGGATTGTAAAGTTCAGTAAGCAGGGAAAAATAAGCAGCAATGTGATGATGGTACC TGCCTAAAGCACCGGCTAACTACGTGCCAGCAG…	ATGCCGATCATTTTTGCTTCGTCTTTGATTTTATTTCCTCAGACGATTATTCAATGGTTA TCTAATAGTAGTCAAGAATGGGCTGGATGGGCAGTGATTATGGATTTTTTTAATCCATTC TCTCAGATTTGGTATCATGCGTTATTTTATTTCGTAATTTATACCGCTTTAATTGTATTC TTTGCTTACTTTTATACAGCGATTCAGTTTAATCCTGCAGAATTGGCTGAGAATTTGAAA AAATACGGTGGGTTCATTCCAGGAATTCGTCCGGGTTCTCACACAAAAGAATACATTGAA AAAGTGTTAAATAGAATCACTCTTCCCGGAGCTATGTTTCTTGCAGGTTTGGCATTAGCA CCTTATATTATTATAAAATTCTTAGATTTGAGC…
70	R18	L.interrogans	United Kingdom	Mouse	CTTTCTATTCCTCAGATTTCTACAGGAGATATTTTACGCGAGGCAGTAAAGAATCAAACT GCGATGGGAATAGAAGCAAAACGTTATATGGATGCGGGAGATTTGGTTCCAGATTCCGTA GTGATTGGAATCATAAAAGATCGCATTCGAGAAGCGGATTGTAAAAATGGATTTTTGTTG GATGGATTTCCGAGAACCGTGGAACAAGCGGAAGCTTTAGATACACTTTTAAAAAATGAA GGCAAGTCTATTGATAAAGCGATTAATCTTCAGGTTCCGGATGCGGAACTCTTAAAGAGA TTACTCGGCCGTGCAGAAATAGAAGGTCGCGCGGACGATAACGAAGTGACGATTAAAAAT CGTCTCGATAATTATAATAAGAAGACCTTACCT…	TATCTCGATATAGAACTGGATTATTATGATTTAGGCGTGGAGTACAGGGACAAAACGGAT GATAAAGTAACTGTGGATTCTGCTCACGCGATTCAAAAATATGGAGTAGGCGTAAAATGT GCGACGATTACTCCTAACCAAGATAGAGTTAAAGAATACAATCTCAAACAAGAATGGAAA TCTCCGAACGGAACCATTCGTTCTATTTTAGACGGAACCGTTTTTCGTAAACCGATCATC GTAAAAAATATTCCTCCTGCGGTTCGTTCTTGGAAAAAACCGATTACAGTAGGACGTCAC GCTTACGGAGATCTTTATAAGGACACAGAACTTTATATTCCCGAAGCCGGAAAGGTGGAA CTCGTTTATACCGGAAAGGACGGAAAAGAAAAA…	ATCTCCGTTGCACTCTTTGCAAGCATTACCGCTTGTGGTGCTTTCGGTGGTCTGCCAAGC CTAAAAAGCTCTTTTGTTCTGAGCGAGGACACAATCCCAGGGACAAACGAAACCGTAAAA ACGTTACTTCCCTACGGATCTGTGATCAACTATTACGGATACGTAAAGCCAGGACAAGCG CCGGACGGTTTAGTCGATGGAAACAAAAAAGCATACTATCTCTATGTTTGGATTCCTGCC GTAATCGCTGAAATGGGAGTTCGTATGATTTCCCCAACAGGCGAAATCGGTGAACCAGGC GACGGAGACTTAGTAAGCGACGCTTTCAAAGCGGCTACCCCAGAAGAAAAATCAATGCCA CATTGGTTTGATACTTGGATCCGTGTAGAAAGA…	GGAAATTGCGCAGCTACAGTCGATGTAGAATATCCGGTATTCCCGAAAGATAAAGAAGGC CGTGCACTTCAGAAATTCCTCGGAACCATTCGTAACGTAGGTTTGGCCGTTGAAGCTCCT AAAAAAAGTCTTTGGGAAGCAATTTTCGGTGAAGGTTCCAGCTTTATCGATCAGATGCCT TCTAAAGTTTTCGAGGCGTTTGACAAAGAATCTTATTACAAACTTACCGACCTAAGCAAA CGTGCAGACGCAATCAACGAAGCAAGTCTTTCTCTTACAGGAATCACTAAAAATAGAGCG AAGATCGGAAATCTGATTGGAGCGGAAGCAATTCTATACATAGGTTACCAAAAACCTTAT ACAGAGTGTAGTACTGAAAATAAAATCGATGCG…	CACGTGGGTAATCTTCCTCTGAGTCTGGGATAACTTTCCGAAAGGGAAGCTAATACTGGA TGGTCCCGAGAGATCATAAGATTTTTCGGGTAAAGATTTATTGCTCGGAGATGAGCCCGC GTCCGATTAGCTAGTTGGTGAGGTAAAGGCTCACCAAGGCGACGATCGGTAGCCGGCCTG AGAGGGTGTTCGGCCACAATGGAACTGAGACACGGTCCATACTCCTACGGGAGGCAGCAG TTAAGAATCTTGCTCAATGGGGGGAACCCTGAAGCAGCGACGCCGCGTGAACGATGAAGG TCTTCGGATTGTAAAGTTCAGTAAGCAGGGAAAAATAAGCAGCAATGTGATGATGGTACC TGCCTAAAGCACCGGCTAACTACGTGCCAGCAG…	ATGCCGATCATTTTTGCTTCGTCTTTGATTTTATTTCCTCAGACGATTATTCAATGGTTA TCTAATAGTAGTCAAGAATGGGCTGGATGGGCAGTGATTATGGATTTTTTTAATCCATTC TCTCAGATTTGGTATCATGCGTTATTTTATTTCGTAATTTATACCGCTTTAATTGTATTC TTTGCTTACTTTTATACAGCGATTCAGTTTAATCCTGCAGAATTGGCTGAGAATTTGAAA AAATACGGTGGGTTCATTCCAGGAATTCGTCCGGGTTCTCACACAAAAGAATACATTGAA AAAGTGTTAAATAGAATCACTCTTCCCGGAGCTATGTTTCTTGCAGGTTTGGCATTAGCA CCTTATATTATTATAAAATTCTTAGATTTGAGC…
71	R19	L.interrogans	United Kingdom	Unknown	CTTTCTATCCCTCAGATTTCTACGGGTGATATTTTACGGGAAGCCGTAAAAAATCGAACT CCAATGGGAATCGAAGCAAAACGTTATATGGACGCGGGCGACTTGGTTCCCGATTCCGTT GTGATCGGAATCATCCAAGACCGAATTCGGGAAGCGGATTGTAAGAACGGATTTTTATTG GATGGATTCCCGAGAACCGTGGAACAAGCGGATGCTTTGGATGCTCTTCTGAAGAACGAA GGAAAGTCCATCGATAAAGCGATCAATCTCGAAGTCCCAAATGGAGAACTTTTGAAACGA TTGCTCGGCCGTGCGGAGATCGAAGGACGCGCAGATGACAACGAAGCGACGATCAAAAAT CGTCTGGATAATTATAACAAAAAGACTTTACCT…	TATCTCGATATCGAACTGGACTATTATGATTTAGGCGTGGAATATAGGGATAAAACCGAC GATAAGGTTACCGTGGATTCCGCACACGCGATTCAAAAATACGGAGTGGGCGTAAAATGC GCGACCATCACTCCGAACCAAGATAGAGTGAAGGAATACAATCTCAAACAAGAATGGAAA TCTCCGAACGGAACGATTCGTTCGATTTTGGACGGAACCGTTTTTCGTAAACCGATCATA GTAAAAAATATCCCCCCTGCGGTTCGTTCTTGGAAAAAAGCGATTACGGTCGGACGTCAC GCTTACGGGGATCTTTATAAGGACACCGAAATTTACATTCCGGAAGCCGGAAAAGTGGAA CTCGTTTATACCGGAAAAGACGGAAAAGAAAAA…	ATCTCCGTTGCACTCTTTGCAAGCATTACCGCTTGTGGTGCTTTCGGTGGTCTGCCAAGC CTAAAAAGCTCTTTTGTTCTGAGCGAGGACACAATCCCAGGGACAAACGAAACCGTAAAA ACGTTACTTCCCTACGGATCTGTGATCAACTATTACGGATACGTAAAGCCAGGACAAGCG CCGGACGGTTTAGTCGATGGAAACAAAAAAGCATACTATCTCTATGTTTGGATTCCTGCC GTAATCGCTGAAATGGGAGTTCGTATGATTTCCCCAACAGGCGAAATCGGTGAACCAGGC GACGGAGACTTAGTAAGCGACGCTTTCAAAGCGGCTACCCCAGAAGAAAAATCAATGCCA CATTGGTTTGATACTTGGATCCGTGTAGAAAGA…	GGAAATTGCGCAGCTACAGTCGATGTAGAATATCCGGTATTCCCGAAAGATAAAGAAGGC CGTGCACTTCAGAAATTCCTCGGAACCATTCGTAACGTAGGTTTGGCCGTTGAAGCTCCT AAAAAAAGTCTTTGGGAAGCAATTTTCGGTGAAGGTTCCAGCTTTATCGATCAGATGCCT TCTAAAGTTTTCGAGGCGTTTGACAAAGAATCTTATTACAAACTTACCGACCTAAGCAAA CGTGCAGACGCAATCAACGAAGCAAGTCTTTCTCTTACAGGAATCACTAAAAATAGAGCG AAGATCGGAAATCTGATTGGAGCGGAAGCAATTCTATACATAGGTTACCAAAAACCTTAT ACAGAGTGTAGTACTGAAAATAAAATCGATGCG…	CACGTGGGTAATCTTCCTTCGAGTCTGGGATAACTTTCCGAAAGGGGAGCTAATACTGGA TAGTCCCGATAGATCATAGGATGTATCGGGTAAAGATTCATTGCTCGGAGATGAGCCCGC GTCCGATTAGCTAGTTGGTGAGGTAAAGGCTCACCAAGGCGACGATCGGTAGCCGGCCTG AGAGGGTGTTCGGCCACAATGGAACTGAGACACGGTCCATACTCCTACGGGAGGCAGCAG TTAAGAATCTTGCTCAATGGGGGGAACCCTGAAGCAGCGACGCCGCGTGAACGATGAAGG TCTTCGGATTGTAAAGTTCAATAAGCAGGGAAAAATAAGCAGCGATGTGATGATGGTACC TGCCTAAAGCACCGGCTAACTACGTGCCAGCAG…	ATGCCGATCATTTTTGCTTCGTCTTTGATTTTATTTCCTCAGACGATTATTCAATGGTTA TCTAATAGTAGTCAAGAATGGGCTGGATGGGCAGTGATTATGGATTTTTTTAATCCATTC TCTCAGATTTGGTATCATGCGTTATTTTATTTCGTAATTTATACCGCTTTAATTGTATTC TTTGCTTACTTTTATACAGCGATTCAGTTTAATCCTGCAGAATTGGCTGAGAATTTGAAA AAATACGGTGGGTTCATTCCAGGAATTCGTCCGGGTTCTCACACAAAAGAATACATTGAA AAAGTGTTAAATAGAATCACTCTTCCCGGAGCTATGTTTCTTGCAGGTTTGGCATTAGCA CCTTATATTATTATAAAATTCTTAGATTTGAGC…
72	R27	L.interrogans	Costa Rica	Human	CTTTCTATTCCTCAGATTTCTACAGGAGATATTTTACGCGAGGCAGTAAAGAATCAAACT GCGATGGGAATAGAAGCAAAACGTTATATGGATGCGGGAGACTTGGTTCCAGATTCCGTA GTGATTGGAATCATAAAAGATCGCATTCGAGAAGCGGATTGTAAAAATGGATTTTTGTTG GATGGATTTCCGAGAACCGTGGAACAAGCGGAAGCTTTAGATACACTTTTAAAAAATGAA GGCAAGTCTATTGATAAAGCGATTAATCTTCAGGTTCCGGATGCGGAACTCTTAAAGAGA TTACTCGGCCGTGCAGAAATAGAAGGTCGCGCGGACGATAACGAAGTGACGATTAAAAAT CGTCTCGATAATTATAATAAGAAGACCTTACCT…	TATCTCGATATCGAACTGGACTATTATGATTTAGGCGTGGAATATAGGGATAAAACCGAC GATAAGGTTACCGTGGATTCCGCACACGCGATTCAAAAATACGGAGTGGGCGTAAAATGC GCGACCATCACTCCGAACCAAGATAGAGTGAAGGAATACAATCTCAAACAAGAATGGAAA TCTCCGAACGGAACGATTCGTTCGATTTTGGACGGAACCGTTTTTCGTAAACCGATCATA GTAAAAAATATCCCCCCTGCGGTTCGTTCTTGGAAAAAAGCGATTACGGTCGGACGTCAC GCTTACGGGGATCTTTATAAGGACACCGAAATTTACATTCCGGAAGCCGGAAAAGTGGAA CTCGTTTATACCGGAAAAGACGGAAAAGAAAAA…	ATCTCCGTTGCACTCTTTGCAAGCATTACCGCTTGTGGTGCTTTCGGTGGTCTGCCAAGC CTAAAAAGCTCTTTTGTTCTGAGCGAGGACACAATCCCAGGGACAAACGAAACCGTAAAA ACGTTACTTCCCTACGGATCTGTGATCAACTATTACGGATACGTAAAGCCAGGACAAGCG CCGGACGGTTTAGTCGATGGAAACAAAAAAGCATACTATCTCTATGTTTGGATTCCTGCC GTAATCGCTGAAATGGGAGTTCGTATGATTTCCCCAACAGGCGAAATCGGTGAGCCAGGC GACGGAGACTTAGTAAGCGACGCTTTCAAAGCGGCTACCCCAGAAGAAAAATCAATGCCA CATTGGTTTGATACTTGGATCCGTGTAGAAAGA…	GGAAATTGCGCAGCTACAGTCGATGTAGAATATCCGGTATTCCCGAAAGATAAAGAAGGC CGTGCACTTCAGAAATTCCTCGGAACAATTCGTAACGTAGGTTTGGCGGTCGAACCTCCG AAGAAAAGTCTTTGGGAAGCGATCTTCGGAGAAGGTTCCAGTTTTATCGATCAAATGCCC TCTAAAGTTTTCGAAGCATTCGATAAGGAATCTTATTACAAACTTACCGACCTTAGCAAA CGCGCCGATATTCTTAACGAAGCGACTCTTTCCCTTACGGGAATCACTAAGTCCAGAGCG AAGATCGGAAACCTGATCGGAGCGGAAGCGATTCTTTATATCGGATATCAAAAACCTTAT ACCGAGTGCAGTACTGAAAACAAAATCGACGCG…	CACGTGGGTAATCTTCCTCCGAGTCTGGGATAACTTTCCGAAAGGGGAGCTAATACTGGA TAGTCCCGATAGATCATAGGATGTATCGGGTAAAGATTCATTGCTCGGAGATGAGCCCGC GTCCGATTAGCTAGTTGGTGAGGTAAAGGCTCACCAAGGCGACGATCGGTAGCCGGCCTG AGAGGGTGTTCGGCCACAATGGAACTGAGACACGGTCCATACTCCTACGGGAGGCAGCAG TTAAGAATCTTGCTCAATGGGGGGAACCCTGAAGCAGCGACGCCGCGTGAACGATGAAGG TCTTCGGATTGTAAAGTTCAATAAGCAGGGAAAAATAAGCAGCGATGTGATGATGGTACC TGCCTAAAGCACCGGCTAACTACGTGCCAGCAG…	ATGCCGATCATTTTTGCTTCGGCTTTGATCCTAATTCCTCAGACGATTATTCAATGGTTA TCTTCCAGCAGCGAACAGTGGGCGGGTTGGGCGATCATTATGGACTTTTTCAATCCGTTC TCCCAGATCTGGTATCACGCATTGTTTTACTTTGTGATCTATACTTCTTTGATTATTTTC TTCGCATACTTTTACACTGCGATTCAGTTCAACCCTGCGGAGTTGTCCGAAAACCTGAAG AAATACGGCGGGTTCATTCCCGGTATTCGCCCCGGCTCTCACACAAAAGAATACATCGAA AAGGTGTTAAATAGAATCACACTTCCCGGCGCGATGTTCCTCGCGGGATTGGCTCTGGCT CCTTACATCATCATTAAATTCTTAGATCTTAGT…
73	R28	L.interrogans	Costa Rica	Human	CTTTCTATCCCTCAGATTTCTACGGGTGATATTTTACGGGAGGCCGTAAAAAATCGAACT CCAATGGGAATCGAAGCAAAACGTTATATGGACGCGGGTGATTTGGTGCCCGATTCCGTT GTGATCGGAATCATCCAAGACCGAATTCGGGAAGCGGATTGTAAGAACGGATTTTTATTG GATGGATTCCCGAGAACCGTGGAACAAGCGGATGCTTTGGATGCTCTTCTGAAGAACGAA GGAAAGTCCATCGATAAAGCGATCAATCTCGAAGTCCCAAATGGAGAACTTTTGAAACGA TTGCTCGGCCGTGCGGAGATCGAAGGACGCGCAGATGACAACGAAGCGACGATCAAAAAT CGTCTGGATAATTATAACAAAAAGACTTTACCT…	TATCTCGATATCGAACTGGACTATTATGATTTAGGCGTGGAATATAGGGATAAAACCGAC GATAAGGTTACCGTGGATTCCGCACACGCGATTCAAAAATACGGAGTGGGCGTAAAATGC GCGACCATCACTCCGAACCAAGATAGAGTGAAGGAATACAATCTCAAACAAGAATGGAAA TCTCCGAACGGAACGATTCGTTCGATTTTGGACGGAACCGTTTTTCGTAAACCGATCATA GTAAAAAATATCCCCCCTGCGGTTCGTTCTTGGAAAAAAGCGATTACGGTCGGACGTCAC GCTTACGGGGATCTTTATAAGGACACCGAAATTTACATTCCCGAAGCCGGAAAAGTGGAA CTCGTTTATACCGGAAAAGACGGAAAAGAAAAA…	ATCTCCGTTGCACTCTTTGCAAGCATTACCGCTTGTGGTGCTTTCGGTGGTCTGCCAAGC CTTAAAAGCTCTTTTGTTCTGAGCGAGAGCACAGTTCCGGGAACAAACGAAACCGTAAAA ACGTTCCTTCCCTATGGATCTGTGATCAACTATTACGGATATGTAAAGCCAGGACAAGCG CCGGATGGCTTAGTCGACGGAAACAAAAAAGCATACTATCTCTATGTTTGGATTCCAGCT GTAATCGCTGAAATGGGAGTTCGTATGATTTCCCCAACAGGCGAAATCGGTGAACCAGGC GACGGAGATTTAGTAAGTGATGCGTTCAAAGCGGCAACCCCAGAAGAAAAATCAATGCCA CATTGGTTTGATACTTGGATCCGTGTTGAAAGA…	GGAAATTGCGCAGCTACAGTCGATGTAGAATATCCGGTATTCCCGAAAGATAAAGAAGGC CGTGCACTTCAGAAATTCCTCGGAACAATTCGTAACGTAGGTTTGGCGGTCGAACCTCCG AAGAAAAGTCTTTGGGAAGCGATCTTCGGAGAAGGTTCCAGTTTTATCGATCAAATGCCC TCTAAAGTTTTCGAAGCATTCGATAAGGAATCTTATTACAAACTTACCGACCTTAGCAAA CGCGCCGATATTCTTAACGAAGCGACTCTTTCCCTTACGGGAATCACTAAGTCCAGAGCG AAGATCGGAAACCTGATCGGAGCGGAAGCGATTCTTTACATCGGATATCAAAAACCTTAT ACCGAGTGCAGTACTGAAAACAAAATCGACGCG…	CACGTGGGTAATCTTCCTCTGAGTCTGGGATAACTTTCCGAAAGGGGAGCTAATACTGGA TAGTCCCGATAGATCATAGGATGTATCGGGTAAAGATTCATTGCTCGGAGATGAGCCCGC GTCCGATTAGCTAGTTGGTGAGGTAAAGGCTCACCAAGGCGACGATCGGTAGCCGGCCTG AGAGGGTGTTCGGCCACAATGGAACTGAGACACGGTCCATACTCCTACGGGAGGCAGCAG TTAAGAATCTTGCTCAATGGGGGGAACCCTGAAGCAGCGACGCCGCGTGAACGATGAAGG TCTTCGGATTGTAAAGTTCAATAAGCAGGGAAAAATAAGCAGCGATGTGATGATGGTACC TGCCTAAAGCACCGGCTAACTACGTGCCAGCAG…	ATGCCGATCATTTTTGCTTCTTCCTTGATCCTGTTCCCACAGACGATCATTCAGTGGTTG TCTTCCAGCAGCGAACAGTGGGCGGGTTGGGCGATCATTATGGACTTTTTCAATCCGTTC TCCCAGATCTGGTATCACGCATTGTTCTACTTTGTGATCTATACTTCTTTGATTATTTTC TTCGCATACTTTTACACTGCGATTCAGTTCAACCCTGCGGAGTTGTCCGAAAATCTGAAG AAATACGGCGGGTTCATTCCAGGTATTCGTCCCGGTTCTCACACAAAAGAATACATCGAA AAGGTGTTAAACAGAATCACACTTCCCGGCGCGATGTTCCTCGCGGGATTGGCTCTGGCT CCTTACATCATCATTAAATTCTTAGATTTGAGC…
74	R29	L.interrogans	Costa Rica	Human	CTTTCTATTCCTCAGATTTCTACAGGAGATATTTTACGCGAGGCAGTAAAGAATCAAACT GCGATGGGAATAGAAGCAAAACGTTATATGGATGCGGGAGACTTGGTTCCAGATTCCGTA GTGATTGGAATCATAAAAGATCGCATTCGAGAAGCGGATTGTAAAAATGGATTTTTGTTG GATGGATTTCCGAGAACCGTGGAACAAGCGGAAGCTTTAGATACACTTTTAAAAAATGAA GGCAAGTCTATTGATAAAGCGATTAATCTTCAGGTTCCGGATGCGGAACTCTTAAAGAGA TTACTCGGCCGTGCAGAAATAGAAGGTCGCGCGGACGATAACGAAGTGACGATTAAAAAT CGTCTCGATAATTATAATAAGAAGACCTTACCT…	TATCTCGATATAGAACTGGATTATTATGATTTAGGCGTGGAGTACAGGGACAAAACGGAT GATAAAGTAACTGTGGATTCTGCTCACGCGATTCAAAAATATGGAGTAGGCGTAAAATGT GCGACGATTACTCCTAACCAAGATAGAGTTAAAGAATACAATCTCAAACAAGAATGGAAA TCTCCGAACGGAACCATTCGTTCTATTTTAGACGGAACCGTTTTTCGTAAACCGATCATC GTAAAAAATATTCCTCCTGCGGTTCGTTCTTGGAAAAAACCGATTACAGTAGGACGTCAC GCTTACGGAGATCTTTATAAGGACACAGAACTTTATATTCCCGAAGCCGGAAAGGTGGAA CTCGTTTATACCGGAAAGGACGGAAAAGAAAAA…	ATCTCCGTTGCACTCTTTGCAAGCATTACCGCTTGTGGTGCTTTCGGTGGTCTGCCAAGC CTAAAAAGCTCTTTTGTTCTGAGCGAGGACACAATCCCAGGGACAAACGAAACCGTAAAA ACGTTACTTCCCTACGGATCTGTGATCAACTATTACGGATACGTAAAGCCAGGACAAGCG CCGGACGGTTTAGTCGATGGAAACAAAAAAGCATACTATCTCTATGTTTGGATTCCTGCC GTAATCGCTGAAATGGGAGTTCGTATGATTTCCCCAACAGGCGAAATCGGTGAGCCAGGC GACGGAGACTTAGTAAGCGACGCTTTCAAAGCGGCTACCCCAGAAGAAAAATCAATGCCA CATTGGTTTGATACTTGGATCCGTGTAGAAAGA…	GGAAATTGCGCAGCTACAGTCGATGTAGAATATCCGGTATTCCCGAAAGATAAAGAAGGC CGAGCACTTCAGAAATTCCTCGGAACCATTCGTAACGTAGGTTTGGCTGTTGAAGCTCCT AAAAAAAGTCTTTGGGAAGCAATTTTCGGTGAAGGTTCCAGCTTTATCGATCAGATGCCT TCTAAAGTTTTCGAGGCGTTTGACAAAGAATCTTATTACAAACTTACCGACCTGAGTAAA CGTGCAGACGCAATCAACGAAGCAAGTCTTTCTCTTACAGGAATCACTAAAAATAGAGCG AAGATCGGAAATCTGATTGGAGCGGAAGCAATTCTATACATAGGTTACCAAAAACCTTAT ACAGAGTGTAGTACTGAAAATAAAATCGATGCA…	CACGTGGGTAATCTTCCTCTGAGTCTGGGATAACTTTCCGAAAGGGAAGCTAATACTGGA TGGTCCCGAGAGATCATAAGATTTTTCGGGTAAAGATTCATTGCTCGGAGATGAGCCCGC GTCCGATTAGCTAGTTGGTGAGGTAAAGGCTCACCAAGGCGACGATCGGTAGCCGGCCTG AGAGGGTGTTCGGCCACAATGGAACTGAGACACGGTCCATACTCCTACGGGAGGCAGCAG TTAAGAATCTTGCTCAATGGGGGGAACCCTGAAGCAGCGACGCCGCGTGAACGATGAAGG TCTTCGGATTGTAAAGTTCAGTAAGCAGGGAAAAATAAGCAGCAATGTGATGATGGTACC TGCCTAAAGCACCGGCTAACTACGTGCCAGCAG…	ATGCCGATCATTTTTGCTTCGTCTTTGATTTTATTTCCTCAGACGATTATTCAATGGTTA TCTAATAGTAGTCAAGAATGGGCTGGATGGGCAGTGATTATGGATTTTTTTAATCCATTC TCTCAGATTTGGTATCATGCGTTATTTTATTTCGTAATTTATACCGCTTTAATTGTATTC TTTGCTTACTTTTATACAGCGATTCAGTTTAATCCTGCAGAATTGGCTGAGAATTTGAAA AAATACGGTGGGTTCATTCCAGGAATTCGTCCGGGTTCTCACACAAAAGAATACATTGAA AAAGTGTTAAATAGAATCACTCTTCCCGGAGCTATGTTTCTTGCAGGTTTGGCATTAGCA CCTTATATTATTATAAAATTCTTAGATTTGAGC…
75	R30	L.interrogans	Costa Rica	Human	CTTTCTATTCCTCAGATTTCTACAGGAGATATTTTACGCGAGGCAGTAAAGAATCAAACT GCGATGGGAATAGAAGCAAAACGTTATATGGATGCGGGAGACTTGGTTCCAGATTCCGTA GTGATTGGAATCATAAAAGATCGCATTCGAGAAGCGGATTGTAAAAATGGATTTTTGTTG GATGGATTTCCGAGAACCGTGGAACAAGCGGAAGCTTTAGATACACTTTTAAAAAATGAA GGCAAGTCTATTGATAAAGCGATTAATCTTCAGGTTCCGGATGCGGAACTCTTAAAGAGA TTACTCGGCCGTGCAGAAATAGAAGGTCGCGCGGACGATAACGAAGTGACGATTAAAAAT CGTCTCGATAATTATAATAAGAAGACCTTACCT…	TATCTCGATATAGAACTGGATTATTATGATTTAGGCGTGGAGTACAGGGACAAAACGGAT GATAAAGTAACTGTGGATTCCGCTCACGCGATTCAAAAATATGGAGTAGGCGTAAAATGT GCGACGATTACTCCTAACCAAGATAGAGTTAAAGAATACAATCTCAAACAAGAATGGAAA TCTCCGAACGGAACCATTCGTTCTATTTTAGACGGAACCGTTTTTCGTAAACCGATCATC GTAAAAAATATTCCTCCTGCGGTTCGTTCTTGGAAAAAACCGATTACAGTAGGACGTCAC GCTTACGGAGATCTTTATAAGGACACAGAACTTTATATTCCCGAAGCCGGAAAGGTGGAA CTCGTTTATACCGGAAAGGACGGAAAAGAAAAA…	ATCTCCGTTGCACTCTTTGCAAGCATTACCGCTTGTGGTGCTTTCGGTGGTCTGCCAAGC CTAAAAAGCTCTTTTGTTCTGAGCGAGGACACAATCCCAGGGACAAACGAAACCGTAAAA ACGTTACTTCCCTACGGATCTGTGATCAACTATTACGGATACGTAAAGCCAGGACAAGCG CCGGACGGTTTAGTCGATGGAAACAAAAAAGCATACTATCTCTATGTTTGGATTCCTGCC GTAATCGCTGAAATGGGAGTTCGTATGATTTCCCCAACAGGCGAAATCGGTGAGCCAGGC GACGGAGACTTAGTAAGCGACGCTTTCAAAGCGGCTACCCCAGAAGAAAAATCAATGCCA CATTGGTTTGATACTTGGATCCGTGTAGAAAGA…	GGAAATTGCGCAGCTACAGTCGATGTAGAATATCCGGTATTCCCGAAAGATAAAGAAGGC CGTGCACTTCAGAAATTCCTCGGAACCATTCGTAACGTAGGTTTGGCTGTTGAAGCTCCT AAAAAAAGTCTTTGGGAAGCAATTTTCGGTGAAGGTTCCAGCTTTATCGATCAGATGCCT TCTAAAGTTTTCGAGGCGTTTGACAAAGAATCTTATTACAAACTTACCGACCTGAGTAAA CGTGCAGACGCAATCAACGAAGCAAGTCTTTCTCTTACAGGAATCACTAAAAATAGAGCG AAGATCGGAAATCTGATTGGAGCGGAAGCAATTCTATACATAGGTTACCAAAAACCTTAT ACAGAGTGTAGTACTGAAAATAAAATCGATGCA…	CACGTGGGTAATCTTCCTCTGAGTCTGGGATAACTTTCCGAAAGGGGAGCTAATACTGGA TAGTCCCGAGAGATCATAGGATTTTTCGGGTAAAGATTCATTGCTCGGAGATGAGCCCGC GTCCGATTAGCTAGTTGGTGAGGTAAAGGCTCACCAAGGCGACGATCGGTAGCCGGCCTG AGAGGGTGTTCGGCCACAATGGAACTGAGACACGGTCCATACTCCTACGGGAGGCAGCAG TTAAGAATCTTGCTCAATGGGGGGAACCCTGAAGCAGCGACGCCGCGTGAACGATGAAGG TCTTCGGATTGTAAAGTTCAATAAGCAGGGAAAAATAAGCAGCAATGTGATGATGGTACC TGCCTAAAGCACCGGCTAACTACGTGCCAGCAG…	ATGCCGATCATTTTTGCTTCTTCCTTGATCCTGTTCCCACAGACGATCATTCAGTGGTTG TCTTCCAGCAGCGAACAGTGGGCGGGTTGGGCGATCATTATGGACTTTTTCAATCCGTTC TCCCAGATCTGGTATCACGCATTGTTCTACTTTGTGATCTATACTTCTTTGATTATTTTC TTCGCATACTTTTACACTGCGATTCAGTTCAACCCTGCGGAGTTGTCCGAAAATCTGAAG AAATACGGCGGGTTCATTCCAGGTATTCGTCCCGGTTCTCACACAAAAGAATACATCGAA AAGGTGTTAAACAGAATCACACTTCCCGGCGCGATGTTCCTCGCGGGATTGGCTCTGGCT CCTTACATCATCATTAAATTCTTAGATTTGAGC…
76	R41	L.interrogans	Tanzania	Mastomys	CTTTCTATTCCTCAGATTTCTACAGGAGATATTTTACGCGAGGCAGTAAAGAATCAAACT GCGATGGGAATAGAAGCAAAACGTTATATGGATGCGGGAGACTTGGTTCCAGATTCCGTA GTGATTGGAATCATAAAAGATCGCATTCGAGAAGCGGATTGTAAAAATGGATTTTTGTTG GATGGATTTCCGAGAACCGTGGAACAAGCGGAAGCTTTAGATACACTTTTAAAAAATGAA GGCAAGTCTATTGATAAAGCGATTAATCTTCAGGTTCCGGATGCGGAACTCTTAAAGAGA TTACTCGGCCGTGCAGAAATAGAAGGTCGCGCGGACGATAACGAAGTGACGATTAAAAAT CGTCTCGATAATTATAATAAGAAGACCTTACCT…	TATCTCGATATAGAACTGGATTATTATGATTTAGGCGTGGAGTACAGGGACAAAACGGAT GATAAAGTAACCGTGGATTCTGCTCACGCGATTCAAAAATATGGAGTAGGCGTAAAATGT GCGACGATTACTCCTAACCAAGATAGAGTTAAAGAATACAATCTCAAACAAGAATGGAAA TCTCCGAACGGAACCATTCGTTCTATTTTAGACGGAACCGTTTTTCGTAAACCGATCATC GTAAAAAATATTCCTCCTGCGGTTCGTTCTTGGAAAAAACCGATTACAGTAGGACGTCAC GCTTACGGAGATCTTTATAAGGACACAGAACTTTATATTCCCGAAGCCGGAAAGGTGGAA CTCGTTTATACCGGAAAGGACGGAAAAGAAAAA…	ATCTCCGTTGCACTCTTTGCAAGCATTACCGCTTGTGGTGCTTTCGGTGGTCTGCCAAGC CTAAAAAGCTCTTTTGTTCTGAGCGAGGACACAATCCCAGGGACAAACGAAACCGTAAAA ACGTTACTTCCCTACGGATCTGTGATCAACTATTACGGATACGTAAAGCCAGGACAAGCG CCGGACGGTTTAGTCGATGGAAACAAAAAAGCATACTATCTCTATGTTTGGATTCCTGCC GTAATCGCTGAAATGGGAGTTCGTATGATTTCCCCAACAGGCGAAATCGGTGAACCAGGC GACGGAGACTTAGTAAGCGACGCTTTCAAAGCGGCTACCCCAGAAGAAAAATCAATGCCA CATTGGTTTGATACTTGGATCCGTGTAGAAAGA…	GGAAATTGCGCAGCTACAGTCGATGTAGAATATCCGGTATTCCCGAAAGATAAAGAAGGC CGTGCACTTCAGAAATTCCTCGGAACCATTCGTAACGTAGGTTTGGCTGTTGAAGCTCCT AAAAAAAGTCTTTGGGAAGCAATTTTCGGTGAAGGTTCCAGCTTTATCGATCAGATGCCT TCTAAAGTTTTCGAGGCGTTTGACAAAGAATCTTATTACAAACTTACCGACCTGAGTAAA CGTGCAGACGCAATCAACGAAGCAAGTCTTTCTCTTACAGGAATCACTAAAAATAGAGCG AAGATCGGAAATCTGATTGGAGCGGAAGCAATTCTATACATAGGTTACCAAAAACCTTAT ACAGAGTGTAGTACTGAAAATAAAATCGATGCA…	CACGTGGGTAATCTTCCTCTGAGTCTGGGATAACTTTCCGAAAGGGGAGCTAATACTGGA TAGTCCCGAGAGATCATAGGATTTTTCGGGTAAAGATTTATTGCTCGGAGATGAGCCCGC GTCCGATTAGCTAGTTGGTGAGGTAAAGGCTCACCAAGGCGACGATCGGTAGCCGGCCTG AGAGGGTGTTCGGCCACAATGGAACTGAGACACGGTCCATACTCCTACGGGAGGCAGCAG TTAAGAATCTTGCTCAATGGGGGGAACCCTGAAGCAGCGACGCCGCGTGAACGATGAAGG TCTTCGGATTGTAAAGTTCAGTAAGCAGGGAAAAATAAGCAGCGATGTGATGATGGTACC TGCCTAAAGCACCGGCTAACTACGTGCCAGCAG…	ATGCCGATCATTTTTGCTTCGTCTTTGATTTTATTTCCTCAGACGATTATTCAATGGTTA TCTAATAGTAGTCAAGAATGGGCTGGATGGGCAGTGATTATGGATTTTTTTAATCCATTC TCTCAGATTTGGTATCATGCGTTATTTTATTTCGTAATTTATACCGCTTTAATTGTATTC TTTGCTTACTTTTATACAGCGATTCAGTTTAATCCTGCAGAATTGGCTGAGAATTTGAAA AAATACGGTGGATTCATTCCAGGAATTCGTCCGGGTTCTCACACAAAAGAATATATTGAA AAAGTGTTAAATAGAATCACTCTTCCCGGAGCTATGTTTCTTGCAGGTTTGGCATTAGCA CCTTATATTATTATAAAATTCTTAGATTTGAGC…
77	R43	L.interrogans	Tanzania	Crocedura	CTTTCTATTCCTCAGATTTCTACAGGAGATATTTTACGCGAGGCAGTAAAGAATCAAACT GCGATGGGAATAGAAGCAAAACGTTATATGGATGCGGGAGACTTGGTTCCAGATTCCGTA GTGATTGGAATCATAAAAGATCGCATTCGAGAAGCGGATTGTAAAAATGGATTTTTGTTG GATGGATTTCCGAGAACCGTGGAACAAGCGGAAGCTTTAGATACACTTTTAAAAAATGAA GGCAAGTCTATTGATAAAGCGATTAATCTTCAGGTTCCGGATGCGGAACTCTTAAAGAGA TTACTCGGCCGTGCAGAAATAGAAGGTCGCGCGGACGATAACGAAGTGACGATTAAAAAT CGTCTCGATAATTATAATAAGAAGACCTTACCT…	TATCTCGATATAGAACTGGATTATTATGATTTAGGCGTGGAGTACAGGGACAAAACGGAT GATAAAGTAACCGTGGATTCTGCTCACGCGATTCAAAAATATGGAGTAGGCGTAAAATGT GCGACGATTACTCCTAACCAAGATAGAGTTAAAGAATACAATCTCAAACAAGAATGGAAA TCTCCGAACGGAACCATTCGTTCTATTTTAGACGGAACCGTTTTTCGTAAACCGATCATC GTAAAAAATATTCCTCCTGCGGTTCGTTCTTGGAAAAAACCGATTACAGTAGGACGTCAC GCTTACGGAGATCTTTATAAGGACACAGAACTTTATATTCCCGAAGCCGGAAAGGTGGAA CTCGTTTATACCGGAAAGGACGGAAAAGAAAAA…	ATCTCCGTTGCACTCTTTGCAAGCATTACCGCTTGTGGTGCTTTCGGTGGTCTGCCAAGC CTAAAAAGCTCTTTTGTTCTGAGCGAGGACACAATCCCAGGGACAAACGAAACCGTAAAA ACGTTACTTCCCTACGGATCTGTGATCAACTATTACGGATACGTAAAGCCAGGACAAGCG CCGGACGGTTTAGTCGATGGAAACAAAAAAGCATACTATCTCTATGTTTGGATTCCTGCC GTAATCGCTGAAATGGGAGTTCGTATGATTTCCCCAACAGGCGAAATCGGTGAACCAGGC GACGGAGACTTAGTAAGCGACGCTTTCAAAGCGGCTACCCCAGAAGAAAAATCAATGCCA CATTGGTTTGATACTTGGATCCGTGTAGAAAGA…	GGAAATTGCGCAGCTACAGTCGATGTAGAATATCCGGTATTTCCGAAAGATAAAGAAGGC CGTGCACTTCAGAAATTCCTCGGAACCATTCGTAACGTAGGTTTGGCTGTTGAAGCTCCT AAAAAAAGTCTTTGGGAAGCAATTTTCGGTGAAGGTTCCAGCTTTATCGATCAGATGCCT TCTAAAGTTTTCGAGGCGTTTGACAAAGAATCTTATTACAAACTTACCGACCTGAGTAAA CGTGCAGACGCAATCAACGAAGCAAGTCTTTCTCTTACAGGAATCACTAAAAATAGAGCG AAGATCGGAAATCTGATTGGAGCGGAAGCAATTCTATACATAGGTTACCAAAAACCTTAT ACAGAGTGTAGTACTGAAAATAAAATCGATGCA…	CACGTGGGTAATCTTCCTCTGAGTCTGGGATAACTTTCCGAAAGGGGAGCTAATACTGGA TGGTCCCGAGAGATCATAAGATTTTTCGGGTAAAGATTTATTGCTCGGAGATGAGCCCGC GTCCGATTAGCTAGTTGGTGAGGTAAAGGCTCACCAAGGCGACGATCGGTAGCCGGCCTG AGAGGGTGTTCGGCCACAATGGAACTGAGACACGGTCCATACTCCTACGGGAGGCAGCAG TTAAGAATCTTGCTCAATGGGGGGAACCCTGAAGCAGCGACGCCGCGTGAACGATGAAGG TCTTCGGATTGTAAAGTTCAGTAAGCAGGGAAAAATAAGCAGCAATGTGATGATGGTACC TGCCTAAAGCACCGGCTAACTACGTGCCAGCAG…	ATGCCGATCATTTTTGCTTCGTCTTTGATTTTATTTCCTCAGACGATTATTCAATGGTTA TCTAATAGTAGTCAAGAATGGGCTGGATGGGCAGTGATTATGGATTTTTTTAATCCATTC TCTCAGATTTGGTATCATGCGTTATTTTATTTCGTAATTTATACCGCTTTAATTGTATTC TTTGCTTACTTTTATACAGCGATTCAGTTTAATCCTGCAGAATTGGCTGAGAATTTGAAA AAATACGGTGGATTCATTCCAGGAATTCGTCCGGGTTCTCACACAAAAGAATATATTGAA AAAGTGTTAAATAGAATCACTCTTCCCGGAGCTATGTTTCTTGCAGGTTTGGCATTAGCA CCTTATATTATTATAAAATTCTTAGATTTGAGC…
78	R45	L.interrogans	Tanzania	Mastomys	CTTTCTATTCCTCAGATTTCTACAGGAGATATTTTACGCGAGGCAGTAAAGAATCAAACT GCGATGGGAATAGAAGCAAAACGTTATATGGATGCGGGAGACTTGGTTCCAGATTCCGTA GTGATTGGAATCATAAAAGATCGCATTCGAGAAGCGGATTGTAAAAATGGATTTTTGTTG GATGGATTTCCGAGAACCGTGGAACAAGCGGAAGCTTTAGATACACTTTTAAAAAATGAA GGCAAGTCTATTGATAAAGCGATTAATCTTCAGGTTCCGGATGCGGAACTCTTAAAGAGA TTACTCGGCCGTGCAGAAATAGAAGGTCGCGCGGACGATAACGAAGTGACGATTAAAAAT CGTCTCGATAATTATAATAAGAAGACCTTACCT…	TATCTCGATATAGAACTGGATTATTATGATTTAGGCGTGGAGTACAGGGACAAAACGGAT GATAAAGTAACCGTGGATTCTGCTCACGCGATTCAAAAATATGGAGTAGGCGTAAAATGT GCGACGATTACTCCTAACCAAGATAGAGTTAAAGAATACAATCTCAAACAAGAATGGAAA TCTCCGAACGGAACCATTCGTTCTATTTTAGACGGAACCGTTTTTCGTAAACCGATCATC GTAAAAAATATTCCTCCTGCGGTTCGTTCTTGGAAAAAACCGATTACAGTAGGACGTCAC GCTTACGGAGATCTTTATAAGGACACAGAACTTTATATTCCCGAAGCCGGAAAGGTGGAA CTCGTTTATACCGGAAAGGACGGAAAAGAAAAA…	ATCTCCGTTGCACTCTTTGCAAGCATTACCGCTTGTGGTGCTTTCGGTGGTCTGCCAAGC CTAAAAAGCTCTTTTGTTCTGAGCGAGGACACAATCCCAGGGACAAACGAAACCGTAAAA ACGTTACTTCCCTACGGATCTGTGATCAACTATTACGGATACGTAAAGCCAGGACAAGCG CCGGACGGTTTAGTCGATGGAAACAAAAAAGCATACTATCTCTATGTTTGGATTCCTGCC GTAATCGCTGAAATGGGAGTTCGTATGATTTCCCCAACAGGCGAAATCGGTGAACCAGGC GACGGAGACTTAGTAAGCGACGCTTTCAAAGCGGCTACCCCAGAAGAAAAATCAATGCCA CATTGGTTTGATACTTGGATCCGTGTAGAAAGA…	GGAAATTGCGCAGCTACAGTCGATGTAGAATATCCGGTTTTCCCGAAAGATAAAGAAGGC CGTGCACTTCAGAAATTCCTCGGAACCATTCGTAACGTAGGTTTGGCTGTTGAAGCTCCT AAAAAAAGTCTTTGGGAAGCAATTTTCGGTGAAGGTTCCAGCTTTATCGATCAGATGCCT TCTAAAGTTTTCGAGGCGTTTGACAAAGAATCTTATTACAAACTTACCGACCTGAGTAAA CGTGCAGACGCAATCAACGAAGCAAGTCTTTCTCTTACAGGAATCACTAAAAATAGAGCG AAGATCGGAAATCTGATTGGAGCGGAAGCAATTCTATACATAGGTTACCAAAAACCTTAT ACAGAGTGTAGTACTGAAAATAAAATCGATGCA…	CACGTGGGTAATCTTCCTCTGAGTCTGGGATAACTTTCCGAAAGGGAAGCTAATACTGGA TAGTCCCGAGAGATCATAAGATTTTTCGGGTAAAGATTTATTGCTCGGAGATGAGCCCGC GTCCGATTAGCTAGTTGGTGAGGTAAAGGCTCACCAAGGCGACGATCGGTAGCCGGCCTG AGAGGGTGTTCGGCCACAATGGAACTGAGACACGGTCCATACTCCTACGGGAGGCAGCAG TTAAGAATCTTGCTCAATGGGGGGAACCCTGAAGCAGCGACGCCGCGTGAACGATGAAGG TCTTCGGATTGTAAAGTTCAGTAAGCAGGGAAAAATAAGCAGCAATGTGATGATGGTACC TGCCTAAAGCACCGGCTAACTACGTGCCAGCAG…	ATGCCGATCATTTTTGCTTCGTCTTTGATTTTATTTCCTCAGACGATTATTCAATGGTTA TCTAATAGTAGTCAAGAATGGGCTGGATGGGCAGTGATTATGGATTTTTTTAATCCATTC TCTCAGATTTGGTATCATGCGTTATTTTATTTCGTAATTTATACCGCTTTAATTGTATTC TTTGCTTACTTTTATACAGCGATTCAGTTTAATCCTGCAGAATTGGCTGAGAATTTGAAA AAATACGGTGGATTCATTCCAGGAATTCGTCCGGGTTCTCACACAAAAGAATATATTGAA AAAGTGTTAAATAGAATCACTCTTCCCGGAGCTATGTTTCTTGCAGGTTTGGCATTAGCA CCTTATATTATTATAAAATTCTTAGATTTGAGC…
79	R46	L.interrogans	Tanzania	Mastomys	CTTTCTATTCCTCAGATTTCTACAGGAGATATTTTACGCGAGGCAGTAAAGAATCAAACT GCGATGGGAATAGAAGCAAAACGTTATATGGATGCGGGAGACTTGGTTCCAGATTCCGTA GTGATTGGAATCATAAAAGATCGCATTCGAGAAGCGGATTGTAAAAATGGATTTTTGTTG GATGGATTTCCGAGAACCGTGGAACAAGCGGAAGCTTTAGATACACTTTTAAAAAATGAA GGCAAGTCTATTGATAAAGCGATTAATCTTCAGGTTCCGGATGCGGAACTCTTAAAGAGA TTACTCGGCCGTGCAGAAATAGAAGGTCGCGCGGACGATAACGAAGTGACGATTAAAAAT CGTCTCGATAATTATAATAAGAAGACCTTACCT…	TATCTCGATATAGAACTGGATTATTATGATTTAGGCGTGGAGTACAGGGACAAAACGGAT GATAAAGTAACCGTGGATTCTGCTCACGCGATTCAAAAATATGGAGTAGGCGTAAAATGT GCGACGATTACTCCTAACCAAGATAGAGTTAAAGAATACAATCTCAAACAAGAATGGAAA TCTCCGAACGGAACCATTCGTTCTATTTTAGACGGAACCGTTTTTCGTAAACCGATCATC GTAAAAAATATTCCTCCTGCGGTTCGTTCTTGGAAAAAACCGATTACAGTAGGACGTCAC GCTTACGGAGATCTTTATAAGGACACAGAACTTTATATTCCCGAAGCCGGAAAGGTGGAA CTCGTTTATACCGGAAAGGACGGAAAAGAAAAA…	ATCTCCGTTGCACTCTTTGCAAGCATTACCGCTTGTGGTGCTTTCGGTGGTCTGCCAAGC CTAAAAAGCTCTTTTGTTCTGAGCGAGGACACAATCCCAGGGACAAACGAAACCGTAAAA ACGTTACTTCCCTACGGATCTGTGATCAACTATTACGGATACGTAAAGCCAGGACAAGCG CCGGACGGTTTAGTCGATGGAAACAAAAAAGCATACTATCTCTATGTTTGGATTCCTGCC GTAATCGCTGAAATGGGAGTTCGTATGATTTCCCCAACAGGCGAAATCGGTGAACCAGGC GACGGAGACTTAGTAAGCGACGCTTTCAAAGCGGCTACCCCAGAAGAAAAATCAATGCCA CATTGGTTTGATACTTGGATCCGTGTAGAAAGA…	GGAAATTGCGCAGCTACAGTCGATGTAGAATATCCGGTATTCCCGAAAGATAAAGAAGGC CGTGCACTTCAGAAATTCCTCGGAACCATTCGTAACGTAGGTTTGGCTGTTGAAGCTCCT AAAAAAAGTCTTTGGGAAGCAATTTTCGGTGAAGGTTCCAGCTTTATCGATCAGATGCCT TCTAAAGTTTTCGAGGCGTTTGACAAAGAATCTTATTACAAACTTACCGACCTGAGTAAA CGTGCAGACGCAATCAACGAAGCAAGTCTTTCTCTTACAGGAATCACTAAAAATAGAGCG AAGATCGGAAATCTGATTGGAGCGGAAGCAATTCTATACATAGGTTACCAAAAACCTTAT ACAGAGTGTAGTACTGAAAATAAAATCGATGCA…	CACGTGGGTAATCTTCCTCTGAGTCTGGGATAACTTTCCGAAAGGGAAGCTAATACTGGA TAGTCCCGAGAGATCATAAGATTTTTCGGGTAAAGATTTATTGCTCGGAGATGAGCCCGC GTCCGATTAGCTAGTTGGTGAGGTAAAGGCTCACCAAGGCGACGATCGGTAGCCGGCCTG AGAGGGTGTTCGGCCACAATGGAACTGAGACACGGTCCATACTCCTACGGGAGGCAGCAG TTAAGAATCTTGCTCAATGGGGGGAACCCTGAAGCAGCGACGCCGCGTGAACGATGAAGG TCTTCGGATTGTAAAGTTCAGTAAGCAGGGAAAAATAAGCAGCAATGTGATGATGGTACC TGCCTAAAGCACCGGCTAACTACGTGCCAGCAG…	ATGCCGATCATTTTTGCTTCGTCTTTGATTTTATTTCCTCAGACGATTATTCAATGGTTA TCTAATAGTAGTCAAGAATGGGCTGGATGGGCAGTGATTATGGATTTTTTTAATCCATTC TCTCAGATTTGGTATCATGCGTTATTTTATTTCGTAATTTATACCGCTTTAATTGTATTC TTTGCTTACTTTTATACAGCGATTCAGTTTAATCCTGCAGAATTGGCTGAGAATTTGAAA AAATACGGTGGATTCATTCCAGGAATTCGTCCGGGTTCTCACACAAAAGAATATATTGAA AAAGTGTTAAATAGAATCACTCTTCCCGGAGCTATGTTTCTTGCAGGTTTGGCATTAGCA CCTTATATTATTATAAAATTCTTAGATTTGAGC…
80	R50	L.interrogans	Tanzania	Crocedura	CTTTCTATTCCTCAGATTTCTACAGGAGATATTTTACGCGAGGCAGTAAAGAATCAAACT GCGATGGGAATAGAAGCAAAACGTTATATGGATGCGGGAGATTTGGTTCCAGATTCCGTA GTGATTGGAATCATAAAAGATCGCATTCGAGAAGCGGATTGTAAAAATGGATTTTTGTTG GATGGATTTCCGAGAACCGTGGAACAAGCGGAAGCTTTAGATACACTTTTAAAAAATGAA GGCAAGTCTATTGATAAAGCGATTAATCTTCAGGTTCCGGATGCGGAACTCTTAAAGAGA TTACTCGGCCGTGCAGAAATAGAAGGTCGCGCGGACGATAACGAAGTGACGATTAAAAAT CGTCTCGATAATTATAATAAGAAGACCTTACCT…	TATCTCGATATAGAACTGGATTATTATGATTTAGGCGTGGAGTACAGAGACAAAACGGAT GATAAAGTAACTGTGGATTCTGCTCACGCGATTCAAAAATATGGAGTAGGCGTAAAATGT GCGACGATTACTCCTAACCAAGATAGAGTTAAAGAATACAATCTCAAACAAGAATGGAAA TCTCCGAACGGAACCATTCGTTCTATTTTAGACGGAACCGTTTTTCGTAAACCGATCATC GTAAAAAATATTCCTCCTGCGGTTCGTTCTTGGAAAAAACCGATTACAGTAGGACGTCAC GCTTACGGAGATCTTTATAAGGACACAGAACTTTATATTCCCGAAGCCGGAAAGGTGGAA CTCGTTTATACCGGAAAGGACGGAAAAGAAAAA…	ATCTCCGTTGCACTCTTTGCAAGCATTACCGCTTGTGGTGCTTTCGGTGGTCTGCCAAGC CTAAAAAGCTCTTTTGTTCTGAGCGAGGACACAATCCCAGGGACAAACGAAACCGTAAAA ACGTTACTTCCCTACGGATCTGTGATCAACTATTACGGATACGTAAAGCCAGGACAAGCG CCGGACGGTTTAGTCGATGGAAACAAAAAAGCATACTATCTCTATGTTTGGATTCCTGCC GTAATCGCTGAAATGGGAGTTCGTATGATTTCCCCAACAGGCGAAATCGGTGAACCAGGC GACGGAGACTTAGTAAGCGACGCTTTCAAAGCGGCTACCCCAGAAGAAAAATCAATGCCA CATTGGTTTGATACTTGGATCCGTGTAGAAAGA…	GGAAATTGCGCAGCTACAGTCGATGTAGAATATCCGGTATTCCCGAAAGATAAAGAAGGC CGTGCACTTCAGAAATTCCTCGGAACCATTCGTAACGTAGGTTTGGCCGTTGAAGCTCCT AAAAAAAGTCTTTGGGAAGCAATTTTCGGTGAAGGTTCCAGCTTTATCGATCAGATGCCT TCTAAAGTTTTCGAGGCGTTTGACAAAGAATCTTATTACAAACTTACCGACCTAAGCAAA CGTGCAGACGCAATCAACGAAGCAAGTCTTTCTCTTACAGGAATCACTAAAAATAGAGCG AAGATCGGAAATCTGATTGGAGCGGAAGCAATTCTATACATAGGTTACCAAAAACCTTAT ACAGAGTGTAGTACTGAAAATAAAATCGATGCG…	CACGTGGGTAATCTTCCTCTGAGTCTGGGATAACTTTCCGAAAGGGAAGCTAATACTGGA TAGTCCCGAGAGATCATAAGATTTTTCGGGTAAAGATTTATTGCTCGGAGATGAGCCCGC GTCCGATTAGCTAGTTGGTGAGGTAAAGGCTCACCAAGGCGACGATCGGTAGCCGGCCTG AGAGGGTGTTCGGCCACAATGGAACTGAGACACGGTCCATACTCCTACGGGAGGCAGCAG TTAAGAATCTTGCTCAATGGGGGGAACCCTGAAGCAGCGACGCCGCGTGAACGATGAAGG TCTTCGGATTGTAAAGTTCAGTAAGCAGGGAAAAATAAGCAGCAATGTGATGATGGTACC TGCCTAAAGCACCGGCTAACTACGTGCCAGCAG…	ATGCCGATCATTTTTGCTTCGTCTTTGATTTTATTTCCTCAGACGATTATTCAATGGTTA TCTAATAGTAGTCAAGAATGGGCTGGATGGGCAGTGATTATGGATTTTTTTAATCCATTC TCTCAGATTTGGTATCATGCGTTATTTTATTTCGTAATTTATACCGCTTTAATTGTATTC TTTGCTTACTTTTATACAGCGATTCAGTTTAATCCTGCAGAATTGGCTGAGAATTTGAAA AAATACGGTGGATTCATTCCAGGAATTCGTCCGGGTTCTCACACAAAAGAATATATTGAA AAAGTGTTAAATAGAATCACTCTTCCCGGAGCTATGTTTCTTGCAGGTTTGGCATTAGCA CCTTATATTATTATAAAATTCTTAGATTTGAGC…
81	R51	L.interrogans	Tanzania	Crocedura	CTTTCTATTCCTCAGATTTCTACAGGAGATATTTTACGCGAGGCAGTAAAGAATCAAACT GCGATGGGAATAGAAGCAAAACGTTATATGGATGCGGGAGATTTGGTTCCAGATTCCGTA GTGATTGGAATCATAAAAGATCGCATTCGAGAAGCGGATTGTAAAAATGGATTTTTGTTG GATGGATTTCCGAGAACCGTGGAACAAGCGGAAGCTTTAGATACACTTTTAAAAAATGAA GGCAAGTCTATTGATAAAGCGATTAATCTTCAGGTTCCGGATGCGGAACTCTTAAAGAGA TTACTCGGCCGTGCAGAAATAGAAGGTCGCGCGGACGATAACGAAGTGACGATTAAAAAT CGTCTCGATAATTATAATAAGAAGACCTTACCT…	TATCTCGATATAGAACTGGATTATTATGATTTAGGCGTGGAGTACAGGGACAAAACGGAT GATAAAGTAACTGTGGATTCTGCTCACGCGATTCAAAAATATGGAGTAGGCGTAAAATGT GCGACGATTACTCCTAACCAAGATAGAGTTAAAGAATACAATCTCAAACAAGAATGGAAA TCTCCGAACGGAACCATTCGTTCTATTTTAGACGGAACCGTTTTTCGTAAACCGATCATC GTAAAAAATATTCCTCCTGCGGTTCGTTCTTGGAAAAAACCGATTACAGTAGGACGTCAC GCTTACGGAGATCTTTATAAGGACACAGAACTTTATATTCCCGAAGCCGGAAAGGTGGAA CTCGTTTATACCGGAAAGGACGGAAAAGAAAAA…	ATCTCCGTTGCACTCTTTGCAAGCATTACCGCTTGTGGTGCTTTCGGTGGTCTGCCAAGC CTAAAAAGCTCTTTTGTTCTGAGCGAGGACACAATCCCAGGGACAAACGAAACCGTAAAA ACGTTACTTCCCTACGGATCTGTGATCAACTATTACGGATACGTAAAGCCAGGACAAGCG CCGGACGGTTTAGTCGATGGAAACAAAAAAGCATACTATCTCTATGTTTGGATTCCTGCC GTAATCGCTGAAATGGGAGTTCGTATGATTTCCCCAACAGGCGAAATCGGTGAACCAGGC GACGGAGACTTAGTAAGCGACGCTTTCAAAGCGGCTACCCCAGAAGAAAAATCAATGCCA CATTGGTTTGATACTTGGATCCGTGTAGAAAGA…	GGAAATTGCGCAGCTACAGTCGATGTAGAATATCCGGTATTCCCGAAAGATAAAGAAGGC CGTGCACTTCAGAAATTCCTCGGAACCATTCGTAACGTAGGTTTGGCCGTTGAAGCTCCT AAAAAAAGTCTTTGGGAAGCAATTTTCGGTGAAGGTTCCAGCTTTATCGATCAGATGCCT TCTAAAGTTTTCGAGGCGTTTGACAAAGAATCTTATTACAAACTTACCGACCTAAGCAAA CGTGCAGACGCAATCAACGAAGCAAGTCTTTCTCTTACAGGAATCACTAAAAATAGAGCG AAGATCGGAAATCTGATTGGAGCGGAAGCAATTCTATACATAGGTTACCAAAAACCTTAT ACAGAGTGTAGTACTGAAAATAAAATCGATGCG…	CACGTGGGTAATCTTCCTCTGAGTCTGGGATAACTTTCCGAAAGGGAAGCTAATACTGGA TAGTCCCGAGAGATCATAAGATTTTTCGGGTAAAGATTTATTGCTCGGAGATGAGCCCGC GTCCGATTAGCTAGTTGGTGAGGTAAAGGCTCACCAAGGCGACGATCGGTAGCCGGCCTG AGAGGGTGTTCGGCCACAATGGAACTGAGACACGGTCCATACTCCTACGGGAGGCAGCAG TTAAGAATCTTGCTCAATGGGGGGAACCCTGAAGCAGCGACGCCGCGTGAACGATGAAGG TCTTCGGATTGTAAAGTTCAGTAAGCAGGGAAAAATAAGCAGCAATGTGATGATGGTACC TGCCTAAAGCACCGGCTAACTACGTGCCAGCAG…	ATGCCGATCATTTTTGCTTCGTCTTTGATTTTATTTCCTCAGACGATTATTCAATGGTTA TCTAATAGTAGTCAAGAATGGGCTGGATGGGCAGTGATTATGGATTTTTTTAATCCATTC TCTCAGATTTGGTATCATGCGTTATTTTATTTCGTAATTTATACCGCTTTAATTGTATTC TTTGCTTACTTTTATACAGCGATTCAGTTTAATCCTGCAGAATTGGCTGAGAATTTGAAA AAATACGGTGGATTCATTCCAGGAATTCGTCCGGGTTCTCACACAAAAGAATATATTGAA AAAGTGTTAAATAGAATCACTCTTCCCGGAGCTATGTTTCTTGCAGGTTTGGCATTAGCA CCTTATATTATTATAAAATTCTTAGATTTGAGC…
82	Ind2	L.interrogans	India	Unknown	CTTTCTATTCCTCAGATTTCTACAGGAGATATTTTACGCGAGGCAGTAAAGAATCAAACT GCGATGGGAATAGAAGCAAAACGTTATATGGATGCGGGAGATTTGGTTCCAGATTCCGTA GTGATTGGAATCATAAAAGATCGCATTCGAGAAGCGGATTGTAAAAATGGATTTTTGTTG GATGGATTTCCGAGAACCGTGGAACAAGCGGAAGCTTTAGATACACTTTTAAAAAATGAA GGCAAGTCTATTGATAAAGCGATTAATCTTCAGGTTCCGGATGCGGAACTCTTAAAGAGA TTACTCGGCCGTGCAGAAATAGAAGGTCGCGCGGACGATAACGAAGTGACGATTAAAAAT CGTCTCGATAATTATAATAAGAAGACCTTACCT…	TATCTCGATATAGAACTGGATTATTATGATTTAGGCGTGGAGTACAGGGACAAAACGGAT GATAAAGTAGCTGTGGCTTCTGCTCACGCGATTCAAAAATATGGAGTAGGCGTAAAATGT GCGACGATTACTCCTAACCAAGATAGAGTTAAAGAATACAATCTCAAACAAGAATGGAAA TCTCCGAACGGAACCATTCGTTCTATTTTAGACGGAACCGTTTTTCGTAAACCGATCATC GTAAAAAATATTCCTCCTGCGGTTCGTTCTTGGAAAAAACCGATTACAGTAGGACGTCAC GCCTACGGAGATCTTTATAAGGACACAGAACTTTATATTCCCGAAGCCGGAAAGGTGGAA CTCGTTTATACCGGAAAGGACGGAAAAGAAAAA…	ATCTCCGTTGCACTCTTTGCAAGCATTACCGCTTGTGGTGCTTTCGGTGGTCTGCCAAGC CTAAAAAGCTCTTTTGTTCTGAGCGAGGACACAATCCCAGGGACAAACGAAACCGTAAAA ACGTTACTTCCCTACGGATCTGTGATCAACTATTACGGATACGTAAAGCCAGGACAAGCG CCGGACGGTTTAGTCGATGGAAACAAAAAAGCATACTATCTCTATGTTTGGATTCCTGCC GTAATCGCTGAAATGGGAGTTCGTATGATTTCCCCAACAGGCGAAATCGGTGAACCAGGC GACGGAGACTTAGTAAGCGACGCTTTCAAAGCGGCTACCCCAGAAGAAAAATCAATGCCA CATTGGTTTGATACTTGGATCCGTGTAGAAAGA…	GGAAATTGCGCAGCTACAGTCGATGTAGAATATCCGGTATTCCCGAAAGATAAAGAAGGC CGTGCACTTCAGAAATTCCTCGGAACCATTCGTAACGTAGGTTTGGCCGTTGAAGCTCCT AAAAAAAGTCTTTGGGAAGCAATTTTCGGTGAAGGTTCCAGCTTTATCGATCAGATGCCT TCTAAAGTTTTCGAGGCGTTTGACAAAGAATCTTATTACAAACTTACCGACCTAAGCAAA CGTGCAGACGCAATCAACGAAGCAAGTCTTTCTCTTACAGGAATCACTAAAAATAGAGCG AAGATCGGAAATCTGATTGGAGCGGAAGCAATTCTATACATAGGTTACCAAAAACCTTAT ACAGAGTGTAGTACTGAAAATAAAATCGATGCG…	CACGTGGGTAATCTTCCTCTGAGTCTGGGATAACTTTCCGAAAGGGAAGCTAATACTGGA TGGTCCCGAGAGATCACAAGATTTTTCGGGTAAAGATTTATTGCTCGGAGATGAGCCCGC GTCCGATTAGCTAGTTGGTGAGGTAAAGGCTCACCAAGGCGACGATCGGTAGCCGGCCTG AGAGGGTGTTCGGCCACAATGGAACTGAGACACGGTCCATACTCCTACGGGAGGCAGCAG TTAAGAATCTTGCTCAATGGGGGGAACCCTGAAGCAGCGACGCCGCGTGAACGATGAAGG TCTTCGGATTGTAAAGTTCAGTAAGCAGGGAAAAATAAGCAGCAATGTGATGATGGTACC TGCCTAAAGCACCGGCTAACTACGTGCCAGCAG…	ATGCCGATCATTTTTGCTTCGTCTTTGATTTTATTTCCTCAGACGATTATTCAATGGTTA TCTAATAGTAGTCAAGAATGGGCTGGATGGGCAGTGATTATGGATTTTTTTAATCCATTC TCTCAGATTTGGTATCACGCGTTATTTTATTTCGTAATTTATACCGCTTTAATTGTATTC TTTGCTTACTTCTATACAGCGATTCAGTTTAATCCTGCAGAATTGGCTGAGAATTTGAAA AAATACGGTGGATTCATTCCAGGAATTCGTCCGGGTTCTCACACAAAAGAATACATTGAA AAAGTGTTAAATAGAATCACTCTCCCTGGAGCTATGTTTCTTGCAGGTTTGGCATTAGCA CCTTATATTATTATAAAATTCTTAGATTTGAGC…
83	Ind4	L.interrogans	India	Unknown	CTTTCTATTCCTCAGATTTCTACAGGAGATATTTTACGCGAGGCAGTAAAGAATCAAACT GCGATGGGAATAGAAGCAAAACGTTATATGGATGCGGGAGACTTGGTTCCAGATTCCGTA GTGATTGGAATCATAAAAGATCGCATTCGAGAAGCGGATTGTAAAAATGGATTTTTGTTG GATGGATTTCCGAGAACCGTGGAACAAGCGGAAGCTTTAGATACACTTTTAAAAAATGAA GGCAAGTCTATTGATAAAGCGATTAATCTTCAGGTTCCGGATGCGGAACTCTTAAAGAGA TTACTCGGCCGTGCAGAAATAGAAGGTCGCGCGGACGATAACGAAGTGACGATTAAAAAT CGTCTCGATAATTATAATAAGAAGACCTTACCT…	TATCTCGATATAGAACTGGATTATTATGATTTAGGCGTGGAGTACAGGGACAAAACGGAT GATAAAGTAGCTGTGGCTTCTGCTCACGCGATTCAAAAATATGGAGTAGGCGTAAAATGT GCGACGATTACTCCTAACCAAGATAGAGTTAAAGAATACAATCTCAAACAAGAATGGAAA TCTCCGAACGGAACCATTCGTTCTATTTTAGACGGAACCGTTTTTCGTAAACCGATCATC GTAAAAAATATTCCTCCTGCGGTTCGTTCTTGGAAAAAACCGATTACAGTAGGACGTCAC GCCTACGGAGATCTTTATAAGGACACAGAACTTTATATTCCCGAAGCCGGAAAGGTGGAA CTCGTTTATACCGGAAAGGACGGAAAAGAAAAA…	ATCTCCGTTGCACTCTTTGCAAGCATTACCGCTTGTGGTGCTTTCGGTGGTCTGCCAAGC CTAAAAAGCTCTTTTGTTCTGAGCGAGGACACAATCCCAGGGACAAACGAAACCGTAAAA ACGTTACTTCCCTACGGATCTGTGATCAACTATTACGGATACGTAAAGCCAGGACAAGCG CCGGACGGTTTAGTCGATGGAAACAAAAAAGCATACTATCTCTATGTTTGGATTCCTGCC GTAATCGCTGAAATGGGAGTTCGTATGATTTCCCCAACAGGCGAAATCGGTGAACCAGGC GACGGAGACTTAGTAAGCGACGCTTTCAAAGCGGCTACCCCAGAAGAAAAATCAATGCCA CATTGGTTTGATACTTGGATCCGTGTAGAAAGA…	GGAAATTGCGCAGCTACAGTCGATGTAGAATATCCGGTATTCCCGAAAGATAAAGAAGGC CGTGCACTTCAGAAATTCCTCGGAACCATTCGTAACGTAGGTTTGGCCGTTGAAGCTCCT AAAAAAAGTCTTTGGGAAGCAATTTTCGGTGAAGGTTCCAGCTTTATCGATCAGATGCCT TCTAAAGTTTTCGAGGCGTTTGACAAAGAATCTTATTACAAACTTACCGACCTAAGCAAA CGTGCAGACGCAATCAACGAAGCAAGTCTTTCTCTTACAGGAATCACTAAAAATAGAGCG AAGATCGGAAATCTGATTGGAGCGGAAGCAATTCTATACATAGGTTACCAAAAACCTTAT ACAGAGTGTAGTACTGAAAATAAAATCGATGCG…	CACGTGGGTAATCTTCCTCTGAGTCTGGGATAACTTTCCGAAAGGGAAGCTAATACTGGA TGGTCCCGAGAGATCATAAGATTTTTCGGGTAAAGATTTATTGCTCGGAGATGAGCCCGC GTCCGATTAGCTAGTTGGTGAGGTAAAGGCTCACCAAGGCGACGATCGGTAGCCGGCCTG AGAGGGTGTTCGGCCACAATGGAACTGAGACACGGTCCATACTCCTACGGGAGGCAGCAG TTAAGAATCTTGCTCAATGGGGGGAACCCTGAAGCAGCGACGCCGCGTGAACGATGAAGG TCTTCGGATTGTAAAGTTCAGTAAGCAGGGAAAAATAAGCAGCAATGTGATGATGGTACC TGCCTAAAGCACCGGCTAACTACGTGCCAGCAG…	ATGCCGATCATTTTTGCTTCGTCTTTGATTTTATTTCCTCAGACGATTATTCAATGGTTA TCTAATAGTAGTCAAGAATGGGCTGGATGGGCAGTGATTATGGATTTTTTTAATCCATTC TCTCAGATTTGGTATCATGCGTTATTTTATTTCGTAATTTATACCGCTTTAATTGTATTC TTTGCTTACTTTTATACAGCGATTCAGTTTAATCCTGCAGAATTGGCTGAGAATTTGAAA AAATACGGTGGATTCATTCCAGGAATTCGTCCGGGTTCTCACACAAAAGAATATATTGAA AAAGTGTTAAATAGAATCACTCTTCCCGGAGCTATGTTTCTTGCAGGTTTGGCATTAGCA CCTTATATTATTATAAAATTCTTAGATTTGAGC…
84	Ind6	L.interrogans	India	Unknown	CTTTCTATTCCTCAGATTTCTACAGGAGATATTTTACGCGAGGCCGTAAAGAATCAAACT GCGATGGGAATAGAAGCAAAACGTTATATGGATGCGGGAGATTTGGTTCCTGATTCCGTG GTGATTGGAATCATAAAAGATCGCATTCGAGAAGCGGATTGTAAAAACGGATTTTTGTTG GATGGATTTCCGAGAACCGTGGAACAAGCGGAAGCTCTAGATACACTTCTAAAAAATGAA GGCAAGTCTATTGATAAAGCGATTAATCTTCAGGTTCCGGATGCGGAACTCTTTAAAAGA TTACTCGGCCGTGCAGAAATCGAAGGGCGCGCGGACGATAACGAAGCGACGATTCAAAAT CGTCTCGATAATTACAATAAGAAGACCTTACCT…	TATCTCGATATCGAACTGGACTATTATGATTTAGGCGTGGAGCATAGGGATAAAACGGAT GATAAAGTAGCCGTAGATTCCGCACACGCGATTCAAAAATACGGAGTGGGCGTAAAATGT GCGACCATCACTCCGAATCAGGATAGAGTGAAGGAATACAACCTCAAGCAAGAATGGAAA TCTCCGAACGGAACGATTCGTTCGATTTTGGACGGAACTGTTTTTCGTAAACCGATTATA GTAAAAAATATTCCTCCTGCCGTTCGCTCTTGGAAAAAACCGATTACGGTCGGACGTCAC GCTTATGGGGATCTTTATAAGGATACTGAACTTTACATTCCCGAAGCCGGAAAAGTGGAA CTCGTTTATACCGGAAAAGACGGAAAGGAAAAA…	ATCTCCGTTGCACTCTTTGCAAGCATTACCGCTTGTGGTGCTTTCGGTGGTTTGCCAAGC CTTAAAAGCTCTTTTGTTCTGAGCGAGAGCACAGTTCCAGGAACAAACGAAACCGTAAAA ACGTTCCTTCCCTATGGATCTGTGATCAACTATTACGGATATGTAAAGCCAGGACAAGCG CCGGACGGTTTAGTCGACGGAAACAAAAAAGCATACTATCTCTATGTTTGGATCCCAGCT GTAATCGCTGAAATGGGAGTTCGTATGATTTCCCCAACAGGCGAAATCGGGGAACCAGGC GACGGAGACTTAGTAAGCGATGCTTTCAAAGCGGCAACCCCGGAAGAAAAATCAATGCCA CATTGGTTTGATACCTGGATCCGTGTAGAAAGA…	GGAAATTGCGCAGCTACAGTCGATGTAGAATATCCGGTATTCCCGAAAGATAAAGAAGGC CGTGCACTTCAGAAATTCCTCGGAACAATTCGTAACGTAGGTTTGGCAGTCGAACCTCCG AAGAAAAGTCTTTGGGAAGCGATCTTCGGAGAAGGTTCCAGTTTTATCGATCAAATGCCT TCTAAAGTTTTCGAGGCATTCGATAAGGAATCTTATTACAAACTTACCGACCTCAGTAAA CGCGCCGATATTCTTAACGAAGCGACTCTTTCTCTCACAGGAATTACGAAAAGCAGAGCG AAGATCGGAAACCTGATCGGAGCCGAAGCGATTCTTTACATAGGTTATCAAAAACCCTAT ACAGAGTGTAGTACTGAAAATAAAATCGATGCG…	CACGTGGGTAATCTTCCTCTGAGTCTGGGATAACTTTCCGAAAGGGAAGCTAATACTGGA TGGTCCCGAGAGATCATAAGATTTTTCGGGTAAAGATTTATTGCTCGGAGATGAGCCCGC GTCCGATTAGCTAGTTGGTGAGGTAAAGGCTCACCAAGGCGACGATCGGTAGCCGGCCTG AGAGGGTGTTCGGCCACAATGGAACTGAGACACGGTCCATACTCCTACGGGAGGCAGCAG TTAAGAATCTTGCTCAATGGGGGGAACCCTGAAGCAGCGACGCCGCGTGAACGATGAAGG TCTTCGGATTGTAAAGTTCAGTAAGCAGGGAAAAATAAGCAGCAATGTGATGATGGTACC TGCCTAAAGCACCGGCTAACTACGTGCCAGCAG…	ATGCCGATCATTTTTGCTTCTTCCTTGATCCTGTTTCCACAGACGATCATTCAGTGGTTG TCTTCCAGTAGCGAACAATGGGCGGGTTGGGCGATCATTATGGACTTTTTCAATCCATTC TCCCAGATCTGGTATCATGCATTGTTCTACTATATAATCTATACTTCTTTGATCGTGTTC TTCGCATACTTTTATACTGCGATTCAGTTCAACCCTGCAGAGTTGGCGGAAAACCTGAAA AAATACGGCGGATTCATTCCAGGAATTCGTCCCGGTTCTCATACGAAAGAATACATCGAA AAAGTGTTAAACAGAATCACTCTCCCCGGTGCGATGTTCCTCGCGGGATTGGCCCTGGCT CCTTACATCATCATCAAATTCTTAGATTTGAGT…
85	Ind8	L.interrogans	India	Unknown	CTTTCTATTCCTCAGATTTCTACAGGAGATATTTTACGCGAGGCAGTAAAGAATCAAACT GCGATGGGAATAGAAGCAAAACGTTATATGGATGCGGGAGACTTGGTTCCAGATTCCGTA GTGATTGGAATCATAAAAGATCGCATTCGAGAAGCGGATTGTAAAAATGGATTTTTGTTG GATGGATTTCCGAGAACCGTGGAACAAGCGGAAGCTTTAGATACACTTTTAAAAAATGAA GGCAAGTCTATTGATAAAGCGATTAATCTTCAGGTTCCGGATGCGGAACTCTTAAAGAGA TTACTCGGCCGTGCAGAAATAGAAGGTCGCGCGGACGATAACGAAGTGACGATTAAAAAT CGTCTCGATAATTATAATAAGAAGACCTTACCT…	TATCTCGATATAGAACTGGATTATTATGATTTAGGCGTGGAGTACAGGGACAAAACGGAT GATAAAGTAGCCGTGGATTCTGCTCACGCGATTCAAATATATGGAGTAGGCGTAAAATGT GCGCCGATTACTCCTAACCAAGATAGAGTTAAAGAATACAATCTCAAACAAGAATGGAAA TCTCCGAACGGAACCATTCGTTCTATTTTAGACGGAACCGTTTTTCGTAAACCGATCATC GTAAAAAATATTCCTCCTGCGGTTCGTTCTTGGAAAAAACCGATTACAGTAGGACGTCAC GCCTACGGAGATCTTTATAAGGACACAGAACTTTATATTCCCGAAGCCGGAAAGGTGGAA CTCGTTTATACCGGAAAGGACGGAAAAGAAAAA…	ATCTCCGTTGCACTCTTTGCAAGCATTACCGCTTGTGGTGCTTTCGGTGGTCTGCCAAGC CTAAAAAGCTCTTTTGTTCTGAGCGAGGACACAATCCCAGGGACAAACGAAACCGTAAAA ACGTTACTTCCCTACGGATCTGTGATCAACTATTACGGATACGTAAAGCCAGGACAAGCG CCGGACGGTTTAGTCGATGGAAACAAAAAAGCATACTATCTCTATGTTTGGATTCCTGCC GTAATCGCTGAAATGGGAGTTCGTATGATTTCCCCAACAGGCGAAATCGGTGAACCAGGC GACGGAGACTTAGTAAGCGACGCTTTCAAAGCGGCTACCCCAGAAGAAAAATCAATGCCA CATTGGTTTGATACTTGGATCCGTGTAGAAAGA…	GGAAATTGCGCAGCTACAGTCGATGTAGAATATCCGGTATTCCCGAAAGATAAAGAAGGC CGTGCACTTCAGAAATTCCTCGGAACCATTCGTAACGTAGGTTTGGCCGTTGAAGCTCCT AAAAAAAGTCTTTGGGAAGCAATTTTCGGTGAAGGTTCCAGCTTTATCGATCAGATGCCT TCTAAAGTTTTCGAGGCGTTTGACAAAGAATCTTATTACAAACTTACCGACCTAAGCAAA CGTGCAGACGCAATCAACGAAGCAAGTCTTTCTCTTACAGGAATCACTAAAAATAGAGCG AAGATCGGAAATCTGATTGGAGCGGAAGCAATTCTATACATAGGTTACCAAAAACCTTAT ACAGAGTGTAGTACTGAAAATAAAATCGATGCG…	CACGTGGGTAATCTTCCTCTGAGTCTGGGATAACTTTCCGAAAGGGAAGCTAATACTGGA TGGTCCCGAGAGATCATAAGATTTTTCGGGTAAAGATTTATTGCTCGGAGATGAGCCCGC GTCCGATTAGCTAGTTGGTGAGGTAAAGGCTCACCAAGGCGACGATCGGTAGCCGGCCTG AGAGGGTGTTCGGCCACAATGGAACTGAGACACGGTCCATACTCCTACGGGAGGCAGCAG TTAAGAATCTTGCTCAATGGGGGGAACCCTGAAGCAGCGACGCCGCGTGAACGATGAAGG TCTTCGGATTGTAAAGTTCAGTAAGCAGGGAAAAATAAGCAGCAATGTGATGATGGTACC TGCCTAAAGCACCGGCTAACTACGTGCCAGCAG…	ATGCCGATCATTTTTGCTTCGTCTTTGATTTTATTTCCTCAGACGATTATTCAATGGTTA TCTAATAGTAGTCAAGAATGGGCTGGATGGGCAGTGATTATGGATTTTTTTAATCCATTC TCTCAGATTTGGTATCATGCGTTATTTTATTTCGTAATTTATACCGCTTTAATTGTATTC TTTGCTTACTTTTATACAGCGATTCAGTTTAATCCTGCAGAATTGGCTGAGAATTTGAAA AAATACGGTGGATTCATTCCAGGAATTCGTCCGGGTTCTCACACAAAAGAATATATTGAA AAAGTGTTAAATAGAATCACTCTTCCCGGAGCTATGTTTCTTGCAGGTTTGGCATTAGCA CCTTATATTATTATAAAATTCTTAGATTTGAGC…
86	Ind9	L.interrogans	India	Unknown	CTTTCTATTCCTCAGATTTCTACAGGAGATATTTTACGCGAGGCAGTAAAGAATCAAACT GCGATGGGAATAGAAGCAAAACGTTATATGGATGCGGGAGACTTGGTTCCAGATTCCGTA GTGATTGGAATCATAAAAGATCGCATTCGAGAAGCGGATTGTAAAAATGGATTTTTGTTG GATGGATTTCCGAGAACCGTGGAACAAGCGGAAGCTTTAGATACACTTTTAAAAAATGAA GGCAAGTCTATTGATAAAGCGATTAATCTTCAGGTTCCGGATGCGGAACTCTTAAAGAGA TTACTCGGCCGTGCAGAAATAGAAGGTCGCGCGGACGATAACGAAGTGACGATTAAAAAT CGTCTCGATAATTATAATAAGAAGACCTTACCT…	TATCTCGATATAGAACTGGATTATTATGATTTAGGCGTGGAGTACAGGGACAAAACGGAT GATAAAGTAGCCGTGGATTCTGCTCACGCGATTCAAAAATATGGAGTAGGCGTAAAATGT GCGACGATTACTCCTAACCAAGATAGAGTTAAAGAATACAATCTCAAACAAGAATGGAAA TCTCCGAACGGAACCATTCGTTCTATTTTAGACGGAACCGTTTTTCGTAAACCGATCATC GTAAAAAATATTCCTCCTGCGGTTCGTTCTTGGAAAAAACCGATTACAGTAGGACGTCAC GCCTACGGAGATCTTTATAAGGACACAGAACTTTATATTCCCGAAGCCGGAAAGGTGGAA CTCGTTTATACCGGAAAGGACGGAAAAGAAAAA…	ATCTCCGTTGCACTCTTTGCAAGCATTACCGCTTGTGGTGCTTTCGGTGGTCTGCCAAGC CTAAAAAGCTCTTTTGTTCTGAGCGAGGACACAATCCCAGGGACAAACGAAACCGTAAAA ACGTTACTTCCCTACGGATCTGTGATCAACTATTACGGATACGTAAAGCCAGGACAAGCG CCGGACGGTTTAGTCGATGGAAACAAAAAAGCATACTATCTCTATGTTTGGATTCCTGCC GTAATCGCTGAAATGGGAGTTCGTATGATTTCCCCAACAGGCGAAATCGGTGAACCAGGC GACGGAGACTTAGTAAGCGACGCTTTCAAAGCGGCTACCCCAGAAGAAAAATCAATGCCA CATTGGTTTGATACTTGGATCCGTGTAGAAAGA…	GGAAATTGCGCAGCTACAGTCGATGTAGAATATCCGGTATTCCCGAAAGATAAAGAAGGC CGTGCACTTCAGAAATTCCTCGGAACCATTCGTAACGTAGGTTTGGCCGTTGAAGCTCCT AAAAAAAGTCTTTGGGAAGCAATTTTCGGTGAAGGTTCCAGCTTTATCGATCAGATGCCT TCTAAAGTTTTCGAGGCGTTTGACAAAGAATCTTATTACAAACTTACCGACCTAAGCAAA CGTGCAGACGCAATCAACGAAGCAAGTCTTTCTCTTACAGGAATCACTAAAAATAGAGCG AAGATCGGAAATCTGATTGGAGCGGAAGCAATTCTATACATAGGTTACCAAAAACCTTAT ACAGAGTGTAGTACTGAAAATAAAATCGATGCG…	CACGTGGGTAATCTTCCTCTGAGTCTGGGATAACTTTCCGAAAGGGAAGCTAATACTGGA TGGTCCCGAGAGATCATAAGATTTTTCGGGTAAAGATTTATTGCTCGGAGATGAGCCCGC GTCCGATTAGCTAGTTGGTGAGGTAAAGGCTCACCAAGGCGACGATCGGTAGCCGGCCTG AGAGGGTGTTCGGCCACAATGGAACTGAGACACGGTCCATACTCCTACGGGAGGCAGCAG TTAAGAATCTTGCTCAATGGGGGGAACCCTGAAGCAGCGACGCCGCGTGAACGATGAAGG TCTTCGGATTGTAAAGTTCAGTAAGCAGGGAAAAATAAGCAGCAATGTGATGATGGTACC TGCCTAAAGCACCGGCTAACTACGTGCCAGCAG…	ATGCCGATCATTTTTGCTTCGTCTTTGATTTTATTTCCTCAGACGATTATTCAATGGTTA TCTAATAGTAGTCAAGAATGGGCTGGATGGGCAGTGATTATGGATTTTTTTAATCCATTC TCTCAGATTTGGTATCATGCGTTATTTTATTTCGTAATTTATACCGCTTTAATTGTATTC TTTGCTTACTTTTATACAGCGATTCAGTTTAATCCTGCAGAATTGGCTGAGAATTTGAAA AAATACGGTGGATTCATTCCAGGAATTCGTCCGGGTTCTCACACAAAAGAATATATTGAA AAAGTGTTAAATAGAATCACTCTTCCCGGAGCTATGTTTCTTGCAGGTTTGGCATTAGCA CCTTATATTATTATAAAATTCTTAGATTTGAGC…
87	Ind10	L.interrogans	India	Unknown	CTTTCTATTCCTCAGATTTCTACAGGAGATATTTTACGCGAGGCAGTAAAGAATCAAACT GCGATGGGAATAGAAGCAAAACGTTATATGGATGCGGGAGACTTGGTTCCAGATTCCGTA GTGATTGGAATCATAAAAGATCGCATTCGAGAAGCGGATTGTAAAAATGGATTTTTGTTG GATGGATTTCCGAGAACCGTGGAACAAGCGGAAGCTTTAGATACACTTTTAAAAAATGAA GGCAAGTCTATTGATAAAGCGATTAATCTTCAGGTTCCGGATGCGGAACTCTTAAAGAGA TTACTCGGCCGTGCAGAAATAGAAGGTCGCGCGGACGATAACGAAGTGACGATTAAAAAT CGTCTCGATAATTATAATAAGAAGACCTTACCT…	TATCTCGATATAGAACTGGATTATTATGATTTAGGCGTGGAGTACAGGGACAAAACGGAT GATAAAGTAGCCGTGGATTCTGCTCACGCGATTCAAAAATATGGAGTAGGCGTAAAATGT GCGACGATTACTCCTAACCAAGATAGAGTTAAAGAATACAATCTCAAACAAGAATGGAAA TCTCCGAACGGAACCATTCGTTCTATTTTAGACGGAACCGTTTTTCGTAAACCGATCATC GTAAAAAATATTCCTCCTGCGGTTCGTTCTTGGAAAAAACCGATTACAGTAGGACGTCAC GCCTACGGAGATCTTTATAAGGACACAGAACTTTATATTCCCGAAGCCGGAAAGGTGGAA CTCGTTTATACCGGAAAGGACGGAAAAGAAAAA…	ATCTCCGTTGCACTCTTTGCAAGCATTACCGCTTGTGGTGCTTTCGGTGGTCTGCCAAGC CTAAAAAGCTCTTTTGTTCTGAGCGAGGACACAATCCCAGGGACAAACGAAACCGTAAAA ACGTTACTTCCCTACGGATCTGTGATCAACTATTACGGATACGTAAAGCCAGGACAAGCG CCGGACGGTTTAGTCGATGGAAACAAAAAAGCATACTATCTCTATGTTTGGATTCCTGCC GTAATCGCTGAAATGGGAGTTCGTATGATTTCCCCAACAGGCGAAATCGGTGAACCAGGC GACGGAGACTTAGTAAGCGACGCTTTCAAAGCGGCTACCCCAGAAGAAAAATCAATGCCA CATTGGTTTGATACTTGGATCCGTGTAGAAAGA…	GGAAATTGCGCAGCTACAGTCGATGTAGAATATCCGGTATTCCCGAAAGATAAAGAAGGC CGTGCACTTCAGAAATTCCTCGGAACCATTCGTAACGTAGGTTTGGCCGTTGAAGCTCCT AAAAAAAGTCTTTGGGAAGCAATTTTCGGTGAAGGTTCCAGCTTTATCGATCAGATGCCT TCTAAAGTTTTCGAGGCGTTTGACAAAGAATCTTATTACAAACTTACCGACCTAAGCAAA CGTGCAGACGCAATCAACGAAGCAAGTCTTTCTCTTACAGGAATCACTAAAAATAGAGCG AAGATCGGAAATCTGATTGGAGCGGAAGCAATTCTATACATAGGTTACCAAAAACCTTAT ACAGAGTGTAGTACTGAAAATAAAATCGATGCG…	CACGTGGGTAATCTTCCTCTGAGTCTGGGATAACTTTCCGAAAGGGAAGCTAATACTGGA TGGTCCCGAGAGATCATAAGATTTTTCGGGTAAAGATTTATTGCTCGGAGATGAGCCCGC GTCCGATTAGCTAGTTGGTGAGGTAAAGGCTCACCAAGGCGACGATCGGTAGCCGGCCTG AGAGGGTGTTCGGCCACAATGGAACTGAGACACGGTCCATACTCCTACGGGAGGCAGCAG TTAAGAATCTTGCTCAATGGGGGGAACCCTGAAGCAGCGACGCCGCGTGAACGATGAAGG TCTTCGGATTGTAAAGTTCAGTAAGCAGGGAAAAATAAGCAGCAATGTGATGATGGTACC TGCCTAAAGCACCGGCTAACTACGTGCCAGCAG…	ATGCCGATCATTTTTGCTTCGTCTTTGATTTTATTTCCTCAGACGATTATTCAATGGTTA TCTAATAGTAGTCAAGAATGGGCTGGATGGGCAGTGATTATGGATTTTTTTAATCCATTC TCTCAGATTTGGTATCATGCGTTATTTTATTTCGTAATTTATACCGCTTTAATTGTATTC TTTGCTTACTTTTATACAGCGATTCAGTTTAATCCTGCAGAATTGGCTGAGAATTTGAAA AAATACGGTGGATTCATTCCAGGAATTCGTCCGGGTTCTCACACAAAAGAATATATTGAA AAAGTGTTAAATAGAATCACTCTTCCCGGAGCTATGTTTCTTGCAGGTTTGGCATTAGCA CCTTATATTATTATAAAATTCTTAGATTTGAGC…
88	Ind11	L.interrogans	India	Unknown	CTTTCTATTCCTCAGATTTCTACAGGAGATATTTTACGCGAGGCAGTAAAGAATCAAACT GCGATGGGAATAGAAGCAAAACGTTATATGGATGCGGGAGACTTGGTTCCAGATTCCGTA GTGATTGGAATCATAAAAGATCGCATTCGAGAAGCGGATTGTAAAAATGGATTTTTGTTG GATGGATTTCCGAGAACCGTGGAACAAGCGGAAGCTTTAGATACACTTTTAAAAAATGAA GGCAAGTCTATTGATAAAGCGATTAATCTTCAGGTTCCGGATGCGGAACTCTTAAAGAGA TTACTCGGCCGTGCAGAAATAGAAGGTCGCGCGGACGATAACGAAGTGACGATTAAAAAT CGTCTCGATAATTATAATAAGAAGACCTTACCT…	TATCTCGATATAGAACTGGATTATTATGATTTAGGCGTGGAGTACAGGGACAAAACGGAT GATAAAGTAGCCGTGGATTCTGCTCACGCGATTCAAGAATATGGAGTAGGCGTAAAATGT GCGACGATTACTCCTAGCCAAGATAGAGTTAAAGAATACAATCTCAAACAAGAATGGAAA TCTCCGAACGGAACCATTCGTTCTATTTTAGACGGAAACGTTTTTCGTAAACCGATCATC GTAAAAAATATTCCTCCTGCGGTTCGTTCTTGGAAAAAACCGATTACAGTAGGACGTCAC GCCTACGGAGATCTTTATAAGGACACAGAACTTTATATTCCCGAAGCCGGAAAGGTGGAA CTCGTTTATACCGGAAAGGACGGAAAAGAAAAA…	ATCTCCGTTGCACTCTTTGCAAGCATTACCGCTTGTGGTGCTTTCGGTGGTCTGCCAAGC CTAAAAAGCTCTTTTGTTCTGAGCGAGGACACAATCCCAGGGACAAACGAAACCGTAAAA ACGTTACTTCCCTACGGATCTGTGATCAACTATTACGGATACGTAAAGCCAGGACAAGCG CCGGACGGTTTAGTCGATGGAAACAAAAAAGCATACTATCTCTATGTTTGGATTCCTGCC GTAATCGCTGAAATGGGAGTTCGTATGATTTCCCCAACAGGCGAAATCGGTGAACCAGGC GACGGAGACTTAGTAAGCGACGCTTTCAAAGCGGCTACCCCAGAAGAAAAATCAATGCCA CATTGGTTTGATACTTGGATCCGTGTAGAAAGA…	GGAAATTGCGCAGCTACAGTCGATGTAGAATATCCGGTATTCCCGAAAGATAAAGAAGGC CGTGCACTTCAGAAATTCCTCGGAACCATTCGTAACGTAGGTTTGGCCGTTGAAGCTCCT AAAAAAAGTCTTTGGGAAGCAATTTTCGGTGAAGGTTCCAGCTTTATCGATCAGATGCCT TCTAAAGTTTTCGAGGCGTTTGACAAAGAATCTTATTACAAACTTACCGACCTAAGCAAA CGTGCAGACGCAATCAACGAAGCAAGTCTTTCTCTTACAGGAATCACTAAAAATAGAGCG AAGATCGGAAATCTGATTGGAGCGGAAGCAATTCTATACATAGGTTACCAAAAACCTTAT ACAGAGTGTAGTACTGAAAATAAAATCGATGCG…	CACGTGGGTAATCTTCCTCTGAGTCTGGGATAACTTTCCGAAAGGGAAGCTAATACTGGA TGGTCCCGAGAGATCATAAGATTTTTCGGGTAAAGATTTATTGCTCGGAGATGAGCCCGC GTCCGATTAGCTAGTTGGTGAGGTAAAGGCTCACCAAGGCGACGATCGGTAGCCGGCCTG AGAGGGTGTTCGGCCACAATGGAACTGAGACACGGTCCATACTCCTACGGGAGGCAGCAG TTAAGAATCTTGCTCAATGGGGGGAACCCTGAAGCAGCGACGCCGCGTGAACGATGAAGG TCTTCGGATTGTAAAGTTCAGTAAGCAGGGAAAAATAAGCAGCAATGTGATGATGGTACC TGCCTAAAGCACCGGCTAACTACGTGCCAGCAG…	ATGCCGATCATTTTTGCTTCGTCTTTGATTTTATTTCCTCAGACGATTATTCAATGGTTA TCTAATAGTAGTCAAGAATGGGCTGGATGGGCAGTGATTATGGATTTTTTTAATCCATTC TCTCAGATTTGGTATCATGCGTTATTTTATTTCGTAATTTATACCGCTTTAATTGTATTC TTTGCTTACTTTTATACAGCGATTCAGTTTAATCCTGCAGAATTGGCTGAGAATTTGAAA AAATACGGTGGATTCATTCCAGGAATTCGTCCGGGTTCTCACACAAAAGAATATATTGAA AAAGTGTTAAATAGAATCACTCTTCCCGGAGCTATGTTTCTTGCAGGTTTGGCATTAGCA CCTTATATTATTATAAAATTCTTAGATTTGAGC…
89	Ind15	L.interrogans	India	Unknown	CTTTCTATTCCTCAGATTTCTACAGGAGATATTTTACGCGAGGCAGTAAAGAATCAAACT GCGATGGGAATAGAAGCAAAACGTTATATGGATGCGGGAGACTTGGTTCCAGATTCCGTA GTGATTGGAATCATAAAAGATCGCATTCGAGAAGCGGATTGTAAAAATGGATTTTTGTTG GATGGATTTCCGAGAACCGTGGAACAAGCGGAAGCTTTAGATACACTTTTAAAAAATGAA GGCAAGTCTATTGATAAAGCGATTAATCTTCAGGTTCCGGATGCGGAACTCTTAAAGAGA TTACTCGGCCGTGCAGAAATAGAAGGTCGCGCGGACGATAACGAAGTGACGATTAAAAAT CGTCTCGATAATTATAATAAGAAGACCTTACCT…	TATCTCGATATAGAACTGGATTATTATGATTTAGGCGTGGAGTACAGGGACAAAACGGAT GATAAAGTAGCCGTGGATTCTGCTCACGCGATTCAAAAATATGGAGTAGGCGTAAAATGT GCGACGATTACTCCTAACCAAGATAGAGTTAAAGAATACAATCTCAAACAAGAATGGAAA TCTCCGAACGGAACCATTCGTTCTATTTTAGACGGAACCGTTTTTCGTAAACCGATCATC GTAAAAAATATTCCTCCTGCGGTTCGTTCTTGGAAAAAACCGATTACAGTAGGACGTCAC GCTTACGGAGATCTTTATAAGGACACAGAACTTTATATTCCCGAAGCCGGAAAGGTGGAA CTCGTTTATACCGGAAAGGACGGAAAAGAAAAA…	ATCTCCGTTGCACTCTTTGCAAGCATTACCGCTTGTGGTGCTTTCGGTGGTCTGCCAAGC CTAAAAAGCTCTTTTGTTCTGAGCGAGGACACAATCCCAGGGACAAACGAAACCGTAAAA ACGTTACTTCCCTACGGATCTGTGATCAACTATTACGGATACGTAAAGCCAGGACAAGCG CCGGACGGTTTAGTCGATGGAAACAAAAAAGCATACTATCTCTATGTTTGGATTCCTGCC GTAATCGCTGAAATGGGAGTTCGTATGATTTCCCCAACAGGCGAAATCGGTGAACCAGGC GACGGAGACTTAGTAAGCGACGCTTTCAAAGCGGCTACCCCAGAAGAAAAATCAATGCCA CATTGGTTTGATACTTGGATCCGTGTAGAAAGA…	GGAAATTGCGCAGCTACAGTCGATGTAGAATATCCGGTATTCCCGAAAGATAAAGAAGGC CGTGCACTTCAGAAATTCCTCGGAACCATTCGTGACGTAGGTTTGGCCGTTGAAGCTCCT AAAAAAAGTCTTTGGGAAGCAATTTTCGGTGAAGGTTCCAGCTTTATCGATCAGATGCCT TCTAAAGTTTTCGAGGCGTTTGACAAAGAATCTTATTACAAACTTACCGACCTAAGCAAA CGTGCAGACGCAATCAACGAAGCAAGTCTTTCTCTTACAGGAATCACTAAAAATAGAGCG AAGATCGGAAATCTGATTGGAGCGGAAGCAATTCTATACATAGGTTACCAAAAACCTTAT ACAGAGTGTAGTACTGAAAATAAAATCGATGCG…	CACGTGGGTAATCTTCCTCTGAGTCTGGGATAACTTTCCGAAAGGGAAGCTAATACTGGA TGGTCCCGAGAGATCATAAGATTTTTCGGGTAAAGATTTATTGCTCGGAGATGAGCCCGC GTCCGATTAGCTAGTTGGTGAGGTAAAGGCTCACCAAGGCGACGATCGGTAGCCGGCCTG AGAGGGTGTTCGGCCACAATGGAACTGAGACACGGTCCATACTCCTACGGGAGGCAGCAG TTAAGAATCTTGCTCAATGGGGGGAACCCTGAAGCAGCGACGCCGCGTGAACGATGAAGG TCTTCGGATTGTAAAGTTCAGTAAGCAGGGAAAAATAAGCAGCAATGTGATGATGGTACC TGCCTAAAGCACCGGCTAACTACGTGCCAGCAG…	ATGCCGATCATTTTTGCTTCGTCTTTGATTTTATTCCCGCAGACGATTATTCAATGGTTA TCTAATAGTAGTCAAGAATGGGCTGGATGGGCAGTGATTATGGATTTTTTTAATCCATTC TCTCAGATTTGGTATCATGCGTTATTTTATTTCGTAATTTATACCGCTTTAATTGTATTC TTTGCTTACTTTTATACAGCGATTCAGTTTAATCCTGCAGAATTGGCTGAGAATTTGAAA AAATACGGTGGATTCATTCCAGGAATTCGTCCGGGTTCTCACACAAAAGAATATATTGAA AAAGTGTTAAATAGAATCACTCTTCCCGGAGCTATGTTTCTTGCAGGTTTGGCATTAGCA CCTTATATTATTATAAAATTCTTAGATTTGAGC…
90	Ind25	L.interrogans	India	Unknown	CTTTCTATCCCTCAGATTTCCACAGGCGATATTCTCCGCGAAGCGGTAAAGAATCAAACT GCGATGGGAATCGAAGCAAAACGTTATATGGATGCAGGTGATCTGGTACCTGATTCTGTT GTGATCGGAATCATCAAAGATCGTATCCGTGAAGCGGATTGCAGAAATGGGTTTTTATTG GATGGATTTCCAAGAACTGTAGAACAGGCGGAAGCTTTAGATACACTTTTAAAAAATGAA GGCAGGTCTATTGATAAAGCGATTAATCTTCAGGTTCCGGATGCGGAACTTTTAAAAAGA TTACTCGGCCGTGCAGAAATTGAAGGCCGCGCGGACGATAACGAAGTGACGATTAAAAAT CGTCTAGATAATTATAACAGGAAGACTTTACCT…	TATCTCGATATAGAACTGGACTATTATGATTTAGGTGTGGCATACAGGGACAAAACGGAT GATAAAGTTGCTGTGGATTCTGCTCACGCGATTCAAAAATACGGAGTAGGCGTAAAATGT GCGACGATTACTCCTAACCAAGATAGAGTTAAAGAATACAATCTCAAACAAGAATGGAAA TCTCCGAACGGAACCATTCGTTCTATCTTAGACGGAACCGTTTTTCGTAAACCGATCATC GTAAAAAACATTCCTCCTGCGGTTCGTTCTTGGAAAAAACCGATTACGGTAGGACGTCAC GCCTACGGAGATCTTTATAAGGACACAGAACTTTATATTCCCGAAGCCGGAAAAGTGGAA CTCGTTTATACCGGCAAGGACGGAAAAGAAAAA…	ATCTCCGTTGCACTCTTTGCAAGCATTACCGCTTGTGGTGCTTTCGGTGGTCTGCCAAGC CTAAAAAGCTCTTTTGTTCTGAGCGAGGACACAATCCCAGGGACAAACGAAACCGTAAAA ACGTTACTTCCCTACGGATCTGTGATCAACTATTACGGATACGTAAAGCCAGGACAAGCG CCGGACGGTTTAGTCGATGGAAACAAAAAAGCATACTATCTCTATGTTTGGATTCCTGCC GTAATCGCTGAAATGGGAGTTCGTATGATTTCCCCAACAGGCGAAATCGGTGAACCAGGC GATGGAGACTTAGTAAGCGACGCTTTCAAAGCGGCTACCCCAGAAGAAAAATCAATGCCA CATTGGTTTGATACTTGGATCCGTGTAGAAAGA…	GGAAATTGCGCAGCTACAGTCGATGTAGAATATCCGGTATTCCCGAAAGATAAAGAAGGC CGTGCACTTCAAAAATTCCTCGGAACCATTCGTAACGTAGGTTTGGCTGTAGAAGCTCCT AAAAAAAGTCTTTGGGAAGCGATCTTCGGTGAAGGTTCCAGTTTTATTGATCAGATGCCT TCTAAAGTTTTCGAGGCGTTTGACAAAGAGTCTTATTACAAACTTACCGACTTGAGCAAA CGTGCAGACGCAATCAACGAAGCGAGTCTTTCTCTTACAGGAATTACTAAAAACAGAGCA AAGATCGGAAATCTGATCGGAGCAGAAGCAATTCTATACATAGGTTATCAAAAACCTTAT ACAGAGTGTAGTACTGAAAATAAAGTCGATGCG…	CACGTGGGTAATCTTCCTCCGAGTCTGGGATAACTTTCCGAAAGGGAAGCTAATACTGGA TGGTCCCGAGAGATCATAAGATTTTTCGGGTAAAGATTTATTGCTCGGAGATGAGCCCGC GTCCGATTAGCTAGTTGGTGAGGTAAAGGCTCACCAAGGCGACGATCGGTAGCCGGCCTG AGAGGGTGTTCGGCCACAATGGAACTGAGACACGGTCCATACTCCTACGGGAGGCAGCAG TTAAGAATCTTGCTCAATGGGGGGAACCCTGAAGCAGCGACGCCGCGTGAACGATGAAGG TCTTCGGATTGTAAAGTTCAGTAAGCAGGGAAAAATAAGCAGCAATGTGATGATGGTACC TGCCTAAAGCACCGGCTAACTACGTGCCAGCAG…	ATGCCGATCATTTTTGCTTCGTCTTTGATTTTATTTCCGCAGACGATCATTCAATGGTTA TCCAATAGTAGTCAAGAATGGGCTGGATGGGCAGTGATTATGGATTTTTTCAATCCATTC TCTCAGATTTGGTACCACGCGTTGTTTTATTTCGTGATCTATACCGCTTTGATTATATTC TTTGCATACTTTTATACAGCGATTCAGTTTAATCCTGCGGAGTTGGCTGAGAATCTGAAA AAATACGGCGGGTTCATCCCAGGAATTCGCCCCGGTTCTCACACAAAAGAATACATCGAA AAAGTGTTAAATAGAATCACCCTTCCCGGAGCCATGTTTCTTGCCGGTTTGGCATTAGCA CCTTATATTATTATAAAATTCTTAGATTTGAGC…
91	VC1	L.interrogans	Andaman/India	Human clinical	CTTTCTATTCCTCAGATTTCTACAGGAGATATTTTACGCGAGGCAGTAAAGAATCAAACT GCGATGGGAATAGAAGCAAAACGTTATATGGATGCGGGAGACTTGGTTCCAGATTCCGTA GTGATTGGAATCATAAAAGATCGCATTCGAGAAGCGGATTGTAAAAATGGATTTTTGTTG GATGGATTTCCGAGAACCGTGGAACAAGCGGAAGCTTTAGATACACTTTTAAAAAATGAA GGCAAGTCTATTGATAAAGCGATTAATCTTCAGGTTCCGGATGCGGAACTCTTAAAGAGA TTACTCGGCCGTGCAGAAATAGAAGGTCGCGCGGACGATAACGAAGTGACGATTAAAAAT CGTCTCGATAATTATAATAAGAAGACCTTACCT…	TATCTCGATATAGAACTGGATTATTATGATTTAGGCGTGGAGTACAGGGACAAAACGGAT GATAAAGTAACCGTGGATTCTGCTCACGCGATTCAAAAATATGGAGTAGGCGTAAAATGT GCGACGATTACTCCTAACCAAGATAGAGTTAAAGAATACAATCTCAAACAAGAATGGAAA TCTCCGAACGGAACCATTCGTTCTATTTTAGACGGAACCGTTTTTCGTAAACCGATCATC GTAAAAAATATTCCTCCTGCGGTTCGTTCTTGGAAAAAACCGATTACAGTAGGACGTCAC GCTTACGGAGATCTTTATAAGGACACAGAACTTTATATTCCCGAAGCCGGAAAGGTGGAA CTCGTTTATACCGGAAAGGACGGAAAAGAAAAA…	ATCTCCGTTGCACTCTTTGCAAGCATTACCGCTTGTGGTGCTTTCGGTGGTCTGCCAAGC CTAAAAAGCTCTTTTGTTCTGAGCGAGGACACAATCCCAGGGACAAACGAAACCGTAAAA ACGTTACTTCCCTACGGATCTGTGATCAACTATTACGGATACGTAAAGCCAGGACAAGCG CCGGACGGTTTAGTCGATGGAAACAAAAAAGCATACTATCTCTATGTTTGGATTCCTGCC GTAATCGCTGAAATGGGAGTTCGTATGATTTCCCCAACAGGCGAAATCGGTGAACCAGGC GACGGAGACTTAGTAAGCGACGCTTTCAAAGCGGCTACCCCAGAAGAAAAATCAATGCCA CATTGGTTTGATACTTGGATCCGTGTAGAAAGA…	GGAAATTGCGCAGCTACAGTCGATGTAGAATATCCGGTATTCCCGAAAGATAAAGAAGGC CGTGCACTTCAGAAATTCCTCGGAACCATTCGTAACGTAGGTTTGGCCGTTGAAGCTCCT AAAAAAAGTCTTTGGGAAGCAATTTTCGGTGAAGGTTCCAGCTTTATCGATCAGATGCCT TCTAAAGTTTTCGAGGCGTTTGACAAAGAATCTTATTACAAACTTACCGACCTAAGCAAA CGTGCAGACGCAATCAACGAAGCAAGTCTTTCTCTTACAGGAATCACTAAAAATAGAGCG AAGATCGGAAATCTGATTGGAGCGGAAGCAATTCTATACATAGGTTACCAAAAACCTTAT ACAGAGTGTAGTACTGAAAATAAAATCGATGCG…	CACGTGGGTAATCTTCCTCTGAGTCTGGGATAACTTTCCGAAAGGGAAGCTAATACTGGA TGGTCCCGAGAGATCATAAGATTTTTCGGGTAAAGATTTATTGCTCGGAGATGAGCCCGC GTCCGATTAGCTAGTTGGTGAGGTAAAGGCTCACCAAGGCGACGATCGGTAGCCGGCCTG AGAGGGTGTTCGGCCACAATGGAACTGAGACACGGTCCATACTCCTACGGGAGGCAGCAG TTAAGAATCTTGCTCAATGGGGGGAACCCTGAAGCAGCGACGCCGCGTGAACGATGAAGG TCTTCGGATTGTAAAGTTCAATAAGCAGGGAAAAATAAGCAGCAATGTGATGATGGTACC TGCCTAAAGCACCGGCTAACTACGTGCCAGCAG…	ATGCCGATCATTTTTGCTTCGTCTTTGATTTTATTTCCTCAGACGATTATTCAATGGTTA TCTAATAGTAGTCAAGAATGGGCTGGATGGGCAGTGATTATGGATTTTTTTAATCCATTC TCTCAGATTTGGTATCATGCGTTATTTTATTTCGTAATTTATACCGCTTTAATTGTATTC TTTGCTTACTTTTATACAGCGATTCAGTTTAATCCTGCAGAATTGGCTGAGAATTTGAAA AAATACGGTGGATTCATTCCAGGAATTCGTCCGGGTTCTCACACAAAAGAATATATTGAA AAAGTGTTAAATAGAATCACTCTTCCCGGAGCTATGTTTCTTGCAGGTTTGGCATTAGCA CCTTATATTATTATAAAATTCTTAGATTTGAGC…
92	VC2	L.interrogans	Andaman/India	Human clinical	CTTTCTATTCCTCAGATTTCTACAGGAGATATTTTACGCGAGGCAGTAAAGAATCAAACT GCGATGGGAATAGAAGCAAAACGTTATATGGATGCGGGAGACTTGGTTCCAGATTCCGTA GTGATTGGAATCATAAAAGATCGCATTCGAGAAGCGGATTGTAAAAATGGATTTTTGTTG GATGGATTTCCGAGAACCGTGGAACAAGCGGAAGCTTTAGATACACTTTTAAAAAATGAA GGCAAGTCTATTGATAAAGCGATTAATCTTCAGGTTCCGGATGCGGAACTCTTAAAGAGA TTACTCGGCCGTGCAGAAATAGAAGGTCGCGCGGACGATAACGAAGTGACGATTAAAAAT CGTCTCGATAATTATAATAAGAAGACCTTACCT…	TATCTCGATATAGAACTGGATTATTATGATTTAGGCGTGGAGTACAGGGACAAAACGGAT GATAAAGTAACTGTGGATTCTGCTCACGCGATTCAAAAATATGGAGTAGGCGTAAAATGT GCGACGATTACTCCTAACCAAGATAGAGTTAAAGAATACAATCTCAAACAAGAATGGAAA TCTCCGAACGGAACCATTCGTTCTATTTTAGACGGAACCGTTTTTCGTAAACCGATCATC GTAAAAAATATTCCTCCTGCGGTTCGTTCTTGGAAAAAACCGATTACAGTAGGACGTCAC GCTTACGGAGATCTTTATAAGGACACAGAACTTTATATTCCCGAAGCCGGAAAGGTGGAA CTCGTTTATACCGGAAAGGACGGAAAAGAAAAA…	ATCTCCGTTGCACTCTTTGCAAGCATTACCGCTTGTGGTGCTTTCGGTGGTCTGCCAAGC CTAAAAAGCTCTTTTGTTCTGAGCGAGGACACAATCCCAGGGACAAACGAAACCGTAAAA ACGTTACTTCCCTACGGATCTGTGATCAACTATTACGGATACGTAAAGCCAGGACAAGCG CCGGACGGTTTAGTCGATGGAAACAAAAAAGCATACTATCTCTATGTTTGGATTCCTGCC GTAATCGCTGAAATGGGAGTTCGTATGATTTCCCCAACAGGCGAAATCGGTGAGCCAGGC GACGGAGACTTAGTAAGCGACGCTTTCAAAGCGGCTACCCCAGAAGAAAAATCAATGCCA CATTGGTTTGATACTTGGATCCGTGTAGAAAGA…	GGAAATTGCGCAGCTACAGTCGATGTAGAATATCCGGTATTCCCGAAAGATAAAGAAGGC CGTGCACTTCAGAAATTCCTCGGAACCATTCGTAACGTAGGTTTGGCTGTTGAAGCTCCT AAAAAAAGTCTTTGGGAAGCAATTTTCGGTGAAGGTTCCAGCTTTATCGATCAGATGCCT TCTAAAGTTTTCGAGGCGTTTGACAAAGAATCTTATTACAAACTTACCGACCTGAGTAAA CGTGCAGACGCAATCAACGAAGCAAGTCTTTCTCTTACAGGAATCACTAAAAATAGAGCG AAGATCGGAAATCTGATTGGAGCGGAAGCAATTCTATACATAGGTTACCAAAAACCTTAT ACAGAGTGTAGTACTGAAAATAAAATCGATGCA…	CACGTGGGTAATCTTCCTCTGAGTCTGGGATAACTTTCCGAAAGGGAAGCTAATACTGGA TGGTCCCGAGAGATCATAAGATTTTTCGGGTAAAGATTTATTGCTCGGAGATGAGCCCGC GTCCGATTAGCTAGTTGGTGAGGTAAAGGCTCACCAAGGCGACGATCGGTAGCCGGCCTG AGAGGGTGTTCGGCCACAATGGAACTGAGACACGGTCCATACTCCTACGGGAGGCAGCAG TTAAGAATCTTGCTCAATGGGGGGAACCCTGAAGCAGCGACGCCGCGTGAACGATGAAGG TCTTCGGATTGTAAAGTTCAATAAGCAGGGAAAAATAAGCAGCAATGTGATGATGGTACC TGCCTAAAGCACCGGCTAACTACGTGCCAGCAG…	ATGCCGATCATTTTTGCTTCGTCTTTGATTTTATTTCCTCAGACGATTATTCAATGGTTA TCTAATAGTAGTCAAGAATGGGCTGGATGGGCAGTGATTATGGATTTTTTTAATCCATTC TCTCAGATTTGGTATCATGCGTTATTTTATTTCGTAATTTATACCGCTTTAATTGTATTC TTTGCTTACTTTTATACAGCGATTCAGTTTAATCCTGCAGAATTGGCTGAGAATTTGAAA AAATACGGTGGGTTCATTCCAGGAATTCGTCCGGGTTCTCACACAAAAGAATACATTGAA AAAGTGTTAAATAGAATCACTCTTCCCGGAGCTATGTTTCTTGCAGGTTTGGCATTAGCA CCTTATATTATTATAAAATTCTTAGATTTGAGC…
93	VC3	L.interrogans	Andaman/India	Human clinical	CTTTCTATTCCTCAGATTTCTACAGGAGATATTTTACGCGAGGCAGTAAAGAATCAAACT GCGATGGGAATAGAAGCAAAACGTTATATGGATGCGGGAGACTTGGTTCCAGATTCCGTA GTGATTGGAATCATAAAAGATCGCATTCGAGAAGCGGATTGTAAAAATGGATTTTTGTTG GATGGATTTCCGAGAACCGTGGAACAAGCGGAAGCTTTAGATACACTTTTAAAAAATGAA GGCAAGTCTATTGATAAAGCGATTAATCTTCAGGTTCCGGATGCGGAACTCTTAAAGAGA TTACTCGGCCGTGCAGAAATAGAAGGTCGCGCGGACGATAACGAAGTGACGATTAAAAAT CGTCTCGATAATTATAATAAGAAGACCTTACCT…	TATCTCGATATAGAACTGGATTATTATGATTTAGGCGTGGAGTACAGGGACAAAACGGAT GATAAAGTAACCGTGGATTCTGCTCACGCGATTCAAAAATATGGAGTAGGCGTAAAATGT GCGACGATTACTCCTAACCAAGATAGAGTTAAAGAATACAATCTCAAACAAGAATGGAAA TCTCCGAACGGAACCATTCGTTCTATTTTAGACGGAACCGTTTTTCGTAAACCGATCATC GTAAAAAATATTCCTCCTGCGGTTCGTTCTTGGAAAAAACCGATTACAGTAGGACGTCAC GCTTACGGAGATCTTTATAAGGACACAGAACTTTATATTCCCGAAGCCGGAAAGGTGGAA CTCGTTTATACCGGAAAGGACGGAAAAGAAAAA…	ATCTCCGTTGCACTCTTTGCAAGCATTACCGCTTGTGGTGCTTTCGGTGGTCTGCCAAGC CTAAAAAGCTCTTTTGTTCTGAGCGAGGACACAATCCCAGGGACAAACGAAACCGTAAAA ACGTTACTTCCCTACGGATCTGTGATCAACTATTACGGATACGTAAAGCCAGGACAAGCG CCGGACGGTTTAGTCGATGGAAACAAAAAAGCATACTATCTCTATGTTTGGATTCCTGCC GTAATCGCTGAAATGGGAGTTCGTATGATTTCCCCAACAGGCGAAATCGGTGAACCAGGC GACGGAGACTTAGTAAGCGACGCTTTCAAAGCGGCTACCCCAGAAGAAAAATCAATGCCA CATTGGTTTGATACTTGGATCCGTGTAGAAAGA…	GGAAATTGCGCAGCTACAGTCGATGTAGAATATCCGGTATTCCCGAAAGATAAAGAAGGC CGTGCACTTCAGAAATTCCTCGGAACCATTCGTAACGTAGGTTTGGCCGTTGAAGCTCCT AAAAAAAGTCTTTGGGAAGCAATTTTCGGTGAAGGTTCCAGCTTTATCGATCAGATGCCT TCTAAAGTTTTCGAGGCGTTTGACAAAGAATCTTATTACAAACTTACCGACCTAAGCAAA CGTGCAGACGCAATCAACGAAGCAAGTCTTTCTCTTACAGGAATCACTAAAAATAGAGCG AAGATCGGAAATCTGATTGGAGCGGAAGCAATTCTATACATAGGTTACCAAAAACCTTAT ACAGAGTGTAGTACTGAAAATAAAATCGATGCG…	CACGTGGGTAATCTTCCTCTGAGTCTGGGATAACTTTCCGAAAGGGGAGCTAATACTGGA TAGTCCCGATAGATCATAGGATGTATCGGGTAAAGATTCATTGCTCGGAGATGAGCCCGC GTCCGATTAGCTAGTTGGTGAGGTAAAGGCTCACCAAGGCGACGATCGGTAGCCGGCCTG AGAGGGTGTTCGGCCACAATGGAACTGAGACACGGTCCATACTCCTACGGGAGGCAGCAG TTAAGAATCTTGCTCAATGGGGGGAACCCTGAAGCAGCGACGCCGCGTGAACGATGAAGG TCTTCGGATTGTAAAGTTCAATAAGCAGGGAAAAATAAGCAGCGATGTGATGATGGTACC TGCCTAAAGCACCGGCTAACTACGTGCCAGCAG…	ATGCCGATCATTTTTGCTTCGTCTTTGATTTTATTTCCTCAGACGATTATTCAATGGTTA TCTAATAGTAGTCAAGAATGGGCTGGATGGGCAGTGATTATGGATTTTTTTAATCCATTC TCTCAGATTTGGTATCATGCGTTATTTTATTTCGTAATTTATACCGCTTTAATTGTATTC TTTGCTTACTTTTATACAGCGATTCAGTTTAATCCTGCAGAATTGGCTGAGAATTTGAAA AAATACGGTGGATTCATTCCAGGAATTCGTCCGGGTTCTCACACAAAAGAATATATTGAA AAAGTGTTAAATAGAATCACTCTTCCCGGAGCTATGTTTCTTGCAGGTTTGGCATTAGCA CCTTATATTATTATAAAATTCTTAGATTTGAGC…
94	VC4	L.interrogans	Andaman/India	Human clinical	CTTTCTATTCCTCAGATTTCTACAGGAGATATTTTACGCGAGGCAGTAAAGAATCAAACT GCGATGGGAATAGAAGCAAAACGTTATATGGATGCGGGAGACTTGGTTCCAGATTCCGTA GTGATTGGAATCATAAAAGATCGCATTCGAGAAGCGGATTGTAAAAATGGATTTTTGTTG GATGGATTTCCGAGAACCGTGGAACAAGCGGAAGCTTTAGATACACTTTTAAAAAATGAA GGCAAGTCTATTGATAAAGCGATTAATCTTCAGGTTCCGGATGCGGAACTCTTAAAGAGA TTACTCGGCCGTGCAGAAATAGAAGGTCGCGCGGACGATAACGAAGTGACGATTAAAAAT CGTCTCGATAATTATAATAAGAAGACCTTACCT…	TATCTCGATATAGAACTGGATTATTATGATTTAGGCGTGGAGTACAGGGACAAAACGGAT GATAAAGTAACCGTGGATTCTGCTCACGCGATTCAAAAATATGGAGTAGGCGTAAAATGT GCGACGATTACTCCTAACCAAGATAGAGTTAAAGAATACAATCTCAAACAAGAATGGAAA TCTCCGAACGGAACCATTCGTTCTATTTTAGACGGAACCGTTTTTCGTAAACCGATCATC GTAAAAAATATTCCTCCTGCGGTTCGTTCTTGGAAAAAACCGATTACAGTAGGACGTCAC GCTTACGGAGATCTTTATAAGGACACAGAACTTTATATTCCCGAAGCCGGAAAGGTGGAA CTCGTTTATACCGGAAAGGACGGAAAAGAAAAA…	ATCTCCGTTGCACTCTTTGCAAGCATTACCGCTTGTGGTGCTTTCGGTGGTCTGCCAAGC CTAAAAAGCTCTTTTGTTCTGAGCGAGGACACAATCCCAGGGACAAACGAAACCGTAAAA ACGTTACTTCCCTACGGATCTGTGATCAACTATTACGGATACGTAAAGCCAGGACAAGCG CCGGACGGTTTAGTCGATGGAAACAAAAAAGCATACTATCTCTATGTTTGGATTCCTGCC GTAATCGCTGAAATGGGAGTTCGTATGATTTCCCCAACAGGCGAAATCGGTGAACCAGGC GACGGAGACTTAGTAAGCGACGCTTTCAAAGCGGCTACCCCAGAAGAAAAATCAATGCCA CATTGGTTTGATACTTGGATCCGTGTAGAAAGA…	GGAAATTGCGCAGCTACAGTCGATGTAGAATATCCGGTATTCCCGAAAGATAAAGAAGGC CGTGCACTTCAGAAATTCCTCGGAACCATTCGTAACGTAGGTTTGGCCGTTGAAGCTCCT AAAAAAAGTCTTTGGGAAGCAATTTTCGGTGAAGGTTCCAGCTTTATCGATCAGATGCCT TCTAAAGTTTTCGAGGCGTTTGACAAAGAATCTTATTACAAACTTACCGACCTAAGCAAA CGTGCAGACGCAATCAACGAAGCAAGTCTTTCTCTTACAGGAATCACTAAAAATAGAGCG AAGATCGGAAATCTGATTGGAGCGGAAGCAATTCTATACATAGGTTACCAAAAACCTTAT ACAGAGTGTAGTACTGAAAATAAAATCGATGCG…	CACGTGGGTAATCTTCCTTCGAGTCTGGGATAACTTTCCGAAAGGGGAGCTAATACTGGA TAGTCCCGATAGATCATAGGATGTATCGGGTAAAGATTCATTGCTCGGAGATGAGCCCGC GTCCGATTAGCTAGTTGGTGAGGTAAAGGCTCACCAAGGCGACGATCGGTAGCCGGCCTG AGAGGGTGTTCGGCCACAATGGAACTGAGACACGGTCCATACTCCTACGGGAGGCAGCAG TTAAGAATCTTGCTCAATGGGGGGAACCCTGAAGCAGCGACGCCGCGTGAACGATGAAGG TCTTCGGATTGTAAAGTTCAATAAGCAGGGAAAAATAAGCAGCGATGTGATGATGGTACC TGCCTAAAGCACCGGCTAACTACGTGCCAGCAG…	ATGCCGATCATTTTTGCTTCGTCTTTGATTTTATTTCCTCAGACGATTATTCAATGGTTA TCTAATAGTAGTCAAGAATGGGCTGGATGGGCAGTGATTATGGATTTTTTTAATCCATTC TCTCAGATTTGGTATCATGCGTTATTTTATTTCGTAATTTATACCGCTTTAATTGTATTC TTTGCTTACTTTTATACAGCGATTCAGTTTAATCCTGCAGAATTGGCTGAGAATTTGAAA AAATACGGTGGATTCATTCCAGGAATTCGTCCGGGTTCTCACACAAAAGAATATATTGAA AAAGTGTTAAATAGAATCACTCTTCCCGGAGCTATGTTTCTTGCAGGTTTGGCATTAGCA CCTTATATTATTATAAAATTCTTAGATTTGAGC…
95	VC5	L.interrogans	Andaman/India	Human clinical	CTTTCTATTCCTCAGATTTCTACAGGAGATATTTTACGCGAGGCAGTAAAGAATCAAACT GCGATGGGAATAGAAGCAAAACGTTATATGGATGCGGGAGACTTGGTTCCAGATTCCGTA GTGATTGGAATCATAAAAGATCGCATTCGAGAAGCGGATTGTAAAAATGGATTTTTGTTG GATGGATTTCCGAGAACCGTGGAACAAGCGGAAGCTTTAGATACACTTTTAAAAAATGAA GGCAAGTCTATTGATAAAGCGATTAATCTTCAGGTTCCGGATGCGGAACTCTTAAAGAGA TTACTCGGCCGTGCAGAAATAGAAGGTCGCGCGGACGATAACGAAGTGACGATTAAAAAT CGTCTCGATAATTATAATAAGAAGACCTTACCT…	TATCTCGATATAGAACTGGATTATTATGATTTAGGCGTGGAGTACAGGGACAAAACGGAT GATAAAGTAACCGTGGATTCTGCTCACGCGATTCAAAAATATGGAGTAGGCGTAAAATGT GCGACGATTACTCCTAACCAAGATAGAGTTAAAGAATACAATCTCAAACAAGAATGGAAA TCTCCGAACGGAACCATTCGTTCTATTTTAGACGGAACCGTTTTTCGTAAACCGATCATC GTAAAAAATATTCCTCCTGCGGTTCGTTCTTGGAAAAAACCGATTACAGTAGGACGTCAC GCTTACGGAGATCTTTATAAGGACACAGAACTTTATATTCCCGAAGCCGGAAAGGTGGAA CTCGTTTATACCGGAAAGGACGGAAAAGAAAAA…	ATCTCCGTTGCACTCTTTGCAAGCATTACCGCTTGTGGTGCTTTCGGTGGTCTGCCAAGC CTAAAAAGCTCTTTTGTTCTGAGCGAGGACACAATCCCAGGGACAAACGAAACCGTAAAA ACGTTACTTCCCTACGGATCTGTGATCAACTATTACGGATACGTAAAGCCAGGACAAGCG CCGGACGGTTTAGTCGATGGAAACAAAAAAGCATACTATCTCTATGTTTGGATTCCTGCC GTAATCGCTGAAATGGGAGTTCGTATGATTTCCCCAACAGGCGAAATCGGTGAACCAGGC GACGGAGACTTAGTAAGCGACGCTTTCAAAGCGGCTACCCCAGAAGAAAAATCAATGCCA CATTGGTTTGATACTTGGATCCGTGTAGAAAGA…	GGAAATTGCGCAGCTACAGTCGATGTAGAATATCCGGTATTCCCGAAAGATAAAGAAGGC CGTGCACTTCAGAAATTCCTCGGAACCATTCGTAACGTAGGTTTGGCCGTTGAAGCTCCT AAAAAAAGTCTTTGGGAAGCAATTTTCGGTGAAGGTTCCAGCTTTATCGATCAGATGCCT TCTAAAGTTTTCGAGGCGTTTGACAAAGAATCTTATTACAAACTTACCGACCTAAGCAAA CGTGCAGACGCAATCAACGAAGCAAGTCTTTCTCTTACAGGAATCACTAAAAATAGAGCG AAGATCGGAAATCTGATTGGAGCGGAAGCAATTCTATACATAGGTTACCAAAAACCTTAT ACAGAGTGTAGTACTGAAAATAAAATCGATGCG…	CACGTGGGTAATCTTCCTCCGAGTCTGGGATAACTTTCCGAAAGGGGAGCTAATACTGGA TAGTCCCGATAGATCATAGGATGTATCGGGTAAAGATTCATTGCTCGGAGATGAGCCCGC GTCCGATTAGCTAGTTGGTGAGGTAAAGGCTCACCAAGGCGACGATCGGTAGCCGGCCTG AGAGGGTGTTCGGCCACAATGGAACTGAGACACGGTCCATACTCCTACGGGAGGCAGCAG TTAAGAATCTTGCTCAATGGGGGGAACCCTGAAGCAGCGACGCCGCGTGAACGATGAAGG TCTTCGGATTGTAAAGTTCAATAAGCAGGGAAAAATAAGCAGCGATGTGATGATGGTACC TGCCTAAAGCACCGGCTAACTACGTGCCAGCAG…	ATGCCGATCATTTTTGCTTCGTCTTTGATTTTATTTCCTCAGACGATTATTCAATGGTTA TCTAATAGTAGTCAAGAATGGGCTGGATGGGCAGTGATTATGGATTTTTTTAATCCATTC TCTCAGATTTGGTATCATGCGTTATTTTATTTCGTAATTTATACCGCTTTAATTGTATTC TTTGCTTACTTTTATACAGCGATTCAGTTTAATCCTGCAGAATTGGCTGAGAATTTGAAA AAATACGGTGGATTCATTCCAGGAATTCGTCCGGGTTCTCACACAAAAGAATATATTGAA AAAGTGTTAAATAGAATCACTCTTCCCGGAGCTATGTTTCTTGCAGGTTTGGCATTAGCA CCTTATATTATTATAAAATTCTTAGATTTGAGC…
96	VC6	L.interrogans	Andaman/India	Human clinical	CTTTCTATTCCTCAGATTTCTACAGGAGATATTTTACGCGAGGCAGTAAAGAATCAAACT GCGATGGGAATAGAAGCAAAACGTTATATGGATGCGGGAGACTTGGTTCCAGATTCCGTA GTGATTGGAATCATAAAAGATCGCATTCGAGAAGCGGATTGTAAAAATGGATTTTTGTTG GATGGATTTCCGAGAACCGTGGAACAAGCGGAAGCTTTAGATACACTTTTAAAAAATGAA GGCAAGTCTATTGATAAAGCGATTAATCTTCAGGTTCCGGATGCGGAACTCTTAAAGAGA TTACTCGGCCGTGCAGAAATAGAAGGTCGCGCGGACGATAACGAAGTGACGATTAAAAAT CGTCTCGATAATTATAATAAGAAGACCTTACCT…	TATCTCGATATAGAACTGGATTATTATGATTTAGGCGTGGAGTACAGGGACAAAACGGAT GATAAAGTAACTGTGGATTCTGCTCACGCGATTCAAAAATATGGAGTAGGCGTAAAATGT GCGACGATTACTCCTAACCAAGATAGAGTTAAAGAATACAATCTCAAACAAGAATGGAAA TCTCCGAACGGAACCATTCGTTCTATTTTAGACGGAACCGTTTTTCGTAAACCGATCATC GTAAAAAATATTCCTCCTGCGGTTCGTTCTTGGAAAAAACCGATTACAGTAGGACGTCAC GCTTACGGAGATCTTTATAAGGACACAGAACTTTATATTCCCGAAGCCGGAAAGGTGGAA CTCGTTTATACCGGAAAGGACGGAAAAGAAAAA…	ATCTCCGTTGCACTCTTTGCAAGCATTACCGCTTGTGGTGCTTTCGGTGGTCTGCCAAGC CTAAAAAGCTCTTTTGTTCTGAGCGAGGACACAATCCCAGGGACAAACGAAACCGTAAAA ACGTTACTTCCCTACGGATCTGTGATCAACTATTACGGATACGTAAAGCCAGGACAAGCG CCGGACGGTTTAGTCGATGGAAACAAAAAAGCATACTATCTCTATGTTTGGATTCCTGCC GTAATCGCTGAAATGGGAGTTCGTATGATTTCCCCAACAGGCGAAATCGGTGAGCCAGGC GACGGAGACTTAGTAAGCGACGCTTTCAAAGCGGCTACCCCAGAAGAAAAATCAATGCCA CATTGGTTTGATACTTGGATCCGTGTAGAAAGA…	GGAAATTGCGCAGCTACAGTCGATGTAGAATATCCGGTATTCCCGAAAGATAAAGAAGGC CGTGCACTTCAGAAATTCCTCGGAACCATTCGTAACGTAGGTTTGGCTGTTGAAGCTCCT AAAAAAAGTCTTTGGGAAGCAATTTTCGGTGAAGGTTCCAGCTTTATCGATCAGATGCCT TCTAAAGTTTTCGAGGCGTTTGACAAAGAATCTTATTACAAACTTACCGACCTGAGTAAA CGTGCAGACGCAATCAACGAAGCAAGTCTTTCTCTTACAGGAATCACTAAAAATAGAGCG AAGATCGGAAATCTGATTGGAGCGGAAGCAATTCTATACATAGGTTACCAAAAACCTTAT ACAGAGTGTAGTACTGAAAATAAAATCGATGCA…	CACGTGGGTAATCTTCCTCCGAGTCTGGGATAACTTTCCGAAAGGGGAGCTAATACTGGA TAGTCCCGATAGATCATAGGATGTATCGGGTAAAGATTCATTGCTCGGAGATGAGCCCGC GTCCGATTAGCTAGTTGGTGAGGTAAAGGCTCACCAAGGCGACGATCGGTAGCCGGCCTG AGAGGGTGTTCGGCCACAATGGAACTGAGACACGGTCCATACTCCTACGGGAGGCAGCAG TTAAGAATCTTGCTCAATGGGGGGAACCCTGAAGCAGCGACGCCGCGTGAACGATGAAGG TCTTCGGATTGTAAAGTTCAATAAGCAGGGAAAAATAAGCAGCGATGTGATGATGGTACC TGCCTAAAGCACCGGCTAACTACGTGCCAGCAG…	ATGCCGATCATTTTTGCTTCGTCTTTGATTTTATTTCCTCAGACGATTATTCAATGGTTA TCTAATAGTAGTCAAGAATGGGCTGGATGGGCAGTGATTATGGATTTTTTTAATCCATTC TCTCAGATTTGGTATCATGCGTTATTTTATTTCGTAATTTATACCGCTTTAATTGTATTC TTTGCTTACTTTTATACAGCGATTCAGTTTAATCCTGCAGAATTGGCTGAGAATTTGAAA AAATACGGTGGGTTCATTCCAGGAATTCGTCCGGGTTCTCACACAAAAGAATACATTGAA AAAGTGTTAAATAGAATCACTCTTCCCGGAGCTATGTTTCTTGCAGGTTTGGCATTAGCA CCTTATATTATTATAAAATTCTTAGATTTGAGC…
97	VC7	L.interrogans	Andaman/India	Human clinical	CTTTCTATTCCTCAGATTTCTACAGGAGATATTTTACGCGAGGCAGTAAAGAATCAAACT GCGATGGGAATAGAAGCAAAACGTTATATGGATGCGGGAGACTTGGTTCCAGATTCCGTA GTGATTGGAATCATAAAAGATCGCATTCGAGAAGCGGATTGTAAAAATGGATTTTTGTTG GATGGATTTCCGAGAACCGTGGAACAAGCGGAAGCTTTAGATACACTTTTAAAAAATGAA GGCAAGTCTATTGATAAAGCGATTAATCTTCAGGTTCCGGATGCGGAACTCTTAAAGAGA TTACTCGGCCGTGCAGAAATAGAAGGTCGCGCGGACGATAACGAAGTGACGATTAAAAAT CGTCTCGATAATTATAATAAGAAGACCTTACCT…	TATCTCGATATAGAACTGGATTATTATGATTTAGGCGTGGAGTACAGGGACAAAACGGAT GATAAAGTAACCGTGGATTCTGCTCACGCGATTCAAAAATATGGAGTAGGCGTAAAATGT GCGACGATTACTCCTAACCAAGATAGAGTTAAAGAATACAATCTCAAACAAGAATGGAAA TCTCCGAACGGAACCATTCGTTCTATTTTAGACGGAACCGTTTTTCGTAAACCGATCATC GTAAAAAATATTCCTCCTGCGGTTCGTTCTTGGAAAAAACCGATTACAGTAGGACGTCAC GCTTACGGAGATCTTTATAAGGACACAGAACTTTATATTCCCGAAGCCGGAAAGGTGGAA CTCGTTTATACCGGAAAGGACGGAAAAGAAAAA…	ATCTCCGTTGCACTCTTTGCAAGCATTACCGCTTGTGGTGCTTTCGGTGGTCTGCCAAGC CTAAAAAGCTCTTTTGTTCTGAGCGAGGACACAATCCCAGGGACAAACGAAACCGTAAAA ACGTTACTTCCCTACGGATCTGTGATCAACTATTACGGATACGTAAAGCCAGGACAAGCG CCGGACGGTTTAGTCGATGGAAACAAAAAAGCATACTATCTCTATGTTTGGATTCCTGCC GTAATCGCTGAAATGGGAGTTCGTATGATTTCCCCAACAGGCGAAATCGGTGAACCAGGC GACGGAGACTTAGTAAGCGACGCTTTCAAAGCGGCTACCCCAGAAGAAAAATCAATGCCA CATTGGTTTGATACTTGGATCCGTGTAGAAAGA…	GGAAATTGCGCAGCTACAGTCGATGTAGAATATCCGGTATTCCCGAAAGATAAAGAAGGC CGTGCACTTCAGAAATTCCTCGGAACCATTCGTAACGTAGGTTTGGCCGTTGAAGCTCCT AAAAAAAGTCTTTGGGAAGCAATTTTCGGTGAAGGTTCCAGCTTTATCGATCAGATGCCT TCTAAAGTTTTCGAGGCGTTTGACAAAGAATCTTATTACAAACTTACCGACCTAAGCAAA CGTGCAGACGCAATCAACGAAGCAAGTCTTTCTCTTACAGGAATCACTAAAAATAGAGCG AAGATCGGAAATCTGATTGGAGCGGAAGCAATTCTATACATAGGTTACCAAAAACCTTAT ACAGAGTGTAGTACTGAAAATAAAATCGATGCG…	CACGTGGGTAATCTTCCTCCGAGTCTGGGATAACTTTCCGAAAGGGGAGCTAATACTGGA TAGTCCCGATAGATCATAGGATGTATCGGGTAAAGATTCATTGCTCGGAGATGAGCCCGC GTCCGATTAGCTAGTTGGTGAGGTAAAGGCTCACCAAGGCGACGATCGGTAGCCGGCCTG AGAGGGTGTTCGGCCACAATGGAACTGAGACACGGTCCATACTCCTACGGGAGGCAGCAG TTAAGAATCTTGCTCAATGGGGGGAACCCTGAAGCAGCGACGCCGCGTGAACGATGAAGG TCTTCGGATTGTAAAGTTCAATAAGCAGGGAAAAATAAGCAGCGATGTGATGATGGTACC TGCCTAAAGCACCGGCTAACTACGTGCCAGCAG…	ATGCCGATCATTTTTGCTTCGTCTTTGATTTTATTTCCTCAGACGATTATTCAATGGTTA TCTAATAGTAGTCAAGAATGGGCTGGATGGGCAGTGATTATGGATTTTTTTAATCCATTC TCTCAGATTTGGTATCATGCGTTATTTTATTTCGTAATTTATACCGCTTTAATTGTATTC TTTGCTTACTTTTATACAGCGATTCAGTTTAATCCTGCAGAATTGGCTGAGAATTTGAAA AAATACGGTGGATTCATTCCAGGAATTCGTCCGGGTTCTCACACAAAAGAATATATTGAA AAAGTGTTAAATAGAATCACTCTTCCCGGAGCTATGTTTCTTGCAGGTTTGGCATTAGCA CCTTATATTATTATAAAATTCTTAGATTTGAGC…
98	VC8	L.interrogans	Andaman/India	Human clinical	CTTTCTATTCCTCAGATTTCTACAGGAGATATTTTACGCGAGGCAGTAAAGAATCAAACT GCGATGGGAATAGAAGCAAAACGTTATATGGATGCGGGAGACTTGGTTCCAGATTCCGTA GTGATTGGAATCATAAAAGATCGCATTCGAGAAGCGGATTGTAAAAATGGATTTTTGTTG GATGGATTTCCGAGAACCGTGGAACAAGCGGAAGCTTTAGATACACTTTTAAAAAATGAA GGCAAGTCTATTGATAAAGCGATTAATCTTCAGGTTCCGGATGCGGAACTCTTAAAGAGA TTACTCGGCCGTGCAGAAATAGAAGGTCGCGCGGACGATAACGAAGTGACGATTAAAAAT CGTCTCGATAATTATAATAAGAAGACCTTACCT…	TATCTCGATATAGAACTGGATTATTATGATTTAGGCGTGGAGTACAGGGACAAAACGGAT GATAAAGTAACCGTGGATTCTGCTCACGCGATTCAAAAATATGGAGTAGGCGTAAAATGT GCGACGATTACTCCTAACCAAGATAGAGTTAAAGAATACAATCTCAAACAAGAATGGAAA TCTCCGAACGGAACCATTCGTTCTATTTTAGACGGAACCGTTTTTCGTAAACCGATCATC GTAAAAAATATTCCTCCTGCGGTTCGTTCTTGGAAAAAACCGATTACAGTAGGACGTCAC GCTTACGGAGATCTTTATAAGGACACAGAACTTTATATTCCCGAAGCCGGAAAGGTGGAA CTCGTTTATACCGGAAAGGACGGAAAAGAAAAA…	ATCTCCGTTGCACTCTTTGCAAGCATTACCGCTTGTGGTGCTTTCGGTGGTCTGCCAAGC CTAAAAAGCTCTTTTGTTCTGAGCGAGGACACAATCCCAGGGACAAACGAAACCGTAAAA ACGTTACTTCCCTACGGATCTGTGATCAACTATTACGGATACGTAAAGCCAGGACAAGCG CCGGACGGTTTAGTCGATGGAAACAAAAAAGCATACTATCTCTATGTTTGGATTCCTGCC GTAATCGCTGAAATGGGAGTTCGTATGATTTCCCCAACAGGCGAAATCGGTGAACCAGGC GACGGAGACTTAGTAAGCGACGCTTTCAAAGCGGCTACCCCAGAAGAAAAATCAATGCCA CATTGGTTTGATACTTGGATCCGTGTAGAAAGA…	GGAAATTGCGCAGCTACAGTCGATGTAGAATATCCGGTATTCCCGAAAGATAAAGAAGGC CGTGCACTTCAGAAATTCCTCGGAACCATTCGTAACGTAGGTTTGGCCGTTGAAGCTCCT AAAAAAAGTCTTTGGGAAGCAATTTTCGGTGAAGGTTCCAGCTTTATCGATCAGATGCCT TCTAAAGTTTTCGAGGCGTTTGACAAAGAATCTTATTACAAACTTACCGACCTAAGCAAA CGTGCAGACGCAATCAACGAAGCAAGTCTTTCTCTTACAGGAATCACTAAAAATAGAGCG AAGATCGGAAATCTGATTGGAGCGGAAGCAATTCTATACATAGGTTACCAAAAACCTTAT ACAGAGTGTAGTACTGAAAATAAAATCGATGCG…	CACGTGGGTAATCTTCCTTCGAGTCTGGGATAACTTTCCGAAAGGGGAGCTAATACTGGA TAGTCCCGATAGATCATAGGATGTATCGGGTAAAGATTCATTGCTCGGAGATGAGCCCGC GTCCGATTAGCTAGTTGGTGAGGTAAAGGCTCACCAAGGCGACGATCGGTAGCCGGCCTG AGAGGGTGTTCGGCCACAATGGAACTGAGACACGGTCCATACTCCTACGGGAGGCAGCAG TTAAGAATCTTGCTCAATGGGGGGAACCCTGAAGCAGCGACGCCGCGTGAACGATGAAGG TCTTCGGATTGTAAAGTTCAATAAGCAGGGAAAAATAAGCAGCGATGTGATGATGGTACC TGCCTAAAGCACCGGCTAACTACGTGCCAGCAG…	ATGCCGATCATTTTTGCTTCGTCTTTGATTTTATTTCCTCAGACGATTATTCAATGGTTA TCTAATAGTAGTCAAGAATGGGCTGGATGGGCAGTGATTATGGATTTTTTTAATCCATTC TCTCAGATTTGGTATCATGCGTTATTTTATTTCGTAATTTATACCGCTTTAATTGTATTC TTTGCTTACTTTTATACAGCGATTCAGTTTAATCCTGCAGAATTGGCTGAGAATTTGAAA AAATACGGTGGATTCATTCCAGGAATTCGTCCGGGTTCTCACACAAAAGAATATATTGAA AAAGTGTTAAATAGAATCACTCTTCCCGGAGCTATGTTTCTTGCAGGTTTGGCATTAGCA CCTTATATTATTATAAAATTCTTAGATTTGAGC…
99	VC9	L.interrogans	Andaman/India	Human clinical	CTTTCTATTCCTCAGATTTCTACAGGAGATATTTTACGCGAGGCAGTAAAGAATCAAACT GCGATGGGAATAGAAGCAAAACGTTATATGGATGCGGGAGACTTGGTTCCAGATTCCGTA GTGATTGGAATCATAAAAGATCGCATTCGAGAAGCGGATTGTAAAAATGGATTTTTGTTG GATGGATTTCCGAGAACCGTGGAACAAGCGGAAGCTTTAGATACACTTTTAAAAAATGAA GGCAAGTCTATTGATAAAGCGATTAATCTTCAGGTTCCGGATGCGGAACTCTTAAAGAGA TTACTCGGCCGTGCAGAAATAGAAGGTCGCGCGGACGATAACGAAGTGACGATTAAAAAT CGTCTCGATAATTATAATAAGAAGACCTTACCT…	TATCTCGATATAGAACTGGATTATTATGATTTAGGCGTGGAGTACAGGGACAAAACGGAT GATAAAGTAACCGTGGATTCTGCTCACGCGATTCAAAAATATGGAGTAGGCGTAAAATGT GCGACGATTACTCCTAACCAAGATAGAGTTAAAGAATACAATCTCAAACAAGAATGGAAA TCTCCGAACGGAACCATTCGTTCTATTTTAGACGGAACCGTTTTTCGTAAACCGATCATC GTAAAAAATATTCCTCCTGCGGTTCGTTCTTGGAAAAAACCGATTACAGTAGGACGTCAC GCTTACGGAGATCTTTATAAGGACACAGAACTTTATATTCCCGAAGCCGGAAAGGTGGAA CTCGTTTATACCGGAAAGGACGGAAAAGAAAAA…	ATCTCCGTTGCACTCTTTGCAAGCATTACCGCTTGTGGTGCTTTCGGTGGTCTGCCAAGC CTAAAAAGCTCTTTTGTTCTGAGCGAGGACACAATCCCAGGGACAAACGAAACCGTAAAA ACGTTACTTCCCTACGGATCTGTGATCAACTATTACGGATACGTAAAGCCAGGACAAGCG CCGGACGGTTTAGTCGATGGAAACAAAAAAGCATACTATCTCTATGTTTGGATTCCTGCC GTAATCGCTGAAATGGGAGTTCGTATGATTTCCCCAACAGGCGAAATCGGTGAACCAGGC GACGGAGACTTAGTAAGCGACGCTTTCAAAGCGGCTACCCCAGAAGAAAAATCAATGCCA CATTGGTTTGATACTTGGATCCGTGTAGAAAGA…	GGAAATTGCGCAGCTACAGTCGATGTAGAATATCCGGTATTCCCGAAAGATAAAGAAGGC CGTGCACTTCAGAAATTCCTCGGAACCATTCGTAACGTAGGTTTGGCCGTTGAAGCTCCT AAAAAAAGTCTTTGGGAAGCAATTTTCGGTGAAGGTTCCAGCTTTATCGATCAGATGCCT TCTAAAGTTTTCGAGGCGTTTGACAAAGAATCTTATTACAAACTTACCGACCTAAGCAAA CGTGCAGACGCAATCAACGAAGCAAGTCTTTCTCTTACAGGAATCACTAAAAATAGAGCG AAGATCGGAAATCTGATTGGAGCGGAAGCAATTCTATACATAGGTTACCAAAAACCTTAT ACAGAGTGTAGTACTGAAAATAAAATCGATGCG…	CACGTGGGTAATCTTCCTCCGAGTCTGGGATAACTTTCCGAAAGGGGAGCTAATACTGGA TAGTCCCGATAGATCATAGGATGTATCGGGTAAAGATTCATTGCTCGGAGATGAGCCCGC GTCCGATTAGCTAGTTGGTGAGGTAAAGGCTCACCAAGGCGACGATCGGTAGCCGGCCTG AGAGGGTGTTCGGCCACAATGGAACTGAGACACGGTCCATACTCCTACGGGAGGCAGCAG TTAAGAATCTTGCTCAATGGGGGGAACCCTGAAGCAGCGACGCCGCGTGAACGATGAAGG TCTTCGGATTGTAAAGTTCAATAAGCAGGGAAAAATAAGCAGCGATGTGATGATGGTACC TGCCTAAAGCACCGGCTAACTACGTGCCAGCAG…	ATGCCGATCATTTTTGCTTCGTCTTTGATTTTATTTCCTCAGACGATTATTCAATGGTTA TCTAATAGTAGTCAAGAATGGGCTGGATGGGCAGTGATTATGGATTTTTTTAATCCATTC TCTCAGATTTGGTATCATGCGTTATTTTATTTCGTAATTTATACCGCTTTAATTGTATTC TTTGCTTACTTTTATACAGCGATTCAGTTTAATCCTGCAGAATTGGCTGAGAATTTGAAA AAATACGGTGGATTCATTCCAGGAATTCGTCCGGGTTCTCACACAAAAGAATATATTGAA AAAGTGTTAAATAGAATCACTCTTCCCGGAGCTATGTTTCTTGCAGGTTTGGCATTAGCA CCTTATATTATTATAAAATTCTTAGATTTGAGC…
100	VC10	L.interrogans	Andaman/India	Human clinical	CTTTCTATTCCTCAGATTTCTACAGGAGATATTTTACGCGAGGCAGTAAAGAATCAAACT GCGATGGGAATAGAAGCAAAACGTTATATGGATGCGGGAGACTTGGTTCCAGATTCCGTA GTGATTGGAATCATAAAAGATCGCATTCGAGAAGCGGATTGTAAAAATGGATTTTTGTTG GATGGATTTCCGAGAACCGTGGAACAAGCGGAAGCTTTAGATACACTTTTAAAAAATGAA GGCAAGTCTATTGATAAAGCGATTAATCTTCAGGTTCCGGATGCGGAACTCTTAAAGAGA TTACTCGGCCGTGCAGAAATAGAAGGTCGCGCGGACGATAACGAAGTGACGATTAAAAAT CGTCTCGATAATTATAATAAGAAGACCTTACCT…	TATCTCGATATAGAACTGGATTATTATGATTTAGGCGTGGAGTACAGGGACAAAACGGAT GATAAAGTAACCGTGGATTCTGCTCACGCGATTCAAAAATATGGAGTAGGCGTAAAATGT GCGACGATTACTCCTAACCAAGATAGAGTTAAAGAATACAATCTCAAACAAGAATGGAAA TCTCCGAACGGAACCATTCGTTCTATTTTAGACGGAACCGTTTTTCGTAAACCGATCATC GTAAAAAATATTCCTCCTGCGGTTCGTTCTTGGAAAAAACCGATTACAGTAGGACGTCAC GCTTACGGAGATCTTTATAAGGACACAGAACTTTATATTCCCGAAGCCGGAAAGGTGGAA CTCGTTTATACCGGAAAGGACGGAAAAGAAAAA…	ATCTCCGTTGCACTCTTTGCAAGCATTACCGCTTGTGGTGCTTTCGGTGGTCTGCCAAGC CTAAAAAGCTCTTTTGTTCTGAGCGAGGACACAATCCCAGGGACAAACGAAACCGTAAAA ACGTTACTTCCCTACGGATCTGTGATCAACTATTACGGATACGTAAAGCCAGGACAAGCG CCGGACGGTTTAGTCGATGGAAACAAAAAAGCATACTATCTCTATGTTTGGATTCCTGCC GTAATCGCTGAAATGGGAGTTCGTATGATTTCCCCAACAGGCGAAATCGGTGAACCAGGC GACGGAGACTTAGTAAGCGACGCTTTCAAAGCGGCTACCCCAGAAGAAAAATCAATGCCA CATTGGTTTGATACTTGGATCCGTGTAGAAAGA…	GGAAATTGCGCAGCTACAGTCGATGTAGAATATCCGGTATTCCCGAAAGATAAAGAAGGC CGTGCACTTCAGAAATTCCTCGGAACCATTCGTAACGTAGGTTTGGCCGTTGAAGCTCCT AAAAAAAGTCTTTGGGAAGCAATTTTCGGTGAAGGTTCCAGCTTTATCGATCAGATGCCT TCTAAAGTTTTCGAGGCGTTTGACAAAGAATCTTATTACAAACTTACCGACCTAAGCAAA CGTGCAGACGCAATCAACGAAGCAAGTCTTTCTCTTACAGGAATCACTAAAAATAGAGCG AAGATCGGAAATCTGATTGGAGCGGAAGCAATTCTATACATAGGTTACCAAAAACCTTAT ACAGAGTGTAGTACTGAAAATAAAATCGATGCG…	CACGTGGGTAATCTTCCTCCGAGTCTGGGATAACTTTCCGAAAGGGGAGCTAATACTGGA TAGTCCCGATAGATCATAGGATGTATCGGGTAAAGATTCATTGCTCGGAGATGAGCCCGC GTCCGATTAGCTAGTTGGTGAGGTAAAGGCTCACCAAGGCGACGATCGGTAGCCGGCCTG AGAGGGTGTTCGGCCACAATGGAACTGAGACACGGTCCATACTCCTACGGGAGGCAGCAG TTAAGAATCTTGCTCAATGGGGGGAACCCTGAAGCAGCGACGCCGCGTGAACGATGAAGG TCTTCGGATTGTAAAGTTCAATAAGCAGGGAAAAATAAGCAGCGATGTGATGATGGTACC TGCCTAAAGCACCGGCTAACTACGTGCCAGCAG…	ATGCCGATCATTTTTGCTTCGTCTTTGATTTTATTTCCTCAGACGATTATTCAATGGTTA TCTAATAGTAGTCAAGAATGGGCTGGATGGGCAGTGATTATGGATTTTTTTAATCCATTC TCTCAGATTTGGTATCATGCGTTATTTTATTTCGTAATTTATACCGCTTTAATTGTATTC TTTGCTTACTTTTATACAGCGATTCAGTTTAATCCTGCAGAATTGGCTGAGAATTTGAAA AAATACGGTGGATTCATTCCAGGAATTCGTCCGGGTTCTCACACAAAAGAATATATTGAA AAAGTGTTAAATAGAATCACTCTTCCCGGAGCTATGTTTCTTGCAGGTTTGGCATTAGCA CCTTATATTATTATAAAATTCTTAGATTTGAGC…
101	VC11	L.interrogans	Andaman/India	Human clinical	CTTTCTATTCCTCAGATTTCTACAGGAGATATTTTACGCGAGGCAGTAAAGAATCAAACT GCGATGGGAATAGAAGCAAAACGTTATATGGATGCGGGAGACTTGGTTCCAGATTCCGTA GTGATTGGAATCATAAAAGATCGCATTCGAGAAGCGGATTGTAAAAATGGATTTTTGTTG GATGGATTTCCGAGAACCGTGGAACAAGCGGAAGCTTTAGATACACTTTTAAAAAATGAA GGCAAGTCTATTGATAAAGCGATTAATCTTCAGGTTCCGGATGCGGAACTCTTAAAGAGA TTACTCGGCCGTGCAGAAATAGAAGGTCGCGCGGACGATAACGAAGTGACGATTAAAAAT CGTCTCGATAATTATAATAAGAAGACCTTACCT…	TATCTCGATATAGAACTGGATTATTATGATTTAGGCGTGGAGTACAGGGACAAAACGGAT GATAAAGTAACCGTGGATTCTGCTCACGCGATTCAAAAATATGGAGTAGGCGTAAAATGT GCGACGATTACTCCTAACCAAGATAGAGTTAAAGAATACAATCTCAAACAAGAATGGAAA TCTCCGAACGGAACCATTCGTTCTATTTTAGACGGAACCGTTTTTCGTAAACCGATCATC GTAAAAAATATTCCTCCTGCGGTTCGTTCTTGGAAAAAACCGATTACAGTAGGACGTCAC GCTTACGGAGATCTTTATAAGGACACAGAACTTTATATTCCCGAAGCCGGAAAGGTGGAA CTCGTTTATACCGGAAAGGACGGAAAAGAAAAA…	ATCTCCGTTGCACTCTTTGCAAGCATTACCGCTTGTGGTGCTTTCGGTGGTCTGCCAAGC CTAAAAAGCTCTTTTGTTCTGAGCGAGGACACAATCCCAGGGACAAACGAAACCGTAAAA ACGTTACTTCCCTACGGATCTGTGATCAACTATTACGGATACGTAAAGCCAGGACAAGCG CCGGACGGTTTAGTCGATGGAAACAAAAAAGCATACTATCTCTATGTTTGGATTCCTGCC GTAATCGCTGAAATGGGAGTTCGTATGATTTCCCCAACAGGCGAAATCGGTGAACCAGGC GACGGAGACTTAGTAAGCGACGCTTTCAAAGCGGCTACCCCAGAAGAAAAATCAATGCCA CATTGGTTTGATACTTGGATCCGTGTAGAAAGA…	GGAAATTGCGCAGCTACAGTCGATGTAGAATATCCGGTATTCCCGAAAGATAAAGAAGGC CGTGCACTTCAGAAATTCCTCGGAACCATTCGTAACGTAGGTTTGGCCGTTGAAGCTCCT AAAAAAAGTCTTTGGGAAGCAATTTTCGGTGAAGGTTCCAGCTTTATCGATCAGATGCCT TCTAAAGTTTTCGAGGCGTTTGACAAAGAATCTTATTACAAACTTACCGACCTAAGCAAA CGTGCAGACGCAATCAACGAAGCAAGTCTTTCTCTTACAGGAATCACTAAAAATAGAGCG AAGATCGGAAATCTGATTGGAGCGGAAGCAATTCTATACATAGGTTACCAAAAACCTTAT ACAGAGTGTAGTACTGAAAATAAAATCGATGCG…	CACGTGGGTAATCTTCCTCCGAGTCTGGGATAACTTTCCGAAAGGGGAGCTAATACTGGA TAGTCCCGATAGATCATAGGATGTATCGGGTAAAGATTCATTGCTCGGAGATGAGCCCGC GTCCGATTAGCTAGTTGGTGAGGTAAAGGCTCACCAAGGCGACGATCGGTAGCCGGCCTG AGAGGGTGTTCGGCCACAATGGAACTGAGACACGGTCCATACTCCTACGGGAGGCAGCAG TTAAGAATCTTGCTCAATGGGGGGAACCCTGAAGCAGCGACGCCGCGTGAACGATGAAGG TCTTCGGATTGTAAAGTTCAATAAGCAGGGAAAAATAAGCAGCGATGTGATGATGGTACC TGCCTAAAGCACCGGCTAACTACGTGCCAGCAG…	ATGCCGATCATTTTTGCTTCGTCTTTGATTTTATTTCCTCAGACGATTATTCAATGGTTA TCTAATAGTAGTCAAGAATGGGCTGGATGGGCAGTGATTATGGATTTTTTTAATCCATTC TCTCAGATTTGGTATCATGCGTTATTTTATTTCGTAATTTATACCGCTTTAATTGTATTC TTTGCTTACTTTTATACAGCGATTCAGTTTAATCCTGCAGAATTGGCTGAGAATTTGAAA AAATACGGTGGATTCATTCCAGGAATTCGTCCGGGTTCTCACACAAAAGAATATATTGAA AAAGTGTTAAATAGAATCACTCTTCCCGGAGCTATGTTTCTTGCAGGTTTGGCATTAGCA CCTTATATTATTATAAAATTCTTAGATTTGAGC…
102	VC12	L.interrogans	Andaman/India	Human clinical	CTTTCTATCCCTCAGATTTCCACAGGCGATATTCTCCGCGAAGCGGTAAAGAATCAAACT GAGATGGGAATCGAAGCAAAACGTTATATGGATGCAGGTGATCTGGTACCTGATTCTGTT GTGATCGGAATCATCAAAGATCGTATCCGTGAAGCGGATTGCAGAAATGGGTTTTTATTG GATGGATTTCCAAGAACTGTAGAACAGGCGGAAGCTTTAGATACACTTTTAAAAAATGAA GGTAGGTCTATTGATAAAGCGATTAATCTTCAGGTTCCGGATGCGGAACTTTTAAAAAGA TTACTCAGCCGTGCAGAAATTGAAGGCCGTGCGGACGATAACGAAGTGACGATTAAAAAT CGTCTAGATAATTATAACAAGAAGACTTTACCT…	TATCTCGATATCGAACTGGACTATTATGATTTAGGCGTGGAGTATAGGGATAAAACCGAC GATAAGGTCACCGTGGATTCCGCACACGCAATTCAAAAATACGGAGTGGGCGTAAAATGC GCGACCATCACTCCGAATCAGGACAGAGTAAAGGAATACAGCCTCAAACAAGAATGGAAA TCTCCGAACGGAACGATTCGTTCGATTTTGGACGGAACCGTTTTCCGTAAACCGATCATA GTAAAAAATATCCCTCCTGCCGTTCGTTCTTGGAAAAAACCGATCACCGTCGGTCGTCAC GCATACGGAGATCTTTATAAAGACACCGAAATCTATATTCCGGAAGCCGGGAAAGTGGAA CTGGTTTATACCGGAAAAGACGGAAAAGAAAAA…	ATCTCCGTTGCACTCTTTGCAAGCATTACCGCTTGTGGTGCTTTCGGTGGTCTGCCAAGC CTAAAAAGCTCTTTTGTTCTGAGCGAGGACACAATCCCAGGGACAAACGAAACCGTAAAA ACGTTACTTCCCTACGGATCTGTGATCAACTATTACGGATACGTAAAGCCAGGACAAGCG CCGGACGGTTTAGTCGATGGAAACAAAAAAGCATACTATCTCTATGTTTGGATTCCTGCC GTAATCGCTGAAATGGGAGTTCGTATGATTTCCCCAACAGGCGAAATCGGTGAACCAGGC GACGGAGACTTAGTAAGCGACGCTTTCAAAGCGGCTACCCCAGAAGAAAAATCAATGCCA CATTGGTTTGATACTTGGATCCGTGTAGAAAGA…	GGAAATTGCGCAGCTACAGTCGATGTAGAATATCCGGTATTCCCGAAAGATAAAGAAGGC CGTGCACTTCAGAAATTCCTCGGAACCATTCGTAACGTAGGTTTGGCCGTTGAAGCTCCT AAAAAAAGTCTTTGGGAAGCAATTTTCGGTGAAGGTTCCAGCTTTATCGATCAGATGCCT TCTAAAGTTTTCGAGGCGTTTGACAAAGAATCTTATTACAAACTTACCGACCTAAGCAAA CGTGCAGACGCAATCAACGAAGCAAGTCTTTCTCTTACAGGAATCACTAAAAATAGAGCG AAGATCGGAAATCTGATTGGAGCGGAAGCAATTCTATACATAGGTTACCAAAAACCTTAT ACAGAGTGTAGTACTGAAAATAAAATCGATGCG…	CACGTGGGTAATCTTCCTCCGAGTCTGGGATAACTTTCCGAAAGGGGAGCTAATACTGGA TAGTCCCGATAGATCATAGGATGTATCGGGTAAAGATTCATTGCTCGGAGATGAGCCCGC GTCCGATTAGCTAGTTGGTGAGGTAAAGGCTCACCAAGGCGACGATCGGTAGCCGGCCTG AGAGGGTGTTCGGCCACAATGGAACTGAGACACGGTCCATACTCCTACGGGAGGCAGCAG TTAAGAATCTTGCTCAATGGGGGGAACCCTGAAGCAGCGACGCCGCGTGAACGATGAAGG TCTTCGGATTGTAAAGTTCAATAAGCAGGGAAAAATAAGCAGCGATGTGATGATGGTACC TGCCTAAAGCACCGGCTAACTACGTGCCAGCAG…	ATGCCGATCATTTTTGCTTCTTCTTTGATCTTGTTTCCGCAGACGATCATTCAGTGGTTG TCTTCCAGCAGCGAACAGTGGGCCGGTTGGGCGATCATTATGGACTTTTTCAATCCGTTC TCCCAGATCTGGTATCACGCGTTGTTCTACTATGTAATCTATACTTCTTTGATTATCTTT TTCGCATACTTTTATACCGCAATTCAGTTTAACCCGGCTGAGTTGGCTGAAAACCTGAAG AAATACGGCGGATTCATTCCGGGAATTCGTCCGGGTTCTCACACAAAAGAATATATCGAA AAAGTGTTAAATAGGATCACTCTTCCGGGAGCTATGTTTCTCGCTGGATTGGCATTAGCA CCTTATATTATTATAAAATTCTTAGATTTGAGC…
103	VC13	L.interrogans	Andaman/India	Human clinical	CTTTCTATTCCTCAGATTTCTACAGGAGATATTTTACGCGAGGCAGTAAAGAATCAAACT GCGATGGGAATAGAAGCAAAACGTTATATGGATGCGGGAGACTTGGTTCCAGATTCCGTA GTGATTGGAATCATAAAAGATCGCATTCGAGAAGCGGATTGTAAAAATGGATTTTTGTTG GATGGATTTCCGAGAACCGTGGAACAAGCGGAAGCTTTAGATACACTTTTAAAAAATGAA GGCAAGTCTATTGATAAAGCGATTAATCTTCAGGTTCCGGATGCGGAACTCTTAAAGAGA TTACTCGGCCGTGCAGAAATAGAAGGTCGCGCGGACGATAACGAAGTGACGATTAAAAAT CGTCTCGATAATTATAATAAGAAGACCTTACCT…	TATCTCGATATAGAACTGGATTATTATGATTTAGGCGTGGAGTACAGGGACAAAACGGAT GATAAAGTAACCGTGGATTCTGCTCACGCGATTCAAAAATATGGAGTAGGCGTAAAATGT GCGACGATTACTCCTAACCAAGATAGAGTTAAAGAATACAATCTCAAACAAGAATGGAAA TCTCCGAACGGAACCATTCGTTCTATTTTAGACGGAACCGTTTTTCGTAAACCGATCATC GTAAAAAATATTCCTCCTGCGGTTCGTTCTTGGAAAAAACCGATTACAGTAGGACGTCAC GCTTACGGAGATCTTTATAAGGACACAGAACTTTATATTCCCGAAGCCGGAAAGGTGGAA CTCGTTTATACCGGAAAGGACGGAAAAGAAAAA…	ATCTCCGTTGCACTCTTTGCAAGCATTACCGCTTGTGGTGCTTTCGGTGGTCTGCCAAGC CTAAAAAGCTCTTTTGTTCTGAGCGAGGACACAATCCCAGGGACAAACGAAACCGTAAAA ACGTTACTTCCCTACGGATCTGTGATCAACTATTACGGATACGTAAAGCCAGGACAAGCG CCGGACGGTTTAGTCGATGGAAACAAAAAAGCATACTATCTCTATGTTTGGATTCCTGCC GTAATCGCTGAAATGGGAGTTCGTATGATTTCCCCAACAGGCGAAATCGGTGAACCAGGC GACGGAGACTTAGTAAGCGACGCTTTCAAAGCGGCTACCCCAGAAGAAAAATCAATGCCA CATTGGTTTGATACTTGGATCCGTGTAGAAAGA…	GGAAATTGCGCAGCTACAGTCGATGTAGAATATCCGGTATTCCCGAAAGATAAAGAAGGC CGTGCACTTCAGAAATTCCTCGGAACCATTCGTAACGTAGGTTTGGCCGTTGAAGCTCCT AAAAAAAGTCTTTGGGAAGCAATTTTCGGTGAAGGTTCCAGCTTTATCGATCAGATGCCT TCTAAAGTTTTCGAGGCGTTTGACAAAGAATCTTATTACAAACTTACCGACCTAAGCAAA CGTGCAGACGCAATCAACGAAGCAAGTCTTTCTCTTACAGGAATCACTAAAAATAGAGCG AAGATCGGAAATCTGATTGGAGCGGAAGCAATTCTATACATAGGTTACCAAAAACCTTAT ACAGAGTGTAGTACTGAAAATAAAATCGATGCG…	CACGTGGGTAATCTTCCTCCGAGTCTGGGATAACTTTCCGAAAGGGGAGCTAATACTGGA TAGTCCCGATAGATCATAGGATGTATCGGGTAAAGATTCATTGCTCGGAGATGAGCCCGC GTCCGATTAGCTAGTTGGTGAGGTAAAGGCTCACCAAGGCGACGATCGGTAGCCGGCCTG AGAGGGTGTTCGGCCACAATGGAACTGAGACACGGTCCATACTCCTACGGGAGGCAGCAG TTAAGAATCTTGCTCAATGGGGGGAACCCTGAAGCAGCGACGCCGCGTGAACGATGAAGG TCTTCGGATTGTAAAGTTCAATAAGCAGGGAAAAATAAGCAGCGATGTGATGATGGTACC TGCCTAAAGCACCGGCTAACTACGTGCCAGCAG…	ATGCCGATCATTTTTGCTTCGTCTTTGATTTTATTTCCTCAGACGATTATTCAATGGTTA TCTAATAGTAGTCAAGAATGGGCTGGATGGGCAGTGATTATGGATTTTTTTAATCCATTC TCTCAGATTTGGTATCATGCGTTATTTTATTTCGTAATTTATACCGCTTTAATTGTATTC TTTGCTTACTTTTATACAGCGATTCAGTTTAATCCTGCAGAATTGGCTGAGAATTTGAAA AAATACGGTGGATTCATTCCAGGAATTCGTCCGGGTTCTCACACAAAAGAATATATTGAA AAAGTGTTAAATAGAATCACTCTTCCCGGAGCTATGTTTCTTGCAGGTTTGGCATTAGCA CCTTATATTATTATAAAATTCTTAGATTTGAGC…
104	VC14	L.interrogans	Andaman/India	Human clinical	CTTTCTATTCCTCAGATTTCTACAGGAGATATTTTACGCGAGGCAGTAAAGAATCAAACT GCGATGGGAATAGAAGCAAAACGTTATATGGATGCGGGAGATTTGGTTCCAGATTCCGTA GTGATTGGAATCATAAAAGATCGCATTCGAGAAGCGGATTGTAAAAATGGATTTTTGTTG GATGGATTTCCGAGAACCGTGGAACAAGCGGAAGCTTTAGATACACTTTTAAAAAATGAA GGCAAGTCTATTGATAAAGCGATTAATCTTCAGGTTCCGGATGCGGAACTCTTAAAGAGA TTACTCGGCCGTGCAGAAATAGAAGGTCGCGCGGACGATAACGAAGTGACGATTAAAAAT CGTCTCGATAATTATAATAAGAAGACCTTACCT…	TATCTCGATATAGAACTGGATTATTATGATTTAGGCGTGGAGTACAGGGACAAAACGGAT GATAAAGTAACTGTGGATTCTGCTCACGCGATTCAAAAATATGGAGTAGGCGTAAAATGT GCGACGATTACTCCTAACCAAGATAGAGTTAAAGAATACAATCTCAAACAAGAATGGAAA TCTCCGAACGGAACCATTCGTTCTATTTTAGACGGAACCGTTTTTCGTAAACCGATCATC GTAAAAAATATTCCTCCTGCGGTTCGTTCTTGGAAAAAACCGATTACAGTAGGACGTCAC GCTTACGGAGATCTTTATAAGGACACAGAACTTTATATTCCCGAAGCCGGAAAGGTGGAA CTCGTTTATACCGGAAAGGACGGAAAAGAAAAA…	ATCTCCGTTGCACTCTTTGCAAGCATTACCGCTTGTGGTGCTTTCGGTGGTCTGCCAAGC CTAAAAAGCTCTTTTGTTCTGAGCGAGGACACAATCCCAGGGACAAACGAAACCGTAAAA ACGTTACTTCCCTACGGATCTGTGATCAACTATTACGGATACGTAAAGCCAGGACAAGCG CCGGACGGTTTAGTCGATGGAAACAAAAAAGCATACTATCTCTATGTTTGGATTCCTGCC GTAATCGCTGAAATGGGAGTTCGTATGATTTCCCCAACAGGCGAAATCGGTGAGCCAGGC GACGGAGACTTAGTAAGCGACGCTTTCAAAGCGGCTACCCCAGAAGAAAAATCAATGCCA CATTGGTTTGATACTTGGATCCGTGTAGAAAGA…	GGAAATTGCGCAGCTACAGTCGATGTAGAATATCCGGTATTCCCGAAAGATAAAGAAGGC CGTGCACTTCAGAAATTCCTCGGAACCATTCGTAACGTAGGTTTGGCTGTTGAAGCTCCT AAAAAAAGTCTTTGGGAAGCAATTTTCGGTGAAGGTTCCAGCTTTATCGATCAGATGCCT TCTAAAGTTTTCGAGGCGTTTGACAAAGAATCTTATTACAAACTTACCGATCTGAGTAAA CGTGCAGACGCAATCAACGAAGCAAGTCTTTCTCTTACAGGAATCACTAAAAATAGAGCG AAGATCGGAAATCTGATTGGAGCGGAAGCAATTCTATACATAGGTTACCAAAAACCTTAT ACAGAGTGTAGTACTGAAAATAAAATCGATGCG…	CACGTGGGTAATCTTCCTCCGAGTCTGGGATAACTTTCCGAAAGGGGAGCTAATACTGGA TAGTCCCGATAGATCATAGGATGTTTCGGGTAAAGATTCATTGCTCGGAGATGAGCCCGC GTCCGATTAGCTAGTTGGTGAGGTAAAGGCTCACCAAGGCGACGATCGGTAGCCGGCCTG AGAGGGTGTTCGGCCACAATGGAACTGAGACACGGTCCATACTCCTACGGGAGGCAGCAG TTAAGAATCTTGCTCAATGGGGGGAACCCTGAAGCAGCGACGCCGCGTGAACGATGAAGG TCTTCGGATTGTAAAGTTCAATAAGCAGGGAAAAATAAGCAGCGATGTGATGATGGTACC TGCCTAAAGCACCGGCTAACTACGTGCCAGCAG…	ATGCCGATCATTTTTGCTTCGTCTTTGATTTTATTTCCTCAGACGATTATTCAATGGTTA TCTAATAGTAGTCAAGAATGGGCTGGATGGGCAGTGATTATGGATTTTTTTAATCCATTC TCTCAGATTTGGTATCATGCGTTATTTTATTTCGTAATTTATACCGCTTTAATTGTATTC TTTGCTTACTTTTATACAGCGATTCAGTTTAATCCTGCAGAATTGGCTGAGAATTTGAAA AAATACGGTGGGTTCATTCCAGGAATTCGTCCGGGTTCTCACACAAAAGAATACATTGAA AAAGTGTTAAATAGAATCACTCTTCCCGGAGCTATGTTTCTTGCAGGTTTGGCATTAGCA CCTTATATTATTATAAAATTCTTAGATTTGAGC…
105	VC15	L.interrogans	Andaman/India	Human clinical	CTTTCTATTCCTCAGATTTCTACAGGAGATATTTTACGCGAGGCAGTAAAGAATCAAACT GCGATGGGAATAGAAGCAAAACGTTATATGGATGCGGGAGATTTGGTTCCAGATTCCGTA GTGATTGGAATCATAAAAGATCGCATTCGAGAAGCGGATTGTAAAAATGGATTTTTGTTG GATGGATTTCCGAGAACCGTGGAACAAGCGGAAGCTTTAGATACACTTTTAAAAAATGAA GGCAAGTCTATTGATAAAGCGATTAATCTTCAGGTTCCGGATGCGGAACTCTTAAAGAGA TTACTCGGCCGTGCAGAAATAGAAGGTCGCGCGGACGATAACGAAGTGACGATTAAAAAT CGTCTCGATAATTATAATAAGAAGACCTTACCT…	TATCTCGATATAGAACTGGATTATTATGATTTAGGCGTGGAGTACAGAGACAAAACGGAT GATAAAGTAACTGTGGATTCTGCTCACGCGATTCAAAAATATGGAGTAGGCGTAAAATGT GCGACGATTACTCCTAACCAAGATAGAGTTAAAGAATACAATCTCAAACAAGAATGGAAA TCTCCGAACGGAACCATTCGTTCTATTTTAGACGGAACCGTTTTTCGTAAACCGATCATC GTAAAAAATATTCCTCCTGCGGTTCGTTCTTGGAAAAAACCGATTACAGTAGGACGTCAC GCTTACGGAGATCTTTATAAGGACACAGAACTTTATATTCCCGAAGCCGGAAAGGTGGAA CTCGTTTATACCGGAAAGGACGGAAAAGAAAAA…	ATCTCCGTTGCACTCTTTGCAAGCATTACCGCTTGTGGTGCTTTCGGTGGTCTGCCAAGC CTAAAAAGCTCTTTTGTTCTGAGCGAGGACACAATCCCAGGGACAAACGAAACCGTAAAA ACGTTACTTCCCTACGGATCTGTGATCAACTATTACGGATACGTAAAGCCAGGACAAGCG CCGGACGGTTTAGTCGATGGAAACAAAAAAGCATACTATCTCTATGTTTGGATTCCTGCC GTAATCGCTGAAATGGGAGTTCGTATGATTTCCCCAACAGGCGAAATCGGTGAACCAGGC GACGGAGACTTAGTAAGCGACGCTTTCAAAGCGGCTACCCCAGAAGAAAAATCAATGCCA CATTGGTTTGATACTTGGATCCGTGTAGAAAGA…	GGAAATTGCGCAGCTACAGTCGATGTAGAATATCCGGTATTCCCGAAAGATAAAGAAGGC CGTGCACTTCAGAAATTCCTCGGAACCATTCGTAACGTAGGTTTGGCCGTTGAAGCTCCT AAAAAAAGTCTTTGGGAAGCAATTTTCGGTGAAGGTTCCAGCTTTATCGATCAGATGCCT TCTAAAGTTTTCGAGGCGTTTGACAAAGAATCTTATTACAAACTTACCGACCTAAGCAAA CGTGCAGACGCAATCAACGAAGCAAGTCTTTCTCTTACAGGAATCACTAAAAATAGAGCG AAGATCGGAAATCTGATTGGAGCGGAAGCAATTCTATACATAGGTTACCAAAAACCTTAT ACAGAGTGTAGTACTGAAAATAAAATCGATGCG…	CACGTGGGTAATCTTCCTCCGAGTCTGGGATAACTTTCCGAAAGGGGAGCTAATACTGGA TAGTCCCGATAGATCATAGGATGTTTCGGGTAAAGATTCATTGCTCGGAGATGAGCCCGC GTCCGATTAGCTAGTTGGTGAGGTAAAGGCTCACCAAGGCGACGATCGGTAGCCGGCCTG AGAGGGTGTTCGGCCACAATGGAACTGAGACACGGTCCATACTCCTACGGGAGGCAGCAG TTAAGAATCTTGCTCAATGGGGGGAACCCTGAAGCAGCGACGCCGCGTGAACGATGAAGG TCTTCGGATTGTAAAGTTCAATAAGCAGGGAAAAATAAGCAGCGATGTGATGATGGTACC TGCCTAAAGCACCGGCTAACTACGTGCCAGCAG…	ATGCCGATCATTTTTGCTTCGTCTTTGATTTTATTTCCTCAGACGATTATTCAATGGTTA TCTAATAGTAGTCAAGAATGGGCTGGATGGGCAGTGATTATGGATTTTTTTAATCCATTC TCTCAGATTTGGTATCATGCGTTATTTTATTTCGTAATTTATACCGCTTTAATTGTATTC TTTGCTTACTTCTATACAGCGATTCAGTTTAATCCTGCAGAATTGGCTGAGAATTTGAAA AAATACGGTGGATTCATTCCAGGAATTCGTCCGGGTTCTCACACAAAAGAATACATTGAA AAAGTGTTAAATAGAATCACTCTCCCTGGAGCTATGTTTCTTGCAGGTTTGGCATTAGCA CCTTATATTATTATAAAATTCTTAGATTTGAGC…
106	VC16	L.interrogans	Andaman/India	Human clinical	CTTTCTATTCCTCAGATTTCTACAGGAGATATTTTACGCGAGGCAGTAAAGAATCAAACT GCGATGGGAATAGAAGCAAAACGTTATATGGATGCGGGAGACTTGGTTCCAGATTCCGTA GTGATTGGAATCATAAAAGATCGCATTCGAGAAGCGGATTGTAAAAATGGATTTTTGTTG GATGGATTTCCGAGAACCGTGGAACAAGCGGAAGCTTTAGATACACTTTTAAAAAATGAA GGCAAGTCTATTGATAAAGCGATTAATCTTCAGGTTCCGGATGCGGAACTCTTAAAGAGA TTACTCGGCCGTGCAGAAATAGAAGGTCGCGCGGACGATAACGAAGTGACGATTAAAAAT CGTCTCGATAATTATAATAAGAAGACCTTACCT…	TATCTCGATATAGAACTGGATTATTATGATTTAGGCGTGGAGTACAGGGACAAAACGGAT GATAAAGTAACCGTGGATTCTGCTCACGCGATTCAAAAATATGGAGTAGGCGTAAAATGT GCGACGATTACTCCTAACCAAGATAGAGTTAAAGAATACAATCTCAAACAAGAATGGAAA TCTCCGAACGGAACCATTCGTTCTATTTTAGACGGAACCGTTTTTCGTAAACCGATCATC GTAAAAAATATTCCTCCTGCGGTTCGTTCTTGGAAAAAACCGATTACAGTAGGACGTCAC GCTTACGGAGATCTTTATAAGGACACAGAACTTTATATTCCCGAAGCCGGAAAGGTGGAA CTCGTTTATACCGGAAAGGACGGAAAAGAAAAA…	ATCTCCGTTGCACTCTTTGCAAGCATTACCGCTTGTGGTGCTTTCGGTGGTCTGCCAAGC CTAAAAAGCTCTTTTGTTCTGAGCGAGGACACAATCCCAGGGACAAACGAAACCGTAAAA ACGTTACTTCCCTACGGATCTGTGATCAACTATTACGGATACGTAAAGCCAGGACAAGCG CCGGACGGTTTAGTCGATGGAAACAAAAAAGCATACTATCTCTATGTTTGGATTCCTGCC GTAATCGCTGAAATGGGAGTTCGTATGATTTCCCCAACAGGCGAAATCGGTGAACCAGGC GACGGAGACTTAGTAAGCGACGCTTTCAAAGCGGCTACCCCAGAAGAAAAATCAATGCCA CATTGGTTTGATACTTGGATCCGTGTAGAAAGA…	GGAAATTGCGCAGCTACAGTCGATGTAGAATATCCGGTATTCCCGAAAGATAAAGAAGGC CGTGCACTTCAGAAATTCCTCGGAACCATTCGTAACGTAGGTTTGGCCGTTGAAGCTCCT AAAAAAAGTCTTTGGGAAGCAATTTTCGGTGAAGGTTCCAGCTTTATCGATCAGATGCCT TCTAAAGTTTTCGAGGCGTTTGACAAAGAATCTTATTACAAACTTACCGACCTAAGCAAA CGTGCAGACGCAATCAACGAAGCAAGTCTTTCTCTTACAGGAATCACTAAAAATAGAGCG AAGATCGGAAATCTGATTGGAGCGGAAGCAATTCTATACATAGGTTACCAAAAACCTTAT ACAGAGTGTAGTACTGAAAATAAAATCGATGCG…	CACGTGGGTAATCTTCCTCCGAGTCTGGGATAACTTTCCGAAAGGGGAGCTAATACTGGA TAGTCCCGATAGATCATAGGATGTATCGGGTAAAGATTCATTGCTCGGAGATGAGCCCGC GTCCGATTAGCTAGTTGGTGAGGTAAAGGCTCACCAAGGCGACGATCGGTAGCCGGCCTG AGAGGGTGTTCGGCCACAATGGAACTGAGACACGGTCCATACTCCTACGGGAGGCAGCAG TTAAGAATCTTGCTCAATGGGGGGAACCCTGAAGCAGCGACGCCGCGTGAACGATGAAGG TCTTCGGATTGTAAAGTTCAATAAGCAGGGAAAAATAAGCAGCGATGTGATGATGGTACC TGCCTAAAGCACCGGCTAACTACGTGCCAGCAG…	ATGCCGATCATTTTTGCTTCGTCTTTGATTTTATTTCCTCAGACGATTATTCAATGGTTA TCTAATAGTAGTCAAGAATGGGCTGGATGGGCAGTGATTATGGATTTTTTTAATCCATTC TCTCAGATTTGGTATCATGCGTTATTTTATTTCGTAATTTATACCGCTTTAATTGTATTC TTTGCTTACTTTTATACAGCGATTCAGTTTAATCCTGCAGAATTGGCTGAGAATTTGAAA AAATACGGTGGATTCATTCCAGGAATTCGTCCGGGTTCTCACACAAAAGAATATATTGAA AAAGTGTTAAATAGAATCACTCTTCCCGGAGCTATGTTTCTTGCAGGTTTGGCATTAGCA CCTTATATTATTATAAAATTCTTAGATTTGAGC…
107	VC17	L.interrogans	Andaman/India	Human clinical	CTTTCTATTCCTCAGATTTCTACAGGAGATATTTTACGCGAGGCAGTAAAGAATCAAACT GCGATGGGAATAGAAGCAAAACGTTATATGGATGCGGGAGATTTGGTTCCAGATTCCGTA GTGATTGGAATCATAAAAGATCGCATTCGAGAAGCGGATTGTAAAAATGGATTTTTGTTG GATGGATTTCCGAGAACCGTGGAACAAGCGGAAGCTTTAGATACACTTTTAAAAAATGAA GGCAAGTCTATTGATAAAGCGATTAATCTTCAGGTTCCGGATGCGGAACTCTTAAAGAGA TTACTCGGCCGTGCAGAAATAGAAGGTCGCGCGGACGATAACGAAGTGACGATTAAAAAT CGTCTCGATAATTATAATAAGAAGACCTTACCT…	TATCTCGATATAGAACTGGATTATTATGATTTAGGCGTGGAGTACAGGGACAAAACGGAT GATAAAGTAACCGTGGATTCTGCTCACGCGATTCAAAAATATGGAGTAGGCGTAAAATGT GCGACGATTACTCCTAACCAAGATAGAGTTAAAGAATACAATCTCAAACAAGAATGGAAA TCTCCGAACGGAACCATTCGTTCTATTTTAGACGGAACCGTTTTTCGTAAACCGATCATC GTAAAAAATATTCCTCCTGCGGTTCGTTCTTGGAAAAAACCGATTACAGTAGGACGTCAC GCTTACGGAGATCTTTATAAGGACACAGAACTTTATATTCCCGAAGCCGGAAAGGTGGAA CTCGTTTATACCGGAAAGGACGGAAAAGAAAAA…	ATCTCCGTTGCACTCTTTGCAAGCATTACCGCTTGTGGTGCTTTCGGTGGTCTGCCAAGC CTAAAAAGCTCTTTTGTTCTGAGCGAGGACACAATCCCAGGGACAAACGAAACCGTAAAA ACGTTACTTCCCTACGGATCTGTGATCAACTATTACGGATACGTAAAGCCAGGACAAGCG CCGGACGGTTTAGTCGATGGAAACAAAAAAGCATACTATCTCTATGTTTGGATTCCTGCC GTAATCGCTGAAATGGGAGTTCGTATGATTTCCCCAACAGGCGAAATCGGTGAGCCAGGC GACGGAGACTTAGTAAGCGACGCTTTCAAAGCGGCTACCCCAGAAGAAAAATCAATGCCA CATTGGTTTGATACTTGGATCCGTGTAGAAAGA…	GGAAATTGCGCAGCTACAGTCGATGTAGAATATCCGGTATTCCCGAAAGATAAAGAAGGC CGTGCACTTCAGAAATTCCTCGGAACCATTCGTAACGTAGGTTTGGCTGTTGAAGCTCCT AAAAAAAGTCTTTGGGAAGCAATTTTCGGTGAAGGTTCCAGCTTTATCGATCAGATGCCT TCTAAAGTTTTCGAGGCGTTTGACAAAGAATCTTATTACAAACTTACCGACCTGAGTAAA CGTGCAGACGCAATCAACGAAGCAAGTCTTTCTCTTACAGGAATCACTAAAAATAGAGCG AAGATCGGAAATCTGATTGGAGCGGAAGCAATTCTATACATAGGTTACCAAAAACCTTAT ACAGAGTGTAGTACTGAAAATAAAATCGATGCA…	CACGTGGGTAATCTTCCTCCGAGTCTGGGATAACTTTCCGAAAGGGGAGCTAATACTGGA TAGTCCCGATAGATCATAGGATGTATCGGGTAAAGATTCATTGCTCGGAGATGAGCCCGC GTCCGATTAGCTAGTTGGTGAGGTAAAGGCTCACCAAGGCGACGATCGGTAGCCGGCCTG AGAGGGTGTTCGGCCACAATGGAACTGAGACACGGTCCATACTCCTACGGGAGGCAGCAG TTAAGAATCTTGCTCAATGGGGGGAACCCTGAAGCAGCGACGCCGCGTGAACGATGAAGG TCTTCGGATTGTAAAGTTCAATAAGCAGGGAAAAATAAGCAGCGATGTGATGATGGTACC TGCCTAAAGCACCGGCTAACTACGTGCCAGCAG…	ATGCCGATCATTTTTGCTTCGTCTTTGATTTTATTTCCTCAGACGATTATTCAATGGTTA TCTAATAGTAGTCAAGAATGGGCTGGATGGGCAGTGATTATGGATTTTTTTAATCCATTC TCTCAGATTTGGTATCATGCGTTATTTTATTTCGTAATTTATACCGCTTTAATTGTATTC TTTGCTTACTTCTATACAGCGATTCAGTTTAATCCTGCAGAATTGGCTGAGAATTTGAAA AAATACGGTGGGTTCATTCCAGGAATTCGTCCGGGTTCTCACACAAAAGAATACATTGAA AAAGTGTTAAATAGAATCACTCTTCCCGGAGCTATGTTTCTTGCAGGTTTGGCATTAGCA CCTTATATTATTATAAAATTCTTAGATTTGAGT…
108	VC18	L.interrogans	Andaman/India	Human clinical	CTTTCTATTCCTCAGATTTCTACAGGAGATATTTTACGCGAGGCAGTAAAGAATCAAACT GCGATGGGAATAGAAGCAAAACGTTATATGGATGCGGGAGACTTGGTTCCAGATTCCGTA GTGATTGGAATCATAAAAGATCGCATTCGAGAAGCGGATTGTAAAAATGGATTTTTGTTG GATGGATTTCCGAGAACCGTGGAACAAGCGGAAGCTTTAGATACACTTTTAAAAAATGAA GGCAAGTCTATTGATAAAGCGATTAATCTTCAGGTTCCGGATGCGGAACTCTTAAAGAGA TTACTCGGCCGTGCAGAAATAGAAGGTCGCGCGGACGATAACGAAGTGACGATTAAAAAT CGTCTCGATAATTATAATAAGAAGACCTTACCT…	TATCTCGATATAGAACTGGATTATTATGATTTAGGCGTGGAGTACAGGGACAAAACGGAT GATAAAGTAACCGTGGATTCTGCTCACGCGATTCAAAAATATGGAGTAGGCGTAAAATGT GCGACGATTACTCCTAACCAAGATAGAGTTAAAGAATACAATCTCAAACAAGAATGGAAA TCTCCGAACGGAACCATTCGTTCTATTTTAGACGGAACCGTTTTTCGTAAACCGATCATC GTAAAAAATATTCCTCCTGCGGTTCGTTCTTGGAAAAAACCGATTACAGTAGGACGTCAC GCTTACGGAGATCTTTATAAGGACACAGAACTTTATATTCCCGAAGCCGGAAAGGTGGAA CTCGTTTATACCGGAAAGGACGGAAAAGAAAAA…	ATCTCCGTTGCACTCTTTGCAAGCATTACCGCTTGTGGTGCTTTCGGTGGTCTGCCAAGC CTAAAAAGCTCTTTTGTTCTGAGCGAGGACACAATCCCAGGGACAAACGAAACCGTAAAA ACGTTACTTCCCTACGGATCTGTGATCAACTATTACGGATACGTAAAGCCAGGACAAGCG CCGGACGGTTTAGTCGATGGAAACAAAAAAGCATACTATCTCTATGTTTGGATTCCTGCC GTAATCGCTGAAATGGGAGTTCGTATGATTTCCCCAACAGGCGAAATCGGTGAACCAGGC GACGGAGACTTAGTAAGCGACGCTTTCAAAGCGGCTACCCCAGAAGAAAAATCAATGCCA CATTGGTTTGATACTTGGATCCGTGTAGAAAGA…	GGAAATTGCGCAGCTACAGTCGATGTAGAATATCCGGTATTCCCGAAAGATAAAGAAGGC CGTGCACTTCAGAAATTCCTCGGAACCATTCGTAACGTAGGTTTGGCCGTTGAAGCTCCT AAAAAAAGTCTTTGGGAAGCAATTTTCGGTGAAGGTTCCAGCTTTATCGATCAGATGCCT TCTAAAGTTTTCGAGGCGTTTGACAAAGAATCTTATTACAAACTTACCGACCTAAGCAAA CGTGCAGACGCAATCAACGAAGCAAGTCTTTCTCTTACAGGAATCACTAAAAATAGAGCG AAGATCGGAAATCTGATTGGAGCGGAAGCAATTCTATACATAGGTTACCAAAAACCTTAT ACAGAGTGTAGTACTGAAAATAAAATCGATGCG…	CACGTGGGTAATCTTCCTCCGAGTCTGGGATAACTTTCCGAAAGGGGAGCTAATACTGGA TAGTCCCGATAGATCATAGGATGTATCGGGTAAAGATTCATTGCTCGGAGATGAGCCCGC GTCCGATTAGCTAGTTGGTGAGGTAAAGGCTCACCAAGGCGACGATCGGTAGCCGGCCTG AGAGGGTGTTCGGCCACAATGGAACTGAGACACGGTCCATACTCCTACGGGAGGCAGCAG TTAAGAATCTTGCTCAATGGGGGGAACCCTGAAGCAGCGACGCCGCGTGAACGATGAAGG TCTTCGGATTGTAAAGTTCAATAAGCAGGGAAAAATAAGCAGCGATGTGATGATGGTACC TGCCTAAAGCACCGGCTAACTACGTGCCAGCAG…	ATGCCGATCATTTTTGCTTCGTCTTTGATTTTATTTCCTCAGACGATTATTCAATGGTTA TCTAATAGTAGTCAAGAATGGGCTGGATGGGCAGTGATTATGGATTTTTTTAATCCATTC TCTCAGATTTGGTATCATGCGTTATTTTATTTCGTAATTTATACCGCTTTAATTGTATTC TTTGCTTACTTTTATACAGCGATTCAGTTTAATCCTGCAGAATTGGCTGAGAATTTGAAA AAATACGGTGGATTCATTCCAGGAATTCGTCCGGGTTCTCACACAAAAGAATATATTGAA AAAGTGTTAAATAGAATCACTCTTCCCGGAGCTATGTTTCTTGCAGGTTTGGCATTAGCA CCTTATATTATTATAAAATTCTTAGATTTGAGC…
109	VC19	L.interrogans	Andaman/India	Human clinical	CTTTCTATTCCTCAGATTTCTACAGGAGATATTTTACGCGAGGCAGTAAAGAATCAAACT GCGATGGGAATAGAAGCAAAACGTTATATGGATGCGGGAGACTTGGTTCCAGATTCCGTA GTGATTGGAATCATAAAAGATCGCATTCGAGAAGCGGATTGTAAAAATGGATTTTTGTTG GATGGATTTCCGAGAACCGTGGAACAAGCGGAAGCTTTAGATACACTTTTAAAAAATGAA GGCAAGTCTATTGATAAAGCGATTAATCTTCAGGTTCCGGATGCGGAACTCTTAAAGAGA TTACTCGGCCGTGCAGAAATAGAAGGTCGCGCGGACGATAACGAAGTGACGATTAAAAAT CGTCTCGATAATTATAATAAGAAGACCTTACCT…	TATCTCGATATAGAACTGGATTATTATGATTTAGGCGTGGAGTACAGGGACAAAACGGAT GATAAAGTAACCGTGGATTCTGCTCACGCGATTCAAAAATATGGAGTAGGCGTAAAATGT GCGACGATTACTCCTAACCAAGATAGAGTTAAAGAATACAATCTCAAACAAGAATGGAAA TCTCCGAACGGAACCATTCGTTCTATTTTAGACGGAACCGTTTTTCGTAAACCGATCATC GTAAAAAATATTCCTCCTGCGGTTCGTTCTTGGAAAAAACCGATTACAGTAGGACGTCAC GCTTACGGAGATCTTTATAAGGACACAGAACTTTATATTCCCGAAGCCGGAAAGGTGGAA CTCGTTTATACCGGAAAGGACGGAAAAGAAAAA…	ATCTCCGTTGCACTCTTTGCAAGCATTACCGCTTGTGGTGCTTTCGGTGGTCTGCCAAGC CTAAAAAGCTCTTTTGTTCTGAGCGAGGACACAATCCCAGGGACAAACGAAACCGTAAAA ACGTTACTTCCCTACGGATCTGTGATCAACTATTACGGATACGTAAAGCCAGGACAAGCG CCGGACGGTTTAGTCGATGGAAACAAAAAAGCATACTATCTCTATGTTTGGATTCCTGCC GTAATCGCTGAAATGGGAGTTCGTATGATTTCCCCAACAGGCGAAATCGGTGAACCAGGC GACGGAGACTTAGTAAGCGACGCTTTCAAAGCGGCTACCCCAGAAGAAAAATCAATGCCA CATTGGTTTGATACTTGGATCCGTGTAGAAAGA…	GGAAATTGCGCAGCTACAGTCGATGTAGAATATCCGGTATTCCCGAAAGATAAAGAAGGC CGTGCACTTCAGAAATTCCTCGGAACCATTCGTAACGTAGGTTTGGCCGTTGAAGCTCCT AAAAAAAGTCTTTGGGAAGCAATTTTCGGTGAAGGTTCCAGCTTTATCGATCAGATGCCT TCTAAAGTTTTCGAGGCGTTTGACAAAGAATCTTATTACAAACTTACCGACCTAAGCAAA CGTGCAGACGCAATCAACGAAGCAAGTCTTTCTCTTACAGGAATCACTAAAAATAGAGCG AAGATCGGAAATCTGATTGGAGCGGAAGCAATTCTATACATAGGTTACCAAAAACCTTAT ACAGAGTGTAGTACTGAAAATAAAATCGATGCG…	CACGTGGGTAATCTTCCTCCGAGTCTGGGATAACTTTCCGAAAGGGGAGCTAATACTGGA TAGTCCCGATAGATCATAGGATGTATCGGGTAAAGATTCATTGCTCGGAGATGAGCCCGC GTCCGATTAGCTAGTTGGTGAGGTAAAGGCTCACCAAGGCGACGATCGGTAGCCGGCCTG AGAGGGTGTTCGGCCACAATGGAACTGAGACACGGTCCATACTCCTACGGGAGGCAGCAG TTAAGAATCTTGCTCAATGGGGGGAACCCTGAAGCAGCGACGCCGCGTGAACGATGAAGG TCTTCGGATTGTAAAGTTCAATAAGCAGGGAAAAATAAGCAGCGATGTGATGATGGTACC TGCCTAAAGCACCGGCTAACTACGTGCCAGCAG…	ATGCCGATCATTTTTGCTTCGTCTTTGATTTTATTTCCTCAGACGATTATTCAATGGTTA TCTAATAGTAGTCAAGAATGGGCTGGATGGGCAGTGATTATGGATTTTTTTAATCCATTC TCTCAGATTTGGTATCATGCGTTATTTTATTTCGTAATTTATACCGCTTTAATTGTATTC TTTGCTTACTTTTATACAGCGATTCAGTTTAATCCTGCAGAATTGGCTGAGAATTTGAAA AAATACGGTGGATTCATTCCAGGAATTCGTCCGGGTTCTCACACAAAAGAATATATTGAA AAAGTGTTAAATAGAATCACTCTTCCCGGAGCTATGTTTCTTGCAGGTTTGGCATTAGCA CCTTATATTATTATAAAATTCTTAGATTTGAGC…
110	VC20	L.interrogans	Andaman/India	Human clinical	CTTTCTATTCCTCAGATTTCTACAGGAGATATTTTACGCGAGGCAGTAAAGAATCAAACT GCGATGGGAATAGAAGCAAAACGTTATATGGATGCGGGAGACTTGGTTCCAGATTCCGTA GTGATTGGAATCATAAAAGATCGCATTCGAGAAGCGGATTGTAAAAATGGATTTTTGTTG GATGGATTTCCGAGAACCGTGGAACAAGCGGAAGCTTTAGATACACTTTTAAAAAATGAA GGCAAGTCTATTGATAAAGCGATTAATCTTCAGGTTCCGGATGCGGAACTCTTAAAGAGA TTACTCGGCCGTGCAGAAATAGAAGGTCGCGCGGACGATAACGAAGTGACGATTAAAAAT CGTCTCGATAATTATAATAAGAAGACCTTACCT…	TATCTCGATATAGAACTGGATTATTATGATTTAGGCGTGGAGTACAGGGACAAAACGGAT GATAAAGTAACCGTGGATTCTGCTCACGCGATTCAAAAATATGGAGTAGGCGTAAAATGT GCGACGATTACTCCTAACCAAGATAGAGTTAAAGAATACAATCTCAAACAAGAATGGAAA TCTCCGAACGGAACCATTCGTTCTATTTTAGACGGAACCGTTTTTCGTAAACCGATCATC GTAAAAAATATTCCTCCTGCGGTTCGTTCTTGGAAAAAACCGATTACAGTAGGACGTCAC GCTTACGGAGATCTTTATAAGGACACAGAACTTTATATTCCCGAAGCCGGAAAGGTGGAA CTCGTTTATACCGGAAAGGACGGAAAAGAAAAA…	ATCTCCGTTGCACTCTTTGCAAGCATTACCGCTTGTGGTGCTTTCGGTGGTCTGCCAAGC CTAAAAAGCTCTTTTGTTCTGAGCGAGGACACAATCCCAGGGACAAACGAAACCGTAAAA ACGTTACTTCCCTACGGATCTGTGATCAACTATTACGGATACGTAAAGCCAGGACAAGCG CCGGACGGTTTAGTCGATGGAAACAAAAAAGCATACTATCTCTATGTTTGGATTCCTGCC GTAATCGCTGAAATGGGAGTTCGTATGATTTCCCCAACAGGCGAAATCGGTGAACCAGGC GACGGAGACTTAGTAAGCGACGCTTTCAAAGCGGCTACCCCAGAAGAAAAATCAATGCCA CATTGGTTTGATACTTGGATCCGTGTAGAAAGA…	GGAAATTGCGCAGCTACAGTCGATGTAGAATATCCGGTATTCCCGAAAGATAAAGAAGGC CGTGCACTTCAGAAATTCCTCGGAACCATTCGTAACGTAGGTTTGGCCGTTGAAGCTCCT AAAAAAAGTCTTTGGGAAGCAATTTTCGGTGAAGGTTCCAGCTTTATCGATCAGATGCCT TCTAAAGTTTTCGAGGCGTTTGACAAAGAATCTTATTACAAACTTACCGACCTAAGCAAA CGTGCAGACGCAATCAACGAAGCAAGTCTTTCTCTTACAGGAATCACTAAAAATAGAGCG AAGATCGGAAATCTGATTGGAGCGGAAGCAATTCTATACATAGGTTACCAAAAACCTTAT ACAGAGTGTAGTACTGAAAATAAAATCGATGCG…	CACGTGGGTAATCTTCCTCCGAGTCTGGGATAACTTTCCGAAAGGGGAGCTAATACTGGA TAGTCCCGATAGATCATAGGATGTATCGGGTAAAGATTCATTGCTCGGAGATGAGCCCGC GTCCGATTAGCTAGTTGGTGAGGTAAAGGCTCACCAAGGCGACGATCGGTAGCCGGCCTG AGAGGGTGTTCGGCCACAATGGAACTGAGACACGGTCCATACTCCTACGGGAGGCAGCAG TTAAGAATCTTGCTCAATGGGGGGAACCCTGAAGCAGCGACGCCGCGTGAACGATGAAGG TCTTCGGATTGTAAAGTTCAATAAGCAGGGAAAAATAAGCAGCGATGTGATGATGGTACC TGCCTAAAGCACCGGCTAACTACGTGCCAGCAG…	ATGCCGATCATTTTTGCTTCGTCTTTGATTTTATTTCCTCAGACGATTATTCAATGGTTA TCTAATAGTAGTCAAGAATGGGCTGGATGGGCAGTGATTATGGATTTTTTTAATCCATTC TCTCAGATTTGGTATCATGCGTTATTTTATTTCGTAATTTATACCGCTTTAATTGTATTC TTTGCTTACTTTTATACAGCGATTCAGTTTAATCCTGCAGAATTGGCTGAGAATTTGAAA AAATACGGTGGATTCATTCCAGGAATTCGTCCGGGTTCTCACACAAAAGAATATATTGAA AAAGTGTTAAATAGAATCACTCTTCCCGGAGCTATGTTTCTTGCAGGTTTGGCATTAGCA CCTTATATTATTATAAAATTCTTAGATTTGAGC…
111	VC21	L.interrogans	Andaman/India	Human clinical	CTTTCTATTCCTCAGATTTCTACAGGAGATATTTTACGCGAGGCAGTAAAGAATCAAACT GCGATGGGAATAGAAGCAAAACGTTATATGGATGCGGGAGATTTGGTTCCAGATTCCGTA GTGATTGGAATCATAAAAGATCGCATTCGAGAAGCGGATTGTAAAAATGGATTTTTGTTG GATGGATTTCCGAGAACCGTGGAACAAGCGGAAGCTTTAGATACACTTTTAAAAAATGAA GGCAAGTCTATTGATAAAGCGATTAATCTTCAGGTTCCGGATGCGGAACTCTTAAAGAGA TTACTCGGCCGTGCAGAAATAGAAGGTCGCGCGGACGATAACGAAGTGACGATTAAAAAT CGTCTCGATAATTATAATAAGAAGACCTTACCT…	TATCTCGATATAGAACTGGATTATTATGATTTAGGCGTGGAGTACAGGGACAAAACGGAT GATAAAGTAACCGTGGATTCTGCTCACGCGATTCAAAAATATGGAGTAGGCGTAAAATGT GCGACGATTACTCCTAACCAAGATAGAGTTAAAGAATACAATCTCAAACAAGAATGGAAA TCTCCGAACGGAACCATTCGTTCTATTTTAGACGGAACCGTTTTTCGTAAACCGATCATC GTAAAAAATATTCCTCCTGCGGTTCGTTCTTGGAAAAAACCGATTACAGTAGGACGTCAC GCTTACGGAGATCTTTATAAGGACACAGAACTTTATATTCCCGAAGCCGGAAAGGTGGAA CTCGTTTATACCGGAAAGGACGGAAAAGAAAAA…	ATCTCCGTTGCACTCTTTGCAAGCATTACCGCTTGTGGTGCTTTCGGTGGTCTGCCAAGC CTAAAAAGCTCTTTTGTTCTGAGCGAGGACACAATCCCAGGGACAAACGAAACCGTAAAA ACGTTACTTCCCTACGGATCTGTGATCAACTATTACGGATACGTAAAGCCAGGACAAGCG CCGGACGGTTTAGTCGATGGAAACAAAAAAGCATACTATCTCTATGTTTGGATTCCTGCC GTAATCGCTGAAATGGGAGTTCGTATGATTTCCCCAACAGGCGAAATCGGTGAACCAGGC GACGGAGACTTAGTAAGCGACGCTTTCAAAGCGGCTACCCCAGAAGAAAAATCAATGCCA CATTGGTTTGATACTTGGATCCGTGTAGAAAGA…	GGAAATTGCGCAGCTACAGTCGATGTAGAATATCCGGTATTCCCGAAAGATAAAGAAGGC CGTGCACTTCAGAAATTCCTCGGAACCATTCGTAACGTAGGTTTGGCCGTTGAAGCTCCT AAAAAAAGTCTTTGGGAAGCAATTTTCGGTGAAGGTTCCAGCTTTATCGATCAGATGCCT TCTAAAGTTTTCGAGGCGTTTGACAAAGAATCTTATTACAAACTTACCGACCTAAGCAAA CGTGCAGACGCAATCAACGAAGCAAGTCTTTCTCTTACAGGAATCACTAAAAATAGAGCG AAGATCGGAAATCTGATTGGAGCGGAAGCAATTCTATACATAGGTTACCAAAAACCTTAT ACAGAGTGTAGTACTGAAAATAAAATCGATGCG…	CACGTGGGTAATCTTCCTCTGAGTCTGGGATAACTTTCCGAAAGGGAAGCTAATACTGGA TGGTCCCGAGAGATCATAAGATTTTTCGGGTAAAGATTTATTGCTCGGAGATGAGCCCGC GTCCGATTAGCTAGTTGGTGAGGTAAAGGCTCACCAAGGCGACGATCGGTAGCCGGCCTG AGAGGGTGTTCGGCCACAATGGAACTGAGACACGGTCCATACTCCTACGGGAGGCAGCAG TTAAGAATCTTGCTCAATGGGGGGAACCCTGAAGCAGCGACGCCGCGTGAACGATGAAGG TCTTCGGATTGTAAAGTTCAGTAAGCAGGGAAAAATAAGCAGCAATGTGATGATGGTACC TGCCTAAAGCACCGGCTAACTACGTGCCAGCAG…	ATGCCGATCATTTTTGCTTCGTCTTTGATTTTATTTCCTCAGACGATTATTCAATGGTTA TCTAATAGTAGTCAAGAATGGGCTGGATGGGCAGTGATTATGGATTTTTTTAATCCATTC TCTCAGATTTGGTATCATGCGTTATTTTATTTCGTAATTTATACCGCTTTAATTGTATTC TTTGCTTACTTTTATACAGCGATTCAGTTTAATCCTGCAGAATTGGCTGAGAATTTGAAA AAATACGGTGGATTCATTCCAGGAATTCGTCCGGGTTCTCACACAAAAGAATATATTGAA AAAGTGTTAAATAGAATCACTCTTCCCGGAGCTATGTTTCTTGCAGGTTTGGCATTAGCA CCTTATATTATTATAAAATTCTTAGATTTGAGC…
112	VC22	L.interrogans	Andaman/India	Human clinical	CTTTCTATTCCTCAGATTTCTACAGGAGATATTTTACGCGAGGCAGTAAAGAATCAAACT GCGATGGGAATAGAAGCAAAACGTTATATGGATGCGGGAGATTTGGTTCCAGATTCCGTA GTGATTGGAATCATAAAAGATCGCATTCGAGAAGCGGATTGTAAAAATGGATTTTTGTTG GATGGATTTCCGAGAACCGTGGAACAAGCGGAAGCTTTAGATACACTTTTAAAAAATGAA GGCAAGTCTATTGATAAAGCGATTAATCTTCAGGTTCCGGATGCGGAACTCTTAAAGAGA TTACTCGGCCGTGCAGAAATAGAAGGTCGCGCGGACGATAACGAAGTGACGATTAAAAAT CGTCTCGATAATTATAATAAGAAGACCTTACCT…	TATCTCGATATAGAACTGGATTATTATGATTTAGGCGTGGAGTACAGGGACAAAACGGAT GATAAAGTAACCGTGGATTCTGCTCACGCGATTCAAAAATATGGAGTAGGCGTAAAATGT GCGACGATTACTCCTAACCAAGATAGAGTTAAAGAATACAATCTCAAACAAGAATGGAAA TCTCCGAACGGAACCATTCGTTCTATTTTAGACGGAACCGTTTTTCGTAAACCGATCATC GTAAAAAATATTCCTCCTGCGGTTCGTTCTTGGAAAAAACCGATTACAGTAGGACGTCAC GCTTACGGAGATCTTTATAAGGACACAGAACTTTATATTCCCGAAGCCGGAAAGGTGGAA CTCGTTTATACCGGAAAGGACGGAAAAGAAAAA…	ATCTCCGTTGCACTCTTTGCAAGCATTACCGCTTGTGGTGCTTTCGGTGGTCTGCCAAGC CTAAAAAGCTCTTTTGTTCTGAGCGAGGACACAATCCCAGGGACAAACGAAACCGTAAAA ACGTTACTTCCCTACGGATCTGTGATCAACTATTACGGATACGTAAAGCCAGGACAAGCG CCGGACGGTTTAGTCGATGGAAACAAAAAAGCATACTATCTCTATGTTTGGATTCCTGCC GTAATCGCTGAAATGGGAGTTCGTATGATTTCCCCAACAGGCGAAATCGGTGAGCCAGGC GACGGAGACTTAGTAAGCGACGCTTTCAAAGCGGCTACCCCAGAAGAAAAATCAATGCCA CATTGGTTTGATACTTGGATCCGTGTAGAAAGA…	GGAAATTGCGCAGCTACAGTCGATGTAGAATATCCGGTATTCCCGAAAGATAAAGAAGGC CGTGCACTTCAGAAATTCCTCGGAACCATTCGTAACGTAGGTTTGGCTGTTGAAGCTCCT AAAAAAAGTCTTTGGGAAGCAATTTTCGGTGAAGGTTCCAGCTTTATCGATCAGATGCCT TCTAAAGTTTTCGAGGCGTTTGACAAAGAATCTTATTACAAACTTACCGACCTGAGTAAA CGTGCAGACGCAATCAACGAAGCAAGTCTTTCTCTTACAGGAATCACTAAAAATAGAGCG AAGATCGGAAATCTGATTGGAGCGGAAGCAATTCTATACATAGGTTACCAAAAACCTTAT ACAGAGTGTAGTACTGAAAATAAAATCGATGCA…	CACGTGCGTAATCTTCCTCTGAGTCTGGGATAACTTTCCGAAAGGGAAGCTAATACTGGA TGGTCCCGAGAGATCATAAGATTTTTCGGGTAAAGATTTATTGCTCGGAGATGAGCCCGC GTCCGATTAGCTAGTTGGTGAGGTAAAGGCTCACCAAGGCGACGATCGGTAGCCGGCCTG AGAGGGTGTTCGGCCACAATGGAACTGAGACACGGTCCATACTCCTACGGGAGGCAGCAG TTAAGAATCTTGCTCAATGGGGGGAACCCTGAAGCAGCGACGCCGCGTGAACGATGAAGG TCTTCGGATTGTAAAGTTCAGTAAGCAGGGAAAAATAAGCAGCAATGTGATGATGGTACC TGCCTAAAGCACCGGCTAACTACGTGCCAGCAG…	ATGCCGATCATTTTTGCTTCGTCTTTGATTTTATTTCCTCAGACGATTATTCAATGGTTA TCTAATAGTAGTCAAGAATGGGCTGGATGGGCAGTGATTATGGATTTTTTTAATCCATTC TCTCAGATTTGGTATCATGCGTTATTTTATTTCGTAATTTATACCGCTTTAATTGTATTC TTTGCTTACTTTTATACAGCGATTCAGTTTAATCCTGCAGAATTGGCTGAGAATTTGAAA AAATACGGTGGATTCATTCCAGGAATTCGTCCGGGTTCTCACACAAAAGAATATATTGAA AAAGTGTTAAATAGAATCACTCTTCCCGGAGCTATGTTTCTTGCAGGTTTGGCATTAGCA CCTTATATTATTATAAAATTCTTAGATTTGAGC…
113	VC23	L.interrogans	Andaman/India	Human clinical	CTTTCTATTCCTCAGATTTCTACAGGAGATATTTTACGCGAGGCAGTAAAGAATCAAACT GCGATGGGAATAGAAGCAAAACGTTATATGGATGCGGGAGACTTGGTTCCAGATTCCGTA GTGATTGGAATCATAAAAGATCGCATTCGAGAAGCGGATTGTAAAAATGGATTTTTGTTG GATGGATTTCCGAGAACCGTGGAACAAGCGGAAGCTTTAGATACACTTTTAAAAAATGAA GGCAAGTCTATTGATAAAGCGATTAATCTTCAGGTTCCGGATGCGGAACTCTTAAAGAGA TTACTCGGCCGTGCAGAAATAGAAGGTCGCGCGGACGATAACGAAGTGACGATTAAAAAT CGTCTCGATAATTATAATAAGAAGACCTTACCT…	TATCTCGATATAGAACTGGATTATTATGATTTAGGCGTGGAGTACAGGGACAAAACGGAT GATAAAGTAACCGTGGATTCTGCTCACGCGATTCAAAAATATGGAGTAGGCGTAAAATGT GCGACGATTACTCCTAACCAAGATAGAGTTAAAGAATACAATCTCAAACAAGAATGGAAA TCTCCGAACGGAACCATTCGTTCTATTTTAGACGGAACCGTTTTTCGTAAACCGATCATC GTAAAAAATATTCCTCCTGCGGTTCGTTCTTGGAAAAAACCGATTACAGTAGGACGTCAC GCTTACGGAGATCTTTATAAGGACACAGAACTTTATATTCCCGAAGCCGGAAAGGTGGAA CTCGTTTATACCGGAAAGGACGGAAAAGAAAAA…	ATCTCCGTTGCACTCTTTGCAAGCATTACCGCTTGTGGTGCTTTCGGTGGTCTGCCAAGC CTAAAAAGCTCTTTTGTTCTGAGCGAGGACACAATCCCAGGGACAAACGAAACCGTAAAA ACGTTACTTCCCTACGGATCTGTGATCAACTATTACGGATACGTAAAGCCAGGACAAGCG CCGGACGGTTTAGTCGATGGAAACAAAAAAGCATACTATCTCTATGTTTGGATTCCTGCC GTAATCGCTGAAATGGGAGTTCGTATGATTTCCCCAACAGGCGAAATCGGTGAACCAGGC GACGGAGACTTAGTAAGCGACGCTTTCAAAGCGGCTACCCCAGAAGAAAAATCAATGCCA CATTGGTTTGATACTTGGATCCGTGTAGAAAGA…	GGAAATTGCGCAGCTACAGTCGATGTAGAATATCCGGTATTCCCGAAAGATAAAGAAGGC CGTGCACTTCAGAAATTCCTCGGAACCATTCGTAACGTAGGTTTGGCCGTTGAAGCTCCT AAAAAAAGTCTTTGGGAAGCAATTTTCGGTGAAGGTTCCAGCTTTATCGATCAGATGCCT TCTAAAGTTTTCGAGGCGTTTGACAAAGAATCTTATTACAAACTTACCGACCTAAGCAAA CGTGCAGACGCAATCAACGAAGCAAGTCTTTCTCTTACAGGAATCACTAAAAATAGAGCG AAGATCGGAAATCTGATTGGAGCGGAAGCAATTCTATACATAGGTTACCAAAAACCTTAT ACAGAGTGTAGTACTGAAAATAAAATCGATGCG…	CACGTGCGTAATCTTCCTCTGAGTCTGGGATAACTTTCCGAAAGGGAAGCTAATACTGGA TGGTCCCGAGAGATCATAAGATTTTTCGGGTAAAGATTTATTGCTCGGAGATGAGCCCGC GTCCGATTAGCTAGTTGGTGAGGTAAAGGCTCACCAAGGCGACGATCGGTAGCCGGCCTG AGAGGGTGTTCGGCCACAATGGAACTGAGACACGGTCCATACTCCTACGGGAGGCAGCAG TTAAGAATCTTGCTCAATGGGGGGAACCCTGAAGCAGCGACGCCGCGTGAACGATGAAGG TCTTCGGATTGTAAAGTTCAGTAAGCAGGGAAAAATAAGCAGCAATGTGATGATGGTACC TGCCTAAAGCACCGGCTAACTACGTGCCAGCAG…	ATGCCGATCATTTTTGCTTCGTCTTTGATTTTATTTCCTCAGACGATTATTCAATGGTTA TCTAATAGTAGTCAAGAATGGGCTGGATGGGCAGTGATTATGGATTTTTTTAATCCATTC TCTCAGATTTGGTATCATGCGTTATTTTATTTCGTAATTTATACCGCTTTAATTGTATTC TTTGCTTACTTTTATACAGCGATTCAGTTTAATCCTGCAGAATTGGCTGAGAATTTGAAA AAATACGGTGGATTCATTCCAGGAATTCGTCCGGGTTCTCACACAAAAGAATATATTGAA AAAGTGTTAAATAGAATCACTCTTCCCGGAGCTATGTTTCTTGCAGGTTTGGCATTAGCA CCTTATATTATTATAAAATTCTTAGATTTGAGC…
114	VC24	L.interrogans	South India(KR)	Human clinical	CTTTCTATTCCTCAGATTTCTACAGGAGATATTTTACGCGAGGCAGTAAAGAATCAAACT GCGATGGGAATAGAAGCAAAACGTTATATGGATGCGGGAGATTTGGTTCCAGATTCCGTA GTGATTGGAATCATAAAAGATCGCATTCGAGAAGCGGATTGTAAAAATGGATTTTTGTTG GATGGATTTCCGAGAACCGTGGAACAAGCGGAAGCTTTAGATACACTTTTAAAAAATGAA GGCAAGTCTATTGATAAAGCGATTAATCTTCAGGTTCCGGATGCGGAACTCTTAAAGAGA TTACTCGGCCGTGCAGAAATAGAAGGTCGCGCGGACGATAACGAAGTGACGATTAAAAAT CGTCTCGATAATTATAATAAGAAGACCTTACCT…	TATCTCGATATAGAACTGGATTATTATGATTTAGGCGTGGAGTACAGGGACAAAACGGAT GATAAAGTAACCGTGGATTCTGCTCACGCGATTCAAAAATATGGAGTAGGCGTAAAATGT GCGACGATTACTCCTAACCAAGATAGAGTTAAAGAATACAATCTCAAACAAGAATGGAAA TCTCCGAACGGAACCATTCGTTCTATTTTAGACGGAACCGTTTTTCGTAAACCGATCATC GTAAAAAATATTCCTCCTGCGGTTCGTTCTTGGAAAAAACCGATTACAGTAGGACGTCAC GCTTACGGAGATCTTTATAAGGACACAGAACTTTATATTCCCGAAGCCGGAAAGGTGGAA CTCGTTTATACCGGAAAGGACGGAAAAGAAAAA…	ATCTCCGTTGCACTCTTTGCAAGCATTACCGCTTGTGGTGCTTTCGGTGGTCTGCCAAGC CTAAAAAGCTCTTTTGTTCTGAGCGAGGACACAATCCCAGGGACAAACGAAACCGTAAAA ACGTTACTTCCCTACGGATCTGTGATCAACTATTACGGATACGTAAAGCCAGGACAAGCG CCGGACGGTTTAGTCGATGGAAACAAAAAAGCATACTATCTCTATGTTTGGATTCCTGCC GTAATCGCTGAAATGGGAGTTCGTATGATTTCCCCAACAGGCGAAATCGGTGAGCCAGGC GACGGAGACTTAGTAAGCGACGCTTTCAAAGCGGCTACCCCAGAAGAAAAATCAATGCCA CATTGGTTTGATACTTGGATCCGTGTAGAAAGA…	GGAAATTGCGCAGCTACAGTCGATGTAGAATATCCGGTATTCCCGAAAGATAAAGAAGGC CGTGCACTTCAGAAATTCCTCGGAACCATTCGTAACGTAGGTTTGGCTGTTGAAGCTCCT AAAAAAAGTCTTTGGGAAGCAATTTTCGGTGAAGGTTCCAGCTTTATCGATCAGATGCCT TCTAAAGTTTTCGAGGCGTTTGACAAAGAATCTTATTACAAACTTACCGACCTGAGTAAA CGTGCAGACGCAATCAACGAAGCAAGTCTTTCTCTTACAGGAATCACTAAAAATAGAGCG AAGATCGGAAATCTGATTGGAGCGGAAGCAATTCTATACATAGGTTACCAAAAACCTTAT ACAGAGTGTAGTACTGAAAATAAAATCGATGCA…	CACGTGGGTAATCTTCCTCTGAGTCTGGGATAACTTTCCGAAAGGGAAGCTAATACTGGA TGGTCCCGAGAGATCATAAGATTTTTCGGGTAAAGATTTATTGCTCGGAGATGAGCCCGC GTCCGATTAGCTAGTTGGTGAGGTAAAGGCTCACCAAGGCGACGATCGGTAGCCGGCCTG AGAGGGTGTTCGGCCACAATGGAACTGAGACACGGTCCATACTCCTACGGGAGGCAGCAG TTAAGAATCTTGCTCAATGGGGGGAACCCTGAAGCAGCGACGCCGCGTGAACGATGAAGG TCTTCGGATTGTAAAGTTCAGTAAGCAGGGAAAAATAAGCAGCAATGTGATGATGGTACC TGCCTAAAGCACCGGCTAACTACGTGCCAGCAG…	ATGCCGATCATTTTTGCTTCGTCTTTGATTTTATTTCCTCAGACGATTATTCAATGGTTA TCTAATAGTAGTCAAGAATGGGCTGGATGGGCAGTGATTATGGATTTTTTTAATCCATTC TCTCAGATTTGGTATCATGCGTTATTTTATTTCGTAATTTATACCGCTTTAATTGTATTC TTTGCTTACTTCTATACAGCGATTCAGTTTAATCCTGCAGAATTGGCTGAGAATTTGAAA AAATACGGTGGGTTCATTCCAGGAATTCGTCCGGGTTCTCACACAAAAGAATACATTGAA AAAGTGTTAAATAGAATCACTCTTCCCGGAGCTATGTTTCTTGCAGGTTTGGCATTAGCA CCTTATATTATTATAAAATTCTTAGATTTGAGT…
115	VC25	L.interrogans	South India(TN)	Human clinical	CTTTCTATTCCTCAGATTTCTACAGGAGATATTTTACGCGAGGCAGTAAAGAATCAAACT GCGATGGGAATAGAAGCAAAACGTTATATGGATGCGGGAGACTTGGTTCCAGATTCCGTA GTGATTGGAATCATAAAAGATCGCATTCGAGAAGCGGATTGTAAAAATGGATTTTTGTTG GATGGATTTCCGAGAACCGTGGAACAAGCGGAAGCTTTAGATACACTTTTAAAAAATGAA GGCAAGTCTATTGATAAAGCGATTAATCTTCAGGTTCCGGATGCGGAACTCTTAAAGAGA TTACTCGGCCGTGCAGAAATAGAAGGTCGCGCGGACGATAACGAAGTGACGATTAAAAAT CGTCTCGATAATTATAATAAGAAGACCTTACCT…	TATCTCGATATAGAACTGGATTATTATGATTTAGGCGTGGAGTACAGAGACAAAACGGAT GATAAAGTAACTGTGGATTCTGCTCACGCGATTCAAAAATATGGAGTAGGCGTAAAATGT GCGACGATTACTCCTAACCAAGATAGAGTTAAAGAATACAATCTCAAACAAGAATGGAAA TCTCCGAACGGAACCATTCGTTCTATTTTAGACGGAACCGTTTTTCGTAAACCGATCATC GTAAAAAATATTCCTCCTGCGGTTCGTTCTTGGAAAAAACCGATTACAGTAGGACGTCAC GCTTACGGAGATCTTTATAAGGACACAGAACTTTATATTCCCGAAGCCGGAAAGGTGGAA CTCGTTTATACCGGAAAGGACGGAAAAGAAAAA…	ATCTCCGTTGCACTCTTTGCAAGCATTACCGCTTGTGGTGCTTTCGGTGGTCTGCCAAGC CTAAAAAGCTCTTTTGTTCTGAGCGAGGACACAATCCCAGGGACAAACGAAACCGTAAAA ACGTTACTTCCCTACGGATCTGTGATCAACTATTACGGATACGTAAAGCCAGGACAAGCG CCGGACGGTTTAGTCGATGGAAACAAAAAAGCATACTATCTCTATGTTTGGATTCCTGCC GTAATCGCTGAAATGGGAGTTCGTATGATTTCCCCAACAGGCGAAATCGGTGAGCCAGGC GACGGAGACTTAGTAAGCGACGCTTTCAAAGCGGCTACCCCAGAAGAAAAATCAATGCCA CATTGGTTTGATACTTGGATCCGTGTAGAAAGA…	GGAAATTGCGCAGCTACAGTCGATGTAGAATATCCGGTATTCCCGAAAGATAAAGAAGGC CGTGCACTTCAGAAATTCCTCGGAACCATTCGTAACGTAGGTTTGGCTGTTGAAGCTCCT AAAAAAAGTCTTTGGGAAGCAATTTTCGGTGAAGGTTCCAGCTTTATCGATCAGATGCCT TCTAAAGTTTTCGAGGCGTTTGACAAAGAATCTTATTACAAACTTACCGACCTGAGTAAA CGTGCAGACGCAATCAACGAAGCAAGTCTTTCTCTTACAGGAATCACTAAAAATAGAGCG AAGATCGGAAATCTGATTGGAGCGGAAGCAATTCTATACATAGGTTACCAAAAACCTTAT ACAGAGTGTAGTACTGAAAATAAAATCGATGCG…	CACGTGCGTAATCTTCCTCTGAGTCTGGGATAACTTTCCGAAAGGGAAGCTAATACTGGA TGGTCCCGAGAGATCATAAGATTTTTCGGGTAAAGATTTATTGCTCGGAGATGAGCCCGC GTCCGATTAGCTAGTTGGTGAGGTAAAGGCTCACCAAGGCGACGATCGGTAGCCGGCCTG AGAGGGTGTTCGGCCACAATGGAACTGAGACACGGACCATACTCCTACGGGAGGCAGCAG TTAAGAATCTTGCTCAATGGGGGGAACCCTGAAGCAGCGACGCCGCGTGAACGATGAAGG TCTTCGGATTGTAAAGTTCAGTAAGCAGGGAAAAATAAGCAGCAATGTGATGATGGTACC TGCCTAAAGCACCGGCTAACTACGTGCCAGCAG…	ATGCCGATCATTTTTGCTTCGTCTTTGATTTTATTTCCTCAGACGATTATTCAATGGTTA TCTAATAGTAGTCAAGAATGGGCTGGATGGGCAGTGATTATGGATTTTTTTAATCCATTC TCTCAGATTTGGTATCATGCGTTATTTTATTTCGTAATTTATACCGCTTTAATTGTATTC TTTGCTTACTTCTATACAGCGATTCAGTTTAATCCTGCAGAATTGGCTGAGAATTTGAAA AAATACGGTGGGTTCATTCCAGGAATTCGTCCGGGTTCTCACACAAAAGAATACATTGAA AAAGTGTTAAATAGAATCACTCTTCCCGGAGCTATGTTTCTTGCAGGTTTGGCATTAGCA CCTTATATTATTATAAAATTCTTAGATTTGAGT…
116	VC26	L.interrogans	South India(TN)	Human clinical	CTTTCTATTCCTCAGATTTCTACAGGAGATATTTTACGCGAGGCAGTAAAGAATCAAACT GCGATGGGAATAGAAGCAAAACGTTATATGGATGCGGGAGATTTGGTTCCAGATTCCGTA GTGATTGGAATCATAAAAGATCGCATTCGAGAAGCGGATTGTAAAAATGGATTTTTGTTG GATGGATTTCCGAGAACCGTGGAACAAGCGGAAGCTTTAGATACACTTTTAAAAAATGAA GGCAAGTCTATTGATAAAGCGATTAATCTTCAGGTTCCGGATGCGGAACTCTTAAAGAGA TTACTCGGCCGTGCAGAAATAGAAGGTCGCGCGGACGATAACGAAGTGACGATTAAAAAT CGTCTCGATAATTATAATAAGAAGACCTTACCT…	TATCTCGATATAGAACTGGATTATTATGATTTAGGCGTGGAGTACAGGGACAAAACGGAT GATAAAGTAACTGTGGATTCTGCTCACGCGATTCAAAAATATGGAGTAGGCGTAAAATGT GCGACGATTACTCCTAACCAAGATAGAGTTAAAGAATACAATCTCAAACAAGAATGGAAA TCTCCGAACGGAACCATTCGTTCTATTTTAGACGGAACCGTTTTTCGTAAACCGATCATC GTAAAAAATATTCCTCCTGCGGTTCGTTCTTGGAAAAAACCGATTACAGTAGGACGTCAC GCTTACGGAGATCTTTATAAGGACACAGAACTTTATATTCCCGAAGCCGGAAAGGTGGAA CTCGTTTATACCGGAAAGGACGGAAAAGAAAAA…	ATCTCCGTTGCACTCTTTGCAAGCATTACCGCTTGTGGTGCTTTCGGTGGTCTGCCAAGC CTAAAAAGCTCTTTTGTTCTGAGCGAGGACACAATCCCAGGGACAAACGAAACCGTAAAA ACGTTACTTCCCTACGGATCTGTGATCAACTATTACGGATACGTAAAGCCAGGACAAGCG CCGGACGGTTTAGTCGATGGAAACAAAAAAGCATACTATCTCTATGTTTGGATTCCTGCC GTAATCGCTGAAATGGGAGTTCGTATGATTTCCCCAACAGGCGAAATCGGTGAACCAGGC GACGGAGACTTAGTAAGCGACGCTTTCAAAGCGGCTACCCCAGAAGAAAAATCAATGCCA CATTGGTTTGATACTTGGATCCGTGTAGAAAGA…	GGAAATTGCGCAGCTACAGTCGATGTAGAATATCCGGTATTCCCGAAAGATAAAGAAGGC CGTGCACTTCAGAAATTCCTCGGAACCATTCGTAACGTAGGTTTGGCCGTTGAAGCTCCT AAAAAAAGTCTTTGGGAAGCAATTTTCGGTGAAGGTTCCAGCTTTATCGATCAGATGCCT TCTAAAGTTTTCGAGGCGTTTGACAAAGAATCTTATTACAAACTTACCGACCTAAGCAAA CGTGCAGACGCAATCAACGAAGCAAGTCTTTCTCTTACAGGAATCACTAAAAATAGAGCG AAGATCGGAAATCTGATTGGAGCGGAAGCAATTCTATACATAGGTTACCAAAAACCTTAT ACAGAGTGTAGTACTGAAAATAAAATCGATGCG…	CACGTGCGTAATCTTCCTCTGAGTCTGGGATAACTTTCCGAAAGGGAAGCTAATACTGGA TGGTCCCGAGAGATCATAAGATTTTTCGGGTAAAGATTTATTGCTCGGAGATGAGCCCGC GTCCGATTAGCTAGTTGGTGAGGTAAAGGCTCACCAAGGCGACGATCGGTAGCCGGCCTG AGAGGGTGTTCGGCCACAATGGAACTGAGACACGGACCATACTCCTACGGGAGGCAGCAG TTAAGAATCTTGCTCAATGGGGGGAACCCTGAAGCAGCGACGCCGCGTGAACGATGAAGG TCTTCGGATTGTAAAGTTCAGTAAGCAGGGAAAAATAAGCAGCAATGTGATGATGGTACC TGCCTAAAGCACCGGCTAACTACGTGCCAGCAG…	ATGCCGATCATTTTTGCTTCGTCTTTGATTTTATTTCCTCAGACGATTATTCAATGGTTA TCTAATAGTAGTCAAGAATGGGCTGGATGGGCAGTGATTATGGATTTTTTTAATCCATTC TCTCAGATTTGGTATCATGCGTTATTTTATTTCGTAATTTATACCGCTTTAATTGTATTC TTTGCTTACTTCTATACAGCGATTCAGTTTAATCCTGCAGAATTGGCTGAGAATTTGAAA AAATACGGTGGGTTCATTCCAGGAATTCGTCCGGGTTCTCACACAAAAGAATACATTGAA AAAGTGTTAAATAGAATCACTCTTCCCGGAGCTATGTTTCTTGCAGGTTTGGCATTAGCA CCTTATATTATTATAAAATTCTTAGATTTGAGT…
117	VC27	L.interrogans	South India(KE)	Human clinical	CTTTCTATTCCTCAGATTTCTACAGGAGATATTTTACGCGAGGCAGTAAAGAATCAAACT GCGATGGGAATAGAAGCAAAACGTTATATGGATGCGGGAGACTTGGTTCCAGATTCCGTA GTGATTGGAATCATAAAAGATCGCATTCGAGAAGCGGATTGTAAAAATGGATTTTTGTTG GATGGATTTCCGAGAACCGTGGAACAAGCGGAAGCTTTAGATACACTTTTAAAAAATGAA GGCAAGTCTATTGATAAAGCGATTAATCTTCAGGTTCCGGATGCGGAACTCTTAAAGAGA TTACTCGGCCGTGCAGAAATAGAAGGTCGCGCGGACGATAACGAAGTGACGATTAAAAAT CGTCTCGATAATTATAATAAGAAGACCTTACCT…	TATCTCGATATAGAACTGGATTATTATGATTTAGGCGTGGAGTACAGGGACAAAACGGAT GATAAAGTAACTGTGGATTCTGCTCACGCGATTCAAAAATATGGAGTAGGCGTAAAATGT GCGACGATTACTCCTAACCAAGATAGAGTTAAAGAATACAATCTCAAACAAGAATGGAAA TCTCCGAACGGAACCATTCGTTCTATTTTAGACGGAACCGTTTTTCGTAAACCGATCATC GTAAAAAATATTCCTCCTGCGGTTCGTTCTTGGAAAAAACCGATTACAGTAGGACGTCAC GCTTACGGAGATCTTTATAAGGACACAGAACTTTATATTCCCGAAGCCGGAAAGGTGGAA CTCGTTTATACCGGAAAGGACGGAAAAGAAAAA…	ATCTCCGTTGCACTCTTTGCAAGCATTACCGCTTGTGGTGCTTTCGGTGGTCTGCCAAGC CTAAAAAGCTCTTTTGTTCTGAGCGAGGACACAATCCCAGGGACAAACGAAACCGTAAAA ACGTTACTTCCCTACGGATCTGTGATCAACTATTACGGATACGTAAAGCCAGGACAAGCG CCGGACGGTTTAGTCGATGGAAACAAAAAAGCATACTATCTCTATGTTTGGATTCCTGCC GTAATCGCTGAAATGGGAGTTCGTATGATTTCCCCAACAGGCGAAATCGGTGAGCCAGGC GACGGAGACTTAGTAAGCGACGCTTTCAAAGCGGCTACCCCAGAAGAAAAATCAATGCCA CATTGGTTTGATACTTGGATCCGTGTAGAAAGA…	GGAAATTGCGCAGCTACAGTCGATGTAGAATATCCGGTATTCCCGAAAGATAAAGAAGGC CGTGCACTTCAGAAATTCCTCGGAACCATTCGTAACGTAGGTTTGGCTGTTGAAGCTCCT AAAAAAAGTCTTTGGGAAGCAATTTTCGGTGAAGGTTCCAGCTTTATCGATCAGATGCCT TCTAAAGTTTTCGAGGCGTTTGACAAAGAATCTTATTACAAACTTACCGACCTGAGTAAA CGTGCAGACGCAATCAACGAAGCAAGTCTTTCTCTTACAGGAATCACTAAAAATAGAGCG AAGATCGGAAATCTGATTGGAGCGGAAGCAATTCTATACATAGGTTACCAAAAACCTTAT ACAGAGTGTAGTACTGAAAATAAAATCGATGCA…	CACGTGCGTAATCTTCCTCTGAGTCTGGGATAACTTTCCGAAAGGGAAGCTAATACTGGA TGGTCCCGAGAGATCATAAGATTTTTCGGGTAAAGATTTATTGCTCGGAGATGAGCCCGC GTCCGATTAGCTAGTTGGTGAGGTAAAGGCTCACCAAGGCGACGATCGGTAGCCGGCCTG AGAGGGTGTTCGGCCACAATGGAACTGAGACACGGACCATACTCCTACGGGAGGCAGCAG TTAAGAATCTTGCTCAATGGGGGGAACCCTGAAGCAGCGACGCCGCGTGAACGATGAAGG TCTTCGGATTGTAAAGTTCAGTAAGCAGGGAAAAATAAGCAGCAATGTGATGATGGTACC TGCCTAAAGCACCGGCTAACTACGTGCCAGCAG…	ATGCCGATCATTTTTGCTTCGTCTTTGATTTTATTTCCTCAGACGATTATTCAATGGTTA TCTAATAGTAGTCAAGAATGGGCTGGATGGGCAGTGATTATGGATTTTTTTAATCCATTC TCTCAGATTTGGTATCATGCGTTATTTTATTTCGTAATTTATACCGCTTTAATTGTATTC TTTGCTTACTTCTATACAGCGATTCAGTTTAATCCTGCAGAATTGGCTGAGAATTTGAAA AAATACGGTGGGTTCATTCCAGGAATTCGTCCGGGTTCTCACACAAAAGAATACATTGAA AAAGTGTTAAATAGAATCACTCTTCCCGGAGCTATGTTTCTTGCAGGTTTGGCATTAGCA CCTTATATTATTATAAAATTCTTAGATTTGAGT…
118	VC28	L.interrogans	Central India(MD)	Human clinical	CTTTCTATTCCTCAGATTTCTACAGGAGATATTTTACGCGAGGCAGTAAAGAATCAAACT GCGATGGGAATAGAAGCAAAACGTTATATGGATGCGGGAGATTTGGTTCCAGATTCCGTA GTGATTGGAATCATAAAAGATCGCATTCGAGAAGCGGATTGTAAAAATGGATTTTTGTTG GATGGATTTCCGAGAACCGTGGAACAAGCGGAAGCTTTAGATACACTTTTAAAAAATGAA GGCAAGTCTATTGATAAAGCGATTAATCTTCAGGTTCCGGATGCGGAACTCTTAAAGAGA TTACTCGGCCGTGCAGAAATAGAAGGTCGCGCGGACGATAACGAAGTGACGATTAAAAAT CGTCTCGATAATTATAATAAGAAGACCTTACCT…	TATCTCGATATAGAACTGGATTATTATGATTTAGGCGTGGAGTACAGGGACAAAACGGAT GATAAAGTAACTGTGGATTCTGCTCACGCGATTCAAAAATATGGAGTAGGCGTAAAATGT GCGACGATTACTCCTAACCAAGATAGAGTTAAAGAATACAATCTCAAACAAGAATGGAAA TCTCCGAACGGAACCATTCGTTCTATTTTAGACGGAACCGTTTTTCGTAAACCGATCATC GTAAAAAATATTCCTCCTGCGGTTCGTTCTTGGAAAAAACCGATTACAGTAGGACGTCAC GCTTACGGAGATCTTTATAAGGACACAGAACTTTATATTCCCGAAGCCGGAAAGGTGGAA CTCGTTTATACCGGAAAGGACGGAAAAGAAAAA…	ATCTCCGTTGCACTCTTTGCAAGCATTACCGCTTGTGGTGCTTTCGGTGGTCTGCCAAGC CTAAAAAGCTCTTTTGTTCTGAGCGAGGACACAATCCCAGGGACAAACGAAACCGTAAAA ACGTTACTTCCCTACGGATCTGTGATCAACTATTACGGATACGTAAAGCCAGGACAAGCG CCGGACGGTTTAGTCGATGGAAACAAAAAAGCATACTATCTCTATGTTTGGATTCCTGCC GTAATCGCTGAAATGGGAGTTCGTATGATTTCCCCAACAGGCGAAATCGGTGAACCAGGC GACGGAGACTTAGTAAGCGACGCTTTCAAAGCGGCTACCCCAGAAGAAAAATCAATGCCA CATTGGTTTGATACTTGGATCCGTGTAGAAAGA…	GGAAATTGCGCAGCTACAGTCGATGTAGAATATCCGGTATTCCCGAAAGATAAAGAAGGC CGTGCACTTCAGAAATTCCTCGGAACCATTCGTAACGTAGGTTTGGCCGTTGAAGCTCCT AAAAAAAGTCTTTGGGAAGCAATTTTCGGTGAAGGTTCCAGCTTTATCGATCAGATGCCT TCTAAAGTTTTCGAGGCGTTTGACAAAGAATCTTATTACAAACTTACCGACCTAAGCAAA CGTGCAGACGCAATCAACGAAGCAAGTCTTTCTCTTACAGGAATCACTAAAAATAGAGCG AAGATCGGAAATCTGATTGGAGCGGAAGCAATTCTATACATAGGTTACCAAAAACCTTAT ACAGAGTGTAGTACTGAAAATAAAATCGATGCG…	CACGTGGGTAATCTTCCTCTGAGTCTGGGATAACTTTCCGAAAGGGAAGCTAATACTGGA TGGTCCCGAGAGATCATAAGATGTTTCGGGTAAAGATTTATTGCTCGGAGATGAGCCCGC GTCCGATTAGCTAGTTGGTGAGGTAAAGGCTCACCAAGGCGACGATCGGTAGCCGGCCTG AGAGGGTGTTCGGCCACAATGGAACTGAGACACGGTCCATACTCCTACGGGAGGCAGCAG TTAAGAATCTTGCTCAATGGGGGGAACCCTGAAGCAGCGACGCCGCGTGAACGATGAAGG TCTTCGGATTGTAAAGTTCAGTAAGCAGGGAAAAATAAGCAGCGATGTGATGATGGTACC TGCCTAAAGCACCGGCTAACTACGTGCCAGCAG…	ATGCCGATCATTTTTGCTTCGTCTTTGATTTTATTTCCTCAGACGATTATTCAATGGTTA TCTAATAGTAGTCAAGAATGGGCTGGATGGGCAGTGATTATGGATTTTTTTAATCCATTC TCTCAGATTTGGTATCATGCGTTATTTTATTTCGTAATTTATACCGCTTTAATTGTATTC TTTGCTTACTTCTATACAGCGATTCAGTTTAATCCTGCAGAATTGGCTGAGAATTTGAAA AAATACGGTGGATTCATTCCAGGAATTCGTCCGGGTTCTCACACAAAAGAATACATTGAA AAAGTGTTAAATAGAATCACTCTCCCTGGAGCTATGTTTCTTGCAGGTTTGGCATTAGCA CCTTATATTATTATAAAATTCTTAGATTTGAGC…
119	VC29	L.interrogans	Central India(MD)	Human clinical	CTTTCTATTCCTCAGATTTCTACAGGAGATATTTTACGCGAGGCAGTAAAGAATCAAACT GCGATGGGAATAGAAGCAAAACGTTATATGGATGCGGGAGATTTGGTTCCAGATTCCGTA GTGATTGGAATCATAAAAGATCGCATTCGAGAAGCGGATTGTAAAAATGGATTTTTGTTG GATGGATTTCCGAGAACCGTGGAACAAGCGGAAGCTTTAGATACACTTTTAAAAAATGAA GGCAAGTCTATTGATAAAGCGATTAATCTTCAGGTTCCGGATGCGGAACTCTTAAAGAGA TTACTCGGCCGTGCAGAAATAGAAGGTCGCGCGGACGATAACGAAGTGACGATTAAAAAT CGTCTCGATAATTATAATAAGAAGACCTTACCT…	TATCTCGATATAGAACTGGATTATTATGATTTAGGCGTGGAGTACAGGGACAAAACGGAT GATAAAGTAACTGTGGATTCTGCTCACGCGATTCAAAAATATGGAGTAGGCGTAAAATGT GCGACGATTACTCCTAACCAAGATAGAGTTAAAGAATACAATCTCAAACAAGAATGGAAA TCTCCGAACGGAACCATTCGTTCTATTTTAGACGGAACCGTTTTTCGTAAACCGATCATC GTAAAAAATATTCCTCCTGCGGTTCGTTCTTGGAAAAAACCGATTACAGTAGGACGTCAC GCTTACGGAGATCTTTATAAGGACACAGAACTTTATATTCCCGAAGCCGGAAAGGTGGAA CTCGTTTATACCGGAAAGGACGGAAAAGAAAAA…	ATCTCCGTTGCACTCTTTGCAAGCATTACCGCTTGTGGTGCTTTCGGTGGTCTGCCAAGC CTAAAAAGCTCTTTTGTTCTGAGCGAGGACACAATCCCAGGGACAAACGAAACCGTAAAA ACGTTACTTCCCTACGGATCTGTGATCAACTATTACGGATACGTAAAGCCAGGACAAGCG CCGGACGGTTTAGTCGATGGAAACAAAAAAGCATACTATCTCTATGTTTGGATTCCTGCC GTAATCGCTGAAATGGGAGTTCGTATGATTTCCCCAACAGGCGAAATCGGTGAACCAGGC GACGGAGACTTAGTAAGCGACGCTTTCAAAGCGGCTACCCCAGAAGAAAAATCAATGCCA CATTGGTTTGATACTTGGATCCGTGTAGAAAGA…	GGAAATTGCGCAGCTACAGTCGATGTAGAATATCCGGTATTCCCGAAAGATAAAGAAGGC CGTGCACTTCAGAAATTCCTCGGAACCATTCGTAACGTAGGTTTGGCCGTTGAAGCTCCT AAAAAAAGTCTTTGGGAAGCAATTTTCGGTGAAGGTTCCAGCTTTATCGATCAGATGCCT TCTAAAGTTTTCGAGGCGTTTGACAAAGAATCTTATTACAAACTTACCGACCTAAGCAAA CGTGCAGACGCAATCAACGAAGCAAGTCTTTCTCTTACAGGAATCACTAAAAATAGAGCG AAGATCGGAAATCTGATTGGAGCGGAAGCAATTCTATACATAGGTTACCAAAAACCTTAT ACAGAGTGTAGTACTGAAAATAAAATCGATGCG…	CACGTGCGTAATCTTCCTCTGAGTCTGGGATAACTTTCCGAAAGGGAAGCTAATACTGGA TGGTCCCGAGAGATCATAAGATTTTTCGGGTAAAGATTTATTGCTCGGAGATGAGCCCGC GTCCGATTAGCTAGTTGGTGAGGTAAAGGCTCACCAAGGCGACGATCGGTAGCCGGCCTG AGAGGGTGTTCGGCCACAATGGAACTGAGACACGGACCATACTCCTACGGGAGGCAGCAG TTAAGAATCTTGCTCAATGGGGGGAACCCTGAAGCAGCGACGCCGCGTGAACGATGAAGG TCTTCGGATTGTAAAGTTCAGTAAGCAGGGAAAAATAAGCAGCAATGTGATGATGGTACC TGCCTAAAGCACCGGCTAACTACGTGCCAGCAG…	ATGCCGATCATTTTTGCTTCGTCTTTGATTTTATTTCCTCAGACGATTATTCAATGGTTA TCTAATAGTAGTCAAGAATGGGCTGGATGGGCAGTGATTATGGATTTTTTTAATCCATTC TCTCAGATTTGGTATCATGCGTTATTTTATTTCGTAATTTATACCGCTTTAATTGTATTC TTTGCTTACTTCTATACAGCGATTCAGTTTAATCCTGCAGAATTGGCTGAGAATTTGAAA AAATACGGTGGATTCATTCCAGGAATTCGTCCGGGTTCTCACACAAAAGAATACATTGAA AAAGTGTTAAATAGAATCACTCTCCCTGGAGCTATGTTTCTTGCAGGTTTGGCATTAGCA CCTTATATTATTATAAAATTCTTAGATTTGAGC…
120	VC30	L.interrogans	Central India(MD)	Human clinical	CTTTCTATTCCTCAGATTTCTACAGGAGATATTTTACGCGAGGCAGTAAAGAATCAAACT GCGATGGGAATAGAAGCAAAACGTTATATGGATGCGGGAGATTTGGTTCCAGATTCCGTA GTGATTGGAATCATAAAAGATCGCATTCGAGAAGCGGATTGTAAAAATGGATTTTTGTTG GATGGATTTCCGAGAACCGTGGAACAAGCGGAAGCTTTAGATACACTTTTAAAAAATGAA GGCAAGTCTATTGATAAAGCGATTAATCTTCAGGTTCCGGATGCGGAACTCTTAAAGAGA TTACTCGGCCGTGCAGAAATAGAAGGTCGCGCGGACGATAACGAAGTGACGATTAAAAAT CGTCTCGATAATTATAATAAGAAGACCTTACCT…	TATCTCGATATAGAACTGGATTATTATGATTTAGGCGTGGAGTACAGGGACAAAACGGAT GATAAAGTAACTGTGGATTCTGCTCACGCGATTCAAAAATATGGAGTAGGCGTAAAATGT GCGACGATTACTCCTAACCAAGATAGAGTTAAAGAATACAATCTCAAACAAGAATGGAAA TCTCCGAACGGAACCATTCGTTCTATTTTAGACGGAACCGTTTTTCGTAAACCGATCATC GTAAAAAATATTCCTCCTGCGGTTCGTTCTTGGAAAAAACCGATTACAGTAGGACGTCAC GCTTACGGAGATCTTTATAAGGACACAGAACTTTATATTCCCGAAGCCGGAAAGGTGGAA CTCGTTTATACCGGAAAGGACGGAAAAGAAAAA…	ATCTCCGTTGCACTCTTTGCAAGCATTACCGCTTGTGGTGCTTTCGGTGGTCTGCCAAGC CTAAAAAGCTCTTTTGTTCTGAGCGAGGACACAATCCCAGGGACAAACGAAACCGTAAAA ACGTTACTTCCCTACGGATCTGTGATCAACTATTACGGATACGTAAAGCCAGGACAAGCG CCGGACGGTTTAGTCGATGGAAACAAAAAAGCATACTATCTCTATGTTTGGATTCCTGCC GTAATCGCTGAAATGGGAGTTCGTATGATTTCCCCAACAGGCGAAATCGGTGAGCCAGGC GACGGAGACTTAGTAAGCGACGCTTTCAAAGCGGCTACCCCAGAAGAAAAATCAATGCCA CATTGGTTTGATACTTGGATCCGTGTAGAAAGA…	GGAAATTGCGCAGCTACAGTCGATGTAGAATATCCGGTATTCCCGAAAGATAAAGAAGGC CGTGCACTTCAGAAATTCCTCGGAACCATTCGTAACGTAGGTTTGGCCGTTGAAGCTCCT AAAAAAAGTCTTTGGGAAGCAATTTTCGGTGAAGGTTCCAGCTTTATCGATCAGATGCCT TCTAAAGTTTTCGAGGCGTTTGACAAAGAATCTTATTACAAACTTACCGACCTAAGCAAA CGTGCAGACGCAATCAACGAAGCAAGTCTTTCTCTTACAGGAATCACTAAAAATAGAGCG AAGATCGGAAATCTGATTGGAGCGGAAGCAATTCTATACATAGGTTACCAAAAACCTTAT ACAGAGTGTAGTACTGAAAATAAAATCGATGCG…	CACGTGCGTAATCTTCCTCTGAGTCTGGGATAACTTTCCGAAAGGGAAGCTAATACTGGA TGGTCCCGAGAGATCATAAGATGTTTCGGGTAAAGATTCATTGCTCGGAGATGAGCCCGC GTCCGATTAGCTAGTTGGTGAGGTAAAGGCTCACCAAGGCGACGATCGGTAGCCGGCCTG AGAGGGTGTTCGGCCACAATGGAACTGAGACACGGTCCATACTCCTACGGGAGGCAGCAG TTAAGAATCTTGCTCAATGGGGGGAACCCTGAAGCAGCGACGCCGCGTGAACGATGAAGG TCTTCGGATTGTAAAGTTCAGTAAGCAGGGAAAAATAAGCAGCAATGTGATGATGGTACC TGCCTAAAGCACCGGCTAACTACGTGCCAGCAG…	ATGCCGATCATTTTTGCTTCGTCTTTGATTTTATTTCCTCAGACGATTATTCAATGGTTA TCTAATAGTAGTCAAGAATGGGCTGGATGGGCAGTGATTATGGATTTTTTTAATCCATTC TCTCAGATTTGGTATCATGCGTTATTTTATTTCGTAATTTATACCGCTTTAATTGTATTC TTTGCTTACTTCTATACAGCGATTCAGTTTAATCCTGCAGAATTGGCTGAGAATTTGAAA AAATACGGTGGATTCATTCCAGGAATTCGTCCGGGTTCTCACACAAAAGAATACATTGAA AAAGTGTTAAATAGAATCACTCTCCCTGGAGCTATGTTTCTTGCAGGTTTGGCATTAGCA CCTTATATTATTATAAAATTCTTAGATTTGAGC…
121	VC31	L.interrogans	Central India(MD)	Human clinical	CTTTCTATTCCTCAGATTTCTACAGGAGATATTTTACGCGAGGCAGTAAAGAATCAAACT GCGATGGGAATAGAAGCAAAACGTTATATGGATGCGGGAGATTTGGTTCCAGATTCCGTA GTGATTGGAATCATAAAAGATCGCATTCGAGAAGCGGATTGTAAAAATGGATTTTTGTTG GATGGATTTCCGAGAACCGTGGAACAAGCGGAAGCTTTAGATACACTTTTAAAAAATGAA GGCAAGTCTATTGATAAAGCGATTAATCTTCAGGTTCCGGATGCGGAACTCTTAAAGAGA TTACTCGGCCGTGCAGAAATAGAAGGTCGCGCGGACGATAACGAAGTGACGATTAAAAAT CGTCTCGATAATTATAATAAGAAGACCTTACCT…	TATCTCGATATAGAACTGGATTATTATGATTTAGGCGTGGAGTACAGGGACAAAACGGAT GATAAAGTAACTGTGGATTCTGCTCACGCGATTCAAAAATATGGAGTAGGCGTAAAATGT GCGACGATTACTCCTAACCAAGATAGAGTTAAAGAATACAATCTCAAACAAGAATGGAAA TCTCCGAACGGAACCATTCGTTCTATTTTAGACGGAACCGTTTTTCGTAAACCGATCATC GTAAAAAATATTCCTCCTGCGGTTCGTTCTTGGAAAAAACCGATTACAGTAGGACGTCAC GCTTACGGAGATCTTTATAAGGACACAGAACTTTATATTCCCGAAGCCGGAAAGGTGGAA CTCGTTTATACCGGAAAGGACGGAAAAGAAAAA…	ATCTCCGTTGCACTCTTTGCAAGCATTACCGCTTCTGGTGCTTTCGGTGGTCTGCCAAGC CTAAAAAGCTCTTTTGTTCTGAGCGAGGACACAATCCCAGGGACAAACGAAACCGTAAAA ACGTTACTTCCCTACGGATCTGTGATCAACTATTACGGATACGTAAAGCCAGGACAAGCG CCGGACGGTTTAGTCGATGGAAACAAAAAAGCATACTATCTCTATGTTTGGATTCCTGCC GTAATCGCTGAAATGGGAGTTCGTATGATTTCCCCAACAGGCGAAATCGGTGAACCAGGC GACGGAGACTTAGTAAGCGACGCTTTCAAAGCGGCTACCCCAGAAGAAAAATCAATGCCA CATTGGTTTGATACTTGGATCCGTGTAGAAAGA…	GGAAATTGCGCAGCTACAGTCGATGTAGAATATCCGGTATTCCCGAAAGATAAAGAAGGC CGTGCACTTCAGAAATTCCTCGGAACCATTCGTAACGTAGGTTTGGCCGTTGAAGCTCCT AAAAAAAGTCTTTGGGAAGCAATTTTCGGTGAAGGTTCCAGCTTTATCGATCAGATGCCT TCTAAAGTTTTCGAGGCGTTTGACAAAGAATCTTATTACAAACTTACCGACCTAAGCAAA CGTGCAGACGCAATCAACGAAGCAAGTCTTTCTCTTACAGGAATCACTAAAAATAGAGCG AAGATCGGAAATCTGATTGGAGCGGAAGCAATTCTATACATAGGTTACCAAAAACCTTAT ACAGAGTGTAGTACTGAAAATAAAATCGATGCG…	CACGTGGGTAATCTTCCTCTGAGTCTGGGATAACTTTCCGAAAGGGAAGCTAATACTGGA TGGTCCCGAGAGATCACAAGATTTTTCGGGTAAAGATTTATTGCTCGGAGATGAGCCCGC GTCCGATTAGCTAGTTGGTGAGGTAAAGGCTCACCAAGGCGACGATCGGTAGCCGGCCTG AGAGGGTGTTCGGCCACAATGGAACTGAGACACGGTCCATACTCCTACGGGAGGCAGCAG TTAAGAATCTTGCTCAATGGGGGGAACCCTGAAGCAGCGACGCCGCGTGAACGATGAAGG TCTTCGGATTGTAAAGTTCAGTAAGCAGGGAAAAATAAGCAGCAATGTGATGATGGTACC TGCCTAAAGCACCGGCTAACTACGTGCCAGCAG…	ATGCCGATCATTTTTGCTTCGTCTTTGATTTTATTTCCTCAGACGATTATTCAATGGTTA TCTAATAGTAGTCAAGAATGGGCTGGATGGGCAGTGATTATGGATTTTTTTAATCCATTC TCTCAGATTTGGTATCATGCGTTATTTTATTTCGTAATTTATACCGCTTTAATTGTATTC TTTGCTTACTTCTATACAGCGATTCAGTTTAATCCTGCAGAATTGGCTGAGAATTTGAAA AAATACGGTGGATTCATTCCAGGAATTCGTCCGGGTTCTCACACAAAAGAATACATTGAA AAAGTGTTAAATAGAATCACTCTCCCTGGAGCTATGTTTCTTGCAGGTTTGGCATTAGCA CCTTATATTATTATAAAATTCTTAGATTTGAGC…
122	VC32	L.interrogans	Central India(MD)	Human clinical	CTTTCTATTCCTCAGATTTCTACAGGAGATATTTTACGCGAGGCAGTAAAGAATCAAACT GCGATGGGAATAGAAGCAAAACGTTATATGGATGCGGGAGATTTGGTTCCAGATTCCGTA GTGATTGGAATCATAAAAGATCGCATTCGAGAAGCGGATTGTAAAAATGGATTTTTGTTG GATGGATTTCCGAGAACCGTGGAACAAGCGGAAGCTTTAGATACACTTTTAAAAAATGAA GGCAAGTCTATTGATAAAGCGATTAATCTTCAGGTTCCGGATGCGGAACTCTTAAAGAGA TTACTCGGCCGTGCAGAAATAGAAGGTCGCGCGGACGATAACGAAGTGACGATTAAAAAT CGTCTCGATAATTATAATAAGAAGACCTTACCT…	TATCTCGATATAGAACTGGATTATTATGATTTAGGCGTGGAGTACAGGGACAAAACGGAT GATAAAGTAACTGTGGATTCTGCTCACGCGATTCAAAAATATGGAGTAGGCGTAAAATGT GCGACGATTACTCCTAACCAAGATAGAGTTAAAGAATACAATCTCAAACAAGAATGGAAA TCTCCGAACGGAACCATTCGTTCTATTTTAGACGGAACCGTTTTTCGTAAACCGATCATC GTAAAAAATATTCCTCCTGCGGTTCGTTCTTGGAAAAAACCGATTACAGTAGGACGTCAC GCTTACGGAGATCTTTATAAGGACACAGAACTTTATATTCCCGAAGCCGGAAAGGTGGAA CTCGTTTATACCGGAAAGGACGGAAAAGAAAAA…	ATCTCCGTTGCACTCTTTGCAAGCATTACCGCTTCTGGTGCTTTCGGTGGTCTGCCAAGC CTAAAAAGCTCTTTTGTTCTGAGCGAGGACACAATCCCAGGGACAAACGAAACCGTAAAA ACGTTACTTCCCTACGGATCTGTGATCAACTATTACGGATACGTAAAGCCAGGACAAGCG CCGGACGGTTTAGTCGATGGAAACAAAAAAGCATACTATCTCTATGTTTGGATTCCTGCC GTAATCGCTGAAATGGGAGTTCGTATGATTTCCCCAACAGGCGAAATCGGTGAGCCAGGC GACGGAGACTTAGTAAGCGACGCTTTCAAAGCGGCTACCCCAGAAGAAAAATCAATGCCA CATTGGTTTGATACTTGGATCCGTGTAGAAAGA…	GGAAATTGCGCAGCTACAGTCGATGTAGAATATCCGGTATTCCCGAAAGATAAAGAAGGC CGTGCACTTCAGAAATTCCTCGGAACCATTCGTAACGTAGGTTTGGCTGTTGAAGCTCCT AAAAAAAGTCTTTGGGAAGCAATTTTCGGTGAAGGTTCCAGCTTTATCGATCAGATGCCT TCTAAAGTTTTCGAGGCGTTTGACAAAGAATCTTATTACAAACTTACCGACCTGAGTAAA CGTGCAGACGCAATCAACGAAGCAAGTCTTTCTCTTACAGGAATCACTAAAAATAGAGCG AAGATCGGAAATCTGATTGGAGCGGAAGCAATTCTATACATAGGTTACCAAAAACCTTAT ACAGAGTGTAGTACTGAAAATAAAATCGATGCG…	CACGTGGGTAATCTTCCTCTGAGTCTGGGATAACTTTCCGAAAGGGAAGCTAATACTGGA TGGTCCCGAGAGATCACAAGATTTTTCGGGTAAAGATTTATTGCTCGGAGATGAGCCCGC GTCCGATTAGCTAGTTGGTGAGGTAAAGGCTCACCAAGGCGACGATCGGTAGCCGGCCTG AGAGGGTGTTCGGCCACAATGGAACTGAGACACGGTCCATACTCCTACGGGAGGCAGCAG TTAAGAATCTTGCTCAATGGGGGGAACCCTGAAGCAGCGACGCCGCGTGAACGATGAAGG TCTTCGGATTGTAAAGTTCAGTAAGCAGGGAAAAATAAGCAGCAATGTGATGATGGTACC TGCCTAAAGCACCGGCTAACTACGTGCCAGCAG…	ATGCCGATCATTTTTGCTTCGTCTTTGATTTTATTTCCTCAGACGATTATTCAATGGTTA TCTAATAGTAGTCAAGAATGGGCTGGATGGGCAGTGATTATGGATTTTTTTAATCCATTC TCTCAGATTTGGTATCATGCGTTATTTTATTTCGTAATTTATACCGCTTTAATTGTATTC TTTGCTTACTTCTATACAGCGATTCAGTTTAATCCTGCAGAATTGGCTGAGAATTTGAAA AAATACGGTGGATTCATTCCAGGAATTCGTCCGGGTTCTCACACAAAAGAATACATTGAA AAAGTGTTAAATAGAATCACTCTCCCTGGAGCTATGTTTCTTGCAGGTTTGGCATTAGCA CCTTATATTATTATAAAATTCTTAGATTTGAGC…
123	VC33	L.interrogans	UnKnown	Hepatic	CTTTCTATTCCTCAGATTTCTACAGGAGATATTTTACGCGAGGCAGTAAAGAATCAAACT GCGATGGGAATAGAAGCAAAACGTTATATGGATGCGGGAGATTTGGTTCCAGATTCCGTA GTGATTGGAATCATAAAAGATCGCATTCGAGAAGCGGATTGTAAAAATGGATTTTTGTTG GATGGATTTCCGAGAACCGTGGAACAAGCGGAAGCTTTAGATACACTTTTAAAAAATGAA GGCAAGTCTATTGATAAAGCGATTAATCTTCAGGTTCCGGATGCGGAACTCTTAAAGAGA TTACTCGGCCGTGCAGAAATAGAAGGTCGCGCGGACGATAACGAAGTGACGATTAAAAAT CGTCTCGATAATTATAATAAGAAGACCTTACCT…	TATCTCGATATAGAACTGGATTATTATGATTTAGGCGTGGAGTACAGGGACAAAACGGAT GATAAAGTAACTGTGGATTCTGCTCACGCGATTCAAAAATATGGAGTAGGCGTAAAATGT GCGACGATTACTCCTAACCAAGATAGAGTTAAAGAATACAATCTCAAACAAGAATGGAAA TCTCCGAACGGAACCATTCGTTCTATTTTAGACGGAACCGTTTTTCGTAAACCGATCATC GTAAAAAATATTCCTCCTGCGGTTCGTTCTTGGAAAAAACCGATTACAGTAGGACGTCAC GCTTACGGAGATCTTTATAAGGACACAGAACTTTATATTCCCGAAGCCGGAAAGGTGGAA CTCGTTTATACCGGAAAGGACGGAAAAGAAAAA…	ATCTCCGTTGCACTCTTTGCAAGCATTACCGCTTCTGGTGCTTTCGGTGGTCTGCCAAGC CTAAAAAGCTCTTTTGTTCTGAGCGAGGACACAATCCCAGGGACAAACGAAACCGTAAAA ACGTTACTTCCCTACGGATCTGTGATCAACTATTACGGATACGTAAAGCCAGGACAAGCG CCGGACGGTTTAGTCGATGGAAACAAAAAAGCATACTATCTCTATGTTTGGATTCCTGCC GTAATCGCTGAAATGGGAGTTCGTATGATTTCCCCAACAGGCGAAATCGGTGAACCAGGC GACGGAGACTTAGTAAGCGACGCTTTCAAAGCGGCTACCCCAGAAGAAAAATCAATGCCA CATTGGTTTGATACTTGGATCCGTGTAGAAAGA…	GGAAATTGCGCAGCTACAGTCGATGTAGAATATCCGGTATTCCCGAAAGATAAAGAAGGC CGTGCACTTCAGAAATTCCTCGGAACCATTCGTAACGTAGGTTTGGCTGTTGAAGCTCCT AAAAAAAGTCTTTGGGAAGCAATTTTCGGTGAAGGTTCCAGCTTTATCGATCAGATGCCT TCTAAAGTTTTCGAGGCGTTTGACAAAGAATCTTATTACAAACTTACCGACCTGAGTAAA CGTGCAGACGCAATCAACGAAGCAAGTCTTTCTCTTACAGGAATCACTAAAAATAGAGCG AAGATCGGAAATCTGATTGGAGCGGAAGCAATTCTATACATAGGTTACCAAAAACCTTAT ACAGAGTGTAGTACTGAAAATAAAATCGATGCG…	CACGTGGGTAATCTTCCTCTGAGTCTGGGATAACTTTCCGAAAGGGAAGCTAATACTGGA TGGTCCCGAGAGATCACAGGATGTATCGGGTAAAGATTCATTGCTCGGAGATGAGCCCGC GTCCGATTAGCTAGTTGGTGAGGTAAAGGCTCACCAAGGCGACGATCGGTAGCCGGCCTG AGAGGGTGTTCGGCCACAATGGAACTGAGACACGGTCCATACTCCTACGGGAGGCAGCAG TTAAGAATCTTGCTCAATGGGGGGAACCCTGAAGCAGCGACGCCGCGTGAACGATGAAGG TCTTCGGATTGTAAAGTTCAGTAAGCAGGGAAAAATAAGCAGCAATGTGATGATGGTACC TGCCTAAAGCACCGGCTAACTACGTGCCAGCAG…	ATGCCGATCATTTTTGCTTCGTCTTTGATTTTATTTCCTCAGACGATTATTCAATGGTTA TCTAATAGTAGTCAAGAATGGGCTGGATGGGCAGTGATTATGGATTTTTTTAATCCATTC TCTCAGATTTGGTATCATGCGTTATTTTATTTCGTAATTTATACCGCTTTAATTGTATTC TTTGCTTACTTCTATACAGCGATTCAGTTTAATCCTGCAGAATTGGCTGAGAATTTGAAA AAATACGGTGGATTCATTCCAGGAATTCGTCCGGGTTCTCACACAAAAGAATACATTGAA AAAGTGTTAAATAGAATCACTCTCCCTGGAGCTATGTTTCTTGCAGGTTTGGCATTAGCA CCTTATATTATTATAAAATTCTTAGATTTGAGC…
124	VC34	L.interrogans	Central India(MD)	Human clinical	CTTTCTATTCCTCAGATTTCTACAGGAGATATTTTACGCGAGGCAGTAAAGAATCAAACT GCGATGGGAATAGAAGCAAAACGTTATATGGATGCGGGAGATTTGGTTCCAGATTCCGTA GTGATTGGAATCATAAAAGATCGCATTCGAGAAGCGGATTGTAAAAATGGATTTTTGTTG GATGGATTTCCGAGAACCGTGGAACAAGCGGAAGCTTTAGATACACTTTTAAAAAATGAA GGCAAGTCTATTGATAAAGCGATTAATCTTCAGGTTCCGGATGCGGAACTCTTAAAGAGA TTACTCGGCCGTGCAGAAATAGAAGGTCGCGCGGACGATAACGAAGTGACGATTAAAAAT CGTCTCGATAATTATAATAAGAAGACCTTACCT…	TATCTCGATATAGAACTGGATTATTATGATTTAGGCGTGGAGTACAGGGACAAAACGGAT GATAAAGTAACTGTGGATTCTGCTCACGCGATTCAAAAATATGGAGTAGGCGTAAAATGT GCGACGATTACTCCTAACCAAGATAGAGTTAAAGAATACAATCTCAAACAAGAATGGAAA TCTCCGAACGGAACCATTCGTTCTATTTTAGACGGAACCGTTTTTCGTAAACCGATCATC GTAAAAAATATTCCTCCTGCGGTTCGTTCTTGGAAAAAACCGATTACAGTAGGACGTCAC GCTTACGGAGATCTTTATAAGGACACAGAACTTTATATTCCCGAAGCCGGAAAGGTGGAA CTCGTTTATACCGGAAAGGACGGAAAAGAAAAA…	ATCTCCGTTGCACTCTTTGCAAGCATTACCGCTTCTGGTGCTTTCGGTGGTCTGCCAAGC CTAAAAAGCTCTTTTGTTCTGAGCGAGGACACAATCCCAGGGACAAACGAAACCGTAAAA ACGTTACTTCCCTACGGATCTGTGATCAACTATTACGGATACGTAAAGCCAGGACAAGCG CCGGACGGTTTAGTCGATGGAAACAAAAAAGCATACTATCTCTATGTTTGGATTCCTGCC GTAATCGCTGAAATGGGAGTTCGTATGATTTCCCCAACAGGCGAAATCGGTGAACCAGGC GACGGAGACTTAGTAAGCGACGCTTTCAAAGCGGCTACCCCAGAAGAAAAATCAATGCCA CATTGGTTTGATACTTGGATCCGTGTAGAAAGA…	GGAAATTGCGCAGCTACAGTCGATGTAGAATATCCGGTATTCCCGAAAGATAAAGAAGGC CGTGCACTTCAGAAATTCCTCGGAACCATTCGTAACGTAGGTTTGGCCGTTGAAGCTCCT AAAAAAAGTCTTTGGGAAGCAATTTTCGGTGAAGGTTCCAGCTTTATCGATCAGATGCCT TCTAAAGTTTTCGAGGCGTTTGACAAAGAATCTTATTACAAACTTACCGACCTAAGCAAA CGTGCAGACGCAATCAACGAAGCAAGTCTTTCTCTTACAGGAATCACTAAAAATAGAGCG AAGATCGGAAATCTGATTGGAGCGGAAGCAATTCTATACATAGGTTACCAAAAACCTTAT ACAGAGTGTAGTACTGAAAATAAAATCGATGCG…	CACGTGGGTAATCTTCCTCTGAGTCTGGGATAACTTTCCGAAAGGGAAGCTAATACTGGA TGGTCCCGAGAGATCACAAGATTTTTCGGGTAAAGATTTATTGCTCGGAGATGAGCCCGC GTCCGATTAGCTAGTTGGTGAGGTAAAGGCTCACCAAGGCGACGATCGGTAGCCGGCCTG AGAGGGTGTTCGGCCACAATGGAACTGAGACACGGTCCATACTCCTACGGGAGGCAGCAG TTAAGAATCTTGCTCAATGGGGGGAACCCTGAAGCAGCGACGCCGCGTGAACGATGAAGG TCTTCGGATTGTAAAGTTCAGTAAGCAGGGAAAAATAAGCAGCAATGTGATGATGGTACC TGCCTAAAGCACCGGCTAACTACGTGCCAGCAG…	ATGCCGATCATTTTTGCTTCGTCTTTGATTTTATTTCCTCAGACGATTATTCAATGGTTA TCTAATAGTAGTCAAGAATGGGCTGGATGGGCAGTGATTATGGATTTTTTTAATCCATTC TCTCAGATTTGGTATCATGCGTTATTTTATTTCGTAATTTATACCGCTTTAATTGTATTC TTTGCTTACTTCTATACAGCGATTCAGTTTAATCCTGCAGAATTGGCTGAGAATTTGAAA AAATACGGTGGATTCATTCCAGGAATTCGTCCGGGTTCTCACACAAAAGAATACATTGAA AAAGTGTTAAATAGAATCACTCTCCCTGGAGCTATGTTTCTTGCAGGTTTGGCATTAGCA CCTTATATTATTATAAAATTCTTAGATTTGAGC…
125	VC35	L.interrogans	Central India(MD)	Human clinical	CTTTCTATTCCTCAGATTTCTACAGGAGATATTTTACGCGAGGCAGTAAAGAATCAAACT GCGATGGGAATAGAAGCAAAACGTTATATGGATGCGGGAGATTTGGTTCCAGATTCCGTA GTGATTGGAATCATAAAAGATCGCATTCGAGAAGCGGATTGTAAAAATGGATTTTTGTTG GATGGATTTCCGAGAACCGTGGAACAAGCGGAAGCTTTAGATACACTTTTAAAAAATGAA GGCAAGTCTATTGATAAAGCGATTAATCTTCAGGTTCCGGATGCGGAACTCTTAAAGAGA TTACTCGGCCGTGCAGAAATAGAAGGTCGCGCGGACGATAACGAAGTGACGATTAAAAAT CGTCTCGATAATTATAATAAGAAGACCTTACCT…	TATCTCGATATAGAACTGGATTATTATGATTTAGGCGTGGAGTACAGGGACAAAACGGAT GATAAAGTAACTGTGGATTCTGCTCACGCGATTCAAAAATATGGAGTAGGCGTAAAATGT GCGACGATTACTCCTAACCAAGATAGAGTTAAAGAATACAATCTCAAACAAGAATGGAAA TCTCCGAACGGAACCATTCGTTCTATTTTAGACGGAACCGTTTTTCGTAAACCGATCATC GTAAAAAATATTCCTCCTGCGGTTCGTTCTTGGAAAAAACCGATTACAGTAGGACGTCAC GCTTACGGAGATCTTTATAAGGACACAGAACTTTATATTCCCGAAGCCGGAAAGGTGGAA CTCGTTTATACCGGAAAGGACGGAAAAGAAAAA…	ATCTCCGTTGCACTCTTTGCAAGCATTACCGCTTCTGGTGCTTTCGGTGGTCTGCCAAGC CTAAAAAGCTCTTTTGTTCTGAGCGAGGACACAATCCCAGGGACAAACGAAACCGTAAAA ACGTTACTTCCCTACGGATCTGTGATCAACTATTACGGATACGTAAAGCCAGGACAAGCG CCGGACGGTTTAGTCGATGGAAACAAAAAAGCATACTATCTCTATGTTTGGATTCCTGCC GTAATCGCTGAAATGGGAGTTCGTATGATTTCCCCAACAGGCGAAATCGGTGAGCCAGGC GACGGAGACTTAGTAAGCGACGCTTTCAAAGCGGCTACCCCAGAAGAAAAATCAATGCCA CATTGGTTTGATACTTGGATCCGTGTAGAAAGA…	GGAAATTGCGCAGCTACAGTCGATGTAGAATATCCGGTATTCCCGAAAGATAAAGAAGGC CGTGCACTTCAGAAATTCCTCGGAACCATTCGTAACGTAGGTTTGGCCGTTGAAGCTCCT AAAAAAAGTCTTTGGGAAGCAATTTTCGGTGAAGGTTCCAGCTTTATCGATCAGATGCCT TCTAAAGTTTTCGAGGCGTTTGACAAAGAATCTTATTACAAACTTACCGACCTAAGCAAA CGTGCAGACGCAATCAACGAAGCAAGTCTTTCTCTTACAGGAATCACTAAAAATAGAGCG AAGATCGGAAATCTGATTGGAGCGGAAGCAATTCTATACATAGGTTACCAAAAACCTTAT ACAGAGTGTAGTACTGAAAATAAAATCGATGCG…	CACGTGGGTAATCTTCCTCTGAGTCTGGGATAACTTTCCGAAAGGGAAGCTAATACTGGA TGGTCCCGAGAGATCACAAGATTTTTCGGGTAAAGATTTATTGCTCGGAGATGAGCCCGC GTCCGATTAGCTAGTTGGTGAGGTAAAGGCTCACCAAGGCGACGATCGGTAGCCGGCCTG AGAGGGTGTTCGGCCACAATGGAACTGAGACACGGTCCATACTCCTACGGGAGGCAGCAG TTAAGAATCTTGCTCAATGGGGGGAACCCTGAAGCAGCGACGCCGCGTGAACGATGAAGG TCTTCGGATTGTAAAGTTCAGTAAGCAGGGAAAAATAAGCAGCAATGTGATGATGGTACC TGCCTAAAGCACCGGCTAACTACGTGCCAGCAG…	ATGCCGATCATTTTTGCTTCGTCTTTGATTTTATTTCCTCAGACGATTATTCAATGGTTA TCTAATAGTAGTCAAGAATGGGCTGGATGGGCAGTGATTATGGATTTTTTTAATCCATTC TCTCAGATTTGGTATCATGCGTTATTTTATTTCGTAATTTATACCGCTTTAATTGTATTC TTTGCTTACTTTTATACAGCGATTCAGTTTAATCCTGCAGAATTGGCTGAGAATTTGAAA AAATACGGTGGATTCATTCCAGGAATTCGTCCGGGTTCTCACACAAAAGAATATATTGAA AAAGTGTTAAATAGAATCACTCTTCCCGGAGCTATGTTTCTTGCAGGTTTGGCATTAGCA CCTTATATTATTATAAAATTCTTAGATTTGAGC…
126	VC36	L.interrogans	Central India(MD)	Human clinical	CTTTCTATTCCTCAGATTTCTACAGGAGATATTTTACGCGAGGCAGTAAAGAATCAAACT GCGATGGGAATAGAAGCAAAACGTTATATGGATGCGGGAGATTTGGTTCCAGATTCCGTA GTGATTGGAATCATAAAAGATCGCATTCGAGAAGCGGATTGTAAAAATGGATTTTTGTTG GATGGATTTCCGAGAACCGTGGAACAAGCGGAAGCTTTAGATACACTTTTAAAAAATGAA GGCAAGTCTATTGATAAAGCGATTAATCTTCAGGTTCCGGATGCGGAACTCTTAAAGAGA TTACTCGGCCGTGCAGAAATAGAAGGTCGCGCGGACGATAACGAAGTGACGATTAAAAAT CGTCTCGATAATTATAATAAGAAGACCTTACCT…	TATCTCGATATAGAACTGGATTATTATGATTTAGGCGTGGAGTACAGGGACAAAACGGAT GATAAAGTAACTGTGGATTCTGCTCACGCGATTCAAAAATATGGAGTAGGCGTAAAATGT GCGACGATTACTCCTAACCAAGATAGAGTTAAAGAATACAATCTCAAACAAGAATGGAAA TCTCCGAACGGAACCATTCGTTCTATTTTAGACGGAACCGTTTTTCGTAAACCGATCATC GTAAAAAATATTCCTCCTGCGGTTCGTTCTTGGAAAAAACCGATTACAGTAGGACGTCAC GCTTACGGAGATCTTTATAAGGACACAGAACTTTATATTCCCGAAGCCGGAAAGGTGGAA CTCGTTTATACCGGAAAGGACGGAAAAGAAAAA…	ATCTCCGTTGCACTCTTTGCAAGCATTACCGCTTCTGGTGCTTTCGGTGGTCTGCCAAGC CTAAAAAGCTCTTTTGTTCTGAGCGAGGACACAATCCCAGGGACAAACGAAACCGTAAAA ACGTTACTTCCCTACGGATCTGTGATCAACTATTACGGATACGTAAAGCCAGGACAAGCG CCGGACGGTTTAGTCGATGGAAACAAAAAAGCATACTATCTCTATGTTTGGATTCCTGCC GTAATCGCTGAAATGGGAGTTCGTATGATTTCCCCAACAGGCGAAATCGGTGAACCAGGC GACGGAGACTTAGTAAGCGACGCTTTCAAAGCGGCTACCCCAGAAGAAAAATCAATGCCA CATTGGTTTGATACTTGGATCCGTGTAGAAAGA…	GGAAATTGCGCAGCTACAGTCGATGTAGAATATCCGGTATTCCCGAAAGATAAAGAAGGC CGTGCACTTCAGAAATTCCTCGGAACCATTCGTAACGTAGGTTTGGCCGTTGAAGCTCCT AAAAAAAGTCTTTGGGAAGCAATTTTCGGTGAAGGTTCCAGCTTTATCGATCAGATGCCT TCTAAAGTTTTCGAGGCGTTTGACAAAGAATCTTATTACAAACTTACCGACCTAAGCAAA CGTGCAGACGCAATCAACGAAGCAAGTCTTTCTCTTACAGGAATCACTAAAAATAGAGCG AAGATCGGAAATCTGATTGGAGCGGAAGCAATTCTATACATAGGTTACCAAAAACCTTAT ACAGAGTGTAGTACTGAAAATAAAATCGATGCG…	CACGTGGGTAATCTTCCTCTGAGTCTGGGATAACTTTCCGAAAGGGAAGCTAATACTGGA TGGTCCCGAGAGATCACAAGATTTTTCGGGTAAAGATTTATTGCTCGGAGATGAGCCCGC GTCCGATTAGCTAGTTGGTGAGGTAAAGGCTCACCAAGGCGACGATCGGTAGCCGGCCTG AGAGGGTGTTCGGCCACAATGGAACTGAGACACGGTCCATACTCCTACGGGAGGCAGCAG TTAAGAATCTTGCTCAATGGGGGGAACCCTGAAGCAGCGACGCCGCGTGAACGATGAAGG TCTTCGGATTGTAAAGTTCAGTAAGCAGGGAAAAATAAGCAGCAATGTGATGATGGTACC TGCCTAAAGCACCGGCTAACTACGTGCCAGCAG…	ATGCCGATCATTTTTGCTTCGTCTTTGATTTTATTTCCTCAGACGATTATTCAATGGTTA TCTAATAGTAGTCAAGAATGGGCTGGATGGGCAGTGATTATGGATTTTTTTAATCCATTC TCTCAGATTTGGTATCATGCGTTATTTTATTTCGTAATTTATACCGCTTTAATTGTATTC TTTGCTTACTTTTATACAGCGATTCAGTTTAATCCTGCAGAATTGGCTGAGAATTTGAAA AAATACGGTGGATTCATTCCAGGAATTCGTCCGGGTTCTCACACAAAAGAATATATTGAA AAAGTGTTAAATAGAATCACTCTTCCCGGAGCTATGTTTCTTGCAGGTTTGGCATTAGCA CCTTATATTATTATAAAATTCTTAGATTTGAGC…
127	VC37	L.interrogans	South India(KE)	Human clinical	CTTTCTATCCCTCAGATTTCCACAGGCGATATTCTCCGCGAAGCGGTAAAGAATCAAACT GAGATGGGAATCGAAGCAAAACGTTATATGGATGCAGGTGATCTGGTACCTGATTCTGTT GTGATCGGAATCATCAAAGATCGTATCCGTGAAGCGGATTGCAGAAATGGGTTTTTATTG GATGGATTTCCAAGAACTGTAGAACAGGCGGAAGCTTTAGATACACTTTTAAAAAATGAA GGTAGGTCTATTGATAAAGCGATTAATCTTCAGGTTCCGGATGCGGAACTTTTAAAAAGA TTACTCAGCCGTGCAGAAATTGAAGGCCGTGCGGACGATAACGAAGTGACGATTAAAAAT CGTCTAGATAATTATAACAAGAAGACTTTACCT…	TATCTCGATATAGAACTGGACTATTATGATTTAGGTGTGGAATACAGAGACAAAACGGAT GATAAAGTTACTGTGGATTCTGCTCACGCGATTCAAAAATACGGAGTAGGCGTAAAATGT GCGACGATTACTCCTAACCAAGATAGAGTTAAAGAATACAATCTCAAACAAGAATGGAAA TCTCCGAACGGAACCATTCGTTCTATTTTAGACGGAACCGTTTTTCGTAAACCGATCATC GTAAAAAACATTCCTCCTGCGGTTCGTTCTTGGAAAAAACCAATTACGGTAGGACGTCAC GCCTACGGAGATCTTTATAAGGACACAGAACTTTATATTCCCGAAGCCGGAAAAGTGGAA CTCGTTTATACCGGCAAGGACGGAAAAGAAAAA…	ATCTCCGTTGCACTCTTTGCAAGCATTACCGCTTCTGGTGCTTTCGGTGGTCTGCCAAGC CTAAAAAGCTCTTTTGTTCTGAGCGAGGACACAATCCCAGGGACAAACGAAACCGTAAAA ACGTTACTTCCCTACGGATCTGTGATCAACTATTACGGATACGTAAAGCCAGGACAAGCG CCGGACGGTTTAGTCGATGGAAACAAAAAAGCATACTATCTCTATGTTTGGATTCCTGCC GTAATCGCTGAAATGGGAGTTCGTATGATTTCCCCAACAGGCGAAATCGGTGAACCAGGC GATGGAGACTTAGTAAGCGACGCTTTCAAAGCGGCTACCCCAGAAGAAAAATCAATGCCA CATTGGTTTGATACTTGGATCCGTGTAGAAAGA…	GGAAATTGCGCAGCTACAGTCGATGTAGAATATCCGGTATTCCCGAAAGATAAAGAAGGC CGTGCACTTCAAAAATTCCTCGGAACCATTCGTAACGTAGGTTTGGCTGTAGAAGCTCCT AAAAAAAGTCTTTGGGAAGCGATCTTCGGTGAAGGTTCCAGCTTTATTGATCAGATGCCT TCTAAAGTTTTCGAGGCGTTTGACAAAGAGTCTTATTACAAACTTACCGACCTGAGCAAA CGTGCAGACGCAATCAACGAAGCGAGTCTTTCTCTTACAGGAATTACTAAAAACAGAGCA AAGATCGGAAATCTGATCGGAGCAGAAGCAATTCTATACATAGGTTATCAAAAACCTTAT ACAGAGTGTAGTACTGAAAATAAAGTCGATGCG…	CACGTGGGTAATCTTCCTCTGAGTCTGGGATAACTTTTCAAAAGGGAAGCTAATACTGGA TGGTCCCGAGAGATCACAAGATTTTTCGGGTAAAGATTTATTGCTCGGAGATGAGCCCGC GTCCGATTATCTAGTTGGTGAGGTAAAGGCTCACCAAGGCGACGATCGGTAGCCGGCCTG AGAGGGTGTTCGGCCACTATGGAACTGAGACACGATCCATACTCCTACGGGAGGCAGCAG TTAAGAATCTTGCTCAATGGGGGGAACCCTGAAGCAGCGACGCCGCGTGAACAATGAAAG TCTTCGGATTGTAAAGTTCAGTAAGCAGGGAAAAATAAGCAGCAATGTGATGATGGTACC TGCCTAAAGCACCGGCTAACTACGTGCCAGCAG…	ATGCCGATCATTTTTGCTTCTTCTTTGATCTTGTTTCCGCAGACGATCATTCAGTGGTTG TCTTCCAGCAGCGAACAGTGGGCCGGTTGGGCGATCATTATGGACTTTTTCAATCCGTTC TCCCAGATCTGGTATCACGCGTTGTTCTACTATGTAATCTATACTTCTTTGATTATCTTT TTCGCATACTTTTATACCGCAATTCAGTTTAACCCGGCTGAGTTGGCTGAAAACCTGAAG AAATACGGCGGATTCATTCCGGGAATTCGTCCGGGTTCTCACACAAAAGAATATATCGAA AAAGTGTTAAATAGGATCACTCTTCCGGGAGCTATGTTTCTCGCTGGATTGGCATTAGCA CCTTATATTATTATAAAATTCTTAGATTTGAGC…
128	VC38	L.interrogans	South India(KE)	Human clinical	CTTTCTATTCCTCAGATTTCTACAGGAGATATTTTACGCGAGGCAGTAAAGAATCAAACT GCGATGGGAATAGAAGCAAAACGTTATATGGATGCGGGAGATTTGGTTCCAGATTCCGTA GTGATTGGAATCATAAAAGATCGCATTCGAGAAGCGGATTGTAAAAATGGATTTTTGTTG GATGGATTTCCGAGAACCGTGGAACAAGCGGAAGCTTTAGATACACTTTTAAAAAATGAA GGCAAGTCTATTGATAAAGCGATTAATCTTCAGGTTCCGGATGCGGAACTCTTAAAGAGA TTACTCGGCCGTGCAGAAATAGAAGGTCGCGCGGACGATAACGAAGTGACGATTAAAAAT CGTCTCGATAATTATAATAAGAAGACCTTACCT…	TATCTCGATATAGAACTGGATTATTATGATTTAGGCGTGGAGTACAGAGACAAAACGGAT GATAAAGTAACTGTGGATTCTGCTCACGCGATTCAAAAATATGGAGTAGGCGTAAAATGT GCGACGATTACTCCTAACCAAGATAGAGTTAAAGAATACAATCTCAAACAAGAATGGAAA TCTCCGAACGGAACCATTCGTTCTATTTTAGACGGAACCGTTTTTCGTAAACCGATCATC GTAAAAAATATTCCTCCTGCGGTTCGTTCTTGGAAAAAACCGATTACAGTAGGACGTCAC GCTTACGGAGATCTTTATAAGGACACAGAACTTTATATTCCCGAAGCCGGAAAGGTGGAA CTCGTTTATACCGGAAAGGACGGAAAAGAAAAA…	ATCTCCGTTGCACTCTTTGCAAGCATTACCGCTTCTGGTGCTTTCGGTGGTCTGCCAAGC CTAAAAAGCTCTTTTGTTCTGAGCGAGGACACAATCCCAGGGACAAACGAAACCGTAAAA ACGTTACTTCCCTACGGATCTGTGATCAACTATTACGGATACGTAAAGCCAGGACAAGCG CCGGACGGTTTAGTCGATGGAAACAAAAAAGCATACTATCTCTATGTTTGGATTCCTGCC GTAATCGCTGAAATGGGAGTTCGTATGATTTCCCCAACAGGCGAAATCGGTGAGCCAGGC GACGGAGACTTAGTAAGCGACGCTTTCAAAGCGGCTACCCCAGAAGAAAAATCAATGCCA CATTGGTTTGATACTTGGATCCGTGTAGAAAGA…	GGAAATTGCGCAGCTACAGTCGATGTAGAATATCCGGTATTCCCGAAAGATAAAGAAGGC CGTGCCATTCAGAAATTCCTCGGTTCCATTCGTAACGTAGGTTTGGCCGTTGAAGCTCCT AAAAAAAGTCTTTGGGAAGCAATTTTCGGTGAAGGTTCCAGCTTTATCGATCAGATGCCT TCTAAAGTTTTCGAGGCGTTTGACAAAGAATCTTATTACAAACTTACCGACCTAAGCAAA CGTGCAGACGCAATCAACGAAGCAAGTCTTTCTCTTACAGGAATCACTAAAAATAGAGCG AAGATCGGAAATCTGATTGGAGCGGAAGCAATTCTATACATAGGTTACCAAAAACCTTAT ACAGAGTGTAGTACTGAAAATAAAATCGATGCG…	CACGTGGGTAATCTTCCTCTGAGTCTGGGATAACTTTCCGAAAGGGAAGCTAATACTGGA TGGTCCCGAGAGATCATAAGATTTTTCGGGTAAAGATTTATTGCTCGGAGATGAGCCCGC GTCCGATTAGCTAGTTGGTGAGGTAAAGGCTCACCAAGGCGACGATCGGTAGCCGGCCTG AGAGGGTGTTCGGCCACAATGGAACTGAGACACGGTCCATACTCCTACGGGAGGCAGCAG TTAAGAATCTTGCTCAATGGGGGGAACCCTGAAGCAGCGACGCCGCGTGAACGATGAAGG TCTTCGGATTGTAAAGTTCAGTAAGCAGGGAAAAATAAGCAGCAATGTGATGATGGTACC TGCCTAAAGCACCGGCTAACTACGTGCCAGCAG…	ATGCCGATCATTTTTGCTTCGTCTTTGATTTTATTTCCTCAGACGATTATTCAATGGTTA TCTAATAGTAGTCAAGAATGGGCTGGATGGGCAGTGATTATGGATTTTTTTAATCCATTC TCTCAGATTTGGTATCATGCGTTATTTTATTTCGTAATTTATACCGCTTTAATTGTATTC TTTGCTTACTTTTATACAGCGATTCAGTTTAATCCTGCAGAATTGGCTGAGAATTTGAAA AAATACGGTGGATTCATTCCAGGAATTCGTCCGGGTTCTCACACAAAAGAATATATTGAA AAAGTGTTAAATAGAATCACTCTTCCCGGAGCTATGTTTCTTGCAGGTTTGGCATTAGCA CCTTATATTATTATAAAATTCTTAGATTTGAGC…
129	VC39	L.interrogans	South India(KR)	Human clinical	CTTTCTATTCCTCAGATTTCTACAGGAGATATTTTACGCGAGGCAGTAAAGAATCAAACT GCGATGGGAATAGAAGCAAAACGTTATATGGATGCGGGAGATTTGGTTCCAGATTCCGTA GTGATTGGAATCATAAAAGATCGCATTCGAGAAGCGGATTGTAAAAATGGATTTTTGTTG GATGGATTTCCGAGAACCGTGGAACAAGCGGAAGCTTTAGATACACTTTTAAAAAATGAA GGCAAGTCTATTGATAAAGCGATTAATCTTCAGGTTCCGGATGCGGAACTCTTAAAGAGA TTACTCGGCCGTGCAGAAATAGAAGGTCGCGCGGACGATAACGAAGTGACGATTAAAAAT CGTCTCGATAATTATAATAAGAAGACCTTACCT…	TATCTCGATATAGAACTGGATTATTATGATTTAGGCGTGGAGTACAGGGACAAAACGGAT GATAAAGTAACCGTGGATTCTGCTCACGCGATTCAAAAATATGGAGTAGGCGTAAAATGT GCGACGATTACTCCTAACCAAGATAGAGTTAAAGAATACAATCTCAAACAAGAATGGAAA TCTCCGAACGGAACCATTCGTTCTATTTTAGACGGAACCGTTTTTCGTAAACCGATCATC GTAAAAAATATTCCTCCTGCGGTTCGTTCTTGGAAAAAACCGATTACAGTAGGACGTCAC GCTTACGGAGATCTTTATAAGGACACAGAACTTTATATTCCCGAAGCCGGAAAGGTGGAA CTCGTTTATACCGGAAAGGACGGAAAAGAAAAA…	ATCTCCGTTGCACTCTTTGCAAGCATTACCGCTTCTGGTGCTTTCGGTGGTCTGCCAAGC CTAAAAAGCTCTTTTGTTCTGAGCGAGGACACAATCCCAGGGACAAACGAAACCGTAAAA ACGTTACTTCCCTACGGATCTGTGATCAACTATTACGGATACGTAAAGCCAGGACAAGCG CCGGACGGTTTAGTCGATGGAAACAAAAAAGCATACTATCTCTATGTTTGGATTCCTGCC GTAATCGCTGAAATAGGAGTTCGTATGATTTCCCCAACAGGCGAAATCGGTGAACCAGGC GACGGAGACTTAGTAAGCGACGCTTTCAAAGCGGCTACCCCAGAAGAAAAATCAATGCCA CATTGGTTTGATACTTGGATCCGTGTAGAAAGA…	GGAAATTGCGCAGCTACAGTCGATGTAGAATATCCGGTATTCCCGAAAGATAAAGAAGGC CGTGCACTTCAGAAATTCCTCGGAACCATTCGTAACGTAGGTTTGGCTGTTGAAGCTCCT AAAAAAAGTCTTTGGGAAGCAATTTTCGGTGAAGGTTCCAGCTTTATCGATCAGATGCCT TCTAAAGTTTTCGAGGCGTTTGACAAAGAATCTTATTACAAACTTACCGACCTAAGCAAA CGTGCAGACGCAATCAACGAAGCAAGTCTTTCTCTTACAGGAATCACTAAAAATAGAGCG AAGATCGGAAATCTGATTGGAGCGGAAGCAATTCTATACATAGGTTACCAAAAACCTTAT ACAGAGTGTAGTACTGAAAATAAAATCGATGCG…	CACGTGGGTAATCTTCCTCTGAGTCTGGGATAACTTTCCGAAAGGGAAGCTAATACTGGA TGGTCCCGAGAGATCACAAGATTTTTCGGGTAAAGATTTATTGCTCGGAGATGAGCCCGC GTCCGATTAGCTAGTTGGTGAGGTAAAGGCTCACCAAGGCGACGATCGGTAGCCGGCCTG AGAGGGTGTTCGGCCACAATGGAACTGAGACACGGTCCATACTCCTACGGGAGGCAGCAG TTAAGAATCTTGCTCAATGGGGGGAACCCTGAAGCAGCGACGCCGCGTGAACGATGAAGG TCTTCGGATTGTAAAGTTCAGTAAGCAGGGAAAAATAAGCAGCAATGTGATGATGGTACC TGCCTAAAGCACCGGCTAACTACGTGCCAGCAG…	ATGCCGATCATTTTTGCTTCGTCTTTGATTTTATTTCCTCAGACGATTATTCAATGGTTA TCTAATAGTAGTCAAGAATGGGCTGGATGGGCAGTGATTATGGATTTTTTTAATCCATTC TCTCAGATTTGGTATCATGCGTTATTTTATTTCGTAATTTATACCGCTTTAATTGTATTC TTTGCTTACTTTTATACAGCGATTCAGTTTAATCCTGCAGAATTGGCTGAGAATTTGAAA AAATACGGTGGATTCATTCCAGGAATTCGTCCGGGTTCTCACACAAAAGAATATATTGAA AAAGTGTTAAATAGAATCACTCTTCCCGGAGCTATGTTTCTTGCAGGTTTGGCATTAGCA CCTTATATTATTATAAAATTCTTAGATTTGAGC…
130	VC40	L.interrogans	South India(KR)	Human clinical	CTTTCTATTCCTCAGATTTCTACAGGAGATATTTTACGCGAGGCAGTAAAGAATCAAACT GCGATGGGAATAGAAGCAAAACGTTATATGGATGCGGGAGATTTGGTTCCAGATTCCGTA GTGATTGGAATCATAAAAGATCGCATTCGAGAAGCGGATTGTAAAAATGGATTTTTGTTG GATGGATTTCCGAGAACCGTGGAACAAGCGGAAGCTTTAGATACACTTTTAAAAAATGAA GGCAAGTCTATTGATAAAGCGATTAATCTTCAGGTTCCGGATGCGGAACTCTTAAAGAGA TTACTCGGCCGTGCAGAAATAGAAGGTCGCGCGGACGATAACGAAGTGACGATTAAAAAT CGTCTCGATAATTATAATAAGAAGACCTTACCT…	TATCTCGATATAGAACTGGATTATTATGATTTAGGCGTGGAGTACAGGGACAAAACGGAT GATAAAGTAACCGTGGATTCTGCTCACGCGATTCAAAAATATGGAGTAGGCGTAAAATGT GCGACGATTACTCCTAACCAAGATAGAGTTAAAGAATACAATCTCAAACAAGAATGGAAA TCTCCGAACGGAACCATTCGTTCTATTTTAGACGGAACCGTTTTTCGTAAACCGATCATC GTAAAAAATATTCCTCCTGCGGTTCGTTCTTGGAAAAAACCGATTACAGTAGGACGTCAC GCTTACGGAGATCTTTATAAGGACACAGAACTTTATATTCCCGAAGCCGGAAAGGTGGAA CTCGTTTATACCGGAAAGGACGGAAAAGAAAAA…	ATCTCCGTTGCACTCTTTGCAAGCATTACCGCTTCTGGTGCTTTCGGTGGTCTGCCAAGC CTAAAAAGCTCTTTTGTTCTGAGCGAGGACACAATCCCAGGGACAAACGAAACCGTAAAA ACGTTACTTCCCTACGGATCTGTGATCAACTATTACGGATACGTAAAGCCAGGACAAGCG CCGGACGGTTTAGTCGATGGAAACAAAAAAGCATACTATCTCTATGTTTGGATTCCTGCC GTAATCGCTGAAATAGGAGTTCGTATGATTTCCCCAACAGGCGAAATCGGTGAACCAGGC GACGGAGACTTAGTAAGCGACGCTTTCAAAGCGGCTACCCCAGAAGAAAAATCAATGCCA CATTGGTTTGATACTTGGATCCGTGTAGAAAGA…	GGAAATTGCGCAGCTACAGTCGATGTAGAATATCCGGTATTCCCGAAAGATAAAGAAGGC CGTGCACTTCAGAAATTCCTCGGAACCATTCGTAACGTAGGTTTGGCTGTTGAAGCTCCT AAAAAAAGTCTTTGGGAAGCAATTTTCGGTGAAGGTTCCAGCTTTATCGATCAGATGCCT TCTAAAGTTTTCGAGGCGTTTGACAAAGAATCTTATTACAAACTTACCGACCTAAGCAAA CGTGCAGACGCAATCAACGAAGCAAGTCTTTCTCTTACAGGAATCACTAAAAATAGAGCG AAGATCGGAAATCTGATTGGAGCGGAAGCAATTCTATACATAGGTTACCAAAAACCTTAT ACAGAGTGTAGTACTGAAAATAAAATCGATGCG…	CACGTGGGTAATCTTCCTCTGAGTCTGGGATAACTTTCCGAAAGGGAAGCTAATACTGGA TGGTCCCGAGAGATCACAAGATTTTTCGGGTAAAGATTTATTGCTCGGAGATGAGCCCGC GTCCGATTAGCTAGTTGGTGAGGTAAAGGCTCACCAAGGCGACGATCGGTAGCCGGCCTG AGAGGGTGTTCGGCCACAATGGAACTGAGACACGGTCCATACTCCTACGGGAGGCAGCAG TTAAGAATCTTGCTCAATGGGGGGAACCCTGAAGCAGCGACGCCGCGTGAACGATGAAGG TCTTCGGATTGTAAAGTTCAGTAAGCAGGGAAAATTAAGCAGCAATGTGATGATGGTACC TGCCTAAAGCACCGGCTAACTACGTGCCAGCAG…	ATGCCGATCATTTTTGCTTCGTCTTTGATTTTATTTCCTCAGACGATTATTCAATGGTTA TCTAATAGTAGTCAAGAATGGGCTGGATGGGCAGTGATTATGGATTTTTTTAATCCATTC TCTCAGATTTGGTATCATGCGTTATTTTATTTCGTAATTTATACCGCTTTAATTGTATTC TTTGCTTACTTTTATACAGCGATTCAGTTTAATCCTGCAGAATTGGCTGAGAATTTGAAA AAATACGGTGGATTCATTCCAGGAATTCGTCCGGGTTCTCACACAAAAGAATATATTGAA AAAGTGTTAAATAGAATCACTCTTCCCGGAGCTATGTTTCTTGCAGGTTTGGCATTAGCA CCTTATATTATTATAAAATTCTTAGATTTGAGC…
131	VC41	L.interrogans	South India(KR)	Human clinical	CTTTCTATTCCTCAGATTTCTACAGGAGATATTTTACGCGAGGCAGTAAAGAATCAAACT GCGATGGGAATAGAAGCAAAACGTTATATGGATGCGGGAGATTTGGTTCCAGATTCCGTA GTGATTGGAATCATAAAAGATCGCATTCGAGAAGCGGATTGTAAAAATGGATTTTTGTTG GATGGATTTCCGAGAACCGTGGAACAAGCGGAAGCTTTAGATACACTTTTAAAAAATGAA GGCAAGTCTATTGATAAAGCGATTAATCTTCAGGTTCCGGATGCGGAACTCTTAAAGAGA TTACTCGGCCGTGCAGAAATAGAAGGTCGCGCGGACGATAACGAAGTGACGATTAAAAAT CGTCTCGATAATTATAATAAGAAGACCTTACCT…	TATCTCGATATAGAACTGGATTATTATGATTTAGGCGTGGAGTACAGGGACAAAACGGAT GATAAAGTAACCGTGGATTCTGCTCACGCGATTCAAAAATATGGAGTAGGCGTAAAATGT GCGACGATTACTCCTAACCAAGATAGAGTTAAAGAATACAATCTCAAACAAGAATGGAAA TCTCCGAACGGAACCATTCGTTCTATTTTAGACGGAACCGTTTTTCGTAAACCGATCATC GTAAAAAATATTCCTCCTGCGGTTCGTTCTTGGAAAAAACCGATTACAGTAGGACGTCAC GCTTACGGAGATCTTTATAAGGACACAGAACTTTATATTCCCGAAGCCGGAAAGGTGGAA CTCGTTTATACCGGAAAGGACGGAAAAGAAAAA…	ATCTCCGTTGCACTCTTTGCAAGCATTACCGCTTCTGGTGCTTTCGGTGGTCTGCCAAGC CTAAAAAGCTCTTTTGTTCTGAGCGAGGACACAATCCCAGGGACAAACGAAACCGTAAAA ACGTTACTTCCCTACGGATCTGTGATCAACTATTACGGATACGTAAAGCCAGGACAAGCG CCGGACGGTTTAGTCGATGGAAACAAAAAAGCATACTATCTCTATGTTTGGATTCCTGCC GTAATCGCTGAAATAGGAGTTCGTATGATTTCCCCAACAGGCGAAATCGGTGAACCAGGC GACGGAGACTTAGTAAGCGACGCTTTCAAAGCGGCTACCCCAGAAGAAAAATCAATGCCA CATTGGTTTGATACTTGGATCCGTGTAGAAAGA…	GGAAATTGCGCAGCTACAGTCGATGTAGAATATCCGGTATTCCCGAAAGATAAAGAAGGC CGTGCACTTCAGAAATTCCTCGGAACCATTCGTAACGTAGGTTTGGCTGTTGAAGCTCCT AAAAAAAGTCTTTGGGAAGCAATTTTCGGTGAAGGTTCCAGCTTTATCGATCAGATGCCT TCTAAAGTTTTCGAGGCGTTTGACAAAGAATCTTATTACAAACTTACCGACCTAAGCAAA CGTGCAGACGCAATCAACGAAGCAAGTCTTTCTCTTACAGGAATCACTAAAAATAGAGCG AAGATCGGAAATCTGATTGGAGCGGAAGCAATTCTATACATAGGTTACCAAAAACCTTAT ACAGAGTGTAGTACTGAAAATAAAATCGATGCG…	CACGTGGGTAATCTTCCTCTGAGTCTGGGATAACTTTCCGAAAGGGAAGCTAATACTGGA TGGTCCCGAGAGATCACAAGATTTTTCGGGTAAAGATTTATTGCTCGGAGATGAGCCCGC GTCCGATTAGCTAGTTGGTGAGGTAAAGGCTCACCAAGGCGACGATCGGTAGCCGGCCTG AGAGGGTGTTCGGCCACAATGGAACTGAGACACGGTCCATACTCCTACGGGAGGCAGCAG TTAAGAATCTTGCTCAATGGGGGGAACCCTGAAGCAGCGACGCCGCGTGAACGATGAAGG TCTTCGGATTGTAAAGTTCAGTAAGCAGGGAAAATTAAGCAGCAATGTGATGATGGTACC TGCCTAAAGCACCGGCTAACTACGTGCCAGCAG…	ATGCCGATCATTTTTGCTTCGTCTTTGATTTTATTTCCTCAGACGATTATTCAATGGTTA TCTAATAGTAGTCAAGAATGGGCTGGATGGGCAGTGATTATGGATTTTTTTAATCCATTC TCTCAGATTTGGTATCATGCGTTATTTTATTTCGTAATTTATACCGCTTTAATTGTATTC TTTGCTTACTTTTATACAGCGATTCAGTTTAATCCTGCAGAATTGGCTGAGAATTTGAAA AAATACGGTGGATTCATTCCAGGAATTCGTCCGGGTTCTCACACAAAAGAATATATTGAA AAAGTGTTAAATAGAATCACTCTTCCCGGAGCTATGTTTCTTGCAGGTTTGGCATTAGCA CCTTATATTATTATAAAATTCTTAGATTTGAGC…
132	VC42	L.interrogans	South India(KR)	Human clinical	CTTTCTATTCCTCAGATTTCTACAGGAGATATTTTACGCGAGGCAGTAAAGAATCAAACT GCGATGGGAATAGAAGCAAAACGTTATATGGATGCGGGAGATTTGGTTCCAGATTCCGTA GTGATTGGAATCATAAAAGATCGCATTCGAGAAGCGGATTGTAAAAATGGATTTTTGTTG GATGGATTTCCGAGAACCGTGGAACAAGCGGAAGCTTTAGATACACTTTTAAAAAATGAA GGCAAGTCTATTGATAAAGCGATTAATCTTCAGGTTCCGGATGCGGAACTCTTAAAGAGA TTACTCGGCCGTGCAGAAATAGAAGGTCGCGCGGACGATAACGAAGTGACGATTAAAAAT CGTCTCGATAATTATAATAAGAAGACCTTACCT…	TATCTCGATATAGAACTGGATTATTATGATTTAGGCGTGGAGTACAGGGACAAAACGGAT GATAAAGTAACCGTGGATTCTGCTCACGCGATTCAAAAATATGGAGTAGGCGTAAAATGT GCGACGATTACTCCTAACCAAGATAGAGTTAAAGAATACAATCTCAAACAAGAATGGAAA TCTCCGAACGGAACCATTCGTTCTATTTTAGACGGAACCGTTTTTCGTAAACCGATCATC GTAAAAAATATTCCTCCTGCGGTTCGTTCTTGGAAAAAACCGATTACAGTAGGACGTCAC GCTTACGGAGATCTTTATAAGGACACAGAACTTTATATTCCCGAAGCCGGAAAGGTGGAA CTCGTTTATACCGGAAAGGACGGAAAAGAAAAA…	ATCTCCGTTGCACTCTTTGCAAGCATTACCGCTTCTGGTGCTTTCGGTGGTCTGCCAAGC CTAAAAAGCTCTTTTGTTCTGAGCGAGGACACAATCCCAGGGACAAACGAAACCGTAAAA ACGTTACTTCCCTACGGATCTGTGATCAACTATTACGGATACGTAAAGCCAGGACAAGCG CCGGACGGTTTAGTCGATGGAAACAAAAAAGCATACTATCTCTATGTTTGGATTCCTGCC GTAATCGCTGAAATAGGAGTTCGTATGATTTCCCCAACAGGCGAAATCGGTGAACCAGGC GACGGAGACTTAGTAAGCGACGCTTTCAAAGCGGCTACCCCAGAAGAAAAATCAATGCCA CATTGGTTTGATACTTGGATCCGTGTAGAAAGA…	GGAAATTGCGCAGCTACAGTCGATGTAGAATATCCGGTATTCCCGAAAGATAAAGAAGGC CGTGCACTTCAGAAATTCCTCGGAACCATTCGTAACGTAGGTTTGGCTGTTGAAGCTCCT AAAAAAAGTCTTTGGGAAGCAATTTTCGGTGAAGGTTCCAGCTTTATCGATCAGATGCCT TCTAAAGTTTTCGAGGCGTTTGACAAAGAATCTTATTACAAACTTACCGACCTAAGCAAA CGTGCAGACGCAATCAACGAAGCAAGTCTTTCTCTTACAGGAATCACTAAAAATAGAGCG AAGATCGGAAATCTGATTGGAGCGGAAGCAATTCTATACATAGGTTACCAAAAACCTTAT ACAGAGTGTAGTACTGAAAATAAAATCGATGCG…	CACGTGGGTAATCTTCCTCTGAGTCTGGGATAACTTTCCGAAAGGGAAGCTAATACTGGA TGGTCCCGAGAGATCACAAGATTTTTCGGGTAAAGATTTATTGCTCGGAGATGAGCCCGC GTCCGATTAGCTAGTTGGTGAGGTAAAGGCTCACCAAGGCGACGATCGGTAGCCGGCCTG AGAGGGTGTTCGGCCACTATGGAACTGAGACACGGTCCATACTCCTACGGGAGGCAGCAG TTAAGAATCTTGCTCAATGGGGGGAACCCTGAAGCAGCGACGCCGCGTGAACGATGAAGG TCTTCGGATTGTAAAGTTCAGTAAGCAGGGAAAATTAAGCAGCAATGTGATGATGGTACC TGCCTAAAGCACCGGCTAACTACGTGCCAGCAG…	ATGCCGATCATTTTTGCTTCGTCTTTGATTTTATTTCCTCAGACGATTATTCAATGGTTA TCTAATAGTAGTCAAGAATGGGCTGGATGGGCAGTGATTATGGATTTTTTTAATCCATTC TCTCAGATTTGGTATCATGCGTTATTTTATTTCGTAATTTATACCGCTTTAATTGTATTC TTTGCTTACTTTTATACAGCGATTCAGTTTAATCCTGCAGAATTGGCTGAGAATTTGAAA AAATACGGTGGATTCATTCCAGGAATTCGTCCGGGTTCTCACACAAAAGAATATATTGAA AAAGTGTTAAATAGAATCACTCTTCCCGGAGCTATGTTTCTTGCAGGTTTGGCATTAGCA CCTTATATTATTATAAAATTCTTAGATTTGAGC…
133	VC43	L.interrogans	South India(KR)	Human clinical	CTTTCTATTCCTCAGATTTCTACAGGAGATATTTTACGCGAGGCAGTAAAGAATCAAACT GCGATGGGAATAGAAGCAAAACGTTATATGGATGCGGGAGATTTGGTTCCAGATTCCGTA GTGATTGGAATCATAAAAGATCGCATTCGAGAAGCGGATTGTAAAAATGGATTTTTGTTG GATGGATTTCCGAGAACCGTGGAACAAGCGGAAGCTTTAGATACACTTTTAAAAAATGAA GGCAAGTCTATTGATAAAGCGATTAATCTTCAGGTTCCGGATGCGGAACTCTTAAAGAGA TTACTCGGCCGTGCAGAAATAGAAGGTCGCGCGGACGATAACGAAGTGACGATTAAAAAT CGTCTCGATAATTATAATAAGAAGACCTTACCT…	TATCTCGATATAGAACTGGATTATTATGATTTAGGCGTGGAGTACAGGGACAAAACGGAT GATAAAGTAACCGTGGATTCTGCTCACGCGATTCAAAAATATGGAGTAGGCGTAAAATGT GCGACGATTACTCCTAACCAAGATAGAGTTAAAGAATACAATCTCAAACAAGAATGGAAA TCTCCGAACGGAACCATTCGTTCTATTTTAGACGGAACCGTTTTTCGTAAACCGATCATC GTAAAAAATATTCCTCCTGCGGTTCGTTCTTGGAAAAAACCGATTACAGTAGGACGTCAC GCTTACGGAGATCTTTATAAGGACACAGAACTTTATATTCCCGAAGCCGGAAAGGTGGAA CTCGTTTATACCGGAAAGGACGGAAAAGAAAAA…	ATCTCCGTTGCACTCTTTGCAAGCATTACCGCTTCTGGTGCTTTCGGTGGTCTGCCAAGC CTAAAAAGCTCTTTTGTTCTGAGCGAGGACACAATCCCAGGGACAAACGAAACCGTAAAA ACGTTACTTCCCTACGGATCTGTGATCAACTATTACGGATACGTAAAGCCAGGACAAGCG CCGGACGGTTTAGTCGATGGAAACAAAAAAGCATACTATCTCTATGTTTGGATTCCTGCC GTAATCGCTGAAATAGGAGTTCGTATGATTTCCCCAACAGGCGAAATCGGTGAACCAGGC GACGGAGACTTAGTAAGCGACGCTTTCAAAGCGGCTACCCCAGAAGAAAAATCAATGCCA CATTGGTTTGATACTTGGATCCGTGTAGAAAGA…	GGAAATTGCGCAGCTACAGTCGATGTAGAATATCCGGTATTCCCGAAAGATAAAGAAGGC CGTGCACTTCAGAAATTCCTCGGAACCATTCGTAACGTAGGTTTGGCTGTTGAAGCTCCT AAAAAAAGTCTTTGGGAAGCAATTTTCGGTGAAGGTTCCAGCTTTATCGATCAGATGCCT TCTAAAGTTTTCGAGGCGTTTGACAAAGAATCTTATTACAAACTTACCGACCTAAGCAAA CGTGCAGACGCAATCAACGAAGCAAGTCTTTCTCTTACAGGAATCACTAAAAATAGAGCG AAGATCGGAAATCTGATTGGAGCGGAAGCAATTCTATACATAGGTTACCAAAAACCTTAT ACAGAGTGTAGTACTGAAAATAAAATCGATGCG…	CACGTGGGTAATCTTCCTCTGAGTCTGGGATAACTTTCCGAAAGGGAAGCTAATACTGGA TGGTCCCGAGAGATCACAAGATTTTTCGGGTAAAGATTTATTGCTCGGAGATGAGCCCGC GTCCGATTAGCTAGTTGGTGAGGTAAAGGCTCACCAAGGCGACGATCGGTAGCCGGCCTG AGAGGGTGTTCGGCCACTATGGAACTGAGACACGGTCCATACTCCTACGGGAGGCAGCAG TTAAGAATCTTGCTCAATGGGGGGAACCCTGAAGCAGCGACGCCGCGTGAACGATGAAGG TCTTCGGATTGTAAAGTTCAGTAAGCAGGGAAAATTAAGCAGCAATGTGATGATGGTACC TGCCTAAAGCACCGGCTAACTACGTGCCAGCAG…	ATGCCGATCATTTTTGCTTCGTCTTTGATTTTATTTCCTCAGACGATTATTCAATGGTTA TCTAATAGTAGTCAAGAATGGGCTGGATGGGCAGTGATTATGGATTTTTTTAATCCATTC TCTCAGATTTGGTATCATGCGTTATTTTATTTCGTAATTTATACCGCTTTAATTGTATTC TTTGCTTACTTTTATACAGCGATTCAGTTTAATCCTGCAGAATTGGCTGAGAATTTGAAA AAATACGGTGGATTCATTCCAGGAATTCGTCCGGGTTCTCACACAAAAGAATATATTGAA AAAGTGTTAAATAGAATCACTCTTCCCGGAGCTATGTTTCTTGCAGGTTTGGCATTAGCA CCTTATATTATTATAAAATTCTTAGATTTGAGC…
134	VC44	L.interrogans	South India(KE)	Human clinical	CTTTCTATTCCTCAGATTTCTACAGGAGATATTTTACGCGAGGCAGTAAAGAATCAAACT GCGATGGGAATAGAAGCAAAACGTTATATGGATGCGGGAGATTTGGTTCCAGATTCCGTA GTGATTGGAATCATAAAAGATCGCATTCGAGAAGCGGATTGTAAAAATGGATTTTTGTTG GATGGATTTCCGAGAACCGTGGAACAAGCGGAAGCTTTAGATACACTTTTAAAAAATGAA GGCAAGTCTATTGATAAAGCGATTAATCTTCAGGTTCCGGATGCGGAACTCTTAAAGAGA TTACTCGGCCGTGCAGAAATAGAAGGTCGCGCGGACGATAACGAAGTGACGATTAAAAAT CGTCTCGATAATTATAATAAGAAGACCTTACCT…	TATCTCGATATAGAACTGGATTATTATGATTTAGGCGTGGAGTACAGAGACAAAACGGAT GATAAAGTAACTGTGGATTCTGCTCACGCGATTCAAAAATATGGAGTAGGCGTAAAATGT GCGACGATTACTCCTAACCAAGATAGAGTTAAAGAATACAATCTCAAACAAGAATGGAAA TCTCCGAACGGAACCATTCGTTCTATTTTAGACGGAACCGTTTTTCGTAAACCGATCATC GTAAAAAATATTCCTCCTGCGGTTCGTTCTTGGAAAAAACCGATTACAGTAGGACGTCAC GCTTACGGAGATCTTTATAAGGACACAGAACTTTATATTCCCGAAGCCGGAAAGGTGGAA CTCGTTTATACCGGAAAGGACGGAAAAGAAAAA…	ATCTCCGTTGCACTCTTTGCAAGCATTACCGCTTCTGGTGCTTTCGGTGGTCTGCCAAGC CTAAAAAGCTCTTTTGTTCTGAGCGAGGACACAATCCCAGGGACAAACGAAACCGTAAAA ACGTTACTTCCCTACGGATCTGTGATCAACTATTACGGATACGTAAAGCCAGGACAAGCG CCGGACGGTTTAGTCGATGGAAACAAAAAAGCATACTATCTCTATGTTTGGATTCCTGCC GTAATCGCTGAAATGGGAGTTCGTATGATTTCCCCAACAGGCGAAATCGGTGAACCAGGC GACGGAGACTTAGTAAGCGACGCTTTCAAAGCGGCTACCCCAGAAGAAAAATCAATGCCA CATTGGTTTGATACTTGGATCCGTGTAGAAAGA…	GGAAATTGCGCAGCTACAGTCGATGTAGAATATCCGGTATTCCCGAAAGATAAAGAAGGC CGTGCACTTCAGAAATTCCTCGGAACCATTCGTAACGTAGGTTTGGCCGTTGAAGCTCCT AAAAAAAGTCTTTGGGAAGCAATTTTCGGTGAAGGTTCCAGCTTTATCGATCAGATGCCT TCTAAAGTTTTCGAGGCGTTTGACAAAGAATCTTATTACAAACTTACCGACCTAAGCAAA CGTGCAGACGCAATCAACGAAGCAAGTCTTTCTCTTACAGGAATCACTAAAAATAGAGCG AAGATCGGAAATCTGATTGGAGCGGAAGCAATTCTATACATAGGTTACCAAAAACCTTAT ACAGAGTGTAGTACTGAAAATAAAATCGATGCG…	CACGTGGGTAATCTTCCTCTGAGTCTGGGATAACTTTCCGAAAGGGAAGCTAATACTGGA TGGTCCCGAGAGATCACAAGATTTTTCGGGTAAAGATTTATTGCTCGGAGATGAGCCCGC GTCCGATTAGCTAGTTGGTGAGGTAAAGGCTCACCAAGGCGACGATCGGTAGCCGGCCTG AGAGGGTGTTCGGCCACTATGGAACTGAGACACGGTCCATACTCCTACGGGAGGCAGCAG TTACGAATCTTGCTCAATGGGGGGAACCCTGAAGCAGCGACGCCGCGTGAACGATGAAGG TCTTCGGATTGTAAAGTTCAGTAAGCAGGGAAAAATAAGCAGCAATGTGATGATGGTACC TGCCTAAAGCACCGGCTAACTACGTGCCAGCAG…	ATGCCGATCATTTTTGCTTCGTCTTTGATTTTATTTCCTCAGACGATTATTCAATGGTTA TCTAATAGTAGTCAAGAATGGGCTGGATGGGCAGTGATTATGGATTTTTTTAATCCATTC TCTCAGATTTGGTATCATGCGTTATTTTATTTCGTAATTTATACCGCTTTAATTGTATTC TTTGCTTACTTTTATACAGCGATTCAGTTTAATCCTGCAGAATTGGCTGAGAATTTGAAA AAATACGGTGGATTCATTCCAGGAATTCGTCCGGGTTCTCACACAAAAGAATATATTGAA AAAGTGTTAAATAGAATCACTCTTCCCGGAGCTATGTTTCTTGCAGGTTTGGCATTAGCA CCTTATATTATTATAAAATTCTTAGATTTGAGC…
135	Ref2	L.kirschneri	Russia	UnKnown	CTTTCTATCCCTCAGATTTCCACAGGCGATATTCTCCGCGAAGCGGTAAAGAATCAAACT GAGATGGGAATCGAAGCAAAACGTTATATGGATGCAGGTGATCTGGTACCTGATTCTGTT GTGATCGGAATCATCAAAGATCGTATCCGTGAAGCGGATTGCAGAAATGGGTTTTTATTG GATGGATTTCCAAGAACTGTAGAACAGGCGGAAGCTTTAGATACACTTTTAAAAAATGAA GGTAGGTCTATTGATAAAGCGATTAATCTTCAGGTTCCGGATGCGGAACTTTTAAAAAGA TTACTCAGCCGTGCAGAAATTGAAGGCCGTGCGGACGATAACGAAGTGACGATTAAAAAT CGTCTAGATAATTATAACAAGAAGACTTTACCT…	TATCTCGATATAGAACTGGACTATTATGATTTAGGTGTGGAATACAGAGACAAAACGGAT GATAAAGTTACTGTGGATTCTGCTCACGCGATTCAAAAATACGGAGTAGGCGTAAAATGT GCGACGATTACTCCTAACCAAGATAGAGTTAAAGAATACAATCTCAAACAAGAATGGAAA TCTCCGAACGGAACCATTCGTTCTATTTTAGACGGAACCGTTTTTCGTAAACCGATCATC GTAAAAAACATTCCTCCTGCGGTTCGTTCTTGGAAAAAACCGATTACGGTAGGACGTCAC GCCTACGGAGATCTTTATAAGGACACAGAACTTTATATTCCCGAAGCCGGAAAAGTGGAA CTCGTTTATACCGGCAAGGACGGAAAAGAAAAA…	ATCTCCGTTGCACTCTTTGCAAGCATTACCGCTTGTGGTGCTTTCGGTGGTCTGCCAAGC CTAAAAAGCTCTTTTGTTCTGAGCGAGGACACAATCCCAGGGACAAACGAAACCGTAAAA ACGTTACTTCCCTACGGATCTGTGATCAACTATTACGGATACGTAAAGCCAGGACAAGCG CCGGACGGTTTAGTCGATGGAAACAAAAAAGCATACTATCTCTATGTTTGGATTCCTGCC GTAATCGCTGAAATGGGAGTTCGTATGATTTCCCCAACAGGCGAAATCGGTGAACCAGGC GATGGAGACTTAGTAAGCGACGCTTTCAAAGCGGCTACCCCAGAAGAAAAATCAATGCCA CATTGGTTTGATACTTGGATCCGTGTAGAAAGA…	GGAAATTGCGCAGCTACAGTTGATGTAGAATATCCGGTATTCCCGAAAGATAAAGAAGGC CGTGCACTTCAAAAATTCCTCGGAACCATTCGTAACGTAGGTTTGGCTGTAGAAGCTCCT AAAAAAAGTCTTTGGGAAGCGATCTTCGGTGAAGGTTCCAGTTTTATTGATCAGATGCCT TCTAAAGTTTTCGAGGCGTTTGACAAAGAGTCTTATTACAAACTTACCGACTTGAGCAAA CGTGCAGACGCAATCAACGAAGCGAGTCTTTCTCTTACAGGAATTACTAAAAACAGAGCA AAGATCGGAAATCTGATCGGAGCAGAAGCAATTCTATACATAGGTTATCAAAAACCTTAT ACAGAGTGTAGTACTGAAAATAAAGTCGATGCG…	CACGTGGGTAATCTTCCTCTGAGTCTGGGATAACTTTCCGAAAGGGAAGCTAATACTGGA TGGTCCCGAGAGATCATAAGATTTTTCGGGTAAAGATTTATTGCTCGGAGATGAGCCCGC GTCCGATTAGCTAGTTGGTGAGGTAAAGGCTCACCAAGGCGACGATCGGTAGCCGGCCTG AGAGGGTGTTCGGCCACAATGGAACTGAGACACGGTCCATACTCCTACGGGAGGCAGCAG TTAAGAATCTTGCTCAATGGGGGGAACCCTGAAGCAGCGACGCCGCGTGAACGATGAAGG TCTTCGGATTGTAAAGTTCAGTAAGCAGGGAAAAATAAGCAGCAATGTGATGATGGTACC TGCCTAAAGCACCGGCTAACTACGTGCCAGCAG…	ATGCCGATCATTTTTGCTTCGTCTTTGATTTTATTTCCTCAGACGATCATTCAATGGTTA TCCAACAGTAGTCAAGAATGGGCTGGATGGGCAGTGATTATGGATTTTTTCCATCCATTC TCTCAGATTTGGTACCACGCGTTGTTTTATTTTGTGATCTATACCACTTTGATTATATTC TTTGCATATTTTTATACTGCGATTCAGTTTAACCCTGCGGAGTTGGCTGAGAATCTGAAA AAATACGGCGGGTTTATCCCAGGAATTCGCCCCGGTTCTCATACAAAAGAATACATCGAA AAAGTGTTAAATAGAATCACCCTTCCTGGAGCTATGTTTCTTGCCGGTTTGGCATTAGCA CCTTATATTATTATAAAATTCTTAGATTTGAGC…
136	Ref4	L.kirschneri	UnKnown	UnKnown	CTTTCTATCCCTCAGATTTCCACAGGCGATATTCTCCGCGAAGCGGTAAAGAATCAAACT GAGATGGGAATCGAAGCAAAACGTTATATGGATGCAGGTGATCTGGTACCTGATTCTGTT GTGATCGGAATCATCAAAGATCGTATCCGTGAAGCGGATTGCAGAAATGGGTTTTTATTG GATGGATTTCCAAGAACTGTAGAACAGGCGGAAGCTTTAGATACACTTTTAAAAAATGAA GGTAGGTCTATTGATAAAGCGATTAATCTTCAGGTTCCGGATGCGGAACTTTTAAAAAGA TTACTCAGCCGTGCAGAAATTGAAGGCCGTGCGGACGATAACGAAGTGACGATTAAAAAT CGTCTAGATAATTATAACAAGAAGACTTTACCT…	TATCTCGATATAGAACTGGACTATTATGATTTAGGTGTGGAATACAGAGACAAAACGGAT GATAAAGTTACTGTGGATTCTGCTCACGCGATTCAAAAATACGGAGTAGGCGTAAAATGT GCGACGATTACTCCTAACCAAGATAGAGTTAAAGAATACAATCTCAAACAAGAATGGAAA TCTCCGAACGGAACCATTCGTTCTATTTTAGACGGAACCGTTTTTCGTAAACCGATCATC GTAAAAAACATTCCTCCTGCGGTTCGTTCTTGGAAAAAACCAATTACGGTAGGACGTCAC GCCTACGGAGATCTTTATAAGGACACAGAACTTTATATTCCCGAAGCCGGAAAAGTGGAA CTCGTTTATACCGGCAAGGACGGAAAAGAAAAA…	ATCTCCGTTGCACTCTTTGCAAGCATTACCGCTTGTGGTGCTTTCGGTGGTCTGCCAAGC CTAAAAAGCTCTTTTGTTCTGAGCGAGGACACAATCCCAGGGACAAACGAAACCGTAAAA ACGTTACTTCCCTACGGATCTGTGATCAACTATTACGGATACGTAAAGCCAGGACAAGCG CCGGACGGTTTAGTCGATGGAAACAAAAAAGCATACTATCTCTATGTTTGGATTCCTGCC GTAATCGCTGAAATGGGAGTTCGTATGATTTCCCCAACAGGCGAAATCGGTGAACCAGGC GATGGAGACTTAGTAAGCGACGCTTTCAAAGCGGCTACCCCAGAAGAAAAATCAATGCCA CATTGGTTTGATACTTGGATCCGTGTAGAAAGA…	GGAAATTGCGCAGCTACAGTTGATGTAGAATATCCGGTATTCCCGAAAGATAAAGAAGGC CGTGCACTTCAAAAATTCCTCGGAACCATTCGTAACGTAGGTTTGGCTGTAGAAGCTCCT AAAAAAAGTCTTTGGGAAGCGATCTTCGGTGAAGGTTCCAGCTTTATTGATCAGATGCCT TCTAAAGTTTTCGAGGCGTTTGACAAAGAGTCTTATTACAAACTTACCGACCTGAGCAAA CGTGCAGACGCAATCAACGAAGCGAGTCTTTCTCTTACAGGAATTACTAAAAACAGAGCA AAGATCGGAAATCTGATCGGAGCAGAAGCAATTCTATACATAGGTTATCAAAAACCTTAT ACAGAGTGTAGTACTGAAAATAAAGTCGATGCG…	CACGTGGGTAATCTTCCTCCGAGTCTGGGATAACTTTCCGAAAGGGAAGCTAATACTGGA TGGTCCCGAGAGATCACAAGATTTTTCGGGTAAAGATTTATTGCTCGGAGATGAGCCCGC GTCCGATTAGCTAGTTGGTGAGGTAAAGGCTCACCAAGGCGACGATCGGTAGCCGGCCTG AGAGGGTGTTCGGCCACAATGGAACTGAGACACGGTCCATACTCCTACGGGAGGCAGCAG TTAAGAATCTTGCTCAATGGGGGGAACCCTGAAGCAGCGACGCCGCGTGAACGATGAAGG TCTTCGGATTGTAAAGTTCAGTAAGCAGGGAAAAATAAGCAGCAATGTGATGATGGTACC TGCCTAAAGCACCGGCTAACTACGTGCCAGCAG…	ATGCCGATCATTTTTGCTTCGTCTTTGATTTTATTTCCTCAGACGATCATTCAATGGTTA TCCAACAGTAGTCAAGAATGGGCTGGATGGGCAGTGATTATGGATTTTTTCCATCCATTC TCTCAGATTTGGTACCACGCGTTGTTTTATTTTGTGATCTATACCACTTTGATTATATTC TTTGCATATTTTTATACTGCGATTCAGTTTAACCCTGCGGAGTTGGCTGAGAATCTGAAA AAATACGGCGGATTTATCCCAGGAATTCGCCCCGGTTCTCATACAAAAGAATACATCGAA AAAGTGTTAAATAGAATCACCCTTCCTGGAGCTATGTTTCTTGCCGGTTTAGCATTAGCA CCTTATATCATTATAAAATTCTTAGATTTGAGC…
137	Ref14	L.kirschneri	Unknown	Unknown	CTTTCTTTTCCTCAGATTTCTACAGGCGATATTTTCCGCGAGGCGGTAAAGAATCAAACT GGGATGGGAATCGAAGCAAAACGTTATATGGATGCAGGAGATCTGGTCCCCGATTCTGTT GTGATCGGAATCATCAAAGATCGTATCCGTGAAGCGGATTGCAGAAATGGGTTTTTATTG GATGGATTTCCAAGAACCGTAGAACAGGCGGAAGCTTTAGATACACTTTTAAAAAATGAA GGTAGGTCTATTGATAAAGCGATTAATCTTCAGGTTCCGGATGCGGAACTTTTAAAAAGA TTACTCAGCCGGGCAGAAATTGAAGGCCGTGCGGACGATAACGAAGTGACGATTAAAAAT CGTCTAGATAATTATAACAAGAAGACTTTACCT…	TATCTCGATATAGAACTGGACTATTATGATTTAGGTGTGGAATACAGAGATAAAACGGAT GATAAAGTTACTGTGGATTCTGCTCACGCGATTCAAAAATACGGAGTAGGCGTAAAATGT GCGACGATTACTCCTAACCAAGATAGAGTTAAAGAATACAATCTCAAACAAGAATGGAAA TCTCCGAACGGAACCATTCGTTCTATTTTAGACGGAACCGTTTTTCGTAAACCGATCATC GTAAAAAACATTCCTCCTGCGGTTCGTTCTTGGAAAAAACCGATTACGGTAGGACGTCAC GCCTACGGAGATCTTTATAAGGACACAGAACTTTATATTCCCGAAGCCGGAAAAGTGGAA CTCGTTTATACCGGCAAGGACGGAAAAGAAAAA…	ATCTCCGTTGCACTCTTTGCAAGCATTACCGCTTGTGGTGCTTTCGGTGGTCTGCCAAGC CTAAAAAGCTCTTTTGTTCTGAGCGAGGACACAATCCCAGGGACAAACGAAACCGTAAAA ACGTTACTTCCCTACGGATCTGTGATCAACTATTACGGATACGTAAAGCCAGGACAAGCG CCGGACGGTTTAGTCGATGGAAACAAAAAAGCATACTATCTCTATGTTTGGATTCCTGCC GTAATCGCTGAAATGGGAGTTCGTATGATTTCCCCAACAGGCGAAATCGGTGAACCAGGC GATGGAGACTTAGTAAGCGACGCTTTCAAAGCGGCTACCCCAGAAGAAAAATCAATGCCA CATTGGTTTGATACTTGGATCCGTGTAGAAAGA…	GGAAATTGCGCAGCTACAGTCGATGTAGAATATCCGGTATTCCCGAAAGATAAAGAAGGC CGTGCACTTCAAAAATTCCTCGGAACCATTCGTAACGTAGGTTTGGCTGTAGAAGCTCCT AAAAAAAGTCTTTGGGAAGCGATCTTCGGTGAAGGTTCCAGTTTTATTGATCAGATGCCT TCTAAAGTTTTCGAGGCGTTTGACAAAGAGTCTTATTACAAACTTACCGACTTGAGCAAA CGTGCAGACGCAATCAACGAAGCGAGTCTTTCTCTTACAGGAATTACTAAAAACAGAGCA AAGATCGGAAATCTGATCGGAGCAGAAGCAATTCTATACATAGGTTATCAAAAACCTTAT ACAGAGTGTAGTACTGAAAATAAAGTCGATGCG…	CACGTGGGTAATCTTCCTCCGAGTCTGGGATAACTTTCCGAAAGGGAAGCTAATACTGGA TGGTCCCGAGAGATCATAAGATTTTTCGGGTAAAGATTTATTGCTCGGAGATGAGCCCGC GTCCGATTAGCTAGTTGGTGAGGTAAAGGCTCACCAAGGCGACGATCGGTAGCCGGCCTG AGAGGGTGTTCGGCCACAATGGAACTGAGACACGGTCCATACTCCTACGGGAGGCAGCAG TTAAGAATCTTGCTCAATGGGGGGAACCCTGAAGCAGCGACGCCGCGTGAACGATGAAGG TCTTCGGATTGTAAAGTTCAGTAAGCAGGGAAAAATAAGCAGCAATGTGATGATGGTACC TGCCTAAAGCACCGGCTAACTACGTGCCAGCAG…	ATGCCGATCATTTTTGCTTCCTCTTTGATTTTATTTCCTCAAACGATCATTCAATGGTTA TCCAATAGTAGTCAAGAATGGGCTGGATGGGCAGTGATTATGGATTTTTTCAATCCATTC TCTCAGATTTGGTACCACGCGTTGTTTTATTTTGTGATCTATACCACTTTGATTATATTC TTTGCATATTTTTATACTGCGATTCAGTTTAACCCTGCGGAGTTGGCTGAGAATCTGAAA AAATACGGCGGATTTATCCCAGGAATTCGCCCCGGTTCTCATACAAAAGAATACATCGAA AAAGTGTTAAATAGAATCACCCTTCCTGGAGCCACGCTTCTTGCCGGTTTGGCATTAGCA CCTTATATTATTATAAAATTCTTAGATTTGAGC…
138	UK1	L.kirschneri	Kuwait	UnKnown	CTTTCTATCCCTCAGATTTCCACAGGCGATATTCTCCGCGAAGCGGTAAAGAATCAAACT GAGATGGGAATCGAAGCAAAACGTTATATGGATGCAGGTGATCTGGTACCTGATTCTGTT GTGATCGGAATCATCAAAGATCGTATCCGTGAAGCGGATTGCAGAAATGGGTTTTTATTG GATGGATTTCCAAGAACTGTAGAACAGGCGGAAGCTTTAGATACACTTTTAAAAAATGAA GGTAGGTCTATTGATAAAGCGATTAATCTTCAGGTTCCGGATGCGGAACTTTTAAAAAGA TTACTCAGCCGTGCAGAAATTGAAGGCCGTGCGGACGATAACGAAGTGACGATTAAAAAT CGTCTAGATAATTATAACAAGAAGACTTTACCT…	TATCTCGATATAGAACTGGACTATTATGATTTAGGTGTGGAATACAGAGACAAAACGGAT GATAAAGTTACTGTGGATTCTGCTCACGCGATTCAAAAATACGGAGTAGGCGTAAAATGT GCGACGATTACTCCTAACCAAGATAGAGTTAAAGAATACAATCTCAAACAAGAATGGAAA TCTCCGAACGGAACCATTCGTTCTATTTTAGACGGAACCGTTTTTCGTAAACCGATCATC GTAAAAAACATTCCTCCTGCGGTTCGTTCTTGGAAAAAACCAATTACGGTAGGACGTCAC GCCTACGGAGATCTTTATAAGGACACAGAACTTTATATTCCCGAAGCCGGAAAAGTGGAA CTCGTTTATACCGGCAAGGACGGAAAAGAAAAA…	ATCTCCGTTGCACTCTTTGCAAGCATTACCGCTTGTGGTGCTTTCGGTGGTCTGCCAAGC CTAAAAAGCTCTTTTGTTCTGAGCGAGGACACAATCCCAGGGACAAACGAAACCGTAAAA ACGTTACTTCCCTACGGATCTGTGATCAACTATTACGGATACGTAAAGCCAGGACAAGCG CCGGACGGTTTAGTCGATGGAAACAAAAAAGCATACTATCTCTATGTTTGGATTCCTGCC GTAATCGCTGAAATGGGAGTTCGTATGATTTCCCCAACAGGCGAAATCGGTGAACCAGGC GATGGAGACTTAGTAAGCGACGCTTTCAAAGCGGCTACCCCAGAAGAAAAATCAATGCCA CATTGGTTTGATACTTGGATCCGTGTAGAAAGA…	GGAAATTGCGCAGCTACAGTTGATGTAGAATATCCGGTATTCCCGAAAGATAAAGAAGGC CGTGCACTTCAAAAATTCCTCGGAACCATTCGTAACGTAGGTTTGGCTGTAGAAGCTCCT AAAAAAAGTCTTTGGGAAGCGATCTTCGGTGAAGGTTCCAGCTTTATTGATCAGATGCCT TCTAAAGTTTTCGAGGCGTTTGACAAAGAGTCTTATTACAAACTTACCGACCTGAGCAAA CGTGCAGACGCAATCAACGAAGCGAGTCTTTCTCTTACAGGAATTACTAAAAACAGAGCA AAGATCGGAAATCTGATCGGAGCAGAAGCAATTCTATACATAGGTTATCAAAAACCTTAT ACAGAGTGTAGTACTGAAAATAAAGTCGATGCG…	CACGTGGGTAATCTTCCTCCGAGTCTGGGATAACTTTCCGAAAGGGAAGCTAATACTGGA TGGTCCCGAGAGATCATAAGATTTTTCGGGTAAAGATTTATTGCTCGGAGATGAGCCCGC GTCCGATTAGCTAGTTGGTGAGGTAAAGGCTCACCAAGGCGACGATCGGTAGCCGGCCTG AGAGGGTGTTCGGCCACAATGGAACTGAGACACGGTCCATACTCCTACGGGAGGCAGCAG TTAAGAATCTTGCTCAATGGGGGGAACCCTGAAGCAGCGACGCCGCGTGAACGATGAAGG TCTTCGGATTGTAAAGTTCAGTAAGCAGGGAAAAATAAGCAGCAATGTGATGATGGTACC TGCCTAAAGCACCGGCTAACTACGTGCCAGCAG…	ATGCCGATCATTTTTGCTTCGTCTTTGATTTTGTTTCCGCAGACGATCATTCAATGGTTA TCCAACAGTAGTCAAGAATGGGCTGGATGGGCAGTGATTATGGATTTTTTCAATCCATTC TCTCAGATTTGGTATCACGCGTTGTTTTATTTCGTGATCTATACCGCTTTGATTGTATTC TTTGCATACTTCTATACTGCGATTCAGTTTAACCCTGCGGAGTTGGCTGAGAATCTGAAA AAATACGGCGGGTTCATCCCAGGAATTCGCCCCGGTTCTCATACAAAAGAATACATCGAA AAAGTGTTAAATAGAATCACCCTTCCTGGAGCTATGTTTCTTGCCGGTTTGGCATTAGCA CCTTATATTATTATAAAATTCTTAGATTTGAGC…
139	UK2	L.kirschneri	Indonesia	UnKnown	CTTTCTATCCCTCAGATTTCCACAGGCGATATTCTCCGCGAAGCGGTAAAGAATCAAACT GAGATGGGAATCGAAGCAAAACGTTATATGGATGCAGGTGATCTGGTACCTGATTCTGTT GTGATCGGAATCATCAAAGATCGTATCCGTGAAGCGGATTGCAGAAATGGGTTTTTATTG GATGGATTTCCAAGAACTGTAGAACAGGCGGAAGCTTTAGATACACTTTTAAAAAATGAA GGTAGGTCTATTGATAAAGCGATTAATCTTCAGGTTCCGGATGCGGAACTTTTAAAAAGA TTACTCAGCCGTGCAGAAATTGAAGGCCGTGCGGACGATAACGAAGTGACGATTAAAAAT CGTCTAGATAATTATAACAAGAAGACTTTACCT…	TATCTCGATATAGAACTGGACTATTATGATTTAGGTGTGGAATACAGAGACAAAACGGAT GATAAAGTTACTGTGGATTCTGCTCACGCGATTCAAAAATACGGAGTAGGCGTAAAATGT GCGACGATTACTCCTAACCAAGATAGAGTTAAAGAATACAATCTCAAACAAGAATGGAAA TCTCCGAACGGAACCATTCGTTCTATTTTAGACGGAACCGTTTTTCGTAAACCGATCATC GTAAAAAACATTCCTCCTGCGGTTCGTTCTTGGAAAAAACCAATTACGGTAGGACGTCAC GCCTACGGAGATCTTTATAAGGACACAGAACTTTATATTCCCGAAGCCGGAAAAGTGGAA CTCGTTTATACCGGCAAGGACGGAAAAGAAAAA…	ATCTCCGTTGCACTCTTTGCAAGCATTACCGCTTGTGGTGCTTTCGGTGGTCTGCCAAGC CTAAAAAGCTCTTTTGTTCTGAGCGAGGACACAATCCCAGGGACAAACGAAACCGTAAAA ACGTTACTTCCCTACGGATCTGTGATCAACTATTACGGATACGTAAAGCCAGGACAAGCG CCGGACGGTTTAGTCGATGGAAACAAAAAAGCATACTATCTCTATGTTTGGATTCCTGCC GTAATCGCTGAAATGGGAGTTCGTATGATTTCCCCAACAGGCGAAATCGGTGAACCAGGC GATGGAGACTTAGTAAGCGACGCTTTCAAAGCGGCTACCCCAGAAGAAAAATCAATGCCA CATTGGTTTGATACTTGGATCCGTGTAGAAAGA…	GGAAATTGCGCAGCTACAGTTGATGTAGAATATCCGGTATTCCCGAAAGATAAAGAAGGC CGTGCACTTCAAAAATTCCTCGGAACCATTCGTAACGTAGGTTTGGCTGTAGAAGCTCCT AAAAAAAGTCTTTGGGAAGCGATCTTCGGTGAAGGTTCCAGCTTTATTGATCAGATGCCT TCTAAAGTTTTCGAGGCGTTTGACAAAGAGTCTTATTACAAACTTACCGACCTGAGCAAA CGTGCAGACGCAATCAACGAAGCGAGTCTTTCTCTTACAGGAATTACTAAAAACAGAGCA AAGATCGGAAATCTGATCGGAGCAGAAGCAATTCTATACATAGGTTATCAAAAACCTTAT ACAGAGTGTAGTACTGAAAATAAAGTCGATGCG…	CACGTGGGTAATCTTCCTCCGAGTCTGGGATAACTTTCCGAAAGGGAAGCTAATACTGGA TGGTCCCGAGAGATCATAAGATTTTTCGGGTAAAGATTTATTGCTCGGAGATGAGCCCGC GTCCGATTAGCTAGTTGGTGAGGTAAAGGCTCACCAAGGCGACGATCGGTAGCCGGCCTG AGAGGGTGTTCGGCCACAATGGAACTGAGACACGGTCCATACTCCTACGGGAGGCAGCAG TTAAGAATCTTGCTCAATGGGGGGAACCCTGAAGCAGCGACGCCGCGTGAACGATGAAGG TCTTCGGATTGTAAAGTTCAGTAAGCAGGGAAAAATAAGCAGCAATGTGATGATGGTACC TGCCTAAAGCACCGGCTAACTACGTGCCAGCAG…	ATGCCGATCATTTTTGCTTCCTCTTTGATTTTGTTTCCGCAAACGATCATTCAATGGTTA TCCAACAGTAGTCAAGAATGGGCTGGATGGGCAGTGATTATGGATTTTTTCAATCCATTC TCTCAGATTTGGTACCACGCGTTGTTTTATTTTGTGATCTATACCACTTTGATTATATTC TTTGCATATTTTTATACTGCGATTCAGTTTAACCCTGCGGAGTTGGCTGAGAATCTGAAA AAATACGGCGGGTTTATCCCAGGAATTCGCCCCGGTTCTCATACAAAAGAATACATCGAA AAAGTGTTAAATAGAATCACCCTTCCTGGAGCTATGTTTCTTGCCGGTTTAGCATTAGCA CCTTATATTATTATAAAATTCTTAGATTTGAGC…
140	UK8	L.kirschneri	Former USSR (Russia)	UnKnown	CTTTCTATCCCTCAGATTTCTACAGGCGATATTCTCCGCGAAGCGGTAAAGAATCAAACT GAGATGGGAATCGAAGCAAAACGTTATATGGATGCAGGTGATCTGGTACCTGATTCTGTT GTGATCGGAATCATCAAAGATCGTATCCGTGAAGCGGATTGCAGAAATGGGTTTTTATTG GATGGATTTCCAAGAACTGTAGAACAGGCGGAAGCTTTAGATACACTTTTAAAAAATGAA GGTAGGTCTATTGATAAAGCGATTAATCTTCAGGTTCCGGATGCGGAACTTTTAAAAAGA TTACTCAGCCGTGCAGAAATTGAAGGCCGTGCGGACGATAACGAAGTGACGATTAAAAAT CGTCTAGATAATTATAACAAGAAGACTTTACCT…	TATCTCGATATAGAACTGGACTATTATGATTTAGGTGTGGAATACAGAGATAAAACGGAT GATAAAGTTACTGTGGATTCTGCTCACGCGATTCAAAAATACGGAGTAGGCGTAAAATGT GCGACGATTACTCCTAACCAAGATAGAGTTAAAGAATACAATCTCAAACAAGAATGGAAA TCTCCGAACGGAACCATTCGTTCTATTTTAGACGGAACCGTTTTTCGTAAACCGATCATC GTAAAAAACATTCCTCCTGCGGTTCGTTCTTGGAAAAAACCGATTACGGTAGGACGTCAC GCCTACGGAGATCTTTATAAGGACACAGAACTTTATATTCCCGAAGCCGGAAAAGTGGAA CTCGTTTATACCGGCAAGGACGGAAAAGAAAAA…	ATCTCCGTTGCACTCTTTGCAAGCATTACCGCTTGTGGTGCTTTCGGTGGTCTGCCAAGC CTAAAAAGCTCTTTTGTTCTGAGCGAGGACACAATCCCAGGGACAAACGAAACCGTAAAA ACGTTACTTCCCTACGGATCTGTGATCAACTATTACGGATACGTAAAGCCAGGACAAGCG CCGGACGGTTTAGTCGATGGAAACAAAAAAGCATACTATCTCTATGTTTGGATTCCTGCC GTAATCGCTGAAATGGGAGTTCGTATGATTTCCCCAACAGGCGAAATCGGTGAACCAGGC GATGGAGACTTAGTAAGCGACGCTTTCAAAGCGGCTACCCCAGAAGAAAAATCAATGCCA CATTGGTTTGATACTTGGATCCGTGTAGAAAGA…	GGAAATTGCGCAGCTACAGTTGATGTAGAATATCCGGTATTCCCGAAAGATAAAGAAGGC CGTGCACTTCAAAAATTCCTCGGAACCATTCGTAACGTAGGTTTGGCTGTAGAAGCTCCT AAAAAAAGTCTTTGGGAAGCGATCTTCGGTGAAGGTTCCAGTTTTATTGATCAGATGCCT TCTAAAGTTTTCGAGGCGTTTGACAAAGAGTCTTATTACAAACTTACCGACTTGAGCAAA CGTGCAGACGCAATCAACGAAGCGAGTCTTTCTCTTACAGGAATTACTAAAAACAGAGCA AAGATCGGAAATCTGATCGGAGCAGAAGCAATTCTATACATAGGTTATCAAAAACCTTAT ACAGAGTGTAGTACTGAAAATAAAGTCGATGCG…	CACGTGGGTAATCTTCCTCCGAGTCTGGGATAACTTTCCGAAAGGGAAGCTAATACTGGA TGGTCCCGAGAGATCATAAGATTTTTCGGGTAAAGATTTATTGCTCGGAGATGAGCCCGC GTCCGATTAGCTAGTTGGTGAGGTAAAGGCTCACCAAGGCGACGATCGGTAGCCGGCCTG AGAGGGTGTTCGGCCACAATGGAACTGAGACACGGTCCATACTCCTACGGGAGGCAGCAG TTAAGAATCTTGCTCAATGGGGGGAACCCTGAAGCAGCGACGCCGCGTGAACGATGAAGG TCTTCGGATTGTAAAGTTCAGTAAGCAGGGAAAAATAAGCAGCAATGTGATGATGGTACC TGCCTAAAGCACCGGCTAACTACGTGCCAGCAG…	ATGCCGATCATTTTTGCTTCCTCTTTGATTTTGTTTCCGCAAACGATCATTCAATGGTTA TCCAATAGTAGTCAAGAATGGGCTGGATGGGCAGTGATTATGGATTTTTTCAATCCATTC TCTCAGATTTGGTACCACGCGTTGTTTTATTTTGTGATCTATACCACTTTGATTATATTC TTTGCATATTTTTATACTGCGATTCAGTTTAACCCTGCGGAGTTGGCTGAGAATCTGAAA AAATACGGCGGATTTATCCCAGGAATTCGCCCCGGTTCTCATACAAAAGAATACATCGAA AAAGTGTTAAATAGAATCACCCTTCCTGGAGCCATGTTTCTTGCCGGTTTGGCATTAGCA CCTTATATTATTATAAAATTCTTAGATTTGAGC…
141	UK11	L.kirschneri	Israel	UnKnown	CTTTCTATCCCTCAGATTTCCACAGGCGATATTCTCCGCGAAGCGGTAAAGAATCAAACT GAGATGGGAATCGAAGCAAAACGTTATATGGATGCAGGTGATCTGGTACCTGATTCTGTT GTGATCGGAATCATCAAAGATCGTATCCGTGAAGCGGATTGCAGAAATGGGTTTTTATTG GATGGATTTCCAAGAACTGTAGAACAGGCGGAAGCTTTAGATACACTTTTAAAAAATGAA GGTAGGTCTATTGATAAAGCGATTAATCTTCAGGTTCCGGATGCGGAACTTTTAAAAAGA TTACTCAGCCGTGCAGAAATTGAAGGCCGTGCGGACGATAACGAAGTGACGATTAAAAAT CGTCTAGATAATTATAACAAGAAGACTTTACCT…	TATCTCGATATAGAACTGGACTATTATGATTTAGGTGTGGAATACAGAGACAAAACGGAT GATAAAGTTACTGTGGATTCTGCTCACGCGATTCAAAAATACGGAGTAGGCGTAAAATGT GCGACGATTACTCCTAACCAAGATAGAGTTAAAGAATACAATCTCAAACAAGAATGGAAA TCTCCGAACGGAACCATTCGTTCTATTTTAGACGGAACCGTTTTTCGTAAACCGATCATC GTAAAAAACATTCCTCCTGCGGTTCGTTCTTGGAAAAAACCGATTACGGTAGGACGTCAC GCCTACGGAGATCTTTATAAGGACACAGAACTTTATATTCCCGAAGCCGGAAAAGTGGAA CTCGTTTATACCGGCAAGGACGGAAAAGAAAAA…	ATCTCCGTTGCACTCTTTGCAAGCATTACCGCTTGTGGTGCTTTCGGTGGTCTGCCAAGC CTAAAAAGCTCTTTTGTTCTGAGCGAGGACACAATCCCAGGGACAAACGAAACCGTAAAA ACGTTACTTCCCTACGGATCTGTGATCAACTATTACGGATACGTAAAGCCAGGACAAGCG CCGGACGGTTTAGTCGATGGAAACAAAAAAGCATACTATCTCTATGTTTGGATTCCTGCC GTAATCGCTGAAATGGGAGTTCGTATGATTTCCCCAACAGGCGAAATCGGTGAACCAGGC GATGGAGACTTAGTAAGCGACGCTTTCAAAGCGGCTACCCCAGAAGAAAAATCAATGCCA CATTGGTTTGATACTTGGATCCGTGTAGAAAGA…	GGAAATTGCGCAGCTACAGTTGATGTAGAATATCCGGTATTCCCGAAAGATAAAGAAGGC CGTGCACTTCAAAAATTCCTCGGAACCATTCGTAACGTAGGTTTGGCTGTAGAAGCTCCT AAAAAAAGTCTTTGGGAAGCGATCTTCGGTGAAGGTTCCAGTTTTATTGATCAGATGCCT TCTAAAGTTTTCGAGGCGTTTGACAAAGAGTCTTATTACAAACTTACCGACTTGAGCAAA CGTGCAGACGCAATCAACGAAGCGAGTCTTTCTCTTACAGGAATTACTAAAAACAGAGCA AAGATCGGAAATCTGATCGGAGCAGAAGCAATTCTATACATAGGTTATCAAAAACCTTAT ACAGAGTGTAGTACTGAAAATAAAGTCGATGCG…	CACGTGGGTAATCTTCCTCCGAGTCTGGGATAACTTTCCGAAAGGGAAGCTAATACTGGA TGGTCCCGAGAGATCATAAGATTTTTCGGGTAAAGATTTATTGCTCGGAGATGAGCCCGC GTCCGATTAGCTAGTTGGTGAGGTAAAGGCTCACCAAGGCGACGATCGGTAGCCGGCCTG AGAGGGTGTTCGGCCACAATGGAACTGAGACACGGTCCATACTCCTACGGGAGGCAGCAG TTAAGAATCTTGCTCAATGGGGGGAACCCTGAAGCAGCGACGCCGCGTGAACGATGAAGG TCTTCGGATTGTAAAGTTCAGTAAGCAGGGAAAAATAAGCAGCAATGTGATGATGGTACC TGCCTAAAGCACCGGCTAACTACGTGCCAGCAG…	ATGCCGATCATTTTTGCTTCCTCTTTGATTTTGTTTCCGCAAACGATCATTCAATGGTTA TCCAATAGTAGTCAAGAATGGGCTGGATGGGCAGTGATTATGGATTTTTTCAATCCATTC TCTCAGATTTGGTACCACGCGTTGTTTTATTTTGTGATCTATACCACTTTGATTATATTC TTTGCATATTTTTATACTGCGATTCAGTTTAACCCTGCGGAGTTGGCTGAGAATCTGAAA AAATACGGCGGGTTTATCCCAGGAATTCGCCCCGGTTCTCATACAAAAGAATACATCGAA AAAGTGTTAAATAGAATCACCCTTCCTGGAGCCATGTTTCTTGCCGGTTTGGCATTAGCA CCTTATATTATTATAAAATTCTTAGATTTGAGC…
142	UK27	L.kirschneri	Bulgaria	UnKnown	CTTTCTATCCCTCAGATTTCTACAGGCGATATTCTCCGCGAAGCGGTAAAGAATCAAACT GAGATGGGAATCGAAGCAAAACGTTATATGGATGCAGGTGATCTGGTACCTGATTCTGTT GTGATCGGAATCATCAAAGATCGTATCCGTGAAGCGGATTGCAGAAATGGGTTTTTATTG GATGGATTTCCAAGAACTGTAGAACAGGCGGAAGCTTTAGATACACTTTTAAAAAATGAA GGTAGGTCTATTGATAAAGCGATTAATCTTCAGGTTCCGGATGCGGAACTTTTAAAAAGA TTACTCAGCCGTGCAGAAATTGAAGGCCGTGCGGACGATAACGAAGTGACGATTAAAAAT CGTCTAGATAATTATAACAAGAAGACTTTACCT…	TATCTCGATATAGAACTGGACTATTATGATTTAGGTGTGGAATACAGAGATAAAACGGAT GATAAAGTTACTGTGGATTCTGCTCACGCGATTCAAAAATACGGAGTAGGCGTAAAATGT GCGACGATTACTCCTAACCAAGATAGAGTTAAAGAATACAATCTCAAACAAGAATGGAAA TCTCCGAACGGAACCATTCGTTCTATTTTAGACGGAACCGTTTTTCGTAAACCGATCATC GTAAAAAACATTCCTCCTGCGGTTCGTTCTTGGAAAAAACCGATTACGGTAGGACGTCAC GCCTACGGAGATCTTTATAAGGACACAGAACTTTATATTCCCGAAGCCGGAAAAGTGGAA CTCGTTTATACCGGAAAGGACGGAAAAGAAAAA…	ATCTCCGTTGCACTCTTTGCAAGCATTACCGCTTGTGGTGCTTTCGGTGGTCTGCCAAGC CTAAAAAGCTCTTTTGTTCTGAGCGAGGACACAATCCCAGGGACAAACGAAACCGTAAAA ACGTTACTTCCCTACGGATCTGTGATCAACTATTACGGATACGTAAAGCCAGGACAAGCG CCGGACGGTTTAGTCGATGGAAACAAAAAAGCATACTATCTCTATGTTTGGATTCCTGCC GTAATCGCTGAAATGGGAGTTCGTATGATTTCCCCAACAGGCGAAATCGGTGAACCAGGC GATGGAGACTTAGTAAGCGACGCTTTCAAAGCGGCTACCCCAGAAGAAAAATCAATGCCA CATTGGTTTGATACTTGGATCCGTGTAGAAAGA…	GGAAATTGCGCAGCTACAGTTGATGTAGAATATCCGGTATTCCCGAAAGATAAAGAAGGC CGTGCACTTCAAAAATTCCTCGGAACCATTCGTAACGTAGGTTTGGCTGTAGAAGCTCCT AAAAAAAGTCTTTGGGAAGCGATCTTCGGTGAAGGTTCCAGTTTTATTGATCAGATGCCT TCTAAAGTTTTCGAGGCGTTTGACAAAGAGTCTTATTACAAACTTACCGACTTGAGCAAA CGTGCAGACGCAATCAACGAAGCGAGTCTTTCTCTTACAGGAATTACTAAAAACAGAGCA AAGATCGGAAATCTGATCGGAGCAGAAGCAATTCTATACATAGGTTATCAAAAACCTTAT ACAGAGTGTAGTACTGAAAATAAAGTCGATGCG…	CACGTGGGTAATCTTCCTCCGAGTCTGGGATAACTTTCCGAAAGGGAAGCTAATACTGGA TGGTCCCGAGAGATCATAAGATTTTTCGGGTAAAGATTTATTGCTCGGAGATGAGCCCGC GTCCGATTAGCTAGTTGGTGAGGTAAAGGCTCACCAAGGCGACGATCGGTAGCCGGCCTG AGAGGGTGTTCGGCCACAATGGAACTGAGACACGGTCCATACTCCTACGGGAGGCAGCAG TTAAGAATCTTGCTCAATGGGGGGAACCCTGAAGCAGCGACGCCGCGTGAACGATGAAGG TCTTCGGATTGTAAAGTTCAGTAAGCAGGGAAAAATAAGCAGCAATGTGATGATGGTACC TGCCTAAAGCACCGGCTAACTACGTGCCAGCAG…	ATGCCGATCATTTTTGCTTCCTCTTGGATTTTGTTTCCGCAAACGATCATTCAATGGTTA TCCAATAGTAGTCAAGAATGGGCTGGATGGGCAGTGATTATGGATTTTTTCAATCCATTC TCTCAGATTTGGTACCACGCGTTGTTTTATTTTGTGATCTATACCACTTTGATTATATTC TTTGCATATTTTTATACTGCGATTCAGTTTAACCCTGCGGAGTTGGCTGAGAATCTGAAA AAATACGGCGGATTTATCCCAGGAATTCGCCCCGGTTCTCATACAAAAGAATACATCGAA AAAGTGTTAAATAGAATCACCCTTCCTGGAGCCATGTTTCTTGCCGGTTTGGCATTAGCA CCTTATATTATTATAAAATTCTTAGATTTGAGC…
143	QSL9	L.kirschneri	Bulgaria	Human	CTTTCTATTCCTCAGATTTCCACAGGCGATATTCTCCGCGAAGCGGTAAAGAATCAAACT GAGATGGGAATCGAAGCAAAACGTTATATGGATGCAGGCGATCTGGTGCCTGATTCTGTT GTGATCGGAATCATCAAAGACCGTATCCGTGAAGCGGATTGCAGAAATGGGTTTTTATTG GATGGATTTCCAAGAACTGTAGAACAGGCGGAAGCTTTAGATACACTTTTAAAAAATGAA GGTAGGTCTATTGATAAAGCGATTAATCTTCAGGTTCCGGATGCGGAACTTTTAAAAAGA TTACTCAGCCGTGCAGAAATTGAAGGCCGCGCGGACGATACCGAAGCGACGATTAAAAAT CGTCTAGATAATTATAACAGGAAGACTTTACCT…	TATCTCGATATAGAACTGGACTATTATGATTTAGGCGTGGAATACAGAGATAAAACGGAT GATAAAGTTACTGTGGATTCTGCTCACGCGATTCAAAAATACGGAGTAGGCGTAAAATGT GCGACGATTACTCCTAACCAAGATAGAGTTAAAGAATACAATCTCAAACAAGAATGGAAA TCTCCGAACGGAACCATTCGTTCTATTTTAGACGGAACCGTTTTTCGTAAACCGATCATC GTAAAAAACATTCCTCCTGCGGTTCGTTCTTGGAAAAAACCGATTACGGTAGGACGTCAC GCCTACGGAGATCTTTATAAGGACACAGAACTTTATATTCCCGAAGCCGGAAAAGTGGAA CTCGTTTATACCGGCAAGGACGGAAAAGAAAAA…	ATCTCCGTTGCACTCTTTGCAAGCATTACCGCTTGTGGTGCTTTCGGTGGTCTGCCAAGC CTAAAAAGCTCTTTTGTTCTGAGCGAGGACACAATCCCAGGGACAAACGAAACCGTAAAA ACGTTACTTCCCTACGGATCTGTGATCAACTATTACGGATACGTAAAGCCAGGACAAGCG CCGGACGGTTTAGTCGATGGAAACAAAAAAGCATACTATCTCTATGTTTGGATTCCTGCC GTAATCGCTGAAATGGGAGTTCGTATGATTTCCCCAACAGGCGAAATCGGTGAACCAGGC GATGGAGACTTAGTAAGCGACGCTTTCAAAGCGGCTACCCCAGAAGAAAAATCAATGCCA CATTGGTTTGATACTTGGATCCGTGTAGAAAGA…	GGAAATTGCGCAGCTACAGTTGATGTAGAATATCCGGTATTCCCGAAAGATAAAGAAGGC CGTGCACTTCAAAAATTCCTCGGAACCATTCGTAACGTAGGTTTGGCTGTAGAAGCTCCT AAAAAAAGTCTTTGGGAAGCGATCTTCGGTGAAGGTTCCAGCTTTATTGATCAGATGCCT TCTAAAGTTTTCGAGGCGTTTGACAAAGAGTCTTATTACAAACTTACCGACCTGAGCAAA CGTGCAGACGCAATCAACGAAGCGAGTCTTTCTCTTACAGGAATTACTAAAAACAGAGCA AAGATCGGAAATCTGATCGGAGCAGAAGCAATTCTATACATAGGTTATCAAAAACCTTAT ACAGAGTGTAGTACTGAAAATAAAATCGATGCG…	CACGTGGGTAATCTTCCTCCGAGTCTGGGATAACTTTCCGAAAGGGAAGCTAATACTGGA TAGTCCCGAGAGATCACAAGATTTTTCGGGTAAAGATTTATTGCTCGGAGATGAGCCCGC GTCCGATTAGCTAGTTGGTGAGGTAAAGGCTCACCAAGGCGACGATCGGTAGCCGGCCTG AGAGGGTGTTCGGCCACAATGGAACTGAGACACGGTCCATACTCCTACGGGAGGCAGCAG TTAAGAATCTTGCTCAATGGGGGGAACCCTGAAGCAGCGACGCCGCGTGAACGATGAAGG TCTTCGGATTGTAAAGTTCAGTAAGCAGGGAAAAATAAGCAGCAATGTGATGATGGTACC TGCCTAAAGCACCGGCTAACTACGTGCCAGCAG…	ATGCCGATCATTTTTGCCTCCTCTTTGATTTTATTTCCGCAAACGATCATTCAATGGTTA TCCAACAGTAGTCAAGAATGGGCTGGATGGGCAGTAATTATGGATTTTTTCAATCCATTC TCTCAGATTTGGTACCACGCGTTGTTTTATTTTGTGATCTATACCACTTTGATTATATTC TTTGCATATTTTTATACTGCGATTCAGTTTAACCCTGCGGAGTTGGCTGAAAATCTGAAA AAATACGGCGGGTTTATCCCAGGAATTCGCCCCGGTTCTCATACAAAAGAATACATCGAA AAAGTGTTAAATAGAATCACCCTTCCTGGAGCTATGTTTCTTGCCGGTTTAGCATTAGCA CCTTATATTATTATAAAATTCTTAGATTTGAGC…
144	QSL10	L.kirschneri	Zaire	Human	CTTTCTATTCCTCAGATTTCCACAGGCGATATTCTCCGCGAAGCGGTAAAGAATCAAACT GAGATGGGAATCGAAGCAAAACGTTATATGGATGCAGGTGATCTGGTACCTGATTCTGTT GTGATCGGAATCATCAAAGATCGTATCCGTGAAGCGGATTGCAGAAATGGGTTTTTATTG GATGGATTTCCAAGAACTGTAGAACAGGCGGAAGCTTTAGATACACTTTTAAAAAATGAA GGTAGGTCTATTGATAAAGCGATTAATCTTCAGGTTCCGGATGCGGAACTTTTAAAAAGA TTACTCAGCCGTGCAGAAATTGAAGGCCGTGCGGACGATAACGAAGTGACGATTAAAAAT CGTCTAGATAATTATAACAGGAAGACTTTACCT…	TATCTCGATATAGAACTGGACTATTATGATTTAGGTGTGGAATACAGAGACAAAACGGAT GATAAAGTTACTGTGGATTCTGCTCACGCGATTCAAAAATACGGAGTAGGCGTAAAATGT GCGACGATTACTCCTAACCAAGATAGAGTTAAAGAATACAATCTCAAACAAGAATGGAAA TCTCCGAACGGAACCATTCGTTCTATTTTAGACGGAACCGTTTTTCGTAAACCGATCATC GTAAAAAACATTCCTCCTGCGGTTCGTTCTTGGAAAAAACCGATTACGGTAGGACGTCAC GCCTACGGAGATCTTTATAAGGACACAGAACTTTATATTCCCGAAGCCGGAAAAGTGGAA CTCGTTTATACCGGCAAGGACGGAAAAGAAAAA…	ATCTCCGTTGCACTCTTTGCAAGCATTACCGCTTGTGGTGCTTTCGGTGGTCTGCCAAGC CTAAAAAGCTCTTTTGTTCTGAGCGAGGACACAATCCCAGGGACAAACGAAACCGTAAAA ACGTTACTTCCCTACGGATCTGTGATCAACTATTACGGATACGTAAAGCCAGGACAAGCG CCGGACGGTTTAGTCGATGGAAACAAAAAAGCATACTATCTCTATGTTTGGATTCCTGCC GTAATCGCTGAAATGGGAGTTCGTATGATTTCCCCAACAGGCGAAATCGGTGAACCAGGC GATGGAGACTTAGTAAGCGACGCTTTCAAAGCGGCTACCCCAGAAGAAAAATCAATGCCA CATTGGTTTGATACTTGGATCCGTGTAGAAAGA…	GGAAATTGCGCAGCTACAGTTGATGTAGAATATCCGGTATTCCCGAAAGATAAAGAAGGC CGTGCACTTCAAAAATTCCTCGGAACCATTCGTAACGTAGGTTTGGCTGTAGAAGCTCCT AAAAAAAGTCTTTGGGAAGCGATCTTCGGTGAAGGTTCCAGTTTTATTGATCAGATGCCT TCTAAAGTTTTCGAGGCGTTTGACAAAGAGTCTTATTACAAACTTACCGACTTGAGCAAA CGTGCAGACGCAATCAACGAAGCGAGTCTTTCTCTTACAGGAATTACTAAAAACAGAGCA AAGATCGGAAATCTGATCGGAGCAGAAGCAATTCTATACATAGGTTATCAAAAACCTTAT ACAGAGTGTAGTACTGAAAATAAAGTCGATGCG…	CACGTGGGTAATCTTCCTCCGAGTCTGGGATAACTTTCCGAAAGGGAAGCTAATACTGGA TAGTCCCGATAGATCATAGGATGTATCGGGTAAAGATTCATTGCTCGGAGATGAGCCCGC GTCCGATTAGCTAGTTGGTGAGGTAAAGGCTCACCAAGGCGACGATCGGTAGCCGGCCTG AGAGGGTGTTCGGCCACAATGGAACTGAGACACGGTCCATACTCCTACGGGAGGCAGCAG TTAAGAATCTTGCTCAATGGGGGGAACCCTGAAGCAGCGACGCCGCGTGAACGATGAAGG TCTTCGGATTGTAAAGTTCAATAAGCAGGGAAAAATAAGCAGCGATGTGATGATGGTACC TGCCTAAAGCACCGGCTAACTACGTGCCAGCAG…	ATGCCGATCATTTTTGCTTCGTCTTTGATTTTATTTCCGCAGACGATCATTCAATGGTTA TCCAATAGTAGTCAAGAATGGGCTGGATGGGCAGTGATTATGGATTTTTTCAATCCATTC TCTCAGATTTGGTATCACGCGTTATTTTATTTCGTGATCTATACCGCTTTAATTGTATTC TTTGCATACTTCTATACAGCGATTCAGTTTAATCCTGCAGAATTGGCTGAGAATCTGAAA AAATACGGCGGGTTCATCCCAGGAATTCGCCCGGGTTCTCACACAAAAGAATACATCGAA AAAGTGTTAAATAGAATCACTCTTCCCGGAGCTATGTTTCTTGCAGGTTTGGCATTAGCA CCTTATATTATTATAAAATTCTTAGATTTGAGC…
145	QSL12	L.kirschneri	Russia	Hedgehog	CTTTCTATCCCTCAGATTTCCACAGGCGATATTCTCCGCGAAGCGGTAAAGAATCAAACT GAGATGGGAATCGAAGCAAAACGTTATATGGATGCAGGTGATCTGGTACCTGATTCTGTT GTGATCGGAATCATCAAAGATCGTATCCGTGAAGCGGATTGCAGAAATGGGTTTTTATTG GATGGATTTCCAAGAACTGTAGAACAGGCGGAAGCTTTAGATACACTTTTAAAAAATGAA GGTAGGTCTATTGATAAAGCGATTAATCTTCAGGTTCCGGATGCGGAACTTTTAAAAAGA TTACTCAGCCGTGCAGAAATTGAAGGCCGTGCGGACGATAACGAAGTGACGATTAAAAAT CGTCTAGATAATTATAACAAGAAGACTTTACCT…	TATCTCGATATAGAACTGGACTATTATGATTTAGGTGTGGAATACAGAGACAAAACGGAT GATAAAGTTACTGTGGATTCTGCTCACGCGATTCAAAAATACGGAGTAGGCGTAAAATGT GCGACGATTACTCCTAACCAAGATAGAGTTAAAGAATACAATCTCAAACAAGAATGGAAA TCTCCGAACGGAACCATTCGTTCTATTTTAGACGGAACCGTTTTTCGTAAACCGATCATC GTAAAAAACATTCCTCCTGCGGTTCGTTCTTGGAAAAAACCGATTACGGTAGGACGTCAC GCCTACGGAGATCTTTATAAGGACACAGAACTTTATATTCCCGAAGCCGGAAAAGTGGAA CTCGTTTATACCGGCAAGGACGGAAAAGAAAAA…	ATCTCCGTTGCACTCTTTGCAAGCATTACCGCTTGTGGTGCTTTCGGTGGTCTGCCAAGC CTAAAAAGCTCTTTTGTTCTGAGCGAGGACACAATCCCAGGGACAAACGAAACCGTAAAA ACGTTACTTCCCTACGGATCTGTGATCAACTATTACGGATACGTAAAGCCAGGACAAGCG CCGGACGGTTTAGTCGATGGAAACAAAAAAGCATACTATCTCTATGTTTGGATTCCTGCC GTAATCGCTGAAATGGGAGTTCGTATGATTTCCCCAACAGGCGAAATCGGTGAACCAGGC GATGGAGACTTAGTAAGCGACGCTTTCAAAGCGGCTACCCCAGAAGAAAAATCAATGCCA CATTGGTTTGATACTTGGATCCGTGTAGAAAGA…	GGAAATTGCGCAGCTACAGTTGATGTAGAATATCCGGTATTCCCGAAAGATAAAGAAGGC CGTGCACTTCAAAAATTCCTCGGAACCATTCGTAACGTAGGTTTGGCTGTAGAAGCTCCT AAAAAAAGTCTTTGGGAAGCGATCTTCGGTGAAGGTTCCAGTTTTATTGATCAGATGCCT TCTAAAGTTTTCGAGGCGTTTGACAAAGAGTCTTATTACAAACTTACCGACCTGAGCAAA CGTGCAGACGCAATCAACGAAGCGAGTCTTTCTCTTACAGGAATTACTAAAAACAGAGCA AAGATCGGAAATCTGATCGGAGCAGAAGCAATTCTATACATAGGTTATCAAAAACCTTAT ACAGAGTGTAGTACTGAAAATAAAGTCGATGCG…	CACGTGGGTAATCTTCCTCCGAGTCTGGGATAACTTTCCGAAAGGGAAGCTAATACTGGA TGGTCCCGAGAGATCATAAGATTTTTCGGGTAAAGATTTATTGCTCGGAGATGAGCCCGC GTCCGATTAGCTAGTTGGTGAGGTAAAGGCTCACCAAGGCGACGATCGGTAGCCGGCCTG AGAGGGTGTTCGGCCACAATGGAACTGAGACACGGTCCATACTCCTACGGGAGGCAGCAG TTAAGAATCTTGCTCAATGGGGGGAACCCTGAAGCAGCGACGCCGCGTGAACGATGAAGG TCTTCGGATTGTAAAGTTCAGTAAGCAGGGAAAAATAAGCAGCAATGTGATGATGGTACC TGCCTAAAGCACCGGCTAACTACGTGCCAGCAG…	ATGCCGATCATTTTTGCTTCCTCCTTGATTTTGTTTCCGCAAACGATCATTCAATGGTTA TCCAATAGTAGTCAAGAATGGGCTGGATGGGCAGTGATTATGGATTTTTTCAATCCATTC TCTCAGATTTGGTACCACGCGTTGTTTTATTTTGTGATCTATACCACTTTGATTATATTC TTTGCATATTTTTATACTGCGATTCAGTTTAACCCTGCGGAGTTGGCTGAGAATCTGAAA AAATACGGCGGGTTTATCCCAGGAATTCGCCCCGGTTCTCATACAAAAGAATACATCGAA AAAGTGTTAAATAGAATCACCCTTCCTGGAGCCATGTTTCTTGCCGGTTTGGCATTAGCA CCTTATATTATTATAAAATTCTTAGATCTTAGC…
146	QSL14	L.kirschneri	Kenya	Unstriped grass rat	CTTTCTATCCCTCAGATTTCCACAGGCGATATTCTCCGCGAAGCGGTAAAGAATCAAACT GAGATGGGAATCGAAGCAAAACGTTATATGGATGCAGGTGATCTGGTACCTGATTCTGTT GTGATCGGAATCATCAAAGATCGTATCCGTGAAGCGGATTGCAGAAATGGGTTTTTATTG GATGGATTTCCAAGAACTGTAGAACAGGCGGAAGCTTTAGATACACTTTTAAAAAATGAA GGTAGGTCTATTGATAAAGCGATTAATCTTCAGGTTCCGGATGCGGAACTTTTAAAAAGA TTACTCAGCCGTGCAGAAATTGAAGGCCGTGCGGACGATACCGAAGTGACGATTAAAAAT CGTCTAGATAATTATAACAAGAAGACTTTACCT…	TATCTCGATATAGAACTGGACTATTATGATTTAGGTGTGGAATACAGAGACAAAACGGAT GATAAAGTTACTGTGGATTCTGCTCACGCGATTCAAAAATACGGAGTAGGCGTAAAATGT GCGACGATTACTCCTAACCAAGATAGAGTTAAAGAATACAATCTCAAACAAGAATGGAAA TCTCCGAACGGAACCATTCGTTCTATTTTAGACGGAACCGTTTTTCGTAAACCGATCATC GTAAAAAACATTCCTCCTGCGGTTCGTTCTTGGAAAAAACCGATTACGGTAGGACGTCAC GCCTACGGAGATCTTTATAAGGACACAGAACTTTATATTCCCGAAGCCGGAAAAGTGGAA CTCGTTTATACCGGCAAGGACGGAAAAGAAAAA…	ATCTCCGTTGCACTCTTTGCAAGCATTACCGCTTGTGGTGCTTTCGGTGGTCTGCCAAGC CTAAAAAGCTCTTTTGTTCTGAGCGAGGACACAATCCCAGGGACAAACGAAACCGTAAAA ACGTTACTTCCCTACGGATCTGTGATCAACTATTACGGATACGTAAAGCCAGGACAAGCG CCGGACGGTTTAGTCGATGGAAACAAAAAAGCATACTATCTCTATGTTTGGATTCCTGCC GTAATCGCTGAAATGGGAGTTCGTATGATTTCCCCAACAGGCGAAATCGGTGAACCAGGC GATGGAGACTTAGTAAGCGACGCTTTCAAAGCGGCTACCCCAGAAGAAAAATCAATGCCA CATTGGTTTGATACTTGGATCCGTGTAGAAAGA…	GGAAATTGCGCAGCTACAGTTGATGTAGAATATCCGGTATTCCCGAAAGATAAAGAAGGC CGTGCACTTCAAAAATTCCTCGGAACCATTCGTAACGTAGGTTTGGCTGTAGAAGCTCCT AAAAAAAGTCTTTGGGAAGCGATCTTCGGTGAAGGTTCCAGTTTTATTGATCAGATGCCT TCTAAAGTTTTCGAGGCGTTTGACAAAGAGTCTTATTACAAACTTACCGACCTGAGCAAA CGTGCAGACGCAATCAACGAAGCGAGTCTTTCTCTTACAGGAATTACTAAAAACAGAGCA AAGATCGGAAATCTGATCGGAGCAGAAGCAATTCTATACATAGGTTATCAAAAACCTTAT ACAGAGTGTAGTACTGAAAATAAAGTCGATGCG…	CACGTGGGTAATCTTCCTCCGAGTCTGGGATAACTTTCCGAAAGGGAAGCTAATACTGGA TGGTCCCGAGAGATCATAAGATTTTTCGGGTAAAGATTTATTGCTCGGAGATGAGCCCGC GTCCGATTAGCTAGTTGGTGAGGTAAAGGCTCACCAAGGCGACGATCGGTAGCCGGCCTG AGAGGGTGTTCGGCCACAATGGAACTGAGACACGGTCCATACTCCTACGGGAGGCAGCAG TTAAGAATCTTGCTCAATGGGGGGAACCCTGAAGCAGCGACGCCGCGTGAACGATGAAGG TCTTCGGATTGTAAAGTTCAGTAAGCAGGGAAAAATAAGCAGCAATGTGATGATGGTACC TGCCTAAAGCACCGGCTAACTACGTGCCAGCAG…	ATGCCGATCATTTTTGCTTCCTCTTTGATTTTGTTTCCGCAAACGATCATTCAATGGTTA TCCAATAGTAGTCAAGAATGGGCTGGATGGGCAGTGATTATGGATTTTTTCAATCCATTC TCTCAGATTTGGTACCACGCGTTGTTTTATTTTGTGATCTATACCACTTTGATTATATTC TTTGCATATTTTTATACTGCGATTCAGTTTAACCCTGCGGAGTTGGCTGAGAATCTGAAA AAATACGGCGGGTTTATCCCAGGAATTCGCCCCGGTTCTCATACAAAAGAATACATCGAA AAAGTGTTAAATAGAATCACCCTTCCTGGAGCCATGTTTCTTGCCGGTTTGGCATTAGCA CCTTATATTATTATAAAATTCTTAGATTTGAGC…
147	QSL16	L.kirschneri	Kzakhastan	Hedgehog	CTTTCTATTCCTCAGATTTCTACAGGAGATATTTTACGCGAGGCAGTAAAGAATCAAACT GCGATGGGAATAGAAGCAAAACGTTATATGGATGCGGGAGATTTGGTTCCAGATTCCGTA GTGATTGGAATCATAAAAGATCGCATTCGAGAAGCGGATTGTAAAAATGGATTTTTGTTG GATGGATTTCCGAGAACCGTGGAACAAGCGGAAGCTTTAGATACACTTTTAAAAAATGAA GGCAAGTCTATTGATAAAGCGATTAATCTTCAGGTTCCGGATGCGGAACTCTTAAAGAGA TTACTCGGCCGTGCAGAAATAGAAGGTCGCGCGGACGATAACGAAGTGACGATTAAAAAT CGTCTCGATAATTATAATAAGAAGACTTTACCT…	TATCTCGATATAGAACTGGATTATTATGATTTAGGCGTGGAGTACAGGGACAAAACGGAT GATAAAGTAACCGTGGATTCTGCTCACGCGATTCAAAAATATGGAGTAGGCGTAAAATGT GCGACGATTACTCCTAACCAAGATAGAGTTAAAGAATACAATCTCAAACAAGAATGGAAA TCTCCGAACGGAACCATTCGTTCTATTTTAGACGGAACCGTTTTTCGTAAACCGATCATC GTAAAAAATATTCCTCCTGCGGTTCGTTCTTGGAAAAAACCGATTACAGTAGGACGTCAC GCTTACGGAGATCTTTATAAGGACACAGAACTTTATATTCCCGAAGCCGGAAAGGTGGAA CTCGTTTATACCGGAAAGGACGGAAAAGAAAAA…	ATCTCCGTTGCACTCTTTGCAAGCATTACCGCTTGTGGTGCTTTCGGTGGTCTGCCAAGC CTAAAAAGCTCTTTTGTTCTGAGCGAGGACACAATCCCAGGGACAAACGAAACCGTAAAA ACGTTACTTCCCTACGGATCTGTGATCAACTATTACGGATACGTAAAGCCAGGACAAGCG CCGGACGGTTTAGTCGATGGAAACAAAAAAGCATACTATCTCTATGTTTGGATTCCTGCC GTAATCGCTGAAATGGGAGTTCGTATGATTTCCCCAACAGGCGAAATCGGTGAGCCAGGC GACGGAGACTTAGTAAGCGACGCTTTCAAAGCGGCTACCCCAGAAGAAAAATCAATGCCA CATTGGTTTGATACTTGGATCCGTGTAGAAAGA…	GGAAATTGCGCAGCTACAGTTGATGTAGAATATCCGGTATTCCCGAAAGATAAAGAAGGC CGTGCACTTCAGAAATTCCTCGGAACCATTCGTAACGTAGGTTTGGCTGTTGAAGCTCCT AAAAAAAGTCTTTGGGAAGCAATTTTCGGTGAAGGTTCCAGCTTTATCGATCAGATGCCT TCTAAAGTTTTCGAGGCGTTTGACAAAGAATCTTATTACAAACTTACCGACCTGAGTAAA CGTGCAGACGCAATCAACGAAGCAAGTCTTTCTCTTACAGGAATCACTAAAAATAGAGCG AAGATCGGAAATCTGATTGGAGCGGAAGCAATTCTATACATAGGTTACCAAAAACCTTAT ACAGAGTGTAGTACTGAAAATAAAATCGATGCA…	CACGTGGGTAATCTTCCTCTGAGTCTGGGATAACTTTCCGAAAGGGAAGCTAATACTGGA TGGTCCCGAGAGATCATAAGATTTTTCGGGTAAAGATTTATTGCTCGGAGATGAGCCCGC GTCCGATTAGCTAGTTGGTGAGGTAAAGGCTCACCAAGGCGACGATCGGTAGCCGGCCTG AGAGGGTGTTCGGCCACAATGGAACTGAGACACGGTCCATACTCCTACGGGAGGCAGCAG TTAAGAATCTTGCTCAATGGGGGGAACCCTGAAGCAGCGACGCCGCGTGAACGATGAAGG TCTTCGGATTGTAAAGTTCAGTAAGCAGGGAAAAATAAGCAGCAATGTGATGATGGTACC TGCCTAAAGCACCGGCTAACTACGTGCCAGCAG…	ATGCCGATCATTTTTGCTTCGTCTTTGATTTTATTTCCTCAGACGATTATTCAATGGTTA TCTAATAGTAGTCAAGAATGGGCTGGATGGGCAGTGATTATGGATTTTTTTAATCCATTC TCTCAGATTTGGTATCATGCGTTATTTTATTTCGTAATTTATACCGCTTTAATTGTATTC TTTGCTTACTTTTATACAGCGATTCAGTTTAATCCTGCAGAATTGGCTGAGAATTTGAAA AAATACGGTGGGTTCATTCCAGGAATTCGTCCGGGTTCTCACACAAAAGAATACATTGAA AAAGTGTTAAATAGAATCACTCTTCCCGGAGCTATGTTTCTTGCAGGTTTGGCATTAGCA CCTTATATTATTATAAAATTCTTAGATTTGAGC…
148	QSL25	L.kirschneri	Puerto Rico	Human	CTTTCTATCCCTCAGATTTCCACAGGCGATATTCTCCGCGAAGCGGTAAAGAATCAAACT GAGATGGGAATCGAAGCAAAACGTTATATGGATGCAGGTGATCTGGTACCTGATTCTGTT GTGATCGGAATCATCAAAGATCGTATCCGTGAAGCGGATTGCAGAAATGGGTTTTTATTG GATGGATTTCCAAGAACTGTAGAACAGGCGGAAGCTTTAGATACACTTTTAAAAAATGAA GGTAGGTCTATTGATAAAGCGATTAATCTTCAGGTTCCGGATGCGGAACTTTTAAAAAGA TTACTCAGCCGTGCAGAAATTGAAGGCCGTGCGGACGATACCGAAGTGACGATTAAAAAT CGTCTAGATATTTATAACAGGAAGACTTTACCT…	TATCTCGATATAGAACTGGACTATTATGATTTAGGTGTGGAATACAGAGACAAAACGGAT GATAAAGTTACTGTGGATTCTGCTCACGCGATTCAAAAATACGGAGTAGGCGTAAAATGT GCGACGATTACTCCTAACCAAGATAGAGTTAAAGAATACAATCTCAAACAAGAATGGAAA TCTCCGAACGGAACCATTCGTTCTATTTTAGACGGAACCGTTTTTCGTAAACCGATCATC GTAAAAAACATTCCTCCTGCGGTTCGTTCTTGGAAAAAACCGATTACGGTAGGACGTCAC GCCTACGGAGATCTTTATAAGGACACAGAACTTTATATTCCCGAAGCCGGAAAAGTGGAA CTCGTTTATACCGGCAAGGACGGAAAAGAAAAA…	ATCTCCGTTGCACTCTTTGCAAGCATTACCGCTTGTGGTGCTTTCGGTGGTCTGCCAAGC CTAAAAAGCTCTTTTGTTCTGAGCGAGGACACAATCCCAGGGACAAACGAAACCGTAAAA ACGTTACTTCCCTACGGATCTGTGATCAACTATTACGGATACGTAAAGCCAGGACAAGCG CCGGACGGTTTAGTCGATGGAAACAAAAAAGCATACTATCTCTATGTTTGGATTCCTGCC GTAATCGCTGAAATGGGAGTTCGTATGATTTCCCCAACAGGCGAAATCGGTGAACCAGGC GATGGAGACTTAGTAAGCGACGCTTTCAAAGCGGCTACCCCAGAAGAAAAATCAATGCCA CATTGGTTTGATACTTGGATCCGTGTAGAAAGA…	GGAAATTGCGCAGCTACAGTTGATGTAGAATATCCGGTATACCCGAAAGATAAAGAAGGC CGTGCACTTCAAAAATTCCTCGGAACCATTCGTAACGTAGGTTTGGCTGTAGAAGCTCCT AAAAAAAGTCTTTGGGAAGCGATCTTCGGTGAAGGTTCCAGTTTTATTGATCAGATGCCT TCTAAAGTTTTCGAGGCGTTTGACAAAGAGTCTTATTACAAACTTACCGACCTGAGCAAA CGTGCAGACGCAATCAACGAAGCGAGTCTTTCTCTTACAGGAATTACTAAAAACAGAGCA AAGATCGGAAATCTGATCGGAGCAGAAGCAATTCTATACATAGGTTATCAAAAACCTTAT ACAGAGTGTAGTACTGAAAATAAAGTCGATGCG…	CACGTGGTTAATCTTCCTCCGAGTCTGGGATAACTTTCCGAAAGGGAAGCTAATACTGGA TGGTCCCGAGAGATCATAAGATTTTTCGGGTAAAGATTTATTGCTCGGAGATGAGCCCGC GTCCGATTAGCTAGTTGGTGAGGTAAAGGCTCACCAAGGCGACGATCGGTAGCCGGCCTG AGAGGGTGTTCGGCCACAATGGAACTGAGACACGGTCCATACTCCTACGGGAGGCAGCAG TTAAGAATCTTGCTCAATGGGGGGAACCCTGAAGCAGCGACGCCGCGTGAACGATGAAGG TCTTCGGATTGTAAAGTTCAGTAAGCAGGGAAAAATAAGCAGCAATGTGATGATGGTACC TGCCTAAAGCACCGGCTAACTACGTGCCAGCAG…	ATGCCGATCATTTTTGCTTCGTCTTTGATTTTATTTCCGCAAACGATCATTCAATGGTTA TCCAATAGTAGTCAAGAATGGGCTGGATGGGCAGTGATTATGGATTTTTTCAATCCATTC TCTCAGATTTGGTACCACGCGTTGTTTTATTTTGTGATCTATACCACTTTGATTATATTC TTTGCATATTTTTATACTGCGATTCAGTTTAACCCTGCGGAGTTGGCTGAGAATCTGAAA AAATACGGCGGGTTTATCCCAGGAATTCGCCCCGGTTCTCATACAAAAGAATACATCGAA AAAGTGTTAAATAGAATCACCCTTCCTGGAGCCATGTTTCTTGCCGGTTTGGCATTAGCA CCTTATATTATTATAAAATTCTTAGATTTGAGC…
149	QSL31	L.kirschneri	Zaire	Human	CTTTCTATCCCTCAGATTTCCACAGGCGATATTCTCCGCGAAGCGGTAAAGAATCAAACT GAGATGGGAATCGAAGCAAAACGTTATATGGATGCAGGTGATCTGGTACCTGATTCTGTT GTGATCGGAATCATCAAAGATCGTATCCGTGAAGCGGATTGCAGAAATGGGTTTTTATTG GATGGATTTCCAAGAACTGTAGAACAGGCGGAAGCTTTAGATACACTTTTAAAAAATGAA GGTAGGTCTATTGATAAAGCGATTAATCTTCAGGTTCCGGATGCGGAACTTTTAAAAAGA TTACTCAGCCGTGCAGAAATTGAAGGCCGTGCGGACGATACCGAAGTGACGATTAAAAAT CGTCTAGATAATTATAACAGGAAGACTTTACCT…	TATCTCGATATAGAACTGGACTATTATGATTTAGGTGTGGAATACAGAGACAAAACGGAT GATAAAGTTACTGTGGATTCTGCTCACGCGATTCAAAAATACGGAGTAGGCGTAAAATGT GCGACGATTACTCCTAACCAAGATAGAGTTAAAGAATACAATCTCAAACAAGAATGGAAA TCTCCGAACGGAACCATTCGTTCTATTTTAGACGGAACCGTTTTTCGTAAACCGATCATC GTAAAAAACATTCCTCCTGCGGTTCGTTCTTGGAAAAAACCGATTACGGTAGGACGTCAC GCCTACGGAGATCTTTATAAGGACACAGAACTTTATATTCCCGAAGCCGGAAAAGTGGAA CTCGTTTATACCGGCAAGGACGGAAAAGAAAAA…	ATCTCCGTTGCACTCTTTGCAAGCATTACCGCTTGTGGTGCTTTCGGTGGTCTGCCAAGC CTAAAAAGCTCTTTTGTTCTGAGCGAGGACACAATCCCAGGGACAAACGAAACCGTAAAA ACGTTACTTCCCTACGGATCTGTGATCAACTATTACGGATACGTAAAGCCAGGACAAGCG CCGGACGGTTTAGTCGATGGAAACAAAAAAGCATACTATCTCTATGTTTGGATTCCTGCC GTAATCGCTGAAATGGGAGTTCGTATGATTTCCCCAACAGGCGAAATCGGTGAACCAGGC GATGGAGACTTAGTAAGCGACGCTTTCAAAGCGGCTACCCCAGAAGAAAAATCAATGCCA CATTGGTTTGATACTTGGATCCGTGTAGAAAGA…	GGAAATTGCGCAGCTACAGTTGATGTAGAATATCCGGTATTCCCGAAAGATAAAGAAGGC CGTGCACTTCAAAAATTCCTCGGAACCATTCGTAACGTAGGTTTGGCTGTAGAAGCTCCT AAAAAAAGTCTTTGGGAAGCGATCTTCGGTGAAGGTTCCAGTTTTATTGATCAGATGCCT TCTAAAGTTTTCGAGGCGTTTGACAAAGAGTCTTATTACAAACTTACCGACTTGAGCAAA CGTGCAGACGCAATCAACGAAGCGAGTCTTTCTCTTACAGGAATTACTAAAAACAGAGCA AAGATCGGAAATCTGATCGGAGCAGAAGCAATTCTATACATAGGTTATCAAAAACCTTAT ACAGAGTGTAGTACTGAAAATAAAGTCGATGCG…	CACGTGGGTAATCTTCCTCCGAGTCTGGGATAACTTTCCGAAAGGGAAGCTAATACTGGA TGGTCCCGAGAGATCATAAGATTTTTCGGGTAAAGATTTATTGCTCGGAGATGAGCCCGC GTCCGATTAGCTAGTTGGTGAGGTAAAGGCTCACCAAGGCGACGATCGGTAGCCGGCCTG AGAGGGTGTTCGGCCACAATGGAACTGAGACACGGTCCATACTCCTACGGGAGGCAGCAG TTAAGAATCTTGCTCAATGGGGGGAACCCTGAAGCAGCGACGCCGCGTGAACGATGAAGG TCTTCGGATTGTAAAGTTCAGTAAGCAGGGAAAAATAAGCAGCAATGTGATGATGGTACC TGCCTAAAGCACCGGCTAACTACGTGCCAGCAG…	ATGCCGATCATTTTTGCTTCGTCTTTGATTTTATTTCCGCAAACGATCATTCAATGGTTA TCCAATAGTAGTCAAGAATGGGCTGGATGGGCAGTGATTATGGATTTTTTCAATCCATTC TCTCAGATTTGGTACCACGCGTTGTTTTATTTTGTGATCTATACCACTTTGATTATATTC TTTGCATATTTTTATACTGCGATTCAGTTTAACCCTGCGGAGTTGGCTGAGAATCTGAAA AAATACGGCGGGTTTATCCCAGGAATTCGCCCCGGTTCTCATACAAAAGAATACATCGAA AAAGTGTTAAATAGAATCACCCTTCCTGGAGCCATGTTTCTTGCCGGTTTGGCATTAGCA CCTTATATTATTATAAAATTCTTAGATTTGAGC…
150	QSL44	L.kirschneri	Ghana	Human	CTTTCTATCCCTCAGATTTCCACGGGCGATATTCTCCGCGAGGCGGTAAAGAATCAAACT GCGATGGGAATCGAAGCAAAACGTTATATGGATGCAGGTGATCTGGTACCTGATTCCGTT GTGATCGGAATCATCAAAGATCGTATCCGAGAAGCGGATTGCAGAAATGGGTTTTTATTG GATGGATTTCCGAGAACTGTAGAACAGGCGGAAGCTTTAGATACACTTTTAAAAAATGAA GGTAGGTCTATTGATAAAGCGATTAATCTTCAGGTTCCGGATGCGGAACTTTTAAAACGA TTACTCAGCCGTGCAGAAATTGAAGGCCGTGCGGACGATAACGAAGTGACGATTAAAAAT CGTCTAGATAATTATAACAAGAAGACTTTACCC…	TATCTCGATATAGAACTGGACTATTATGATTTAGGTGTGGAATACAGAGATAAAACGGAT GATAAAGTTACTGTGGATTCTGCTCACGCGATTCAAAAATACGGAGTAGGCGTAAAATGT GCGACGATTACTCCTAACCAAGATAGAGTTAAAGAATACAATCTCAAACAAGAATGGAAA TCTCCGAACGGAACCATTCGTTCTATTTTAGACGGAACCGTTTTTCGTAAACCGATCATC GTAAAAAACATTCCTCCTGCGGTTCGTTCTTGGAAAAAACCGATTACGGTAGGACGTCAC GCCTACGGAGATCTTTATAAGGACACAGAACTTTATATTCCCGAAGCCGGAAAAGTGGAA CTCGTTTATACCGGCAAGGACGGAAAAGAAAAA…	ATCTCCGTTGCACTCTTTGCAAGCATTACCGCTTGTGGTGCTTTCGGTGGTCTGCCAAGC CTAAAAAGCTCTTTTGTTCTGAGCGAGGACACAATCCCAGGGACAAACGAAACCGTAAAA ACGTTACTTCCCTACGGATCTGTGATCAACTATTACGGATACGTAAAGCCAGGACAAGCG CCGGACGGTTTAGTCGATGGAAACAAAAAAGCATACTATCTCTATGTTTGGATTCCTGCC GTAATCGCTGAAATGGGAGTTCGTATGATTTCCCCAACAGGCGAAATCGGTGAACCAGGC GATGGAGACTTAGTAAGCGACGCTTTCAAAGCGGCTACCCCAGAAGAAAAATCAATGCCA CATTGGTTTGATACTTGGATCCGTGTAGAAAGA…	GGAAATTGCGCAGCTACAGTTGATGTAGAATATCCGGTATTCCCGAAAGATAAAGAAGGC CGTGCACTTCAGAAATTCCTCGGAACCATTCGTAACGTAGGTTTGGCTGTAGAAGCTCCT AAAAAAAGTCTTTGGGAAGCGATCTTCGGTGAAGGTTCCAGTTTTATTGATCAGATGCCT TCTAAAGTTTTCGAGGCGTTTGACAAAGAGTCTTATTACAAACTTACCGACCTGAGCAAA CGTGCAGACGCAATCAACGAAGCGAGTCTTTCTCTTACAGGAATTACTAAAAACAGAGCA AAGATCGGAAATCTGATCGGAGCAGAAGCAATTCTATACATAGGTTATCAAAAACCTTAT ACAGAGTGTAGTACTGAAAATAAAGTCGATGCG…	CACGTGGGTAATCTTCCTCCGAGTCTGGGATAACTTTCCGAAAGGGAAGCTAATACTGGA TGGTCCCGAGAGATCATAAGATTTTTCGGGTAAAGATTTATTGCTCGGAGATGAGCCCGC GTCCGATTAGCTAGTTGGTGAGGTAAAGGCTCACCAAGGCGACGATCGGTAGCCGGCCTG AGAGGGTGTTCGGCCACAATGGAACTGAGACACGGTCCATACTCCTACGGGAGGCAGCAG TTAAGAATCTTGCTCAATGGGGGGAACCCTGAAGCAGCGACGCCGCGTGAACGATGAAGG TCTTCGGATTGTAAAGTTCAGTAAGCAGGGAAAAATAAGCAGCAATGTGATGATGGTACC TGCCTAAAGCACCGGCTAACTACGTGCCAGCAG…	ATGCCGATCATTTTTGCTTCCTCTTTGATTTTATTTCCTCAAACGATCATTCAATGGTTA TCCAATAGTAGTCAAGAATGGGCTGGATGGGCAGTGATTATGGATTTTTTCAATCCATTC TCTCAGATTTGGTACCACGCGTTGTTTTATTTTGTGATCTATACCACTTTGATTATATTC TTTGCATATTTTTATACTGCGATTCAGTTTAACCCTGCGGAGTTGGCTGAGAATCTGAAA AAATACGGCGGGTTTATCCCAGGAATTCGCCCCGGTTCTCATACAAAAGAATACATCGAA AAAGTGTTAAATAGAATCACCCTTCCTGGAGCTATGTTTCTTGCTGGTTTAGCATTAGCA CCTTATATTATTATAAAATTCTTAGATTTGAGC…
151	QSL53	L.kirschneri	Jamaica	Rat	CTTTCTATCCCTCAGATTTCCACAGGCGATATTCTCCGCGAAGCGGTAAAGAATCAAACT GAGATGGGAATCGAAGCAAAACGTTATATGGATGCAGGTGATCTGGTACCTGATTCTGTT GTGATCGGAATCATCAAAGATCGTATCCGTGAAGCGGATTGCAGAAATGGGTTTTTATTG GATGGATTTCCAAGAACTGTAGAACAGGCGGAAGCTTTAGATACACTTTTAAAAAATGAA GGTAGGTCTATTGATAAAGCGATTAATCTTCAGGTTCCGGATGCGGAACTTTTAAAAAGA TTACTCAGCCGTGCAGAAATTGAAGGCCGTGCGGACGATAACGAAGTGACGATTAAAAAT CGTCTAGATAATTATAACAAGAAGACTTTACCT…	TATCTCGATATAGAACTGGACTATTATGATTTAGGTGTGGAATACAGAGACAAAACGGAT GATAAAGTTACTGTGGATTCTGCTCACGCGATTCAAAAATACGGAGTAGGCGTAAAATGT GCGACGATTACTCCTAACCAAGATAGAGTTAAAGAATACAATCTCAAACAAGAATGGAAA TCTCCGAACGGAACCATTCGTTCTATTTTAGACGGAACCGTTTTTCGTAAACCGATCATC GTAAAAAACATTCCTCCTGCGGTTCGTTCTTGGAAAAAACCAATTACGGTAGGACGTCAC GCCTACGGAGATCTTTATAAGGACACAGAACTTTATATTCCCGAAGCCGGAAAAGTGGAA CTCGTTTATACCGGCAAGGACGGAAAAGAAAAA…	ATCTCCGTTGCACTCTTTGCAAGCATTACCGCTTGTGGTGCTTTCGGTGGTCTGCCAAGC CTAAAAAGCTCTTTTGTTCTGAGCGAGGACACAATCCCAGGGACAAACGAAACCGTAAAA ACGTTACTTCCCTACGGATCTGTGATCAACTATTACGGATACGTAAAGCCAGGACAAGCG CCGGACGGTTTAGTCGATGGAAACAAAAAAGCATACTATCTCTATGTTTGGATTCCTGCC GTAATCGCTGAAATGGGAGTTCGTATGATTTCCCCAACAGGCGAAATCGGTGAACCAGGC GATGGAGACTTAGTAAGCGACGCTTTCAAAGCGGCTACCCCAGAAGAAAAATCAATGCCA CATTGGTTTGATACTTGGATCCGTGTAGAAAGA…	GGAAATTGCGCAGCTACAGTTGATGTAGAATATCCGGTATTCCCGAAAGATAAAGAAGGC CGTGCACTTCAAAAATTCCTCGGAACCATTCGTAACGTAGGTTTGGCTGTAGAAGCTCCT AAAAAAAGTCTTTGGGAAGCGATCTTCGGTGAAGGTTCCAGTTTTATTGATCAGATGCCT TCTAAAGTTTTCGAGGCGTTTGACAAAGAGTCTTATTACAAACTTACCGACCTGAGCAAA CGTGCAGACGCAATCAACGAAGCGAGTCTTTCTCTTACAGGAATTACTAAAAACAGAGCA AAGATCGGAAATCTGATCGGAGCAGAAGCAATTCTATACATAGGTTATCAAAAACCTTAT ACAGAGTGTAGTACTGAAAATAAAGTCGATGCG…	CACGTGGGTAATCTTCCTCCGAGTCTGGGATAACTTTCCGAAAGGGAAGCTAATACTGGA TGGTCCCGAGAGATCATAAGATTTTTCGGGTAAAGATTTATTGCTCGGAGATGAGCCCGC GTCCGATTAGCTAGTTGGTGAGGTAAAGGCTCACCAAGGCGACGATCGGTAGCCGGCCTG AGAGGGTGTTCGGCCACAATGGAACTGAGACACGGTCCATACTCCTACGGGAGGCAGCAG TTAAGAATCTTGCTCAATGGGGGGAACCCTGAAGCAGCGACGCCGCGTGAACGATGAAGG TCTTCGGATTGTAAAGTTCAGTAAGCAGGGAAAAATAAGCAGCAATGTGATGATGGTACC TGCCTAAAGCACCGGCTAACTACGTGCCAGCAG…	ATGCCGATCATTTTTGCTTCCTCTTTAATTTTGTTTCCTCAAACGATCATTCAATGGTTA TCCAATAGTAGTCAAGAATGGGCTGGATGGGCAGTGATTATGGATTTTTTCAATCCATTC TCTCAGATTTGGTACCACGCGTTGTTTTATTTTGTGATCTATACCACTTTGATTATATTC TTTGCATATTTTTATACTGCGATTCAGTTTAACCCTGCGGAGTTGGCTGAGAATCTGAAA AAATACGGCGGATTTATCCCAGGAATTCGCCCCGGTTCTCATACAAAAGAATACATCGAA AAAGTGTTAAATAGAATCACCCTTCCTGGAGCCATGTTTCTTGCCGGTTTGGCATTAGCA CCTTATATTATTATAAAATTCTTAGATTTGAGC…
152	QSL59	L.kirschneri	Zimbabwe	Cattle	CTTTCTATTCCTCAGATTTCCACAGGCGATATTCTCCGCGAAGCGGTAAAGAATCAAACT GAGATGGGAATCGAAGCAAAACGTTATATGGATGCAGGTGATCTGGTACCTGATTCTGTT GTGATCGGAATCATCAAAGATCGTATCCGTGAAGCGGATTGCAGAAATGGGTTTTTATTG GATGGATTTCCAAGAACTGTAGAACAGGCGGAAGCTTTAGATACACTTTTAAAAAATGAA GGTAGGTCTATTGATAAAGCGATTAATCTTCAGGTTCCGGATGCGGAACTTTTAAAAAGA TTACTCAGCCGTGCAGAAATTGAAGGCCGTGCGGCCGATACCGAAGTGACGATTAAAAAT CGTCTAGATAATTATAACAAGAAGACTTTACCT…	TATCTCGATATAGAACTGGACTATTATGATTTAGGTGTGGAATACAGAGACAAAACGGAT GATAAAGTTACTGTGGATTCTGCTCACGCGATTCAAAAATACGGAGTAGGCGTAAAATGT GCGACGATTACTCCTAACCAAGATAGAGTTAAAGAATACAATCTCAAACAAGAATGGAAA TCTCCGAACGGAACCATTCGTTCTATTTTAGACGGAACCGTTTTTCGTAAACCGATCATC GTAAAAAACATTCCTCCTGCGGTTCGTTCTTGGAAAAAACCGATTACGGTAGGACGTCAC GCCTACGGAGATCTTTATAAGGACACAGAACTTTATATTCCCGAAGCCGGAAAAGTGGAA CTCGTTTATACCGGCAAGGACGGAAAAGAAAAA…	ATCTCCGTTGCACTCTTTGCAAGCATTACCGCTTGTGGTGCTTTCGGTGGTCTGCCAAGC CTAAAAAGCTCTTTTGTTCTGAGCGAGGACACAATCCCAGGGACAAACGAAACCGTAAAA ACGTTACTTCCCTACGGATCTGTGATCAACTATTACGGATACGTAAAGCCAGGACAAGCG CCGGACGGTTTAGTCGATGGAAACAAAAAAGCATACTATCTCTATGTTTGGATTCCTGCC GTAATCGCTGAAATGGGAGTTCGTATGATTTCCCCAACAGGCGAAATCGGTGAACCAGGC GATGGAGACTTAGTAAGCGACGCTTTCAAAGCGGCTACCCCAGAAGAAAAATCAATGCCA CATTGGTTTGATACTTGGATCCGTGTAGAAAGA…	GGAAATTGCGCAGCTACAGTTGATGTAGAATATCCGGTATTCCCGAAAGATAAAGAAGGC CGTGCACTTCAAAAATTCCTCGGAACCATTCGTAACGTAGGTTTGGCTGTAGAAGCTCCT AAAAAAAGTCTTTGGGAAGCGATCTTCGGTGAAGGTTCCAGCTTTATTGATCAGATGCCT TCTAAAGTTTTCGAGGCGTTTGACAAAGAGTCTTATTACAAACTTACCGACCTGAGCAAA CGTGCAGACGCAATCAACGAAGCGAGTCTTTCTCTTACAGGAATTACTAAAAACAGAGCA AAGATCGGAAATCTGATCGGAGCAGAAGCAATTCTATACATAGGTTATCAAAAACCTTAT ACAGAGTGTAGTACTGAAAATAAAGTCGATGCG…	CACGTGGGTAATCTTCCTCTGAGTCTGGGATAACTTTCCGAAAGGGAAGCTAATACTGGA TGGTCCCGAGAGATCATAAGATTTTTCGGGTAAAGATTTATTGCTCGGAGATGAGCCCGC GTCCGATTAGCTAGTTGGTGAGGTAAAGGCTCACCAAGGCGACGATCGGTAGCCGGCCTG AGAGGGTGTTCGGCCACTATGGAACTGAGACACGGTCCATACTCCTACGGGAGGCAGCAG TTAAGAATCTTGCTCAATGGGGGGAACCCTGAAGCAGCGACGCCGCGTGAACGATGAAGG TCTTCGGATTGTAAAGTTCAGTAAGCAGGGAAAAATAAGCAGCAATGTGATGATGGTACC TGCCTAAAGCACCGGCTAACTACGTGCCAGCAG…	ATGCCGATCATTTTTGCTTCCTCTTTAATTTTGTTTCCTCAAACGATCATTCAATGGTTA TCCAATAGTAGTCAAGAATGGGCTGGATGGGCAGTGATTATGGATTTTTTCAATCCATTC TCTCAGATTTGGTACCACGCGTTGTTTTATTTTGTGATCTATACCACTTTGATTATATTC TTTGCATATTTTTATACTGCGATTCAGTTTAACCCTGCGGAGTTGGCTGAGAATCTGAAA AAATACGGCGGATTTATCCCAGGAATTCGCCCCGGTTCTCATACAAAAGAATACATCGAA AAAGTGTTAAATAGAATCACCCTTCCTGGAGCCATGTTTCTTGCCGGTTTGGCATTAGCA CCTTATATTATTATAAAATTCTTAGATTTGAGC…
153	QSL85	L.kirschneri	China	Apodemus chevieri	CTTTCTATCCCTCAGATTTCCACAGGCGATATTCTCCGCGAAGCGGTAAAGAATCAAACT GAGATGGGAATCGAAGCAAAACGTTATATGGATGCAGGTGATCTGGTACCTGATTCTGTT GTGATCGGAATCATCAAAGATCGTATCCGTGAAGCGGATTGCAGAAATGGGTTTTTATTG GATGGATTTCCAAGAACTGTAGAACAGGCGGAAGCTTTAGATACACTTTTAAAAAATGAA GGTAGGTCTATTGATAAAGCGATTAATCTTCAGGTTCCGGATGCGGAACTTTTAAAAAGA TTACTCAGCCGGGCAGAAATTGAAGGCCGTGCGGACGATAACGAAGTGACGATTAAAAAT CGTCTAGATAATTATAACAAGAAGACTTTACCT…	TATCTCGATATAGAACTGGACTATTATGATTTAGGTGTGGAATACAGAGATAAAACGGAT GATAAAGTTACTGTGGATTCTGCTCACGCGATTCAAAAATACGGAGTAGGCGTAAAATGT GCGACGATTACTCCTAACCAAGATAGAGTTAAAGAATACAATCTCAAACAAGAATGGAAA TCTCCGAACGGAACCATTCGTTCTATTTTAGACGGAACCGTTTTTCGTAAACCGATCATC GTAAAAAACATTCCTCCTGCGGTTCGTTCTTGGAAAAAACCGATTACGGTAGGACGTCAC GCCTACGGAGATCTTTATAAGGACACAGAACTTTATATTCCCGAAGCCGGAAAAGTGGAA CTCGTTTATACCGGCAAGGACGGAAAAGAAAAA…	ATCTCCGTTGCACTCTTTGCAAGCATTACCGCTTGTGGTGCGTTCGGTGGTCTGCCAAGC CTAAAAAGCTCTTTTGTTCTGAGCGAGGACACAATCCCAGGGACAAACGAAACCGTAAAA ACGTTACTTCCCTACGGATCTGTGATCAACTATTACGGATACGTAAAGCCAGGACAAGCG CCGGACGGTTTAGTCGATGGAAACAAAAAAGCATACTATCTCTATGTTTGGATTCCTGCC GTAATCGCTGAAATGGGAGTTCGTATGATTTCCCCAACAGGCGAAATCGGTGAACCAGGC GATGGAGACTTAGTAAGCGACGCTTTCAAAGCGGCTACCCCAGAAGAAAAATCAATGCCA CATTGGTTTGATACTTGGATCCGTGTAGAAAGA…	GGAAATTGCGCAGCTACAGTTGATGTAGAATATCCGGTATTCCCGAAAGATAAAGAAGGC CGTGCACTTCAGAAATTCCTCGGAACCATTCGTAACGTAGGTTTGGCTGTAGAAGCTCCT AAAAAAAGTCTTTGGGAAGCGATCTTCGGTGAAGGTTCCAGTTTTATTGATCAGATGCCT TCTAAAGTTTTCGAGGCGTTTGACAAAGAGTCTTATTACAAACTTACCGACTTGAGCAAA CGTGCAGACGCAATCAACGAAGCGAGTCTTTCTCTTACAGGAATTACTAAAAACAGAGCA AAGATCGGAAATCTGATCGGAGCAGAAGCAATTCTATACATAGGTTATCAAAAACCTTAT ACAGAGTGTAGTACTGAAAATAAAGTCGATGCG…	CACGTGGGTAATCTTCCTCCGAGTCTGGGATAACTTTCCGAAAGGGAAGCTAATACTGGA TGGTCCCGAGAGATCATAAGATTTTTCGGGTAAAGATTTATTGCTCGGAGATGAGCCCGC GTCCGATTAGCTAGTTGGTGAGGTAAAGGCTCACCAAGGCGACGATCGGTAGCCGGCCTG AGAGGGTGTTCGGCCACAATGGAACTGAGACACGGTCCATACTCCTACGGGAGGCAGCAG TTAAGAATCTTGCTCAATGGGGGGAACCCTGAAGCAGCGACGCCGCGTGAACGATGAAGG TCTTCGGATTGTAAAGTTCAGTAAGCAGGGAAAAATAAGCAGCAATGTGATGATGGTACC TGCCTAAAGCACCGGCTAACTACGTGCCAGCAG…	ATGCCGATCATTTTTGCTTCCTCTTTGATTTTGTTTCCGCAGACGATCATTCAATGGTTA TCCAATAGTAGTCAAGAATGGGCTGGATGGGCAGTGATTATGGATTTTTTCAATCCATTC TCTCAGATTTGGTACCACGCGTTGTTTTATTTTGTGATCTATACCACTTTGATTATATTC TTTGCATATTTTTATACTGCGATTCAGTTTAACCCTGCGGAGTTGGCTGAGAATCTGAAA AAATACGGCGGATTTATCCCAGGAATTCGCCCCGGTTCTCATACAAAAGAATACATCGAA AAAGTGTTAAATAGAATCACCCTTCCTGGAGCCATGTTTCTTGCCGGTTTGGCATTAGCA CCTTATATTATTATAAAATTCTTAGATTTGAGC…
154	Ind14	L.kirschneri	UnKnown	UnKnown	CTTTCTATTCCTCAGATTTCTACAGGAGATATTTTACGCGAGGCAGTAAAGAATCAAACT GCGATGGGAATAGAAGCAAAACGTTATATGGATGCGGGAGACTTGGTTCCAGATTCCGTA GTGATTGGAATCATAAAAGATCGCATTCGAGAAGCGGATTGTAAAAATGGATTTTTGTTG GATGGATTTCCGAGAACCGTGGAACAAGCGGAAGCTTTAGATACACTTTTAAAAAATGAA GGCAAGTCTATTGATAAAGCGATTAATCTTCAGGTTCCGGATGCGGAACTCTTAAAGAGA TTACTCGGCCGTGCAGAAATAGAAGGTCGCGCGGCCGATAACGAAGTGACGATTAAAAAT CGTCTCGATAATTATAATAAGAAGACCTTACCT…	TATCTCGATATAGAACTGGATTATTATGATTTAGGCGTGGAGTACAGGGACAAAACGGAT GATAAAGTAGCCGTGGATTCTGCTCACGCGATTCAAAAATATGGAGTAGGCGTAAAATGT GCGACGATTACTCCTAACCAAGATAGAGTTAAAGAATACAATCTCAAACAAGAATGGAAA TCTCCGAACGGAACCATTCGTTCTATTTTAGACGGAACCGTTTTTCGTAAACCGATCATC GTAAAAAATATTCCTCCTGCGGTTCGTTCTTGGAAAAAACCGATTACAGTAGGACGTCAC GCTTACGGAGATCTTTATAAGGACACAGAACTTTATATTCCCGAAGCCGGAAAGGTGGAA CTCGTTTATACCGGAAAGGACGGAAAAGAAAAA…	ATCTCCGTTGCACTCTTTGCAAGCATTACCGCTTGTGGTGCTTTCGGTGGTCTGCCAAGC CTAAAAAGCTCTTTTGTTCTGAGCGAGGACACAATCCCAGGGACAAACGAAACCGTAAAA ACGTTACTTCCCTACGGATCTGTGATCAACTATTACGGATACGTAAAGCCAGGACAAGCG CCGGACGGTTTAGTCGATGGAAACAAAAAAGCATACTATCTCTATGTTTGGATTCCTGCC GTAATCGCTGAAATGGGAGTTCGTATGATTTCCCCAACAGGCGAAATCGGTGAACCAGGC GACGGAGACTTAGTAAGCGACGCTTTCAAAGCGGCTACCCCAGAAGAAAAATCAATGCCA CATTGGTTTGATACTTGGATCCGTGTAGAAAGA…	GGAAATTGCGCAGCTACAGTCGATGTAGAATATCCGGTATTCCCGAAAGATAAAGAAGGC CGTGCACTTCAGAAATTCCTCGGAACCATTCGTAACGTAGGTTTGGCCGTTGAAGCTCCT AAAAAAAGTCTTTGGGAAGCAATTTTCGGTGAAGGTTCCAGCTTTATCGATCAGATGCCT TCTAAAGTTTTCGAGGCGTTTGACAAAGAATCTTATTACAAACTTACCGACCTAAGCAAA CGTGCAGACGCAATCAACGAAGCAAGTCTTTCTCTTACAGGAATCACTAAAAATAGAGCG AAGATCGGAAATCTGATTGGAGCGGAAGCAATTCTATACATAGGTTACCAAAAACCTTAT ACAGAGTGTAGTACTGAAAATAAAATCGATGCG…	CACGTGGGTAATCTTCCTCTGAGTCTGGGATAACTTTCCGAAAGGGAAGCTAATACTGGA TGGTCCCGAGAGATCATAAGATTTTTCGGGTAAAGATTTATTGCTCGGAGATGAGCCCGC GTCCGATTAGCTAGTTGGTGAGGTAAAGGCTCACCAAGGCGACGATCGGTAGCCGGCCTG AGAGGGTGTTCGGCCACAATGGAACTGAGACACGGTCCATACTCCTACGGGAGGCAGCAG TTAAGAATCTTGCTCAATGGGGGGAACCCTGAAGCAGCGACGCCGCGTGAACGATGAAGG TCTTCGGATTGTAAAGTTCAGTAAGCAGGGAAAAATAAGCAGCAATGTGATGATGGTACC TGCCTAAAGCACCGGCTAACTACGTGCCAGCAG…	ATGCCGATCATTTTTGCTTCGTCTTTGATTTTATTTCCTCAGACGATTATTCAATGGTTA TCTAATAGTAGTCAAGAATGGGCTGGATGGGCAGTGATTATGGATTTTTTTAATCCATTC TCTCAGATTTGGTATCATGCGTTATTTTATTTCGTAATTTATACCGCTTTAATTGTATTC TTTGCTTACTTTTATACAGCGATTCAGTTTAATCCTGCAGAATTGGCTGAGAATTTGAAA AAATACGGTGGATTCATTCCAGGAATTCGTCCGGGTTCTCACACAAAAGAATATATTGAA AAAGTGTTAAATAGAATCACTCTTCCCGGAGCTATGTTTCTTGCAGGTTTGGCATTAGCA CCTTATATTATTATAAAATTCTTAGATTTGAGC…
155	R34	L.kirschneri	Tanzania	Cricetomys	CTTTCTATCCCTCAGATTTCCACAGGCGATATTCTCCGCGAAGCGGTAAAGAATCAAACT GAGATGGGAATCGAAGCAAAACGTTATATGGATGCAGGTGATCTGGTACCTGATTCTGTT GTGATCGGAATCATCAAAGATCGTATCCGTGAAGCGGATTGCAGAAATGGGTTTTTATTG GATGGATTTCCAAGAACTGTAGAACAGGCGGAAGCTTTAGATACACTTTTAAAAAATGAA GGTAGGTCTATTGATAAAGCGATTAATCTTCAGGTTCCGGATGCGGAACTTTTAAAAAGA TTACTCAGCCGGGCAGAAATTGAAGGCCGTGCGGACGATAACGAAGTGACGATTAAAAAT CGTCTAGATAATTATAACAAGAAGACTTTACCT…	TATCTCGATATAGAACTGGACTATTATGATTTAGGTGTGGAATACAGAGACAAAACGGAT GATAAAGTTACTGTGGATTCTGCTCACGCGATTCAAAAATACGGAGTAGGCGTAAAATGT GCGACGATTACTCCTAACCAAGATAGAGTTAAAGAATACAATCTCAAACAAGAATGGAAA TCTCCGAACGGAACCATTCGTTCTATTTTAGACGGAACCGTTTTTCGTAAACCGATCATC GTAAAAAACATTCCTCCTGCGGTTCGTTCTTGGAAAAAACCGATTACGGTAGGACGTCAC GCCTACGGAGATCTTTATAAGGACACAGAACTTTATATTCCCGAAGCCGGAAAAGTGGAA CTCGTTTATACCGGCAAGGACGGAAAAGAAAAA…	ATCTCCGTTGCACTCTTTGCAAGCATTACCGCTTGTGGTGCTTTCGGTGGTCTGCCAAGC CTAAAAAGCTCTTTTGTTCTGAGCGAGGACACAATCCCAGGGACAAACGAAACCGTAAAA ACGTTACTTCCCTACGGATCTGTGATCAACTATTACGGATACGTAAAGCCAGGACAAGCG CCGGACGGTTTAGTCGATGGAAACAAAAAAGCATACTATCTCTATGTTTGGATTCCTGCC GTAATCGCTGAAATGGGAGTTCGTATGATTTCCCCAACAGGCGAAATCGGTGAACCAGGC GATGGAGACTTAGTAAGCGACGCTTTCAAAGCGGCTACCCCAGAAGAAAAATCAATGCCA CATTGGTTTGATACTTGGATCCGTGTAGAAAGA…	GGAAATTGCGCAGCTACAGTTGATGTAGAATATCCGGTATTCCCGAAAGATAAAGAAGGC CGTGCACTTCAAAAATTCCTCGGAACCATTCGTAACGTAGGTTTGGCTGTAGAAGCTCCT AAAAAAAGTCTTTGGGAAGCGATCTTCGGTGAAGGTTCCAGTTTTATTGATCAGATGCCT TCTAAAGTTTTCGAGGCGTTTGACAAAGAGTCTTATTACAAACTTACCGACTTGAGCAAA CGTGCAGACGCAATCAACGAAGCGAGTCTTTCTCTTACAGGAATTACTAAAAACAGAGCA AAGATCGGAAATCTGATCGGAGCAGAAGCAATTCTATACATAGGTTATCAAAAACCTTAT ACAGAGTGTAGTACTGAAAATAAAGTCGATGCG…	CACGTGGGTAATCTTCCTCCGAGTCTGGGATAACTTTCCGAAAGGGAAGCTAATACTGGA TGGTCCCGAGAGATCATAAGATTTTTCGGGTAAAGATTTATTGCTCGGAGATGAGCCCGC GTCCGATTAGCTAGTTGGTGAGGTAAAGGCTCACCAAGGCGACGATCGGTAGCCGGCCTG AGAGGGTGTTCGGCCACAATGGAACTGAGACACGGTCCATACTCCTACGGGAGGCAGCAG TTAAGAATCTTGCTCAATGGGGGGAACCCTGAAGCAGCGACGCCGCGTGAACGATGAAGG TCTTCGGATTGTAAAGTTCAGTAAGCAGGGAAAAATAAGCAGCAATGTGATGATGGTACC TGCCTAAAGCACCGGCTAACTACGTGCCAGCAG…	ATGCCGATCATTTTTGCTTCTTCTTTGATTTTGTTTCCGCAAACGATCATTCAATGGTTA TCCAATAGTAGTCAAGAATGGGCTGGATGGGCAGTGATTATGGATTTTTTCAATCCATTC TCTCAGATTTGGTACCACGCGTTGTTTTATTTTGTAATCTATACCACTTTGATTATATTC TTTGCATATTTTTATACTGCGATTCAGTTTAACCCTGCGGAGTTGGCTGAGAATCTGAAA AAATACGGCGGATTTATCCCAGGAATTCGCCCCGGTTCTCATACAAAAGAATACATCGAA AAAGTGTTAAATAGAATCACTCTCCCCGGAGCCATGTTTCTTGCCGGTTTGGCATTAGCA CCTTATATTATTATAAAATTCTTAGATTTGAGC…
156	R36	L.kirschneri	Tanzania	Cricetomys	CTTTCTATCCCTCAGATTTCCACAGGCGATATTCTCCGCGAAGCGGTAAAGAATCAAACT GAGATGGGAATCGAAGCAAAACGTTATATGGATGCAGGTGATCTGGTACCTGATTCTGTT GTGATCGGAATCATCAAAGATCGTATCCGTGAAGCGGATTGCAGAAATGGGTTTTTATTG GATGGATTTCCAAGAACTGTAGAACAGGCGGAAGCTTTAGATACACTTTTAAAAAATGAA GGTAGGTCTATTGATAAAGCGATTAATCTTCAGGTTCCGGATGCGGAACTTTTAAAAAGA TTACTCAGCCGGGCAGAAATTGAAGGCCGTGCGGACGATAACGAAGTGACGATTAAAAAT CGTCTAGATAATTATAACAAGAAGACTTTACCT…	TATCTCGATATAGAACTGGACTATTATGATTTAGGTGTGGAATACAGAGACAAAACGGAT GATAAAGTTACTGTGGATTCTGCTCACGCGATTCAAAAATACGGAGTAGGCGTAAAATGT GCGACGATTACTCCTAACCAAGATAGAGTTAAAGAATACAATCTCAAACAAGAATGGAAA TCTCCGAACGGAACCATTCGTTCTATTTTAGACGGAACCGTTTTTCGTAAACCGATCATC GTAAAAAACATTCCTCCTGCGGTTCGTTCTTGGAAAAAACCGATTACGGTAGGACGTCAC GCCTACGGAGATCTTTATAAGGACACAGAACTTTATATTCCCGAAGCCGGAAAAGTGGAA CTCGTTTATACCGGCAAGGACGGAAAAGAAAAA…	ATCTCCGTTGCACTCTTTGCAAGCATTACCGCTTGTGGTGCTTTCGGTGGTCTGCCAAGC CTAAAAAGCTCTTTTGTTCTGAGCGAGGACACAATCCCAGGGACAAACGAAACCGTAAAA ACGTTACTTCCCTACGGATCTGTGATCAACTATTACGGATACGTAAAGCCAGGACAAGCG CCGGACGGTTTAGTCGATGGAAACAAAAAAGCATACTATCTCTATGTTTGGATTCCTGCC GTAATCGCTGAAATGGGAGTTCGTATGATTTCCCCAACAGGCGAAATCGGTGAACCAGGC GATGGAGACTTAGTAAGCGACGCTTTCAAAGCGGCTACCCCAGAAGAAAAATCAATGCCA CATTGGTTTGATACTTGGATCCGTGTAGAAAGA…	GGAAATTGCGCAGCTACAGTTGATGTAGAATATCCGGTATTCCCGAAAGATAAAGAAGGC CGTGCACTTCAAAAATTCCTCGGAACCATTCGTAACGTAGGTTTGGCTGTAGAAGCTCCT AAAAAAAGTCTTTGGGAAGCGATCTTCGGTGAAGGTTCCAGTTTTATTGATCAGATGCCT TCTAAAGTTTTCGAGGCGTTTGACAAAGAGTCTTATTACAAACTTACCGACTTGAGCAAA CGTGCAGACGCAATCAACGAAGCGAGTCTTTCTCTTACAGGAATTACTAAAAACAGAGCA AAGATCGGAAATCTGATCGGAGCAGAAGCAATTCTATACATAGGTTATCAAAAACCTTAT ACAGAGTGTAGTACTGAAAATAAAGTCGATGCG…	CACGTGGGTAATCTTCCTCCGAGTCTGGGATAACTTTCCGAAAGGGAAGCTAATACTGGA TGGTCCCGAGAGATCATAAGATTTTTCGGGTAAAGATTTATTGCTCGGAGATGAGCCCGC GTCCGATTAGCTAGTTGGTGAGGTAAAGGCTCACCAAGGCGACGATCGGTAGCCGGCCTG AGAGGGTGTTCGGCCACAATGGAACTGAGACACGGTCCATACTCCTACGGGAGGCAGCAG TTAAGAATCTTGCTCAATGGGGGGAACCCTGAAGCAGCGACGCCGCGTGAACGATGAAGG TCTTCGGATTGTAAAGTTCAGTAAGCAGGGAAAAATAAGCAGCAATGTGATGATGGTACC TGCCTAAAGCACCGGCTAACTACGTGCCAGCAG…	ATGCCGATCATTTTTGCTTCTTCTTTGATTTTGTTTCCGCAAACGATCATTCAATGGTTA TCCAATAGTAGTCAAGAATGGGCTGGATGGGCAGTGATTATGGATTTTTTCAATCCATTC TCTCAGATTTGGTACCACGCGTTGTTTTATTTTGTAATCTATACCACTTTGATTATATTC TTTGCATATTTTTATACTGCGATTCAGTTTAACCCTGCGGAGTTGGCTGAGAATCTGAAA AAATACGGCGGATTTATCCCAGGAATTCGCCCCGGTTCTCATACAAAAGAATACATCGAA AAAGTGTTAAATAGAATCACTCTCCCCGGAGCCATGTTTCTTGCCGGTTTGGCATTAGCA CCTTATATTATTATAAAATTCTTAGATTTGAGC…
157	R37	L.kirschneri	Tanzania	Cricetomys	CTTTCTATCCCTCAGATTTCCACAGGCGATATTCTCCGCGAAGCGGTAAAGAATCAAACT GAGATGGGAATCGAAGCAAAACGTTATATGGATGCAGGTGATCTGGTACCTGATTCTGTT GTGATCGGAATCATCAAAGATCGTATCCGTGAAGCGGATTGCAGAAATGGGTTTTTATTG GATGGATTTCCAAGAACTGTAGAACAGGCGGAAGCTTTAGATACACTTTTAAAAAATGAA GGTAGGTCTATTGATAAAGCGATCAATCTTCAGGTTCCGGATGCGGAACTTTTAAAAAGA TTACTCAGCCGTGCAGAAATTGAAGGCCGTGCGGACGATAACGAAGTGACGATTAAAAAT CGTCTAGATAATTATAACAAGAAGACTTTACCT…	TATCTCGATATAGAACTGGACTATTATGATTTAGGTGTGGAATACAGAGACAAAACGGAT GATAAAGTTACTGTGGATTCTGCTCACGCGATTCAAAAATACGGAGTAGGCGTAAAATGT GCGACGATTACTCCTAACCAAGATAGAGTTAAAGAATACAATCTCAAACAAGAATGGAAA TCTCCGAACGGAACCATTCGTTCTATTTTAGACGGAACCGTTTTTCGTAAACCGATCATC GTAAAAAACATTCCTCCTGCGGTTCGTTCTTGGAAAAAACCGATTACGGTAGGACGTCAC GCCTACGGAGATCTTTATAAGGACACAGAACTTTATATTCCCGAAGCCGGAAAAGTGGAA CTCGTTTATACCGGCAAGGACGGAAAAGAAAAA…	ATCTCCGTTGCACTCTTTGCAAGCATTACCGCTTGTGGTGCTTTCGGTGGTCTGCCAAGC CTAAAAAGCTCTTTTGTTCTGAGCGAGGACACAATCCCAGGGACAAACGAAACCGTAAAA ACGTTACTTCCCTACGGATCTGTGATCAACTATTACGGATACGTAAAGCCAGGACAAGCG CCGGACGGTTTAGTCGATGGAAACAAAAAAGCATACTATCTCTATGTTTGGATTCCTGCC GTAATCGCTGAAATGGGAGTTCGTATGATTTCCCCAACAGGCGAAATCGGTGAACCAGGC GATGGAGACTTAGTAAGCGACGCTTTCAAAGCGGCTACCCCAGAAGAAAAATCAATGCCA CATTGGTTTGATACTTGGATCCGTGTAGAAAGA…	GGAAATTGCGCAGCTACAGTTGATGTAGAATATCCGGTATTCCCGAAAGATAAAGAAGGC CGTGCACTTCAAAAATTCCTCGGAACCATTCGTAACGTAGGTTTGGCTGTAGAAGCTCCT AAAAAAAGTCTTTGGGAAGCGATCTTCGGTGAAGGTTCCAGTTTTATTGATCAGATGCCT TCTAAAGTTTTCGAGGCGTTTGACAAAGAGTCTTATTACAAACTTACCGACCTGAGCAAA CGTGCAGACGCAATCAACGAAGCGAGTCTTTCTCTTACAGGAATTACTAAAAACAGAGCA AAGATCGGAAATCTGATCGGAGCAGAAGCAATTCTATACATAGGTTATCAAAAACCTTAT ACAGAGTGTAGTACTGAAAATAAAGTCGATGCG…	CACGTGGGTAATCTTCCTCCGAGTCTGGGATAACTTTCCGAAAGGGAAGCTAATACTGGA TGGTCCCGAGAGATCATAAGATTTTTCGGGTAAAGATTTATTGCTCGGAGATGAGCCCGC GTCCGATTAGCTAGTTGGTGAGGTAAAGGCTCACCAAGGCGACGATCGGTAGCCGGCCTG AGAGGGTGTTCGGCCACAATGGAACTGAGACACGGTCCATACTCCTACGGGAGGCAGCAG TTAAGAATCTTGCTCAATGGGGGGAACCCTGAAGCAGCGACGCCGCGTGAACGATGAAGG TCTTCGGATTGTAAAGTTCAGTAAGCAGGGAAAAATAAGCAGCAATGTGATGATGGTACC TGCCTAAAGCACCGGCTAACTACGTGCCAGCAG…	ATGCCGATCATTTTTGCTTCTTCTTTGATTTTGTTTCCGCAAACGATCATTCAATGGTTA TCCAATAGTAGTCAAGAATGGGCTGGATGGGCAGTGATTATGGATTTTTTCAATCCATTC TCTCAGATTTGGTACCACGCGTTGTTTTATTTTGTAATCTATACCACTTTGATTATATTC TTTGCATATTTTTATACTGCGATTCAGTTTAACCCTGCGGAGTTGGCTGAGAATCTGAAA AAATACGGCGGATTTATCCCAGGAATTCGCCCCGGTTCTCATACAAAAGAATACATCGAA AAAGTGTTAAATAGAATCACTCTCCCCGGAGCCATGTTTCTTGCCGGTTTGGCATTAGCA CCTTATATTATTATAAAATTCTTAGATTTGAGC…
158	R38	L.kirschneri	Tanzania	Cricetomys	CTTTCTATCCCTCAGATTTCCACAGGCGATATTCTCCGCGAAGCGGTAAAGAATCAAACT GAGATGGGAATCGAAGCAAAACGTTATATGGATGCAGGTGATCTGGTACCTGATTCTGTT GTGATCGGAATCATCAAAGATCGTATCCGTGAAGCGGATTGCAGAAATGGGTTTTTATTG GATGGATTTCCAAGAACTGTAGAACAGGCGGAAGCTTTAGATACACTTTTAAAAAATGAA GGTAGGTCTATTGATAAAGCGATCAATCTTCAGGTTCCGGATGCGGAACTTTTAAAAAGA TTACTCAGCCGTGCAGAAATTGAAGGCCGTGCGGACGATAACGAAGTGACGATTAAAAAT CGTCTAGATAATTATAACAAGAAGACTTTACCT…	TATCTCGATATAGAACTGGACTATTATGATTTAGGTGTGGAATACAGAGACAAAACGGAT GATAAAGTTACTGTGGATTCTGCTCACGCGATTCAAAAATACGGAGTAGGCGTAAAATGT GCGACGATTACTCCTAACCAAGATAGAGTTAAAGAATACAATCTCAAACAAGAATGGAAA TCTCCGAACGGAACCATTCGTTCTATTTTAGACGGAACCGTTTTTCGTAAACCGATCATC GTAAAAAACATTCCTCCTGCGGTTCGTTCTTGGAAAAAACCGATTACGGTAGGACGTCAC GCCTACGGAGATCTTTATAAGGACACAGAACTTTATATTCCCGAAGCCGGAAAAGTGGAA CTCGTTTATACCGGCAAGGACGGAAAAGAAAAA…	ATCTCCGTTGCACTCTTTGCAAGCATTACCGCTTGTGGTGCTTTCGGTGGTCTGCCAAGC CTAAAAAGCTCTTTTGTTCTGAGCGAGGACACAATCCCAGGGACAAACGAAACCGTAAAA ACGTTACTTCCCTACGGATCTGTGATCAACTATTACGGATACGTAAAGCCAGGACAAGCG CCGGACGGTTTAGTCGATGGAAACAAAAAAGCATACTATCTCTATGTTTGGATTCCTGCC GTAATCGCTGAAATGGGAGTTCGTATGATTTCCCCAACAGGCGAAATCGGTGAACCAGGC GATGGAGACTTAGTAAGCGACGCTTTCAAAGCGGCTACCCCAGAAGAAAAATCAATGCCA CATTGGTTTGATACTTGGATCCGTGTAGAAAGA…	GGAAATTGCGCAGCTACAGTTGATGTAGAATATCCGGTATTCCCGAAAGATAAAGAAGGC CGTGCACTTCAAAAATTCCTCGGAACCATTCGTAACGTAGGTTTGGCTGTAGAAGCTCCT AAAAAAAGTCTTTGGGAAGCGATCTTCGGTGAAGGTTCCAGTTTTATTGATCAGATGCCT TCTAAAGTTTTCGAGGCGTTTGACAAAGAGTCTTATTACAAACTTACCGACCTGAGCAAA CGTGCAGACGCAATCAACGAAGCGAGTCTTTCTCTTACAGGAATTACTAAAAACAGAGCA AAGATCGGAAATCTGATCGGAGCAGAAGCAATTCTATACATAGGTTATCAAAAACCTTAT ACAGAGTGTAGTACTGAAAATAAAGTCGATGCG…	CACGTGGGTAATCTTCCTCCGAGTCTGGGATAACTTTCCGAAAGGGGAGCTAATACTGGA TGGTCCCGAGAGATCATAAGATTTTTCGGGTAAAGATTTATTGCTCGGAGATGAGCCCGC GTCCGATTAGCTAGTTGGTGAGGTAAAGGCTCACCAAGGCGACGATCGGTAGCCGGCCTG AGAGGGTGTTCGGCCACAATGGAACTGAGACACGGTCCATACTCCTACGGGAGGCAGCAG TTAAGAATCTTGCTCAATGGGGGGAACCCTGAAGCAGCGACGCCGCGTGAACGATGAAGG TCTTCGGATTGTAAAGTTCAGTAAGCAGGGAAAAATAAGCAGCAATGTGATGATGGTACC TGCCTAAAGCACCGGCTAACTACGTGCCAGCAG…	ATGCCGATCATTTTTGCTTCCTCTTTGATTTTGTTTCCGCAAACGATCATTCAATGGTTA TCCAACAGTAGTCAAGAATGGGCTGGATGGGCAGTGATTATGGATTTTTTCAATCCATTC TCTCAGATTTGGTACCACGCGTTGTTTTATTTTGTGATCTATACCACTTTGATTATATTC TTTGCATACTTTTATACTGCGATTCAGTTTAACCCTGCGGAGTTGGCTGAGAATCTGAAA AAATACGGCGGGTTTATCCCAGGAATTCGCCCCGGTTCTCATACAAAAGAATACATCGAA AAAGTGTTAAATAGAATCACCCTTCCTGGAGCCATGTTTCTTGCCGGTTTGGCATTAGCA CCTTATATTATTATAAAATTCTTAGATCTTAGC…
159	R48	L.kirschneri	Tanzania	Cricetomys	CTTTCTATCCCTCAGATTTCCACAGGCGATATTCTCCGCGAAGCGGTAAAGAATCAAACT GAGATGGGAATCGAAGCAAAACGTTATATGGATGCAGGTGATCTGGTACCTGATTCTGTT GTGATCGGAATCATCAAAGATCGTATCCGTGAAGCGGATTGCAGAAATGGGTTTTTATTG GATGGATTTCCAAGAACTGTAGAACAGGCGGAAGCTTTAGATACACTTTTAAAAAATGAA GGTAGGTCTATTGATAAAGCGATTAATCTTCAGGTTCCGGATGCGGAACTTTTAAAAAGA TTACTCAGCCGGGCAGAAATTGAAGGCCGTGCGGACGATAACGAAGTGACGATTAAAAAT CGTCTAGATAATTATAACAAGAAGACTTTACCT…	TATCTCGATATAGAACTGGACTATTATGATTTAGGTGTGGAATACAGAGACAAAACGGAT GATAAAGTTACTGTGGATTCTGCTCACGCGATTCAAAAATACGGAGTAGGCGTAAAATGT GCGACGATTACTCCTAACCAAGATAGAGTTAAAGAATACAATCTCAAACAAGAATGGAAA TCTCCGAACGGAACCATTCGTTCTATTTTAGACGGAACCGTTTTTCGTAAACCGATCATC GTAAAAAACATTCCTCCTGCGGTTCGTTCTTGGAAAAAACCGATTACGGTAGGACGTCAC GCCTACGGAGATCTTTATAAGGACACAGAACTTTATATTCCCGAAGCCGGAAAAGTGGAA CTCGTTTATACCGGCAAGGACGGAAAAGAAAAA…	ATCTCCGTTGCACTCTTTGCAAGCATTACCGCTTGTGGTGCTTTCGGTGGTCTGCCAAGC CTAAAAAGCTCTTTTGTTCTGAGCGAGGACACAATCCCAGGGACAAACGAAACCGTAAAA ACGTTACTTCCCTACGGATCTGTGATCAACTATTACGGATACGTAAAGCCAGGACAAGCG CCGGACGGTTTAGTCGATGGAAACAAAAAAGCATACTATCTCTATGTTTGGATTCCTGCC GTAATCGCTGAAATGGGAGTTCGTATGATTTCCCCAACAGGCGAAATCGGTGAACCAGGC GATGGAGACTTAGTAAGCGACGCTTTCAAAGCGGCTACCCCAGAAGAAAAATCAATGCCA CATTGGTTTGATACTTGGATCCGTGTAGAAAGA…	GGAAATTGCGCAGCTACAGTTGATGTAGAATATCCGGTATTCCCGAAAGATAAAGAAGGC CGTGCACTTCAAAAATTCCTCGGAACCATTCGTAACGTAGGTTTGGCTGTAGAAGCTCCT AAAAAAAGTCTTTGGGAAGCGATCTTCGGTGAAGGTTCCAGTTTTATTGATCAGATGCCT TCTAAAGTTTTCGAGGCGTTTGACAAAGAGTCTTATTACAAACTTACCGACTTGAGCAAA CGTGCAGACGCAATCAACGAAGCGAGTCTTTCTCTTACAGGAATTACTAAAAACAGAGCA AAGATCGGAAATCTGATCGGAGCAGAAGCAATTCTATACATAGGTTATCAAAAACCTTAT ACAGAGTGTAGTACTGAAAATAAAGTCGATGCG…	CACGTGGGTAATCTTCCTCCGAGTCTGGGATAACTTTCCGAAAGGGAAGCTAATACTGGA TGGTCCCGAGAGATCATAAGATTTTTCGGGTAAAGATTTATTGCTCGGAGATGAGCCCGC GTCCGATTAGCTAGTTGGTGAGGTAAAGGCTCACCAAGGCGACGATCGGTAGCCGGCCTG AGAGGGTGTTCGGCCACAATGGAACTGAGACACGGTCCATACTCCTACGGGAGGCAGCAG TTAAGAATCTTGCTCAATGGGGGGAACCCTGAAGCAGCGACGCCGCGTGAACGATGAAGG TCTTCGGATTGTAAAGTTCAGTAAGCAGGGAAAAATAAGCAGCAATGTGATGATGGTACC TGCCTAAAGCACCGGCTAACTACGTGCCAGCAG…	ATGCCGATCATTTTTGCTTCTTCTTTGATTTTGTTTCCGCAAACGATCATTCAATGGTTA TCCAATAGTAGTCAAGAATGGGCTGGATGGGCAGTGATTATGGATTTTTTCAATCCATTC TCTCAGATTTGGTACCACGCGTTGTTTTATTTTGTAATCTATACCACTTTGATTATATTC TTTGCATATTTTTATACTGCGATTCAGTTTAACCCTGCGGAGTTGGCTGAGAATCTGAAA AAATACGGCGGATTTATCCCAGGAATTCGCCCCGGTTCTCATACAAAAGAATACATCGAA AAAGTGTTAAATAGAATCACTCTCCCCGGAGCCATGTTTCTTGCCGGTTTGGCATTAGCA CCTTATATTATTATAAAATTCTTAGATTTGAGC…
160	R49	L.kirschneri	Tanzania	Cricetomys	CTTTCTATCCCTCAGATTTCCACAGGCGATATTCTCCGCGAAGCGGTAAAGAATCAAACT GAGATGGGAATCGAAGCAAAACGTTATATGGATGCAGGTGATCTGGTACCTGATTCTGTT GTGATCGGAATCATCAAAGATCGTATCCGTGAAGCGGATTGCAGAAATGGGTTTTTATTG GATGGATTTCCAAGAACTGTAGAACAGGCGGAAGCTTTAGATACACTTTTAAAAAATGAA GGTAGGTCTATTGATAAAGCGATTAATCTTCAGGTTCCGGATGCGGAACTTTTAAAAAGA TTACTCAGCCGGGCAGAAATTGAAGGCCGTGCGGACGATAACGAAGTGACGATTAAAAAT CGTCTAGATAATTATAACAAGAAGACTTTACCT…	TATCTCGATATAGAACTGGACTATTATGATTTAGGTGTGGCATACAGAGACAAAACGGAT GATAAAGTTACTGTGGATTCTGCTCACGCGATTCAAAAATACGGAGGAGGCGTAAAATGT GCGACGATTACTCCTAACCAAGATAGAGTTAAAGAATACAATCTCAAACAAGAATGGAAA TCTCCGAACGGAACCATTCGTTCTATTTTAGACGGAACCGTTTTTCGTAAACCGATCATC GTAAAAAACATTCCTCCTGCGGTTCGTTCTTGGAAAAAACCGATTACGGTAGGACGTCAC GCCTACGGAGATCTTTATAAGGACACAGAACTTTATATTCCCGAAGCCGGAAAAGTGGAA CTCGTTTATACCGGCAAGGACGGAAAAGAAAAA…	ATCTCCGTTGCACTCTTTGCAAGCATTACCGCTTGTGGTGCTTTCGGTGGTCTGCCAAGC CTAAAAAGCTCTTTTGTTCTGAGCGAGGACACAATCCCAGGGACAAACGAAACCGTAAAA ACGTTACTTCCCTACGGATCTGTGATCAACTATTACGGATACGTAAAGCCAGGACAAGCG CCGGACGGTTTAGTCGATGGAAACAAAAAAGCATACTATCTCTATGTTTGGATTCCTGCC GTAATCGCTGAAATGGGAGTTCGTATGATTTCCCCAACAGGCGAAATCGGTGAACCAGGC GATGGAGACTTAGTAAGCGACGCTTTCAAAGCGGCTACCCCAGAAGAAAAATCAATGCCA CATTGGTTTGATACTTGGATCCGTGTAGAAAGA…	GGAAATTGCGCAGCTACAGTTGATGTAGAATATCCGGTATTCCCGAAAGATAAAGAAGGC CGTGCACTTCAAAAATTCCTCGGAACCATTCGTAACGTAGGTTTGGCTGTAGAAGCTCCT AAAAAAAGTCTTTGGGAAGCGATCTTCGGTGAAGGTTCCAGTTTTATTGATCAGATGCCT TCTAAAGTTTTCGAGGCGTTTGACAAAGAGTCTTATTACAAACTTACCGACTTGAGCAAA CGTGCAGACGCAATCAACGAAGCGAGTCTTTCTCTTACAGGAATTACTAAAAACAGAGCA AAGATCGGAAATCTGATCGGAGCAGAAGCAATTCTATACATAGGTTATCAAAAACCTTAT ACAGAGTGTAGTACTGAAAATAAAGTCGATGCG…	CACGTGGGTAATCTTCCTCCGAGTCTGGGATAACTTTCCGAAAGGGAAGCTAATACTGGA TGGTCCCGAGAGATCATAAGATTTTTCGGGTAAAGATTTATTGCTCGGAGATGAGCCCGC GTCCGATTAGCTAGTTGGTGAGGTAAAGGCTCACCAAGGCGACGATCGGTAGCCGGCCTG AGAGGGTGTTCGGCCACAATGGAACTGAGACACGGTCCATACTCCTACGGGAGGCAGCAG TTAAGAATCTTGCTCAATGGGGGGAACCCTGAAGCAGCGACGCCGCGTGAACGATGAAGG TCTTCGGATTGTAAAGTTCAGTAAGCAGGGAAAAATAAGCAGCAATGTGATGATGGTACC TGCCTAAAGCACCGGCTAACTACGTGCCAGCAG…	ATGCCGATCATTTTTGCTTCTTCTTTGATTTTGTTTCCGCAAACGATCATTCAATGGTTA TCCAATAGTAGTCAAGAATGGGCTGGATGGGCAGTGATTATGGATTTTTTCAATCCATTC TCTCAGATTTGGTACCACGCGTTGTTTTATTTTGTAATCTATACCACTTTGATTATATTC TTTGCATATTTTTATACTGCGATTCAGTTTAACCCTGCGGAGTTGGCTGAGAATCTGAAA AAATACGGCGGATTTATCCCAGGAATTCGCCCCGGTTCTCATACAAAAGAATACATCGAA AAAGTGTTAAATAGAATCACTCTCCCCGGAGCCATGTTTCTTGCCGGTTTGGCATTAGCA CCTTATATTATTATAAAATTCTTAGATTTGAGC…
161	R57	L.kirschneri	Ireland	Bank Vole (Clethrionomys glaredus)	CTTTCTATCCCTCAGATTTCCACAGGCGATATTCTCCGCGAAGCGGTAAAGAATCAAACT GAGATGGGAATCGAAGCAAAACGTTATATGGATGCAGGTGATCTGGTACCTGATTCTGTT GTGATCGGAATCATCAAAGATCGTATCCGTGAAGCGGATTGCAGAAATGGGTTTTTATTG GATGGATTTCCAAGAACTGTAGAACAGGCGGAAGCTTTAGATACACTTTTAAAAAATGAA GGTAGGTCTATTGATAAAGCGATTAATCTTCAGGTTCCGGATGCAGAACTTTTAAAAAGA TTACTCAGCCGTGCAGAAATTGAAGGCCGTGCGGACGATAACGAAGTGACGATTAAAAAT CGTCTAGATAATTATAACAAGAAGACTTTACCT…	TATCTCGATATAGAACTGGACTATTATGATTTAGGTGTGGAATACAGAGACAAAACGGAT GATAAGGTTACCGTGGATTCCGCTCACGCGATTCAAAAATACGGAGTAGGCGTAAAATGT GCGACGATTACTCCTACCCAGGATAGAGTTAAAGAATACAATCTCAAACAAGAATGGAAA TCTCCGAACGGAACCATTCGTTCTATTTTAGACGGAACCGTTTTTCGTAAACCGATCATC GTAAAAAACATTCCTCCTGCGGTTCGTTCTTGGAAAAAACCGATTACGGTAGGACGTCAC GCCTACGGAGATCTTTATAAGGACACAGATCTTTATATTCCCGAAGCCGGAAAAGTGGAA CTCGTTTATACCGGCAAGGACGGAAAAGAAAAA…	ATCTCCGTTGCACTCTTTGCAAGCATTACCGCTTGTGGTGCTTTCGGTGGTCTGCCAAGC CTAAAAAGCTCTTTTGTTCTGAGCGAGGACACAATCCCAGGGACAAACGAAACCGTAAAA ACGTTACTTCCCTACGGATCTGTGATCAACTATTACGGATACGTAAAGCCAGGACAAGCG CCGGACGGTTTAGTCGATGGAAACAAAAAAGCATACTATCTCTATGTTTGGATTCCTGCC GTAATCGCTGAAATGGGAGTTCGTATGATTTCCCCAACAGGCGAAATCGGTGAACCAGGC GATGGAGACTTAGTAAGCGACGCTTTCAAAGCGGCTACCCCAGAAGAAAAATCAATGCCA CATTGGTTTGATACTTGGATCCGTGTAGAAAGA…	GGAAATTGCGCAGCTACAGTTGATGTAGAATATCCGGTATTCCCGAAAGATAAAGAAGGC CGTGCACTTCAAAAATTCCTCGGAACCATTCGTAACGTAGGTTTGGCTGTAGAAGCTCCT AAAAAAAGTCTTTGGGAAGCGATCTTCGGTGAAGGTTCCAGTTTTATTGATCAGATGCCT TCTAAAGTTTTCGAGGCGTTTGACAAAGAGTCTTATTACAAACTTACCGACCTGAGCAAA CGTGCAGACGCAATCAACGAAGCGAGTCTTTCTCTTACAGGAATTACTAAAAACAGAGCA AAGATCGGAAATCTGATCGGAGCAGAAGCAATTCTATACATAGGTTATCAAAAACCTTAT ACAGAGTGTAGTACTGAAAATAAAGTCGATGCG…	CACGTGGGTAATCTTCCTCCGAGTCTGGGATAACTTTCCGAAAGGGAAGCTAATACTGGA TGGTCCCGAGAGATCATAAGATTTTTCGGGTAAAGATTTATTGCTCGGAGATGAGCCCGC GTCCGATTAGCTAGTTGGTGAGGTAAAGGCTCACCAAGGCGACGATCGGTAGCCGGCCTG AGAGGGTGTTCGGCCACAATGGAACTGAGACACGGTCCATACTCCTACGGGAGGCAGCAG TTAAGAATCTTGCTCAATGGGGGGAACCCTGAAGCAGCGACGCCGCGTGAACGATGAAGG TCTTCGGATTGTAAAGTTCAGTAAGCAGGGAAAAATAAGCAGCAATGTGATGATGGTACC TGCCTAAAGCACCGGCTAACTACGTGCCAGCAG…	ATGCCGATCATTTTTGCTTCTTCTTTGATTTTGTTTCCGCAAACGATCATTCAATGGTTA TCCAATAGTAGTCAAGAATGGGCTGGATGGGCAGTGATTATGGATTTTTTCAATCCATTC TCTCAGATTTGGTACCACGCGTTGTTTTATTTTGTAATCTATACCACTTTGATTATATTC TTTGCATATTTTTATACTGCGATTCAGTTTAACCCTGCGGAGTTGGCTGAGAATCTGAAA AAATACGGCGGATTTATCCCAGGAATTCGCCCCGGTTCTCATACAAAAGAATACATCGAA AAAGTGTTAAATAGAATCACTCTCCCCGGAGCCATGTTTCTTGCCGGTTTGGCATTAGCA CCTTATATTATTATAAAATTCTTAGATTTGAGC…
[truncated: 110 more rows]
